# Supplementary material for: C/EBPδ-induced epigenetic changes control the dynamic gene transcription of S100a8 and S100a9
Source: eLife. 2022 May 11;11:e75594. doi: 10.7554/eLife.75594 (PMC9122501; doi:10.7554/eLife.75594)
Supplement: Figure 1—source data 1. [file elife-75594-fig1-data1.xlsx]

## Sheet: mageck.gene_summary
Gene summary of MaGeCK analysis
id	num	neg|score	neg|p-value	neg|fdr	neg|rank	neg|goodsgrna	neg|lfc	pos|score	pos|p-value	pos|fdr	pos|rank	pos|goodsgrna	pos|lfc
Manea	3	0.83947	0.84215	0.97445	13949	1	2.4482	1.7882e-05	6.1045e-05	0.497525	1	2	2.4482
Procr	2	0.081275	0.14026	0.901639	1856	1	0.18311	4.0387e-05	6.1659e-05	0.497525	2	1	0.18311
Htr1f	2	0.99993	0.99993	0.999934	16138	0	2.233	6.6888e-05	0.00011688	0.628713	3	2	2.233
Creb1	1	0.99984	0.99986	0.99992	16137	0	3.0386	0.00016155	0.00016166	0.652228	4	1	3.0386
Itln1	2	0.83561	0.83526	0.973802	13615	0	1.0538	0.00020193	0.00040523	0.866166	5	1	1.0538
Trip13	4	0.86923	0.88697	0.994154	14107	1	-0.059773	0.0002423	0.00068929	0.866166	6	1	-0.059773
Ifit3	3	0.83947	0.84215	0.97445	13897	1	1.9101	0.00026062	0.00075187	0.866166	7	2	1.9101
Phf8	2	0.9997	0.9997	0.999822	16136	0	1.8277	0.00030301	0.00058254	0.866166	8	2	1.8277
Csrp1	2	0.95642	0.95651	0.994154	15327	0	1.2301	0.00032308	0.00062794	0.866166	9	1	1.2301
mmu-mir-8109	2	0.99961	0.99961	0.999794	16135	0	1.9351	0.00039404	0.00076107	0.866166	10	2	1.9351
2410124H12Rik	1	0.99952	0.99954	0.999788	16132	0	2.8456	0.00048465	0.00048499	0.866166	13	1	2.8456
Ctxn3	1	0.99952	0.99954	0.999788	16133	0	2.8456	0.00048465	0.00048499	0.866166	11	1	2.8456
Shf	1	0.99952	0.99954	0.999788	16134	0	2.8456	0.00048465	0.00048499	0.866166	12	1	2.8456
Hand1	2	0.9995	0.9995	0.999788	16131	0	1.6794	0.00050335	0.00099237	0.866166	14	2	1.6794
Olfr170	2	0.3232	0.42683	0.921989	6030	1	0.67679	0.00060572	0.0011764	0.866166	16	1	0.67679
Cab39l	2	0.91302	0.91293	0.994154	14743	0	1.2083	0.00060572	0.0011764	0.866166	15	1	1.2083
Alox12b	3	0.93335	0.93355	0.994154	15068	0	-0.99	0.00066625	0.0015323	0.866166	17	1	-0.99
Casp4	2	0.99933	0.99934	0.999788	16130	0	2.113	0.00067336	0.0013151	0.866166	18	2	2.113
Cebpd	4	0.99262	0.99262	0.999196	16014	0	1.3602	0.00075331	0.0020777	0.866166	19	3	1.3602
Atg4d	2	0.83561	0.83526	0.973802	13729	0	0.95844	0.00076722	0.001482	0.866166	20	1	0.95844
Phactr1	2	0.99915	0.99915	0.999711	16128	0	1.4371	0.00085266	0.0016323	0.866166	22	2	1.4371
Acy3	2	0.99915	0.99915	0.999711	16129	0	1.5825	0.00085266	0.0016323	0.866166	21	2	1.5825
Fam129c	1	0.99911	0.99914	0.999711	16126	0	2.7009	0.00088853	0.00088132	0.866166	23	1	2.7009
Cnot2	1	0.99911	0.99914	0.999711	16127	0	2.7009	0.00088853	0.00088132	0.866166	24	1	2.7009
Ssna1	3	0.54352	0.6728	0.958804	9134	1	-1.3899	0.00090845	0.0019985	0.866166	25	1	-1.3899
2010109I03Rik	2	0.95642	0.95651	0.994154	15336	0	1.1336	0.00096907	0.0018427	0.866166	26	1	1.1336
Ssr4	1	0.99893	0.99897	0.999711	16124	0	2.6227	0.0010703	0.0010433	0.866166	27	1	2.6227
mmu-mir-7086	1	0.99893	0.99897	0.999711	16125	0	2.6227	0.0010703	0.0010433	0.866166	28	1	2.6227
Krtap1-5	2	0.99043	0.99041	0.998995	15958	0	1.4387	0.0011709	0.0022716	0.866166	29	1	1.4387
Olfr656	2	0.23399	0.3626	0.921989	4713	1	0.23458	0.0012516	0.0024249	0.866166	30	1	0.23458
Usp11	2	0.99874	0.99872	0.999709	16122	0	1.2292	0.0012603	0.0024415	0.866166	31	2	1.2292
Olfr1247	2	0.95642	0.95651	0.994154	15381	0	1.0976	0.0013324	0.0025808	0.866166	32	1	1.0976
Fam160b1	1	0.99865	0.99871	0.999709	16119	0	2.5401	0.001353	0.0013316	0.866166	34	1	2.5401
Eif4enif1	1	0.99865	0.99871	0.999709	16120	0	2.5401	0.001353	0.0013316	0.866166	33	1	2.5401
Olfr1239	1	0.99865	0.99871	0.999709	16121	0	2.5401	0.001353	0.0013316	0.866166	35	1	2.5401
Mars2	2	0.95642	0.95651	0.994154	15317	0	1.0954	0.0014131	0.0027427	0.866166	36	1	1.0954
Gm14151	2	0.99846	0.99843	0.999673	16117	0	1.143	0.0015395	0.003001	0.866166	38	2	1.143
Olfr455	2	0.99846	0.99843	0.999673	16118	0	1.143	0.0015395	0.003001	0.866166	37	2	1.143
Fam115a	1	0.99834	0.99841	0.999673	16116	0	2.5359	0.0016559	0.0016267	0.866166	39	1	2.5359
Ing5	2	0.29371	0.40931	0.921989	5706	1	0.27327	0.0017763	0.0034814	0.866166	41	1	0.27327
Rrbp1	2	0.469	0.52137	0.924505	8413	1	0.45392	0.0017763	0.0034814	0.866166	40	1	0.45392
Vmn1r176	3	0.9909	0.99101	0.998995	16001	0	1.4444	0.0018438	0.0037612	0.866166	42	2	1.4444
Olfr433	2	0.99808	0.99804	0.999584	16113	0	1.5294	0.001922	0.0037808	0.866166	43	2	1.5294
Pla2g4d	2	0.99801	0.99797	0.999584	16112	0	1.5445	0.0019863	0.0039078	0.866166	44	2	1.5445
Car3	3	0.72785	0.76399	0.958804	11940	1	1.4942	0.002019	0.0040784	0.866166	45	2	1.4942
Acsl4	2	0.99797	0.99794	0.999584	16111	0	1.3968	0.0020261	0.0039888	0.866166	46	2	1.3968
Fam154b	1	0.99796	0.998	0.999584	16106	0	2.4524	0.0020396	0.0020139	0.866166	47	1	2.4524
Clca3	1	0.99796	0.998	0.999584	16107	0	2.4524	0.0020396	0.0020139	0.866166	51	1	2.4524
Caln1	1	0.99796	0.998	0.999584	16108	0	2.4524	0.0020396	0.0020139	0.866166	50	1	2.4524
Mob1b	1	0.99796	0.998	0.999584	16109	0	2.4524	0.0020396	0.0020139	0.866166	49	1	2.4524
Slc16a10	1	0.99796	0.998	0.999584	16110	0	2.4524	0.0020396	0.0020139	0.866166	48	1	2.4524
Kcnip1	2	0.99791	0.99787	0.999584	16105	0	1.0326	0.0020884	0.0041118	0.866166	52	2	1.0326
Myl2	2	0.99789	0.99785	0.999584	16104	0	1.4024	0.0021124	0.0041508	0.866166	53	2	1.4024
Ckb	2	0.99779	0.99775	0.999584	16103	0	1.5941	0.0022063	0.0043428	0.866166	54	2	1.5941
Arhgef3	3	0.96136	0.96163	0.994908	15598	0	0.62187	0.0022398	0.004479	0.866166	55	1	0.62187
2010015L04Rik	2	0.95642	0.95651	0.994154	15500	0	1.0193	0.0023411	0.0045962	0.866166	56	1	1.0193
Rerg	1	0.99766	0.99771	0.999584	16102	0	2.4467	0.0023425	0.0023182	0.866166	57	1	2.4467
Upk1b	3	0.83947	0.84215	0.97445	13875	1	1.2549	0.0025082	0.0049821	0.866166	58	2	1.2549
Mesdc1	3	0.22314	0.37241	0.921989	4634	2	-1.7931	0.0026632	0.0052809	0.866166	60	1	-1.7931
Tspan15	3	0.28443	0.43692	0.921989	5594	2	-1.5716	0.0026632	0.0052809	0.866166	59	1	-1.5716
Gfer	2	0.70463	0.70607	0.958804	11596	1	0.61507	0.0027041	0.0053158	0.866166	62	1	0.61507
Crispld2	2	0.89715	0.897	0.994154	14503	0	0.88815	0.0027041	0.0053158	0.866166	61	1	0.88815
Pan2	2	0.99726	0.99722	0.999584	16097	0	1.6502	0.0027397	0.0053717	0.866166	63	2	1.6502
Gm5938	2	0.99726	0.99722	0.999584	16098	0	1.1073	0.0027397	0.0053717	0.866166	66	2	1.1073
Zfp39	2	0.99726	0.99722	0.999584	16099	0	1.3265	0.0027397	0.0053717	0.866166	64	2	1.3265
Zfp583	2	0.99726	0.99722	0.999584	16100	0	1.0105	0.0027397	0.0053717	0.866166	67	2	1.0105
Pim3	2	0.99726	0.99722	0.999584	16101	0	0.98483	0.0027397	0.0053717	0.866166	65	2	0.98483
1110008F13Rik	1	0.99725	0.99732	0.999584	16090	0	2.359	0.0027464	0.0027194	0.866166	72	1	2.359
Vmn1r234	1	0.99725	0.99732	0.999584	16091	0	2.359	0.0027464	0.0027194	0.866166	69	1	2.359
Ptov1	1	0.99725	0.99732	0.999584	16092	0	2.359	0.0027464	0.0027194	0.866166	68	1	2.359
NonTargetingControlGuideForMouse_0794	1	0.99725	0.99732	0.999584	16093	0	2.359	0.0027464	0.0027194	0.866166	74	1	2.359
Dpf1	1	0.99725	0.99732	0.999584	16094	0	2.359	0.0027464	0.0027194	0.866166	73	1	2.359
mmu-mir-6377	1	0.99725	0.99732	0.999584	16095	0	2.359	0.0027464	0.0027194	0.866166	71	1	2.359
Wsb1	1	0.99725	0.99732	0.999584	16096	0	2.359	0.0027464	0.0027194	0.866166	70	1	2.359
Mapre2	2	0.98451	0.98458	0.998995	15888	0	1.2332	0.0030268	0.0059232	0.866166	75	1	1.2332
Ipp	1	0.99697	0.99706	0.999584	16089	0	2.3533	0.0030291	0.0030041	0.866166	76	1	2.3533
mmu-mir-5122	1	0.99691	0.997	0.999584	16087	0	2.3548	0.0030897	0.0030642	0.866166	77	1	2.3548
Olfr771	3	0.83947	0.84215	0.97445	13943	1	-1.1512	0.0032074	0.006311	0.866166	78	1	-1.1512
Arid3c	2	0.99677	0.99675	0.999584	16086	0	1.0085	0.0032314	0.0062999	0.866166	79	2	1.0085
Krtap19-4	2	0.95642	0.95651	0.994154	15376	0	1.2621	0.00343	0.0066656	0.866166	80	1	1.2621
Sycp1	2	0.99652	0.9965	0.999584	16085	0	1.047	0.0034794	0.0067625	0.866166	81	2	1.047
Tnfrsf21	3	0.79199	0.80543	0.973342	13359	1	-0.57831	0.0035096	0.0068895	0.866166	82	1	-0.57831
Fgd1	2	0.83561	0.83526	0.973802	13599	0	0.87418	0.0035106	0.0068202	0.866166	83	1	0.87418
2310007L24Rik	3	0.21769	0.36667	0.921989	4625	1	1.7479	0.0035803	0.0070214	0.866166	84	2	1.7479
Defb20	1	0.99639	0.99649	0.999584	16079	0	2.2592	0.0036147	0.0035692	0.866166	85	1	2.2592
Daw1	1	0.99639	0.99649	0.999584	16080	0	2.2592	0.0036147	0.0035692	0.866166	89	1	2.2592
mmu-mir-7082	1	0.99639	0.99649	0.999584	16081	0	2.2592	0.0036147	0.0035692	0.866166	86	1	2.2592
NonTargetingControlGuideForMouse_0257	1	0.99639	0.99649	0.999584	16082	0	2.2592	0.0036147	0.0035692	0.866166	88	1	2.2592
Hspa5	1	0.99639	0.99649	0.999584	16083	0	2.2592	0.0036147	0.0035692	0.866166	90	1	2.2592
NonTargetingControlGuideForMouse_0994	1	0.99639	0.99649	0.999584	16084	0	2.2592	0.0036147	0.0035692	0.866166	87	1	2.2592
Gpx6	2	0.99622	0.99617	0.999584	16078	0	1.3636	0.0037811	0.0073129	0.866166	91	2	1.3636
Tcf3	2	0.99616	0.99612	0.999584	16077	0	1.0926	0.0038359	0.0074202	0.866166	92	2	1.0926
Gpd2	3	0.61306	0.7037	0.958804	10653	1	0.44108	0.0040535	0.0079288	0.866166	93	1	0.44108
Znrd1	2	0.26145	0.39013	0.921989	4970	1	-0.19758	0.004075	0.0076926	0.866166	96	1	-0.19758
Smad3	2	0.469	0.52137	0.924505	8447	1	0.32966	0.004075	0.0076926	0.866166	99	1	0.32966
Mageh1	2	0.58004	0.6017	0.924505	9241	1	0.44038	0.004075	0.0076926	0.866166	95	1	0.44038
Clk4	2	0.58004	0.6017	0.924505	9398	1	0.44038	0.004075	0.0076926	0.866166	100	1	0.44038
Phlda1	2	0.95642	0.95651	0.994154	15504	0	0.93703	0.004075	0.0076926	0.866166	97	1	0.93703
Snx27	2	0.95642	0.95651	0.994154	15509	0	0.93703	0.004075	0.0076926	0.866166	94	1	0.93703
Il21	2	0.98825	0.98827	0.998995	15935	0	1.2367	0.004075	0.0076926	0.866166	98	1	1.2367
St14	1	0.99584	0.99595	0.999584	16075	0	2.2536	0.0041599	0.0041115	0.866166	101	1	2.2536
B3gnt6	1	0.9956	0.99571	0.999584	16072	0	2.5255	0.0044023	0.0043348	0.866166	102	1	2.5255
Zfp791	3	0.99696	0.99699	0.999584	16088	0	1.0311	0.0044977	0.0087626	0.866166	103	2	1.0311
Commd1	3	0.50168	0.65562	0.958804	8640	1	0.043534	0.0047179	0.0091694	0.866166	104	1	0.043534
Olfr1018	2	0.95642	0.95651	0.994154	15363	0	0.93493	0.0048809	0.008443	0.866166	105	1	0.93493
Angel1	2	0.98061	0.98068	0.998995	15818	0	1.1099	0.0048809	0.008443	0.866166	106	1	1.1099
Scd1	3	0.21769	0.36667	0.921989	4623	1	-0.3949	0.0049595	0.0096283	0.866166	107	1	-0.3949
Pla2r1	1	0.99489	0.99501	0.999196	16052	0	2.1519	0.005109	0.0050465	0.866166	119	1	2.1519
Nlrp1b	1	0.99489	0.99501	0.999196	16053	0	2.1519	0.005109	0.0050465	0.866166	113	1	2.1519
Mmaa	1	0.99489	0.99501	0.999196	16054	0	2.1519	0.005109	0.0050465	0.866166	112	1	2.1519
Tuba8	1	0.99489	0.99501	0.999196	16055	0	2.1519	0.005109	0.0050465	0.866166	114	1	2.1519
Map3k1	1	0.99489	0.99501	0.999196	16056	0	2.1519	0.005109	0.0050465	0.866166	117	1	2.1519
Rab7l1	1	0.99489	0.99501	0.999196	16057	0	2.1519	0.005109	0.0050465	0.866166	118	1	2.1519
2310030G06Rik	1	0.99489	0.99501	0.999196	16058	0	2.1519	0.005109	0.0050465	0.866166	110	1	2.1519
Ctu1	1	0.99489	0.99501	0.999196	16059	0	2.1519	0.005109	0.0050465	0.866166	116	1	2.1519
Zdhhc19	1	0.99489	0.99501	0.999196	16060	0	2.1519	0.005109	0.0050465	0.866166	109	1	2.1519
mmu-mir-1231	1	0.99489	0.99501	0.999196	16061	0	2.1519	0.005109	0.0050465	0.866166	115	1	2.1519
AU018091	1	0.99489	0.99501	0.999196	16062	0	2.1519	0.005109	0.0050465	0.866166	111	1	2.1519
Dkkl1	1	0.99489	0.99501	0.999196	16063	0	2.1519	0.005109	0.0050465	0.866166	108	1	2.1519
Hyls1	2	0.23399	0.3626	0.921989	4833	1	0.026557	0.0054852	0.0090037	0.866166	122	1	0.026557
mmu-mir-488	2	0.70463	0.70607	0.958804	11515	1	0.52454	0.0054852	0.0090037	0.866166	120	1	0.52454
Vmn2r8	2	0.99512	0.99505	0.999196	16066	0	1.4	0.0054852	0.0090037	0.866166	121	1	1.4
Dicer1	1	0.9942	0.99432	0.999196	16050	0	2.1509	0.0057956	0.0057496	0.866166	123	1	2.1509
Pla2g4f	1	0.99406	0.99419	0.999196	16047	0	2.1464	0.005937	0.0058889	0.866166	124	1	2.1464
Ogfr	3	0.61306	0.7037	0.958804	10641	1	-0.5741	0.0061063	0.011815	0.866166	125	1	-0.5741
Olfr612	1	0.99368	0.9938	0.999196	16038	0	2.6561	0.0063207	0.0062791	0.866166	126	1	2.6561
Cckbr	1	0.99358	0.99368	0.999196	16036	0	2.285	0.0064216	0.006376	0.866166	127	1	2.285
Slc22a16	1	0.99358	0.99368	0.999196	16037	0	2.285	0.0064216	0.006376	0.866166	128	1	2.285
Dynlt1a	3	0.19902	0.3469	0.921989	3816	1	1.0386	0.0065862	0.012746	0.866166	129	2	1.0386
Mitf	2	0.023288	0.042855	0.899505	521	1	-0.65369	0.0072163	0.010564	0.866166	142	1	-0.65369
Slc39a1	2	0.18687	0.29805	0.921989	3711	1	-0.091922	0.0072163	0.010564	0.866166	136	1	-0.091922
Cse1l	2	0.25609	0.38711	0.921989	4949	1	-0.020815	0.0072163	0.010564	0.866166	138	1	-0.020815
Crocc	2	0.29371	0.40931	0.921989	5846	1	0.052424	0.0072163	0.010564	0.866166	135	1	0.052424
Zfp334	2	0.42161	0.48924	0.924505	7314	1	0.0073287	0.0072163	0.010564	0.866166	137	1	0.0073287
C1ql3	2	0.42406	0.49087	0.924505	7321	1	-0.028495	0.0072163	0.010564	0.866166	130	1	-0.028495
Olfr649	2	0.70463	0.70607	0.958804	11558	1	0.47463	0.0072163	0.010564	0.866166	131	1	0.47463
mmu-mir-6358	2	0.78321	0.7827	0.958804	12214	0	0.56009	0.0072163	0.010564	0.866166	141	1	0.56009
Dhcr7	2	0.95642	0.95651	0.994154	15380	0	0.84044	0.0072163	0.010564	0.866166	134	1	0.84044
Ly6h	2	0.95642	0.95651	0.994154	15438	0	0.84044	0.0072163	0.010564	0.866166	139	1	0.84044
Fkbp5	2	0.98083	0.98089	0.998995	15821	0	1.0286	0.0072163	0.010564	0.866166	133	1	1.0286
Pcdhb14	2	0.98411	0.98415	0.998995	15886	0	1.1089	0.0072163	0.010564	0.866166	140	1	1.1089
BC005764	2	0.98475	0.98482	0.998995	15894	0	1.124	0.0072163	0.010564	0.866166	132	1	1.124
Tmsb15a	1	0.99277	0.99283	0.999196	16017	0	2.0361	0.0072294	0.0071785	0.866166	143	1	2.0361
Fbxl2	1	0.99277	0.99283	0.999196	16018	0	2.0361	0.0072294	0.0071785	0.866166	153	1	2.0361
Cenpu	1	0.99277	0.99283	0.999196	16019	0	2.0361	0.0072294	0.0071785	0.866166	154	1	2.0361
Dlx1	1	0.99277	0.99283	0.999196	16020	0	2.0361	0.0072294	0.0071785	0.866166	146	1	2.0361
Olfr314	1	0.99277	0.99283	0.999196	16021	0	2.0361	0.0072294	0.0071785	0.866166	144	1	2.0361
NonTargetingControlGuideForMouse_0552	1	0.99277	0.99283	0.999196	16022	0	2.0361	0.0072294	0.0071785	0.866166	145	1	2.0361
Clca2	1	0.99277	0.99283	0.999196	16023	0	2.0361	0.0072294	0.0071785	0.866166	155	1	2.0361
Mpp7	1	0.99277	0.99283	0.999196	16024	0	2.0361	0.0072294	0.0071785	0.866166	152	1	2.0361
Pnlip	1	0.99277	0.99283	0.999196	16025	0	2.0361	0.0072294	0.0071785	0.866166	147	1	2.0361
H2-Ob	1	0.99277	0.99283	0.999196	16026	0	2.0361	0.0072294	0.0071785	0.866166	150	1	2.0361
Cpa3	1	0.99277	0.99283	0.999196	16027	0	2.0361	0.0072294	0.0071785	0.866166	148	1	2.0361
Cyp17a1	1	0.99277	0.99283	0.999196	16028	0	2.0361	0.0072294	0.0071785	0.866166	151	1	2.0361
Fgf12	1	0.99277	0.99283	0.999196	16029	0	2.0361	0.0072294	0.0071785	0.866166	149	1	2.0361
Nefm	1	0.99277	0.99283	0.999196	16030	0	2.0361	0.0072294	0.0071785	0.866166	156	1	2.0361
Zfp69	1	0.99277	0.99283	0.999196	16031	0	2.0361	0.0072294	0.0071785	0.866166	157	1	2.0361
Dpysl2	3	0.83947	0.84215	0.97445	13894	1	0.76603	0.0079324	0.015214	0.866166	158	2	0.76603
Rhot2	3	0.97617	0.97635	0.998995	15754	0	0.76603	0.0079324	0.015214	0.866166	159	2	0.76603
Elk4	3	0.43495	0.59028	0.924505	7402	2	-1.3099	0.0082165	0.015755	0.866166	160	1	-1.3099
Tsen15	2	0.83561	0.83526	0.973802	13477	0	0.63179	0.0083026	0.011581	0.866166	161	1	0.63179
Pfn3	2	0.70463	0.70607	0.958804	11408	1	0.47253	0.0085439	0.011809	0.866166	162	1	0.47253
Gm13769	2	0.87992	0.87984	0.994154	14208	0	0.63565	0.0085439	0.011809	0.866166	163	1	0.63565
Pxn	2	0.469	0.52137	0.924505	8373	1	0.36623	0.0087851	0.012042	0.866166	164	1	0.36623
Plxnc1	3	0.28443	0.43692	0.921989	5612	2	-1.5716	0.0090597	0.017312	0.866166	165	1	-1.5716
Def6	3	0.9989	0.99894	0.999711	16123	0	0.76209	0.0093269	0.017788	0.866166	166	2	0.76209
Tenm1	4	0.41322	0.60557	0.929842	7285	1	-0.77889	0.0093371	0.017752	0.866166	167	1	-0.77889
Setx	1	0.99065	0.99071	0.998995	15959	0	1.9101	0.0093498	0.0092859	0.866166	176	1	1.9101
Ccser1	1	0.99065	0.99071	0.998995	15960	0	1.9101	0.0093498	0.0092859	0.866166	173	1	1.9101
Ccdc34	1	0.99065	0.99071	0.998995	15961	0	1.9101	0.0093498	0.0092859	0.866166	174	1	1.9101
Cox20	1	0.99065	0.99071	0.998995	15962	0	1.9101	0.0093498	0.0092859	0.866166	169	1	1.9101
Cenpf	1	0.99065	0.99071	0.998995	15963	0	1.9101	0.0093498	0.0092859	0.866166	179	1	1.9101
Usp17lb	1	0.99065	0.99071	0.998995	15964	0	1.9101	0.0093498	0.0092859	0.866166	170	1	1.9101
Serp2	1	0.99065	0.99071	0.998995	15965	0	1.9101	0.0093498	0.0092859	0.866166	189	1	1.9101
Foxj1	1	0.99065	0.99071	0.998995	15966	0	1.9101	0.0093498	0.0092859	0.866166	172	1	1.9101
Nkx2-6	1	0.99065	0.99071	0.998995	15967	0	1.9101	0.0093498	0.0092859	0.866166	192	1	1.9101
NonTargetingControlGuideForMouse_0434	1	0.99065	0.99071	0.998995	15968	0	1.9101	0.0093498	0.0092859	0.866166	181	1	1.9101
Olfr1361	1	0.99065	0.99071	0.998995	15969	0	1.9101	0.0093498	0.0092859	0.866166	186	1	1.9101
Gtse1	1	0.99065	0.99071	0.998995	15970	0	1.9101	0.0093498	0.0092859	0.866166	184	1	1.9101
Pou3f4	1	0.99065	0.99071	0.998995	15971	0	1.9101	0.0093498	0.0092859	0.866166	180	1	1.9101
Nipa2	1	0.99065	0.99071	0.998995	15972	0	1.9101	0.0093498	0.0092859	0.866166	191	1	1.9101
R3hdm2	1	0.99065	0.99071	0.998995	15973	0	1.9101	0.0093498	0.0092859	0.866166	168	1	1.9101
NonTargetingControlGuideForMouse_0264	1	0.99065	0.99071	0.998995	15974	0	1.9101	0.0093498	0.0092859	0.866166	178	1	1.9101
Fam150a	1	0.99065	0.99071	0.998995	15975	0	1.9101	0.0093498	0.0092859	0.866166	188	1	1.9101
Gm609	1	0.99065	0.99071	0.998995	15976	0	1.9101	0.0093498	0.0092859	0.866166	171	1	1.9101
Orc2	1	0.99065	0.99071	0.998995	15977	0	1.9101	0.0093498	0.0092859	0.866166	185	1	1.9101
Cenpb	1	0.99065	0.99071	0.998995	15978	0	1.9101	0.0093498	0.0092859	0.866166	177	1	1.9101
mmu-mir-21c	1	0.99065	0.99071	0.998995	15979	0	1.9101	0.0093498	0.0092859	0.866166	182	1	1.9101
Cmtm5	1	0.99065	0.99071	0.998995	15980	0	1.9101	0.0093498	0.0092859	0.866166	175	1	1.9101
Ccdc148	1	0.99065	0.99071	0.998995	15981	0	1.9101	0.0093498	0.0092859	0.866166	190	1	1.9101
Hspd1	1	0.99065	0.99071	0.998995	15982	0	1.9101	0.0093498	0.0092859	0.866166	187	1	1.9101
Dnm3	1	0.99065	0.99071	0.998995	15983	0	1.9101	0.0093498	0.0092859	0.866166	183	1	1.9101
Dsn1	2	0.0091872	0.01733	0.899505	209	1	-0.99952	0.010192	0.013378	0.866166	198	1	-0.99952
Cbll1	2	0.018732	0.034635	0.899505	417	1	-0.76499	0.010192	0.013378	0.866166	194	1	-0.76499
Rph3al	2	0.2586	0.3885	0.921989	4959	1	-0.07189	0.010192	0.013378	0.866166	200	1	-0.07189
Gm853	2	0.29371	0.40931	0.921989	5812	1	-0.0011984	0.010192	0.013378	0.866166	204	1	-0.0011984
mmu-mir-196a-2	2	0.37145	0.45682	0.921989	6855	1	0.083484	0.010192	0.013378	0.866166	197	1	0.083484
Armc5	2	0.469	0.52137	0.924505	8417	1	0.17945	0.010192	0.013378	0.866166	203	1	0.17945
Bloc1s5	2	0.469	0.52137	0.924505	8431	1	0.17945	0.010192	0.013378	0.866166	202	1	0.17945
Nek5	2	0.469	0.52137	0.924505	8533	1	0.17945	0.010192	0.013378	0.866166	196	1	0.17945
A830010M20Rik	2	0.64879	0.65701	0.958804	10769	1	0.29416	0.010192	0.013378	0.866166	201	1	0.29416
Mcm6	2	0.70463	0.70607	0.958804	11304	1	0.42101	0.010192	0.013378	0.866166	195	1	0.42101
Olfr1228	2	0.70463	0.70607	0.958804	11445	1	0.42101	0.010192	0.013378	0.866166	206	1	0.42101
Atf4	2	0.70463	0.70607	0.958804	11603	1	0.42101	0.010192	0.013378	0.866166	205	1	0.42101
Hnrnph3	2	0.75696	0.7566	0.958804	12045	0	0.30227	0.010192	0.013378	0.866166	193	1	0.30227
Cox5a	2	0.83561	0.83526	0.973802	13680	0	0.58097	0.010192	0.013378	0.866166	199	1	0.58097
Usp45	1	0.98944	0.98953	0.998995	15951	0	1.9047	0.010561	0.010494	0.866166	207	1	1.9047
Olfr744	3	0.26677	0.41845	0.921989	5014	1	0.933	0.010573	0.020059	0.866166	208	2	0.933
Phactr4	3	0.038627	0.095017	0.901639	836	1	-0.99	0.010805	0.020499	0.866166	210	1	-0.99
Dusp1	3	0.72785	0.76399	0.958804	11973	1	0.041769	0.010805	0.020499	0.866166	209	1	0.041769
Zcchc8	3	0.88731	0.8873	0.994154	14324	0	-0.21657	0.010805	0.020499	0.866166	211	1	-0.21657
Tmem213	3	0.93335	0.93355	0.994154	15026	0	-0.57831	0.010805	0.020499	0.866166	212	1	-0.57831
Zfp120	3	0.96265	0.96288	0.995835	15604	0	-0.59431	0.010805	0.020499	0.866166	213	1	-0.59431
mmu-mir-3968	1	0.98914	0.98926	0.998995	15947	0	1.9059	0.010864	0.010788	0.866166	217	1	1.9059
Mkl2	1	0.98914	0.98926	0.998995	15948	0	1.9059	0.010864	0.010788	0.866166	215	1	1.9059
Igfbp2	1	0.98914	0.98926	0.998995	15949	0	1.9059	0.010864	0.010788	0.866166	214	1	1.9059
Npas1	1	0.98914	0.98926	0.998995	15950	0	1.9059	0.010864	0.010788	0.866166	216	1	1.9059
4933411K20Rik	4	0.25027	0.4532	0.921989	4944	3	-1.5506	0.01094	0.020561	0.866166	218	1	-1.5506
Rab15	3	0.61306	0.7037	0.958804	10614	1	0.77454	0.011033	0.020926	0.866166	219	2	0.77454
Fam83f	1	0.98895	0.98908	0.998995	15946	0	2.177	0.011046	0.010971	0.866166	220	1	2.177
Zdhhc16	1	0.98889	0.98902	0.998995	15945	0	2.0365	0.011107	0.011024	0.866166	221	1	2.0365
Col25a1	2	0.83561	0.83526	0.973802	13395	0	0.57997	0.011638	0.014792	0.866166	222	1	0.57997
Trim36	2	0.83561	0.83526	0.973802	13574	0	0.57887	0.0122	0.0153	0.866166	223	1	0.57887
Gnpnat1	2	0.99414	0.99412	0.999196	16048	0	1.3334	0.0122	0.0153	0.866166	224	1	1.3334
Nsun6	2	0.83561	0.83526	0.973802	13825	0	0.68479	0.012441	0.015525	0.866166	225	1	0.68479
Kcns3	2	0.58004	0.6017	0.924505	9377	1	0.39377	0.012521	0.015607	0.866166	226	1	0.39377
Il3ra	2	0.98676	0.98681	0.998995	15906	0	1.22	0.012682	0.015749	0.866166	227	1	1.22
Prss46	1	0.9873	0.9874	0.998995	15907	0	1.772	0.012702	0.012595	0.866166	228	1	1.772
Rab5c	1	0.9873	0.9874	0.998995	15908	0	1.772	0.012702	0.012595	0.866166	249	1	1.772
Cib2	1	0.9873	0.9874	0.998995	15909	0	1.772	0.012702	0.012595	0.866166	243	1	1.772
Polr3h	1	0.9873	0.9874	0.998995	15910	0	1.772	0.012702	0.012595	0.866166	235	1	1.772
Tnfrsf9	1	0.9873	0.9874	0.998995	15911	0	1.772	0.012702	0.012595	0.866166	239	1	1.772
Kctd6	1	0.9873	0.9874	0.998995	15912	0	1.772	0.012702	0.012595	0.866166	246	1	1.772
mmu-mir-7213	1	0.9873	0.9874	0.998995	15913	0	1.772	0.012702	0.012595	0.866166	248	1	1.772
Cisd3	1	0.9873	0.9874	0.998995	15914	0	1.772	0.012702	0.012595	0.866166	245	1	1.772
mmu-mir-1971	1	0.9873	0.9874	0.998995	15915	0	1.772	0.012702	0.012595	0.866166	244	1	1.772
Odam	1	0.9873	0.9874	0.998995	15916	0	1.772	0.012702	0.012595	0.866166	241	1	1.772
Poc1b	1	0.9873	0.9874	0.998995	15917	0	1.772	0.012702	0.012595	0.866166	242	1	1.772
Bank1	1	0.9873	0.9874	0.998995	15918	0	1.772	0.012702	0.012595	0.866166	247	1	1.772
Gm17677	1	0.9873	0.9874	0.998995	15919	0	1.772	0.012702	0.012595	0.866166	240	1	1.772
Dctn3	1	0.9873	0.9874	0.998995	15920	0	1.772	0.012702	0.012595	0.866166	232	1	1.772
Vmn1r49	1	0.9873	0.9874	0.998995	15921	0	1.772	0.012702	0.012595	0.866166	238	1	1.772
BC100530	1	0.9873	0.9874	0.998995	15922	0	1.772	0.012702	0.012595	0.866166	237	1	1.772
Atp8b1	1	0.9873	0.9874	0.998995	15923	0	1.772	0.012702	0.012595	0.866166	234	1	1.772
Med20	1	0.9873	0.9874	0.998995	15924	0	1.772	0.012702	0.012595	0.866166	236	1	1.772
Col6a5	1	0.9873	0.9874	0.998995	15925	0	1.772	0.012702	0.012595	0.866166	231	1	1.772
NonTargetingControlGuideForMouse_0723	1	0.9873	0.9874	0.998995	15926	0	1.772	0.012702	0.012595	0.866166	233	1	1.772
Fmo9	1	0.9873	0.9874	0.998995	15927	0	1.772	0.012702	0.012595	0.866166	230	1	1.772
Ankrd66	1	0.9873	0.9874	0.998995	15928	0	1.772	0.012702	0.012595	0.866166	229	1	1.772
Idh2	1	0.9873	0.9874	0.998995	15929	0	1.772	0.012702	0.012595	0.866166	250	1	1.772
Sohlh2	3	0.28443	0.43692	0.921989	5650	2	-1.5716	0.012788	0.022519	0.866166	251	1	-1.5716
Sprr2a1	5	0.88571	0.92274	0.994154	14312	1	0.035952	0.014222	0.027116	0.866166	252	2	0.035952
Pdzk1ip1	2	0.41279	0.48338	0.924505	7280	1	-0.14052	0.014407	0.017353	0.866166	263	1	-0.14052
Shkbp1	2	0.41829	0.48709	0.924505	7299	1	0.1839	0.014407	0.017353	0.866166	266	1	0.1839
Vmn1r55	2	0.58004	0.6017	0.924505	9397	1	0.23223	0.014407	0.017353	0.866166	257	1	0.23223
Msr1	2	0.70463	0.70607	0.958804	11514	1	0.36308	0.014407	0.017353	0.866166	256	1	0.36308
Mrgprg	2	0.70463	0.70607	0.958804	11567	1	0.36308	0.014407	0.017353	0.866166	254	1	0.36308
Rnf40	2	0.70463	0.70607	0.958804	11585	1	0.36308	0.014407	0.017353	0.866166	261	1	0.36308
Psmd7	2	0.76427	0.76377	0.958804	12087	0	0.29677	0.014407	0.017353	0.866166	267	1	0.29677
mmu-mir-3535	2	0.77493	0.77453	0.958804	12161	0	0.37895	0.014407	0.017353	0.866166	253	1	0.37895
Nenf	2	0.83561	0.83526	0.973802	13404	0	0.52304	0.014407	0.017353	0.866166	265	1	0.52304
Acp6	2	0.8828	0.88263	0.994154	14251	0	0.5132	0.014407	0.017353	0.866166	255	1	0.5132
Zbtb12	2	0.9036	0.90343	0.994154	14602	0	0.70134	0.014407	0.017353	0.866166	264	1	0.70134
Lepre1	2	0.91287	0.91278	0.994154	14741	0	0.75965	0.014407	0.017353	0.866166	258	1	0.75965
Olfr293	2	0.95642	0.95651	0.994154	15436	0	0.72889	0.014407	0.017353	0.866166	260	1	0.72889
Slc23a3	2	0.98266	0.98267	0.998995	15872	0	0.96345	0.014407	0.017353	0.866166	259	1	0.96345
Tmem150c	2	0.98825	0.98827	0.998995	15937	0	1.0285	0.014407	0.017353	0.866166	262	1	1.0285
Sipa1	1	0.98528	0.98539	0.998995	15899	0	1.7678	0.014721	0.014596	0.866166	269	1	1.7678
NonTargetingControlGuideForMouse_0507	1	0.98528	0.98539	0.998995	15900	0	1.7678	0.014721	0.014596	0.866166	270	1	1.7678
Nacc2	1	0.98528	0.98539	0.998995	15901	0	1.7678	0.014721	0.014596	0.866166	268	1	1.7678
Arsi	1	0.98504	0.98513	0.998995	15898	0	1.7672	0.014964	0.01486	0.866166	271	1	1.7672
Ccr2	1	0.985	0.98509	0.998995	15897	0	2.3912	0.015004	0.014897	0.866166	272	1	2.3912
Magea10	1	0.98485	0.98494	0.998995	15895	0	1.9431	0.015145	0.015046	0.866166	273	1	1.9431
mmu-mir-704	3	0.068279	0.15835	0.901639	1488	2	-2.1543	0.015249	0.024708	0.866166	278	1	-2.1543
Uso1	3	0.14498	0.28881	0.921989	3021	2	-2.0451	0.015249	0.024708	0.866166	277	1	-2.0451
Prps1l3	3	0.14552	0.28941	0.921989	3042	2	-1.5716	0.015249	0.024708	0.866166	274	1	-1.5716
mmu-mir-7229	3	0.26677	0.41845	0.921989	5000	1	-0.99	0.015249	0.024708	0.866166	275	1	-0.99
Atp2a2	3	0.34805	0.50259	0.924505	6129	2	-1.635	0.015249	0.024708	0.866166	276	1	-1.635
Tomt	4	0.23111	0.4274	0.921989	4663	1	0.00040799	0.015314	0.028392	0.866166	279	2	0.00040799
Espnl	4	0.82364	0.86348	0.991382	13364	1	-0.27068	0.015314	0.028392	0.866166	280	2	-0.27068
Rtca	1	0.98467	0.98478	0.998995	15893	0	2.0435	0.015327	0.015231	0.866166	281	1	2.0435
Chil6	1	0.98457	0.98469	0.998995	15891	0	1.8433	0.015428	0.01533	0.866166	282	1	1.8433
Casd1	2	0.9828	0.9828	0.998995	15873	0	0.93549	0.01609	0.018912	0.866166	283	1	0.93549
Hdc	2	0.469	0.52137	0.924505	8335	1	0.20688	0.01629	0.019095	0.866166	285	1	0.20688
Notch3	2	0.58004	0.6017	0.924505	9372	1	0.3176	0.01629	0.019095	0.866166	284	1	0.3176
Zfp623	2	0.99571	0.99568	0.999584	16073	0	1.604	0.01645	0.019242	0.866166	286	1	1.604
mmu-mir-448	1	0.98259	0.98274	0.998995	15830	0	1.6194	0.017407	0.017363	0.866166	315	1	1.6194
Riok1	1	0.98259	0.98274	0.998995	15831	0	1.6194	0.017407	0.017363	0.866166	308	1	1.6194
Lyzl1	1	0.98259	0.98274	0.998995	15832	0	1.6194	0.017407	0.017363	0.866166	306	1	1.6194
Kdelc1	1	0.98259	0.98274	0.998995	15833	0	1.6194	0.017407	0.017363	0.866166	323	1	1.6194
Rpl27a	1	0.98259	0.98274	0.998995	15834	0	1.6194	0.017407	0.017363	0.866166	289	1	1.6194
Pgpep1l	1	0.98259	0.98274	0.998995	15835	0	1.6194	0.017407	0.017363	0.866166	324	1	1.6194
Tmem41b	1	0.98259	0.98274	0.998995	15836	0	1.6194	0.017407	0.017363	0.866166	303	1	1.6194
Slc18a2	1	0.98259	0.98274	0.998995	15837	0	1.6194	0.017407	0.017363	0.866166	305	1	1.6194
Ltk	1	0.98259	0.98274	0.998995	15838	0	1.6194	0.017407	0.017363	0.866166	314	1	1.6194
Abt1	1	0.98259	0.98274	0.998995	15839	0	1.6194	0.017407	0.017363	0.866166	304	1	1.6194
mmu-mir-7044	1	0.98259	0.98274	0.998995	15840	0	1.6194	0.017407	0.017363	0.866166	322	1	1.6194
Actl7b	1	0.98259	0.98274	0.998995	15841	0	1.6194	0.017407	0.017363	0.866166	307	1	1.6194
Brat1	1	0.98259	0.98274	0.998995	15842	0	1.6194	0.017407	0.017363	0.866166	313	1	1.6194
H2-Ea-ps	1	0.98259	0.98274	0.998995	15843	0	1.6194	0.017407	0.017363	0.866166	312	1	1.6194
Skp1a	1	0.98259	0.98274	0.998995	15844	0	1.6194	0.017407	0.017363	0.866166	311	1	1.6194
mmu-mir-6994	1	0.98259	0.98274	0.998995	15845	0	1.6194	0.017407	0.017363	0.866166	309	1	1.6194
mmu-mir-1843a	1	0.98259	0.98274	0.998995	15846	0	1.6194	0.017407	0.017363	0.866166	310	1	1.6194
Rdh14	1	0.98259	0.98274	0.998995	15847	0	1.6194	0.017407	0.017363	0.866166	327	1	1.6194
Wdr53	1	0.98259	0.98274	0.998995	15848	0	1.6194	0.017407	0.017363	0.866166	318	1	1.6194
Olfr644	1	0.98259	0.98274	0.998995	15849	0	1.6194	0.017407	0.017363	0.866166	317	1	1.6194
Eif3d	1	0.98259	0.98274	0.998995	15850	0	1.6194	0.017407	0.017363	0.866166	287	1	1.6194
Ocm	1	0.98259	0.98274	0.998995	15851	0	1.6194	0.017407	0.017363	0.866166	293	1	1.6194
Ccdc69	1	0.98259	0.98274	0.998995	15852	0	1.6194	0.017407	0.017363	0.866166	292	1	1.6194
mmu-mir-6244	1	0.98259	0.98274	0.998995	15853	0	1.6194	0.017407	0.017363	0.866166	321	1	1.6194
Pax5	1	0.98259	0.98274	0.998995	15854	0	1.6194	0.017407	0.017363	0.866166	325	1	1.6194
Rps27rt	1	0.98259	0.98274	0.998995	15855	0	1.6194	0.017407	0.017363	0.866166	326	1	1.6194
Olfr870	1	0.98259	0.98274	0.998995	15856	0	1.6194	0.017407	0.017363	0.866166	316	1	1.6194
Kcng1	1	0.98259	0.98274	0.998995	15857	0	1.6194	0.017407	0.017363	0.866166	319	1	1.6194
Dpy19l3	1	0.98259	0.98274	0.998995	15858	0	1.6194	0.017407	0.017363	0.866166	320	1	1.6194
Gm7616	1	0.98259	0.98274	0.998995	15859	0	1.6194	0.017407	0.017363	0.866166	291	1	1.6194
Tmem67	1	0.98259	0.98274	0.998995	15860	0	1.6194	0.017407	0.017363	0.866166	301	1	1.6194
Bola3	1	0.98259	0.98274	0.998995	15861	0	1.6194	0.017407	0.017363	0.866166	299	1	1.6194
mmu-mir-1982	1	0.98259	0.98274	0.998995	15862	0	1.6194	0.017407	0.017363	0.866166	300	1	1.6194
mmu-mir-380	1	0.98259	0.98274	0.998995	15863	0	1.6194	0.017407	0.017363	0.866166	296	1	1.6194
Parp4	1	0.98259	0.98274	0.998995	15864	0	1.6194	0.017407	0.017363	0.866166	297	1	1.6194
Ubqln1	1	0.98259	0.98274	0.998995	15865	0	1.6194	0.017407	0.017363	0.866166	302	1	1.6194
Smarce1	1	0.98259	0.98274	0.998995	15866	0	1.6194	0.017407	0.017363	0.866166	298	1	1.6194
Rcvrn	1	0.98259	0.98274	0.998995	15867	0	1.6194	0.017407	0.017363	0.866166	290	1	1.6194
Mapk14	1	0.98259	0.98274	0.998995	15868	0	1.6194	0.017407	0.017363	0.866166	288	1	1.6194
Plac8	1	0.98259	0.98274	0.998995	15869	0	1.6194	0.017407	0.017363	0.866166	294	1	1.6194
Hoxa5	1	0.98259	0.98274	0.998995	15870	0	1.6194	0.017407	0.017363	0.866166	295	1	1.6194
Olfr523	3	0.40643	0.56183	0.924505	7184	1	-0.8465	0.017705	0.026921	0.866166	329	1	-0.8465
Rab37	3	0.83947	0.84215	0.97445	13892	1	0.44108	0.017705	0.026921	0.866166	328	1	0.44108
Ecm1	3	0.54988	0.67549	0.958804	9138	1	-0.99	0.018244	0.027381	0.866166	330	1	-0.99
Psca	3	0.72785	0.76399	0.958804	11951	1	-0.57831	0.018244	0.027381	0.866166	331	1	-0.57831
1700013G24Rik	2	0.37145	0.45682	0.921989	6831	1	-0.037439	0.018612	0.021259	0.866166	339	1	-0.037439
Kcnd2	2	0.37145	0.45682	0.921989	6841	1	-0.037439	0.018612	0.021259	0.866166	344	1	-0.037439
Dpp8	2	0.37145	0.45682	0.921989	6852	1	-0.037439	0.018612	0.021259	0.866166	334	1	-0.037439
Olfr221	2	0.37145	0.45682	0.921989	6909	1	-0.037439	0.018612	0.021259	0.866166	348	1	-0.037439
Srp19	2	0.37145	0.45682	0.921989	6956	1	-0.037439	0.018612	0.021259	0.866166	340	1	-0.037439
Rictor	2	0.58004	0.6017	0.924505	9474	1	0.16924	0.018612	0.021259	0.866166	345	1	0.16924
Grhpr	2	0.58004	0.6017	0.924505	9521	1	0.16924	0.018612	0.021259	0.866166	336	1	0.16924
Fam193a	2	0.58004	0.6017	0.924505	9528	1	0.16924	0.018612	0.021259	0.866166	338	1	0.16924
Cyp20a1	2	0.70463	0.70607	0.958804	11650	1	0.30009	0.018612	0.021259	0.866166	335	1	0.30009
Pdia4	2	0.75976	0.75927	0.958804	12061	0	0.31447	0.018612	0.021259	0.866166	333	1	0.31447
Eif4a1	2	0.83561	0.83526	0.973802	13695	0	0.46005	0.018612	0.021259	0.866166	346	1	0.46005
Pold2	2	0.83561	0.83526	0.973802	13758	0	0.46005	0.018612	0.021259	0.866166	341	1	0.46005
Scyl1	2	0.92111	0.92095	0.994154	14846	0	0.75959	0.018612	0.021259	0.866166	343	1	0.75959
Trps1	2	0.95642	0.95651	0.994154	15307	0	0.6659	0.018612	0.021259	0.866166	342	1	0.6659
Rhox10	2	0.95642	0.95651	0.994154	15410	0	0.6659	0.018612	0.021259	0.866166	332	1	0.6659
Crebl2	2	0.95642	0.95651	0.994154	15495	0	0.6659	0.018612	0.021259	0.866166	347	1	0.6659
Trmt10c	2	0.9938	0.9938	0.999196	16040	0	1.282	0.018612	0.021259	0.866166	337	1	1.282
Pate2	1	0.98063	0.98075	0.998995	15819	0	1.6187	0.019366	0.01937	0.866166	349	1	1.6187
Ppp1r3g	1	0.98059	0.98071	0.998995	15817	0	2.3614	0.019406	0.019403	0.866166	350	1	2.3614
Phf20	1	0.98049	0.98061	0.998995	15813	0	1.6143	0.019507	0.019519	0.866166	353	1	1.6143
Acrv1	1	0.98049	0.98061	0.998995	15814	0	1.6143	0.019507	0.019519	0.866166	352	1	1.6143
Ifrd1	1	0.98049	0.98061	0.998995	15815	0	1.6143	0.019507	0.019519	0.866166	351	1	1.6143
Ctcf	1	0.98039	0.98051	0.998995	15812	0	1.9859	0.019608	0.019615	0.866166	354	1	1.9859
Prune	1	0.98015	0.98027	0.998995	15808	0	1.6152	0.019851	0.019855	0.866166	357	1	1.6152
1700003M02Rik	1	0.98015	0.98027	0.998995	15809	0	1.6152	0.019851	0.019855	0.866166	356	1	1.6152
Gnrhr	1	0.98015	0.98027	0.998995	15810	0	1.6152	0.019851	0.019855	0.866166	355	1	1.6152
Npm2	1	0.98015	0.98027	0.998995	15811	0	1.6152	0.019851	0.019855	0.866166	358	1	1.6152
Fam151a	1	0.97977	0.97988	0.998995	15805	0	1.736	0.020234	0.020234	0.866166	359	1	1.736
Pqlc3	1	0.97971	0.97984	0.998995	15804	0	1.9625	0.020295	0.020294	0.866166	360	1	1.9625
NonTargetingControlGuideForMouse_0296	1	0.97966	0.9798	0.998995	15803	0	1.8042	0.020335	0.020331	0.866166	361	1	1.8042
Gpr33	1	0.97962	0.97976	0.998995	15802	0	1.9799	0.020376	0.020368	0.866166	362	1	1.9799
Xrcc1	2	0.99512	0.99505	0.999196	16065	0	1.1729	0.021011	0.02355	0.866166	364	1	1.1729
Fbxo16	2	0.99512	0.99505	0.999196	16069	0	1.1729	0.021011	0.02355	0.866166	363	1	1.1729
Kifc3	2	0.95642	0.95651	0.994154	15522	0	0.83147	0.021251	0.023776	0.866166	365	1	0.83147
Ptcd2	3	0.18088	0.32765	0.921989	3660	2	-1.7931	0.021532	0.030392	0.866166	370	1	-1.7931
mmu-mir-221	3	0.28443	0.43692	0.921989	5596	2	-1.5716	0.021532	0.030392	0.866166	369	1	-1.5716
Lactb	3	0.28443	0.43692	0.921989	5641	2	-1.5716	0.021532	0.030392	0.866166	368	1	-1.5716
Med27	3	0.40643	0.56183	0.924505	7212	1	-0.10135	0.021532	0.030392	0.866166	367	1	-0.10135
Hscb	3	0.83947	0.84215	0.97445	13921	1	-0.99	0.021532	0.030392	0.866166	366	1	-0.99
Olfr980	2	0.017091	0.031712	0.899505	402	1	-0.91521	0.021611	0.024118	0.866166	374	1	-0.91521
Prkab2	2	0.76215	0.76165	0.958804	12072	0	0.21244	0.021611	0.024118	0.866166	371	1	0.21244
Ifne	2	0.83561	0.83526	0.973802	13518	0	0.45795	0.021611	0.024118	0.866166	373	1	0.45795
Gm5148	2	0.83561	0.83526	0.973802	13816	0	0.45795	0.021611	0.024118	0.866166	372	1	0.45795
Olfr362	2	0.37145	0.45682	0.921989	6916	1	0.025747	0.02209	0.0246	0.866166	375	1	0.025747
Olfr1418	1	0.97756	0.97767	0.998995	15758	0	1.4486	0.022435	0.0224	0.866166	386	1	1.4486
Zfp809	1	0.97756	0.97767	0.998995	15759	0	1.4486	0.022435	0.0224	0.866166	380	1	1.4486
Hnrnpdl	1	0.97756	0.97767	0.998995	15760	0	1.4486	0.022435	0.0224	0.866166	403	1	1.4486
Rslcan18	1	0.97756	0.97767	0.998995	15761	0	1.4486	0.022435	0.0224	0.866166	382	1	1.4486
Hsd11b1	1	0.97756	0.97767	0.998995	15762	0	1.4486	0.022435	0.0224	0.866166	381	1	1.4486
Sdr16c6	1	0.97756	0.97767	0.998995	15763	0	1.4486	0.022435	0.0224	0.866166	406	1	1.4486
N4bp1	1	0.97756	0.97767	0.998995	15764	0	1.4486	0.022435	0.0224	0.866166	393	1	1.4486
Helb	1	0.97756	0.97767	0.998995	15765	0	1.4486	0.022435	0.0224	0.866166	402	1	1.4486
Prr14	1	0.97756	0.97767	0.998995	15766	0	1.4486	0.022435	0.0224	0.866166	408	1	1.4486
Proca1	1	0.97756	0.97767	0.998995	15767	0	1.4486	0.022435	0.0224	0.866166	389	1	1.4486
Pik3c3	1	0.97756	0.97767	0.998995	15768	0	1.4486	0.022435	0.0224	0.866166	388	1	1.4486
Fxyd1	1	0.97756	0.97767	0.998995	15769	0	1.4486	0.022435	0.0224	0.866166	384	1	1.4486
Ggta1	1	0.97756	0.97767	0.998995	15770	0	1.4486	0.022435	0.0224	0.866166	387	1	1.4486
Krt20	1	0.97756	0.97767	0.998995	15771	0	1.4486	0.022435	0.0224	0.866166	376	1	1.4486
Arid1b	1	0.97756	0.97767	0.998995	15772	0	1.4486	0.022435	0.0224	0.866166	379	1	1.4486
Saa3	1	0.97756	0.97767	0.998995	15773	0	1.4486	0.022435	0.0224	0.866166	383	1	1.4486
Olfr108	1	0.97756	0.97767	0.998995	15774	0	1.4486	0.022435	0.0224	0.866166	377	1	1.4486
Plod1	1	0.97756	0.97767	0.998995	15775	0	1.4486	0.022435	0.0224	0.866166	401	1	1.4486
Tmlhe	1	0.97756	0.97767	0.998995	15776	0	1.4486	0.022435	0.0224	0.866166	400	1	1.4486
C4b	1	0.97756	0.97767	0.998995	15777	0	1.4486	0.022435	0.0224	0.866166	407	1	1.4486
Lrrc51	1	0.97756	0.97767	0.998995	15778	0	1.4486	0.022435	0.0224	0.866166	405	1	1.4486
Spam1	1	0.97756	0.97767	0.998995	15779	0	1.4486	0.022435	0.0224	0.866166	390	1	1.4486
A430005L14Rik	1	0.97756	0.97767	0.998995	15780	0	1.4486	0.022435	0.0224	0.866166	385	1	1.4486
C1qtnf9	1	0.97756	0.97767	0.998995	15781	0	1.4486	0.022435	0.0224	0.866166	404	1	1.4486
NonTargetingControlGuideForMouse_0153	1	0.97756	0.97767	0.998995	15782	0	1.4486	0.022435	0.0224	0.866166	378	1	1.4486
Crlf3	1	0.97756	0.97767	0.998995	15783	0	1.4486	0.022435	0.0224	0.866166	399	1	1.4486
Clec9a	1	0.97756	0.97767	0.998995	15784	0	1.4486	0.022435	0.0224	0.866166	397	1	1.4486
Xpr1	1	0.97756	0.97767	0.998995	15785	0	1.4486	0.022435	0.0224	0.866166	395	1	1.4486
Mcoln3	1	0.97756	0.97767	0.998995	15786	0	1.4486	0.022435	0.0224	0.866166	398	1	1.4486
Shmt1	1	0.97756	0.97767	0.998995	15787	0	1.4486	0.022435	0.0224	0.866166	391	1	1.4486
C030046E11Rik	1	0.97756	0.97767	0.998995	15788	0	1.4486	0.022435	0.0224	0.866166	394	1	1.4486
5830403L16Rik	1	0.97756	0.97767	0.998995	15789	0	1.4486	0.022435	0.0224	0.866166	396	1	1.4486
Tep1	1	0.97756	0.97767	0.998995	15790	0	1.4486	0.022435	0.0224	0.866166	392	1	1.4486
Oc90	4	0.71804	0.82302	0.973802	11844	1	-0.78415	0.023537	0.040793	0.866166	409	1	-0.78415
Bid	4	0.12225	0.27069	0.921989	2413	2	-0.94457	0.024251	0.04137	0.866166	410	1	-0.94457
BC021785	1	0.97542	0.97553	0.998995	15752	0	1.4437	0.024576	0.024465	0.866166	411	1	1.4437
Cacng4	1	0.975	0.97509	0.998995	15745	0	1.4444	0.025	0.024918	0.866166	418	1	1.4444
mmu-mir-687	1	0.975	0.97509	0.998995	15746	0	1.4444	0.025	0.024918	0.866166	417	1	1.4444
Plekhs1	1	0.975	0.97509	0.998995	15747	0	1.4444	0.025	0.024918	0.866166	413	1	1.4444
Tubgcp4	1	0.975	0.97509	0.998995	15748	0	1.4444	0.025	0.024918	0.866166	412	1	1.4444
Oaf	1	0.975	0.97509	0.998995	15749	0	1.4444	0.025	0.024918	0.866166	414	1	1.4444
Acss1	1	0.975	0.97509	0.998995	15750	0	1.4444	0.025	0.024918	0.866166	415	1	1.4444
Abca7	1	0.975	0.97509	0.998995	15751	0	1.4444	0.025	0.024918	0.866166	416	1	1.4444
mmu-mir-196a-1	2	0.18687	0.29805	0.921989	3708	1	-0.33549	0.025243	0.027608	0.866166	433	1	-0.33549
D19Bwg1357e	2	0.23399	0.3626	0.921989	4759	1	-0.26692	0.025243	0.027608	0.866166	445	1	-0.26692
Olfr661	2	0.25936	0.38892	0.921989	4965	1	-0.55717	0.025243	0.027608	0.866166	440	1	-0.55717
Usp17la	2	0.29371	0.40931	0.921989	5814	1	-0.19115	0.025243	0.027608	0.866166	458	1	-0.19115
Zbtb20	2	0.37145	0.45682	0.921989	6881	1	-0.10646	0.025243	0.027608	0.866166	443	1	-0.10646
Asun	2	0.469	0.52137	0.924505	8327	1	-0.010501	0.025243	0.027608	0.866166	427	1	-0.010501
Idi1	2	0.469	0.52137	0.924505	8370	1	-0.010501	0.025243	0.027608	0.866166	446	1	-0.010501
Uap1	2	0.469	0.52137	0.924505	8460	1	-0.010501	0.025243	0.027608	0.866166	424	1	-0.010501
Relt	2	0.58004	0.6017	0.924505	9366	1	0.10022	0.025243	0.027608	0.866166	462	1	0.10022
Gpr26	2	0.58004	0.6017	0.924505	9448	1	0.10022	0.025243	0.027608	0.866166	447	1	0.10022
Ctss	2	0.64793	0.65628	0.958804	10762	1	0.10253	0.025243	0.027608	0.866166	434	1	0.10253
Frrs1	2	0.70463	0.70607	0.958804	11302	1	0.23106	0.025243	0.027608	0.866166	436	1	0.23106
Trpm6	2	0.70463	0.70607	0.958804	11321	1	0.23106	0.025243	0.027608	0.866166	441	1	0.23106
Creb3l3	2	0.70463	0.70607	0.958804	11396	1	0.23106	0.025243	0.027608	0.866166	460	1	0.23106
Olfr723	2	0.70463	0.70607	0.958804	11402	1	0.23106	0.025243	0.027608	0.866166	452	1	0.23106
Cd34	2	0.70463	0.70607	0.958804	11471	1	0.23106	0.025243	0.027608	0.866166	449	1	0.23106
Dpp4	2	0.70463	0.70607	0.958804	11504	1	0.23106	0.025243	0.027608	0.866166	453	1	0.23106
Ccdc122	2	0.70463	0.70607	0.958804	11592	1	0.23106	0.025243	0.027608	0.866166	421	1	0.23106
Gm4952	2	0.70463	0.70607	0.958804	11632	1	0.23106	0.025243	0.027608	0.866166	455	1	0.23106
Hrasls5	2	0.77787	0.77745	0.958804	12182	0	0.27485	0.025243	0.027608	0.866166	439	1	0.27485
Lacc1	2	0.83561	0.83526	0.973802	13414	0	0.39102	0.025243	0.027608	0.866166	444	1	0.39102
Supt4a	2	0.83561	0.83526	0.973802	13422	0	0.39102	0.025243	0.027608	0.866166	461	1	0.39102
Car8	2	0.83561	0.83526	0.973802	13431	0	0.39102	0.025243	0.027608	0.866166	454	1	0.39102
Vmn1r2	2	0.83561	0.83526	0.973802	13438	0	0.68748	0.025243	0.027608	0.866166	429	1	0.68748
Olfr126	2	0.83561	0.83526	0.973802	13451	0	0.39102	0.025243	0.027608	0.866166	430	1	0.39102
Psmb7	2	0.83561	0.83526	0.973802	13558	0	0.39102	0.025243	0.027608	0.866166	450	1	0.39102
Palld	2	0.83561	0.83526	0.973802	13629	0	0.39102	0.025243	0.027608	0.866166	420	1	0.39102
Isoc2b	2	0.83561	0.83526	0.973802	13667	0	0.39102	0.025243	0.027608	0.866166	431	1	0.39102
H2-Q4	2	0.83561	0.83526	0.973802	13678	0	0.39102	0.025243	0.027608	0.866166	451	1	0.39102
Zfp273	2	0.83561	0.83526	0.973802	13783	0	0.39102	0.025243	0.027608	0.866166	422	1	0.39102
Olfr353	2	0.83561	0.83526	0.973802	13792	0	0.39102	0.025243	0.027608	0.866166	428	1	0.39102
Mzt1	2	0.83561	0.83526	0.973802	13798	0	0.39102	0.025243	0.027608	0.866166	423	1	0.39102
Bpifa2	2	0.83561	0.83526	0.973802	13819	0	0.39102	0.025243	0.027608	0.866166	437	1	0.39102
Rnf19b	2	0.89209	0.89187	0.994154	14466	0	0.4691	0.025243	0.027608	0.866166	432	1	0.4691
Slc7a11	2	0.89525	0.89506	0.994154	14484	0	0.52973	0.025243	0.027608	0.866166	419	1	0.52973
Rpl12	2	0.89583	0.89565	0.994154	14487	0	0.49219	0.025243	0.027608	0.866166	426	1	0.49219
Ifitm3	2	0.9052	0.905	0.994154	14627	0	0.58868	0.025243	0.027608	0.866166	438	1	0.58868
Pttg1	2	0.90965	0.9095	0.994154	14692	0	0.60951	0.025243	0.027608	0.866166	448	1	0.60951
B3gnt2	2	0.91604	0.91594	0.994154	14779	0	0.65608	0.025243	0.027608	0.866166	442	1	0.65608
Dok4	2	0.98221	0.98223	0.998995	15827	0	0.81832	0.025243	0.027608	0.866166	435	1	0.81832
Pfpl	2	0.98361	0.98366	0.998995	15883	0	0.82712	0.025243	0.027608	0.866166	456	1	0.82712
Grm1	2	0.98825	0.98827	0.998995	15944	0	0.89653	0.025243	0.027608	0.866166	459	1	0.89653
2310035C23Rik	2	0.99382	0.99382	0.999196	16042	0	1.1356	0.025243	0.027608	0.866166	425	1	1.1356
Ppm1j	2	0.99512	0.99505	0.999196	16070	0	1.1066	0.025243	0.027608	0.866166	457	1	1.1066
Vmn1r101	1	0.9746	0.9747	0.998995	15744	0	1.6211	0.025404	0.025324	0.866166	463	1	1.6211
Trib3	1	0.97452	0.97461	0.998995	15743	0	1.7166	0.025485	0.025407	0.866166	464	1	1.7166
Nr1d2	1	0.97437	0.97448	0.998994	15742	0	1.6202	0.025626	0.025553	0.866166	465	1	1.6202
Sp140	1	0.97425	0.97437	0.998946	15741	0	1.7612	0.025747	0.025668	0.866166	466	1	1.7612
Adck1	1	0.97413	0.97426	0.998894	15740	0	1.6232	0.025868	0.025782	0.866166	467	1	1.6232
Cox6b1	1	0.97401	0.97413	0.99883	15739	0	1.6939	0.025989	0.025906	0.866166	468	1	1.6939
Zbtb26	1	0.97383	0.97396	0.998713	15737	0	1.4942	0.026171	0.026087	0.866166	469	1	1.4942
Hexa	1	0.97383	0.97396	0.998713	15738	0	1.4942	0.026171	0.026087	0.866166	470	1	1.4942
Ccdc42	3	0.042823	0.10435	0.901639	912	2	-2.3059	0.027788	0.035916	0.866166	473	1	-2.3059
Tmem25	3	0.10906	0.23797	0.921989	2333	1	-0.57831	0.027788	0.035916	0.866166	474	1	-0.57831
Rasd2	3	0.34443	0.49895	0.924505	6125	2	-1.8938	0.027788	0.035916	0.866166	475	1	-1.8938
4930591A17Rik	3	0.72785	0.76399	0.958804	11924	1	-0.99	0.027788	0.035916	0.866166	476	1	-0.99
Immp2l	3	0.77648	0.79467	0.962001	12171	1	0.75378	0.027788	0.035916	0.866166	472	1	0.75378
Urod	3	0.93335	0.93355	0.994154	15063	0	-0.57831	0.027788	0.035916	0.866166	471	1	-0.57831
Clic6	2	0.37145	0.45682	0.921989	6834	1	-0.10908	0.028549	0.030713	0.866166	478	1	-0.10908
Gm5128	2	0.58004	0.6017	0.924505	9237	1	0.097598	0.028549	0.030713	0.866166	479	1	0.097598
Ccdc178	2	0.91122	0.91111	0.994154	14709	0	0.60937	0.028549	0.030713	0.866166	477	1	0.60937
Zfp330	1	0.9708	0.97097	0.996538	15666	0	1.2549	0.0292	0.029129	0.866166	536	1	1.2549
Usp18	1	0.9708	0.97097	0.996538	15667	0	1.2549	0.0292	0.029129	0.866166	507	1	1.2549
Znfx1	1	0.9708	0.97097	0.996538	15668	0	1.2549	0.0292	0.029129	0.866166	504	1	1.2549
St7l	1	0.9708	0.97097	0.996538	15669	0	1.2549	0.0292	0.029129	0.866166	501	1	1.2549
Pmepa1	1	0.9708	0.97097	0.996538	15670	0	1.2549	0.0292	0.029129	0.866166	505	1	1.2549
Cyp1a1	1	0.9708	0.97097	0.996538	15671	0	1.2549	0.0292	0.029129	0.866166	493	1	1.2549
Atg10	1	0.9708	0.97097	0.996538	15672	0	1.2549	0.0292	0.029129	0.866166	494	1	1.2549
Klra3	1	0.9708	0.97097	0.996538	15673	0	1.2549	0.0292	0.029129	0.866166	500	1	1.2549
Krtap4-9	1	0.9708	0.97097	0.996538	15674	0	1.2549	0.0292	0.029129	0.866166	481	1	1.2549
Fam211b	1	0.9708	0.97097	0.996538	15675	0	1.2549	0.0292	0.029129	0.866166	485	1	1.2549
1700034J05Rik	1	0.9708	0.97097	0.996538	15676	0	1.2549	0.0292	0.029129	0.866166	486	1	1.2549
Gm8817	1	0.9708	0.97097	0.996538	15677	0	1.2549	0.0292	0.029129	0.866166	484	1	1.2549
1700123O20Rik	1	0.9708	0.97097	0.996538	15678	0	1.2549	0.0292	0.029129	0.866166	502	1	1.2549
Zdhhc21	1	0.9708	0.97097	0.996538	15679	0	1.2549	0.0292	0.029129	0.866166	483	1	1.2549
Olfr288	1	0.9708	0.97097	0.996538	15680	0	1.2549	0.0292	0.029129	0.866166	482	1	1.2549
Oaz1	1	0.9708	0.97097	0.996538	15681	0	1.2549	0.0292	0.029129	0.866166	499	1	1.2549
Ccdc97	1	0.9708	0.97097	0.996538	15682	0	1.2549	0.0292	0.029129	0.866166	527	1	1.2549
Zscan22	1	0.9708	0.97097	0.996538	15683	0	1.2549	0.0292	0.029129	0.866166	489	1	1.2549
Zfp959	1	0.9708	0.97097	0.996538	15684	0	1.2549	0.0292	0.029129	0.866166	480	1	1.2549
Mlh3	1	0.9708	0.97097	0.996538	15685	0	1.2549	0.0292	0.029129	0.866166	514	1	1.2549
1700001L19Rik	1	0.9708	0.97097	0.996538	15686	0	1.2549	0.0292	0.029129	0.866166	518	1	1.2549
Psmb11	1	0.9708	0.97097	0.996538	15687	0	1.2549	0.0292	0.029129	0.866166	521	1	1.2549
Ogfod3	1	0.9708	0.97097	0.996538	15688	0	1.2549	0.0292	0.029129	0.866166	511	1	1.2549
Olfr1093	1	0.9708	0.97097	0.996538	15689	0	1.2549	0.0292	0.029129	0.866166	496	1	1.2549
Usp35	1	0.9708	0.97097	0.996538	15690	0	1.2549	0.0292	0.029129	0.866166	497	1	1.2549
Enpp2	1	0.9708	0.97097	0.996538	15691	0	1.2549	0.0292	0.029129	0.866166	498	1	1.2549
Mrap	1	0.9708	0.97097	0.996538	15692	0	1.2549	0.0292	0.029129	0.866166	495	1	1.2549
Ch25h	1	0.9708	0.97097	0.996538	15693	0	1.2549	0.0292	0.029129	0.866166	492	1	1.2549
Cfdp1	1	0.9708	0.97097	0.996538	15694	0	1.2549	0.0292	0.029129	0.866166	503	1	1.2549
Cnot10	1	0.9708	0.97097	0.996538	15695	0	1.2549	0.0292	0.029129	0.866166	506	1	1.2549
Rmi2	1	0.9708	0.97097	0.996538	15696	0	1.2549	0.0292	0.029129	0.866166	526	1	1.2549
Hps5	1	0.9708	0.97097	0.996538	15697	0	1.2549	0.0292	0.029129	0.866166	528	1	1.2549
mmu-mir-3073a	1	0.9708	0.97097	0.996538	15698	0	1.2549	0.0292	0.029129	0.866166	529	1	1.2549
Oser1	1	0.9708	0.97097	0.996538	15699	0	1.2549	0.0292	0.029129	0.866166	533	1	1.2549
Asf1b	1	0.9708	0.97097	0.996538	15700	0	1.2549	0.0292	0.029129	0.866166	517	1	1.2549
Pla2g2a	1	0.9708	0.97097	0.996538	15701	0	1.2549	0.0292	0.029129	0.866166	516	1	1.2549
Cep250	1	0.9708	0.97097	0.996538	15702	0	1.2549	0.0292	0.029129	0.866166	513	1	1.2549
Mthfd1	1	0.9708	0.97097	0.996538	15703	0	1.2549	0.0292	0.029129	0.866166	537	1	1.2549
Fbxw4	1	0.9708	0.97097	0.996538	15704	0	1.2549	0.0292	0.029129	0.866166	490	1	1.2549
Ddx24	1	0.9708	0.97097	0.996538	15705	0	1.2549	0.0292	0.029129	0.866166	530	1	1.2549
Tmem9	1	0.9708	0.97097	0.996538	15706	0	1.2549	0.0292	0.029129	0.866166	535	1	1.2549
Pa2g4	1	0.9708	0.97097	0.996538	15707	0	1.2549	0.0292	0.029129	0.866166	538	1	1.2549
4930503B20Rik	1	0.9708	0.97097	0.996538	15708	0	1.2549	0.0292	0.029129	0.866166	534	1	1.2549
Atp6v1e1	1	0.9708	0.97097	0.996538	15709	0	1.2549	0.0292	0.029129	0.866166	510	1	1.2549
BC048562	1	0.9708	0.97097	0.996538	15710	0	1.2549	0.0292	0.029129	0.866166	520	1	1.2549
Kif18b	1	0.9708	0.97097	0.996538	15711	0	1.2549	0.0292	0.029129	0.866166	523	1	1.2549
Txndc16	1	0.9708	0.97097	0.996538	15712	0	1.2549	0.0292	0.029129	0.866166	512	1	1.2549
Tnfrsf11b	1	0.9708	0.97097	0.996538	15713	0	1.2549	0.0292	0.029129	0.866166	509	1	1.2549
NonTargetingControlGuideForMouse_0343	1	0.9708	0.97097	0.996538	15714	0	1.2549	0.0292	0.029129	0.866166	525	1	1.2549
mmu-mir-6909	1	0.9708	0.97097	0.996538	15715	0	1.2549	0.0292	0.029129	0.866166	487	1	1.2549
Olfr986	1	0.9708	0.97097	0.996538	15716	0	1.2549	0.0292	0.029129	0.866166	488	1	1.2549
NonTargetingControlGuideForMouse_0537	1	0.9708	0.97097	0.996538	15717	0	1.2549	0.0292	0.029129	0.866166	524	1	1.2549
Terf1	1	0.9708	0.97097	0.996538	15718	0	1.2549	0.0292	0.029129	0.866166	531	1	1.2549
Nkx2-9	1	0.9708	0.97097	0.996538	15719	0	1.2549	0.0292	0.029129	0.866166	491	1	1.2549
Dagla	1	0.9708	0.97097	0.996538	15720	0	1.2549	0.0292	0.029129	0.866166	508	1	1.2549
Tspo2	1	0.9708	0.97097	0.996538	15721	0	1.2549	0.0292	0.029129	0.866166	532	1	1.2549
Tmprss11a	1	0.9708	0.97097	0.996538	15722	0	1.2549	0.0292	0.029129	0.866166	515	1	1.2549
Rnf208	1	0.9708	0.97097	0.996538	15723	0	1.2549	0.0292	0.029129	0.866166	522	1	1.2549
Wfdc5	1	0.9708	0.97097	0.996538	15724	0	1.2549	0.0292	0.029129	0.866166	519	1	1.2549
Gucd1	2	0.23399	0.3626	0.921989	4711	1	-0.26903	0.029226	0.031366	0.866166	543	1	-0.26903
Aldh1l2	2	0.469	0.52137	0.924505	8482	1	-0.012602	0.029226	0.031366	0.866166	539	1	-0.012602
Gbp10	2	0.776	0.77559	0.958804	12168	0	0.35906	0.029226	0.031366	0.866166	540	1	0.35906
mmu-mir-294	2	0.83561	0.83526	0.973802	13597	0	0.38892	0.029226	0.031366	0.866166	542	1	0.38892
Accs	2	0.98239	0.98241	0.998995	15829	0	0.81094	0.029226	0.031366	0.866166	541	1	0.81094
Serpinb9e	2	0.95642	0.95651	0.994154	15282	0	0.6824	0.030061	0.032167	0.866166	544	1	0.6824
Fastkd2	2	0.97901	0.97906	0.998995	15797	0	0.68451	0.030061	0.032167	0.866166	545	1	0.68451
Mpnd	2	0.83561	0.83526	0.973802	13521	0	0.60315	0.03034	0.032426	0.866166	546	1	0.60315
Tmbim6	2	0.037644	0.068097	0.899505	818	1	-0.7303	0.030618	0.032696	0.866166	547	1	-0.7303
Efhd1	3	0.72785	0.76399	0.958804	11933	1	-0.57831	0.030995	0.038824	0.866166	548	1	-0.57831
Polr3a	3	0.83947	0.84215	0.97445	13934	1	-0.57831	0.031351	0.03914	0.866166	549	1	-0.57831
Stoml1	1	0.96787	0.96812	0.996538	15656	0	1.2502	0.032128	0.032054	0.866166	551	1	1.2502
BC026585	1	0.96787	0.96812	0.996538	15657	0	1.2502	0.032128	0.032054	0.866166	550	1	1.2502
Usp34	1	0.96765	0.96789	0.996538	15653	0	1.5234	0.032351	0.032279	0.866166	552	1	1.5234
Gper1	1	0.9671	0.96734	0.996538	15641	0	1.2507	0.032896	0.032847	0.866166	562	1	1.2507
Mknk1	1	0.9671	0.96734	0.996538	15642	0	1.2507	0.032896	0.032847	0.866166	563	1	1.2507
Ascl1	1	0.9671	0.96734	0.996538	15643	0	1.2507	0.032896	0.032847	0.866166	561	1	1.2507
Kcnc4	1	0.9671	0.96734	0.996538	15644	0	1.2507	0.032896	0.032847	0.866166	564	1	1.2507
Olfr747	1	0.9671	0.96734	0.996538	15645	0	1.2507	0.032896	0.032847	0.866166	553	1	1.2507
Myoz1	1	0.9671	0.96734	0.996538	15646	0	1.2507	0.032896	0.032847	0.866166	555	1	1.2507
Nyap1	1	0.9671	0.96734	0.996538	15647	0	1.2507	0.032896	0.032847	0.866166	554	1	1.2507
Trim25	1	0.9671	0.96734	0.996538	15648	0	1.2507	0.032896	0.032847	0.866166	557	1	1.2507
NonTargetingControlGuideForMouse_0575	1	0.9671	0.96734	0.996538	15649	0	1.2507	0.032896	0.032847	0.866166	556	1	1.2507
Papss2	1	0.9671	0.96734	0.996538	15650	0	1.2507	0.032896	0.032847	0.866166	558	1	1.2507
Smad9	1	0.9671	0.96734	0.996538	15651	0	1.2507	0.032896	0.032847	0.866166	560	1	1.2507
Fam150b	1	0.9671	0.96734	0.996538	15652	0	1.2507	0.032896	0.032847	0.866166	559	1	1.2507
Cpne4	1	0.96636	0.96666	0.996538	15640	0	1.5593	0.033643	0.033579	0.866166	565	1	1.5593
Tmem52b	1	0.9663	0.9666	0.996538	15639	0	1.5561	0.033704	0.033644	0.866166	566	1	1.5561
mmu-mir-5112	1	0.96601	0.9663	0.996538	15631	0	1.3562	0.033986	0.033911	0.866166	570	1	1.3562
Vmn1r32	1	0.96601	0.9663	0.996538	15632	0	1.3562	0.033986	0.033911	0.866166	573	1	1.3562
Alx4	1	0.96601	0.9663	0.996538	15633	0	1.3562	0.033986	0.033911	0.866166	567	1	1.3562
Tnfrsf13c	1	0.96601	0.9663	0.996538	15634	0	1.3562	0.033986	0.033911	0.866166	572	1	1.3562
Olfr1347	1	0.96601	0.9663	0.996538	15635	0	1.3562	0.033986	0.033911	0.866166	568	1	1.3562
Six3	1	0.96601	0.9663	0.996538	15636	0	1.3562	0.033986	0.033911	0.866166	569	1	1.3562
NonTargetingControlGuideForMouse_0441	1	0.96601	0.9663	0.996538	15637	0	1.3562	0.033986	0.033911	0.866166	571	1	1.3562
Erap1	1	0.96581	0.96609	0.996538	15630	0	1.3509	0.034188	0.034111	0.866166	574	1	1.3509
Barhl2	1	0.96569	0.96597	0.996538	15627	0	1.4161	0.034309	0.034222	0.866166	575	1	1.4161
Olfr1350	1	0.96569	0.96597	0.996538	15628	0	1.4161	0.034309	0.034222	0.866166	576	1	1.4161
Skint11	1	0.96557	0.96585	0.996538	15626	0	1.6711	0.034431	0.034351	0.866166	577	1	1.6711
Cntln	2	0.0012516	0.0024249	0.899505	34	1	-1.8767	0.034511	0.036416	0.866166	605	1	-1.8767
Slc35a5	2	0.15097	0.24658	0.921989	3105	1	-0.47444	0.034511	0.036416	0.866166	595	1	-0.47444
Olfr600	2	0.2112	0.33178	0.921989	4604	1	-0.6645	0.034511	0.036416	0.866166	611	1	-0.6645
Leprel2	2	0.29371	0.40931	0.921989	5829	1	-0.26748	0.034511	0.036416	0.866166	609	1	-0.26748
AF529169	2	0.37145	0.45682	0.921989	6877	1	-0.1828	0.034511	0.036416	0.866166	610	1	-0.1828
Trnp1	2	0.37145	0.45682	0.921989	6937	1	-0.1828	0.034511	0.036416	0.866166	583	1	-0.1828
Tdrp	2	0.37145	0.45682	0.921989	6938	1	-0.1828	0.034511	0.036416	0.866166	607	1	-0.1828
Ddx56	2	0.37145	0.45682	0.921989	6947	1	-0.1828	0.034511	0.036416	0.866166	608	1	-0.1828
Plxnd1	2	0.469	0.52137	0.924505	8385	1	-0.086836	0.034511	0.036416	0.866166	600	1	-0.086836
Tecta	2	0.469	0.52137	0.924505	8471	1	-0.086836	0.034511	0.036416	0.866166	602	1	-0.086836
mmu-mir-7046	2	0.469	0.52137	0.924505	8539	1	-0.086836	0.034511	0.036416	0.866166	588	1	-0.086836
Arhgap27	2	0.51082	0.55047	0.924505	8779	1	0.21072	0.034511	0.036416	0.866166	603	1	0.21072
Zmat5	2	0.52088	0.55776	0.924505	8902	1	-0.16835	0.034511	0.036416	0.866166	581	1	-0.16835
Mb	2	0.5225	0.55895	0.924505	8927	1	-0.25872	0.034511	0.036416	0.866166	578	1	-0.25872
Olfr1289	2	0.5315	0.56548	0.924505	9044	1	-0.19756	0.034511	0.036416	0.866166	601	1	-0.19756
Triobp	2	0.58004	0.6017	0.924505	9254	1	0.023881	0.034511	0.036416	0.866166	584	1	0.023881
Dcst1	2	0.58004	0.6017	0.924505	9304	1	0.023881	0.034511	0.036416	0.866166	582	1	0.023881
C8b	2	0.58004	0.6017	0.924505	9346	1	0.023881	0.034511	0.036416	0.866166	606	1	0.023881
Ildr1	2	0.70463	0.70607	0.958804	11419	1	0.15473	0.034511	0.036416	0.866166	580	1	0.15473
Cryba1	2	0.70463	0.70607	0.958804	11450	1	0.15473	0.034511	0.036416	0.866166	594	1	0.15473
Oxr1	2	0.78407	0.78356	0.958804	12221	0	0.24846	0.034511	0.036416	0.866166	592	1	0.24846
mmu-mir-1898	2	0.83561	0.83526	0.973802	13382	0	0.31469	0.034511	0.036416	0.866166	599	1	0.31469
Sharpin	2	0.83561	0.83526	0.973802	13417	0	0.31469	0.034511	0.036416	0.866166	589	1	0.31469
Stxbp6	2	0.83561	0.83526	0.973802	13465	0	0.31469	0.034511	0.036416	0.866166	604	1	0.31469
mmu-mir-3080	2	0.83561	0.83526	0.973802	13736	0	0.31469	0.034511	0.036416	0.866166	585	1	0.31469
Cenpw	2	0.88177	0.88164	0.994154	14241	0	0.29904	0.034511	0.036416	0.866166	590	1	0.29904
Neurog1	2	0.88756	0.88746	0.994154	14325	0	0.33939	0.034511	0.036416	0.866166	579	1	0.33939
Tnnc2	2	0.8947	0.89452	0.994154	14481	0	0.41625	0.034511	0.036416	0.866166	598	1	0.41625
Chst7	2	0.90767	0.9075	0.994154	14666	0	0.5271	0.034511	0.036416	0.866166	612	1	0.5271
Dio2	2	0.92777	0.92768	0.994154	14915	0	0.67111	0.034511	0.036416	0.866166	586	1	0.67111
Tcstv3	2	0.95642	0.95651	0.994154	15328	0	0.52054	0.034511	0.036416	0.866166	597	1	0.52054
Sirpb1b	2	0.95642	0.95651	0.994154	15499	0	0.52054	0.034511	0.036416	0.866166	596	1	0.52054
Cdv3	2	0.99265	0.99266	0.999196	16015	0	0.9981	0.034511	0.036416	0.866166	587	1	0.9981
Ncoa6	2	0.99389	0.99389	0.999196	16044	0	1.094	0.034511	0.036416	0.866166	591	1	1.094
Cep57	2	0.99512	0.99505	0.999196	16068	0	1.0302	0.034511	0.036416	0.866166	593	1	1.0302
Zfp82	1	0.96543	0.96572	0.996538	15622	0	1.4549	0.034572	0.034501	0.866166	613	1	1.4549
Nipal2	1	0.96543	0.96572	0.996538	15623	0	1.4549	0.034572	0.034501	0.866166	614	1	1.4549
Rnf138	1	0.96543	0.96572	0.996538	15624	0	1.4549	0.034572	0.034501	0.866166	615	1	1.4549
Cwc25	1	0.96543	0.96572	0.996538	15625	0	1.4549	0.034572	0.034501	0.866166	616	1	1.4549
NonTargetingControlGuideForMouse_0787	1	0.96529	0.96558	0.996538	15621	0	1.4534	0.034713	0.034648	0.866166	617	1	1.4534
Gdf3	1	0.96525	0.96554	0.996538	15619	0	1.5988	0.034754	0.034694	0.866166	618	1	1.5988
Klrb1c	1	0.96508	0.96538	0.996538	15617	0	1.6446	0.034915	0.034865	0.866166	619	1	1.6446
NonTargetingControlGuideForMouse_0131	1	0.965	0.96528	0.996538	15615	0	1.509	0.034996	0.034938	0.866166	620	1	1.509
Map3k5	1	0.96488	0.96516	0.996538	15614	0	1.4034	0.035117	0.035058	0.866166	621	1	1.4034
Sftpb	1	0.9648	0.96508	0.996538	15613	0	1.3615	0.035198	0.035138	0.866166	622	1	1.3615
Ugp2	1	0.9645	0.96476	0.996538	15610	0	1.2035	0.035501	0.035431	0.866166	623	1	1.2035
Ipo9	1	0.9645	0.96476	0.996538	15611	0	1.2035	0.035501	0.035431	0.866166	624	1	1.2035
Myh4	1	0.9645	0.96476	0.996538	15612	0	1.2035	0.035501	0.035431	0.866166	625	1	1.2035
BB287469	4	0.51574	0.68129	0.958804	8830	2	-1.2874	0.036878	0.052004	0.866166	626	1	-1.2874
St8sia4	3	0.0061063	0.016755	0.899505	137	2	-1.5716	0.037624	0.044707	0.866166	628	1	-1.5716
Plbd2	3	0.0065889	0.018041	0.899505	154	1	-1.4952	0.037624	0.044707	0.866166	627	1	-1.4952
Figf	3	0.43495	0.59028	0.924505	7356	2	-1.3099	0.037624	0.044707	0.866166	632	1	-1.3099
Gpr31b	3	0.61306	0.7037	0.958804	10634	1	-0.56097	0.037624	0.044707	0.866166	631	1	-0.56097
Hdhd1a	3	0.7896	0.80375	0.971756	12258	1	-0.57831	0.037624	0.044707	0.866166	629	1	-0.57831
Prl2c5	3	0.93335	0.93355	0.994154	15017	0	-0.5741	0.037624	0.044707	0.866166	633	1	-0.5741
Pde7a	3	0.93335	0.93355	0.994154	15033	0	-0.41662	0.037624	0.044707	0.866166	630	1	-0.41662
Tmem247	3	0.96202	0.96223	0.995352	15601	0	-0.57831	0.037624	0.044707	0.866166	634	1	-0.57831
Olfr703	1	0.96076	0.96105	0.994387	15536	0	1.0311	0.039237	0.039147	0.866166	676	1	1.0311
BC107364	1	0.96076	0.96105	0.994387	15537	0	1.0311	0.039237	0.039147	0.866166	677	1	1.0311
Rhox12	1	0.96076	0.96105	0.994387	15538	0	1.0311	0.039237	0.039147	0.866166	692	1	1.0311
Mum1	1	0.96076	0.96105	0.994387	15539	0	1.0311	0.039237	0.039147	0.866166	693	1	1.0311
Teddm1	1	0.96076	0.96105	0.994387	15540	0	1.0311	0.039237	0.039147	0.866166	674	1	1.0311
Oas1d	1	0.96076	0.96105	0.994387	15541	0	1.0311	0.039237	0.039147	0.866166	675	1	1.0311
Pacrg	1	0.96076	0.96105	0.994387	15542	0	1.0311	0.039237	0.039147	0.866166	678	1	1.0311
Map4k2	1	0.96076	0.96105	0.994387	15543	0	1.0311	0.039237	0.039147	0.866166	673	1	1.0311
Prkci	1	0.96076	0.96105	0.994387	15544	0	1.0311	0.039237	0.039147	0.866166	686	1	1.0311
Usp44	1	0.96076	0.96105	0.994387	15545	0	1.0311	0.039237	0.039147	0.866166	687	1	1.0311
Nlgn2	1	0.96076	0.96105	0.994387	15546	0	1.0311	0.039237	0.039147	0.866166	690	1	1.0311
Exog	1	0.96076	0.96105	0.994387	15547	0	1.0311	0.039237	0.039147	0.866166	685	1	1.0311
Dnajc6	1	0.96076	0.96105	0.994387	15548	0	1.0311	0.039237	0.039147	0.866166	696	1	1.0311
Lhfpl5	1	0.96076	0.96105	0.994387	15549	0	1.0311	0.039237	0.039147	0.866166	691	1	1.0311
Sema3a	1	0.96076	0.96105	0.994387	15550	0	1.0311	0.039237	0.039147	0.866166	694	1	1.0311
Kcnab1	1	0.96076	0.96105	0.994387	15551	0	1.0311	0.039237	0.039147	0.866166	695	1	1.0311
Plscr2	1	0.96076	0.96105	0.994387	15552	0	1.0311	0.039237	0.039147	0.866166	682	1	1.0311
mmu-mir-711	1	0.96076	0.96105	0.994387	15553	0	1.0311	0.039237	0.039147	0.866166	645	1	1.0311
Rnf223	1	0.96076	0.96105	0.994387	15554	0	1.0311	0.039237	0.039147	0.866166	647	1	1.0311
Abi1	1	0.96076	0.96105	0.994387	15555	0	1.0311	0.039237	0.039147	0.866166	635	1	1.0311
Serpina11	1	0.96076	0.96105	0.994387	15556	0	1.0311	0.039237	0.039147	0.866166	648	1	1.0311
Taf9	1	0.96076	0.96105	0.994387	15557	0	1.0311	0.039237	0.039147	0.866166	643	1	1.0311
Pip5k1a	1	0.96076	0.96105	0.994387	15558	0	1.0311	0.039237	0.039147	0.866166	644	1	1.0311
Tardbp	1	0.96076	0.96105	0.994387	15559	0	1.0311	0.039237	0.039147	0.866166	639	1	1.0311
Dffa	1	0.96076	0.96105	0.994387	15560	0	1.0311	0.039237	0.039147	0.866166	642	1	1.0311
Tmem185b	1	0.96076	0.96105	0.994387	15561	0	1.0311	0.039237	0.039147	0.866166	679	1	1.0311
Rrm2	1	0.96076	0.96105	0.994387	15562	0	1.0311	0.039237	0.039147	0.866166	680	1	1.0311
Rassf8	1	0.96076	0.96105	0.994387	15563	0	1.0311	0.039237	0.039147	0.866166	683	1	1.0311
Zfp688	1	0.96076	0.96105	0.994387	15564	0	1.0311	0.039237	0.039147	0.866166	684	1	1.0311
Gm597	1	0.96076	0.96105	0.994387	15565	0	1.0311	0.039237	0.039147	0.866166	641	1	1.0311
Fgf14	1	0.96076	0.96105	0.994387	15566	0	1.0311	0.039237	0.039147	0.866166	638	1	1.0311
Mblac2	1	0.96076	0.96105	0.994387	15567	0	1.0311	0.039237	0.039147	0.866166	681	1	1.0311
Zbtb8os	1	0.96076	0.96105	0.994387	15568	0	1.0311	0.039237	0.039147	0.866166	640	1	1.0311
Olfr1120	1	0.96076	0.96105	0.994387	15569	0	1.0311	0.039237	0.039147	0.866166	658	1	1.0311
Gsk3a	1	0.96076	0.96105	0.994387	15570	0	1.0311	0.039237	0.039147	0.866166	651	1	1.0311
Ppp1r12b	1	0.96076	0.96105	0.994387	15571	0	1.0311	0.039237	0.039147	0.866166	660	1	1.0311
4930564B18Rik	1	0.96076	0.96105	0.994387	15572	0	1.0311	0.039237	0.039147	0.866166	659	1	1.0311
Ryk	1	0.96076	0.96105	0.994387	15573	0	1.0311	0.039237	0.039147	0.866166	654	1	1.0311
Trpm5	1	0.96076	0.96105	0.994387	15574	0	1.0311	0.039237	0.039147	0.866166	652	1	1.0311
Tmco3	1	0.96076	0.96105	0.994387	15575	0	1.0311	0.039237	0.039147	0.866166	650	1	1.0311
Spats2l	1	0.96076	0.96105	0.994387	15576	0	1.0311	0.039237	0.039147	0.866166	649	1	1.0311
Olfr1048	1	0.96076	0.96105	0.994387	15577	0	1.0311	0.039237	0.039147	0.866166	646	1	1.0311
Fgf17	1	0.96076	0.96105	0.994387	15578	0	1.0311	0.039237	0.039147	0.866166	689	1	1.0311
Dnajc2	1	0.96076	0.96105	0.994387	15579	0	1.0311	0.039237	0.039147	0.866166	636	1	1.0311
Ide	1	0.96076	0.96105	0.994387	15580	0	1.0311	0.039237	0.039147	0.866166	637	1	1.0311
Clca4	1	0.96076	0.96105	0.994387	15581	0	1.0311	0.039237	0.039147	0.866166	656	1	1.0311
Batf3	1	0.96076	0.96105	0.994387	15582	0	1.0311	0.039237	0.039147	0.866166	655	1	1.0311
Rasgrp4	1	0.96076	0.96105	0.994387	15583	0	1.0311	0.039237	0.039147	0.866166	688	1	1.0311
Slc27a4	1	0.96076	0.96105	0.994387	15584	0	1.0311	0.039237	0.039147	0.866166	657	1	1.0311
Ccno	1	0.96076	0.96105	0.994387	15585	0	1.0311	0.039237	0.039147	0.866166	653	1	1.0311
Rab2a	1	0.96076	0.96105	0.994387	15586	0	1.0311	0.039237	0.039147	0.866166	663	1	1.0311
Ascl5	1	0.96076	0.96105	0.994387	15587	0	1.0311	0.039237	0.039147	0.866166	670	1	1.0311
Fbxo15	1	0.96076	0.96105	0.994387	15588	0	1.0311	0.039237	0.039147	0.866166	662	1	1.0311
Prdm2	1	0.96076	0.96105	0.994387	15589	0	1.0311	0.039237	0.039147	0.866166	664	1	1.0311
mmu-mir-92a-1	1	0.96076	0.96105	0.994387	15590	0	1.0311	0.039237	0.039147	0.866166	666	1	1.0311
Grin3b	1	0.96076	0.96105	0.994387	15591	0	1.0311	0.039237	0.039147	0.866166	661	1	1.0311
Tcf7l2	1	0.96076	0.96105	0.994387	15592	0	1.0311	0.039237	0.039147	0.866166	665	1	1.0311
Mrs2	1	0.96076	0.96105	0.994387	15593	0	1.0311	0.039237	0.039147	0.866166	669	1	1.0311
Defb33	1	0.96076	0.96105	0.994387	15594	0	1.0311	0.039237	0.039147	0.866166	667	1	1.0311
Scgb2b3	1	0.96076	0.96105	0.994387	15595	0	1.0311	0.039237	0.039147	0.866166	668	1	1.0311
Zfp747	1	0.96076	0.96105	0.994387	15596	0	1.0311	0.039237	0.039147	0.866166	671	1	1.0311
Dyrk1a	1	0.96076	0.96105	0.994387	15597	0	1.0311	0.039237	0.039147	0.866166	672	1	1.0311
Apobr	2	0.469	0.52137	0.924505	8430	1	-0.088937	0.039307	0.040986	0.866166	699	1	-0.088937
Copb1	2	0.70463	0.70607	0.958804	11552	1	0.15263	0.039307	0.040986	0.866166	697	1	0.15263
AI182371	2	0.89746	0.89731	0.994154	14505	0	0.43208	0.039307	0.040986	0.866166	698	1	0.43208
0610037L13Rik	2	0.98322	0.98325	0.998995	15878	0	0.88189	0.039901	0.04159	0.866166	700	1	0.88189
Abca15	3	0.83947	0.84215	0.97445	13909	1	-0.99	0.042517	0.049138	0.866166	701	1	-0.99
Tacr1	3	0.93335	0.93355	0.994154	15053	0	-0.99	0.042517	0.049138	0.866166	702	1	-0.99
Scap	1	0.95715	0.95745	0.994387	15531	0	1.03	0.042851	0.042787	0.866166	703	1	1.03
1700012B09Rik	1	0.95709	0.9574	0.994387	15530	0	1.4526	0.042912	0.042844	0.866166	704	1	1.4526
Ect2	1	0.95691	0.9572	0.994387	15528	0	1.0267	0.043094	0.043037	0.866166	706	1	1.0267
Zar1	1	0.95691	0.9572	0.994387	15529	0	1.0267	0.043094	0.043037	0.866166	705	1	1.0267
Grm5	1	0.95616	0.95642	0.994154	15260	0	1.0269	0.043841	0.043791	0.866166	715	1	1.0269
Gm4841	1	0.95616	0.95642	0.994154	15261	0	1.0269	0.043841	0.043791	0.866166	708	1	1.0269
Lin37	1	0.95616	0.95642	0.994154	15262	0	1.0269	0.043841	0.043791	0.866166	707	1	1.0269
mmu-mir-6983	1	0.95616	0.95642	0.994154	15263	0	1.0269	0.043841	0.043791	0.866166	716	1	1.0269
Pam	1	0.95616	0.95642	0.994154	15264	0	1.0269	0.043841	0.043791	0.866166	713	1	1.0269
NonTargetingControlGuideForMouse_0987	1	0.95616	0.95642	0.994154	15265	0	1.0269	0.043841	0.043791	0.866166	712	1	1.0269
Slc26a4	1	0.95616	0.95642	0.994154	15266	0	1.0269	0.043841	0.043791	0.866166	714	1	1.0269
Ppox	1	0.95616	0.95642	0.994154	15267	0	1.0269	0.043841	0.043791	0.866166	720	1	1.0269
Zfp511	1	0.95616	0.95642	0.994154	15268	0	1.0269	0.043841	0.043791	0.866166	710	1	1.0269
Slc46a1	1	0.95616	0.95642	0.994154	15269	0	1.0269	0.043841	0.043791	0.866166	711	1	1.0269
Cdc37l1	1	0.95616	0.95642	0.994154	15270	0	1.0269	0.043841	0.043791	0.866166	721	1	1.0269
Cdh7	1	0.95616	0.95642	0.994154	15271	0	1.0269	0.043841	0.043791	0.866166	718	1	1.0269
Anln	1	0.95616	0.95642	0.994154	15272	0	1.0269	0.043841	0.043791	0.866166	717	1	1.0269
Gtpbp10	1	0.95616	0.95642	0.994154	15273	0	1.0269	0.043841	0.043791	0.866166	719	1	1.0269
4833439L19Rik	1	0.95616	0.95642	0.994154	15274	0	1.0269	0.043841	0.043791	0.866166	709	1	1.0269
Tmub1	2	0.037644	0.068097	0.899505	826	1	-0.63118	0.044367	0.045849	0.866166	736	1	-0.63118
Rnf219	2	0.045867	0.082147	0.901639	1066	1	-1.0176	0.044367	0.045849	0.866166	732	1	-1.0176
Igsf3	2	0.081275	0.14026	0.901639	1884	1	-0.72045	0.044367	0.045849	0.866166	762	1	-0.72045
Barx2	2	0.10867	0.18333	0.901639	2330	1	-0.82858	0.044367	0.045849	0.866166	740	1	-0.82858
9130019O22Rik	2	0.12314	0.20528	0.901639	2415	1	-0.61743	0.044367	0.045849	0.866166	743	1	-0.61743
Cdyl	2	0.12314	0.20528	0.901639	2462	1	-0.61743	0.044367	0.045849	0.866166	760	1	-0.61743
Olfr299	2	0.18687	0.29805	0.921989	3798	1	-0.49721	0.044367	0.045849	0.866166	725	1	-0.49721
Zxdc	2	0.20487	0.32319	0.921989	3824	1	-0.80214	0.044367	0.045849	0.866166	726	1	-0.80214
Gfi1	2	0.23399	0.3626	0.921989	4778	1	-0.42864	0.044367	0.045849	0.866166	757	1	-0.42864
1810062G17Rik	2	0.29371	0.40931	0.921989	5685	1	-0.35286	0.044367	0.045849	0.866166	729	1	-0.35286
Atf6	2	0.33052	0.43127	0.921989	6090	1	-0.4704	0.044367	0.045849	0.866166	737	1	-0.4704
Brd7	2	0.37145	0.45682	0.921989	6962	1	-0.26818	0.044367	0.045849	0.866166	755	1	-0.26818
Pla2g2c	2	0.37145	0.45682	0.921989	6972	1	-0.26818	0.044367	0.045849	0.866166	733	1	-0.26818
Tdg	2	0.51982	0.55699	0.924505	8882	1	-0.34157	0.044367	0.045849	0.866166	742	1	-0.34157
Atp6ap1	2	0.58004	0.6017	0.924505	9301	1	-0.061499	0.044367	0.045849	0.866166	741	1	-0.061499
Zfp473	2	0.58004	0.6017	0.924505	9497	1	-0.061499	0.044367	0.045849	0.866166	738	1	-0.061499
Ltb4r1	2	0.65242	0.66007	0.958804	10820	1	-0.07162	0.044367	0.045849	0.866166	735	1	-0.07162
Mpst	2	0.70463	0.70607	0.958804	11270	1	0.069348	0.044367	0.045849	0.866166	748	1	0.069348
Cd300lb	2	0.70463	0.70607	0.958804	11331	1	0.069348	0.044367	0.045849	0.866166	764	1	0.069348
mmu-mir-199a-2	2	0.70463	0.70607	0.958804	11436	1	0.069348	0.044367	0.045849	0.866166	745	1	0.069348
Pdc	2	0.70463	0.70607	0.958804	11649	1	0.069348	0.044367	0.045849	0.866166	761	1	0.069348
Cenpe	2	0.70463	0.70607	0.958804	11721	1	0.069348	0.044367	0.045849	0.866166	734	1	0.069348
Sdhaf1	2	0.77297	0.77261	0.958804	12145	0	0.074844	0.044367	0.045849	0.866166	754	1	0.074844
Cyfip1	2	0.78759	0.78712	0.958804	12243	0	0.19962	0.044367	0.045849	0.866166	731	1	0.19962
Tmem30b	2	0.83561	0.83526	0.973802	13419	0	0.22931	0.044367	0.045849	0.866166	727	1	0.22931
mmu-mir-219c	2	0.83561	0.83526	0.973802	13420	0	0.22931	0.044367	0.045849	0.866166	739	1	0.22931
Srsf4	2	0.83561	0.83526	0.973802	13443	0	0.22931	0.044367	0.045849	0.866166	751	1	0.22931
Lrch2	2	0.83561	0.83526	0.973802	13497	0	0.22931	0.044367	0.045849	0.866166	763	1	0.22931
Ipo13	2	0.83561	0.83526	0.973802	13515	0	0.22931	0.044367	0.045849	0.866166	723	1	0.22931
Ramp3	2	0.83561	0.83526	0.973802	13543	0	0.22931	0.044367	0.045849	0.866166	724	1	0.22931
Zbtb9	2	0.83561	0.83526	0.973802	13613	0	0.22931	0.044367	0.045849	0.866166	744	1	0.22931
Rpusd1	2	0.83561	0.83526	0.973802	13751	0	0.22931	0.044367	0.045849	0.866166	746	1	0.22931
Lce6a	2	0.88441	0.88424	0.994154	14291	0	0.4461	0.044367	0.045849	0.866166	756	1	0.4461
Tbrg4	2	0.89788	0.89774	0.994154	14519	0	0.35301	0.044367	0.045849	0.866166	752	1	0.35301
Chac2	2	0.90383	0.90366	0.994154	14607	0	0.41115	0.044367	0.045849	0.866166	722	1	0.41115
Lrrc20	2	0.91038	0.91023	0.994154	14698	0	0.53441	0.044367	0.045849	0.866166	728	1	0.53441
Olfr601	2	0.95642	0.95651	0.994154	15308	0	0.43516	0.044367	0.045849	0.866166	747	1	0.43516
Btnl2	2	0.95642	0.95651	0.994154	15339	0	0.43516	0.044367	0.045849	0.866166	758	1	0.43516
Plce1	2	0.95642	0.95651	0.994154	15370	0	0.43516	0.044367	0.045849	0.866166	749	1	0.43516
Man1a	2	0.95642	0.95651	0.994154	15437	0	0.43516	0.044367	0.045849	0.866166	753	1	0.43516
Cabp2	2	0.95642	0.95651	0.994154	15512	0	0.43516	0.044367	0.045849	0.866166	759	1	0.43516
Psme2	2	0.99402	0.99402	0.999196	16045	0	1.0009	0.044367	0.045849	0.866166	730	1	1.0009
Rassf7	2	0.99576	0.99573	0.999584	16074	0	1.1064	0.044367	0.045849	0.866166	750	1	1.1064
Pign	1	0.95551	0.95575	0.994154	15259	0	1.0225	0.044487	0.044455	0.866166	765	1	1.0225
Elovl6	1	0.95533	0.95554	0.994154	15258	0	1.2617	0.044669	0.044639	0.866166	766	1	1.2617
NonTargetingControlGuideForMouse_0550	1	0.95519	0.9554	0.994154	15257	0	1.3399	0.04481	0.044796	0.866166	767	1	1.3399
Pitpnc1	1	0.95499	0.95521	0.994154	15255	0	1.1743	0.045012	0.045011	0.866166	768	1	1.1743
Ash1l	1	0.95499	0.95521	0.994154	15256	0	1.1743	0.045012	0.045011	0.866166	769	1	1.1743
Rsph3a	3	0.28443	0.43692	0.921989	5590	2	-1.5716	0.045045	0.051436	0.866166	770	1	-1.5716
Olfr638	1	0.95483	0.95504	0.994154	15253	0	1.2356	0.045174	0.045176	0.866166	771	1	1.2356
G6pc2	1	0.95475	0.95498	0.994154	15252	0	1.2334	0.045254	0.04526	0.866166	772	1	1.2334
Pmpca	3	0.93335	0.93355	0.994154	15002	0	-0.99	0.045398	0.051761	0.866166	773	1	-0.99
Olfr1484	1	0.95442	0.95467	0.994154	15251	0	1.1544	0.045578	0.045603	0.866166	774	1	1.1544
Ace3	1	0.95404	0.9543	0.994154	15245	0	1.0327	0.045961	0.045944	0.866166	777	1	1.0327
Grlf1	1	0.95404	0.9543	0.994154	15246	0	1.0327	0.045961	0.045944	0.866166	775	1	1.0327
Rffl	1	0.95404	0.9543	0.994154	15247	0	1.0327	0.045961	0.045944	0.866166	776	1	1.0327
Galk1	1	0.95404	0.9543	0.994154	15248	0	1.0327	0.045961	0.045944	0.866166	778	1	1.0327
Glrb	1	0.95404	0.9543	0.994154	15249	0	1.0327	0.045961	0.045944	0.866166	779	1	1.0327
Tcaim	1	0.95404	0.9543	0.994154	15250	0	1.0327	0.045961	0.045944	0.866166	780	1	1.0327
Vmn2r26	1	0.95374	0.95398	0.994154	15244	0	1.1437	0.046264	0.046254	0.866166	781	1	1.1437
Vmn1r215	1	0.95357	0.95383	0.994154	15242	0	1.1401	0.046426	0.046424	0.866166	782	1	1.1401
Tas2r121	1	0.95357	0.95383	0.994154	15243	0	1.1401	0.046426	0.046424	0.866166	783	1	1.1401
Slc6a12	1	0.95303	0.95331	0.994154	15236	0	1.0362	0.046971	0.046959	0.866166	784	1	1.0362
Ick	1	0.95303	0.95331	0.994154	15237	0	1.0362	0.046971	0.046959	0.866166	787	1	1.0362
Pln	1	0.95303	0.95331	0.994154	15238	0	1.0362	0.046971	0.046959	0.866166	786	1	1.0362
1700029P11Rik	1	0.95303	0.95331	0.994154	15239	0	1.0362	0.046971	0.046959	0.866166	789	1	1.0362
Golgb1	1	0.95303	0.95331	0.994154	15240	0	1.0362	0.046971	0.046959	0.866166	788	1	1.0362
Apba2	1	0.95303	0.95331	0.994154	15241	0	1.0362	0.046971	0.046959	0.866166	785	1	1.0362
Zfyve1	1	0.95265	0.95293	0.994154	15235	0	1.031	0.047355	0.047354	0.866166	790	1	1.031
Mospd3	1	0.95238	0.95268	0.994154	15232	0	1.0386	0.047617	0.047616	0.866166	793	1	1.0386
NonTargetingControlGuideForMouse_0472	1	0.95238	0.95268	0.994154	15233	0	1.0386	0.047617	0.047616	0.866166	791	1	1.0386
NonTargetingControlGuideForMouse_0968	1	0.95238	0.95268	0.994154	15234	0	1.0386	0.047617	0.047616	0.866166	792	1	1.0386
Ddx19b	1	0.95216	0.95243	0.994154	15231	0	1.1388	0.047839	0.047838	0.866166	794	1	1.1388
Ky	1	0.95206	0.95233	0.994154	15230	0	1.0402	0.04794	0.047948	0.866166	795	1	1.0402
Slc12a8	2	0.91146	0.91135	0.994154	14712	0	0.46502	0.04839	0.049634	0.866166	796	1	0.46502
Ccl4	2	0.29371	0.40931	0.921989	5741	1	-0.35496	0.049375	0.050575	0.866166	801	1	-0.35496
Csrp3	2	0.469	0.52137	0.924505	8497	1	-0.17432	0.049375	0.050575	0.866166	799	1	-0.17432
Tspan18	2	0.88639	0.88627	0.994154	14320	0	0.26456	0.049375	0.050575	0.866166	802	1	0.26456
Stk31	2	0.95642	0.95651	0.994154	15396	0	0.43306	0.049375	0.050575	0.866166	798	1	0.43306
mmu-mir-6933	2	0.95642	0.95651	0.994154	15474	0	0.43306	0.049375	0.050575	0.866166	797	1	0.43306
mmu-mir-26b	2	0.95642	0.95651	0.994154	15485	0	0.43306	0.049375	0.050575	0.866166	800	1	0.43306
Snx24	2	0.83561	0.83526	0.973802	13400	0	0.36327	0.05032	0.051499	0.866166	803	1	0.36327
Commd7	2	0.90691	0.90672	0.994154	14654	0	0.50664	0.050595	0.051761	0.866166	804	1	0.50664
Pqlc2	2	0.98367	0.98371	0.998995	15884	0	0.76838	0.050595	0.051761	0.866166	805	1	0.76838
Psma4	2	0.76533	0.76481	0.958804	12099	0	0.22013	0.05091	0.052054	0.866166	806	1	0.22013
Lnp	2	0.13614	0.22472	0.921989	2960	1	-0.48994	0.050989	0.052134	0.866166	807	1	-0.48994
Cd69	2	0.83561	0.83526	0.973802	13442	0	0.51478	0.051146	0.052283	0.866166	808	1	0.51478
Podxl	3	0.013749	0.036297	0.899505	319	1	-0.92101	0.051318	0.057129	0.866166	821	1	-0.92101
0610009O20Rik	3	0.042823	0.10435	0.901639	906	2	-2.3059	0.051318	0.057129	0.866166	822	1	-2.3059
Adcy3	3	0.045926	0.11112	0.901639	1068	1	-0.99	0.051318	0.057129	0.866166	815	1	-0.99
Ift172	3	0.079977	0.18219	0.901639	1842	2	-1.5716	0.051318	0.057129	0.866166	819	1	-1.5716
Gm5771	3	0.11099	0.24145	0.921989	2360	2	-1.985	0.051318	0.057129	0.866166	813	1	-1.985
Tubgcp6	3	0.14552	0.28941	0.921989	3046	2	-1.3099	0.051318	0.057129	0.866166	816	1	-1.3099
Slc16a3	3	0.1789	0.32542	0.921989	3592	1	-0.99	0.051318	0.057129	0.866166	817	1	-0.99
Olfr101	3	0.43495	0.59028	0.924505	7335	2	-1.3099	0.051318	0.057129	0.866166	810	1	-1.3099
Arr3	3	0.50168	0.65562	0.958804	8668	1	-1.5131	0.051318	0.057129	0.866166	809	1	-1.5131
Rab11a	3	0.61306	0.7037	0.958804	10617	1	-0.85869	0.051318	0.057129	0.866166	818	1	-0.85869
Ltbp2	3	0.72785	0.76399	0.958804	11935	1	-0.99	0.051318	0.057129	0.866166	811	1	-0.99
Atp6v1e2	3	0.83947	0.84215	0.97445	13852	1	-0.57831	0.051318	0.057129	0.866166	823	1	-0.57831
Smarcb1	3	0.83947	0.84215	0.97445	13940	1	0.035952	0.051318	0.057129	0.866166	824	1	0.035952
Park7	3	0.89331	0.89324	0.994154	14473	0	0.0168	0.051318	0.057129	0.866166	820	1	0.0168
Olfr1339	3	0.95906	0.95932	0.994387	15534	0	0.046287	0.051318	0.057129	0.866166	812	1	0.046287
Zmynd10	3	0.9909	0.99101	0.998995	15990	0	0.021002	0.051318	0.057129	0.866166	814	1	0.021002
Tpgs2	2	0.90872	0.90856	0.994154	14683	0	0.45774	0.051382	0.052505	0.866166	825	1	0.45774
Brms1l	2	0.91004	0.90988	0.994154	14696	0	0.47142	0.051658	0.052764	0.866166	826	1	0.47142
Vmn1r226	2	0.77977	0.77935	0.958804	12191	0	0.21292	0.051972	0.053064	0.866166	827	1	0.21292
Swi5	2	0.83561	0.83526	0.973802	13385	0	0.31989	0.05209	0.053178	0.866166	828	1	0.31989
Klf5	1	0.94766	0.94796	0.994154	15157	0	0.76603	0.052342	0.052383	0.866166	851	1	0.76603
Eda	1	0.94766	0.94796	0.994154	15158	0	0.76603	0.052342	0.052383	0.866166	850	1	0.76603
Slc1a4	1	0.94766	0.94796	0.994154	15159	0	0.76603	0.052342	0.052383	0.866166	849	1	0.76603
Smc3	1	0.94766	0.94796	0.994154	15160	0	0.76603	0.052342	0.052383	0.866166	852	1	0.76603
Snx16	1	0.94766	0.94796	0.994154	15161	0	0.76603	0.052342	0.052383	0.866166	832	1	0.76603
Sult2b1	1	0.94766	0.94796	0.994154	15162	0	0.76603	0.052342	0.052383	0.866166	830	1	0.76603
Arl5a	1	0.94766	0.94796	0.994154	15163	0	0.76603	0.052342	0.052383	0.866166	831	1	0.76603
Pyhin1	1	0.94766	0.94796	0.994154	15164	0	0.76603	0.052342	0.052383	0.866166	840	1	0.76603
Ece2	1	0.94766	0.94796	0.994154	15165	0	0.76603	0.052342	0.052383	0.866166	829	1	0.76603
Usp53	1	0.94766	0.94796	0.994154	15166	0	0.76603	0.052342	0.052383	0.866166	855	1	0.76603
Kcnj3	1	0.94766	0.94796	0.994154	15167	0	0.76603	0.052342	0.052383	0.866166	847	1	0.76603
mmu-mir-6369	1	0.94766	0.94796	0.994154	15168	0	0.76603	0.052342	0.052383	0.866166	842	1	0.76603
Glra3	1	0.94766	0.94796	0.994154	15169	0	0.76603	0.052342	0.052383	0.866166	848	1	0.76603
Lcn12	1	0.94766	0.94796	0.994154	15170	0	0.76603	0.052342	0.052383	0.866166	846	1	0.76603
Olfr935	1	0.94766	0.94796	0.994154	15171	0	0.76603	0.052342	0.052383	0.866166	845	1	0.76603
mmu-mir-6481	1	0.94766	0.94796	0.994154	15172	0	0.76603	0.052342	0.052383	0.866166	841	1	0.76603
Gpc6	1	0.94766	0.94796	0.994154	15173	0	0.76603	0.052342	0.052383	0.866166	853	1	0.76603
4930502E18Rik	1	0.94766	0.94796	0.994154	15174	0	0.76603	0.052342	0.052383	0.866166	856	1	0.76603
Slc2a2	1	0.94766	0.94796	0.994154	15175	0	0.76603	0.052342	0.052383	0.866166	854	1	0.76603
Mob3c	1	0.94766	0.94796	0.994154	15176	0	0.76603	0.052342	0.052383	0.866166	844	1	0.76603
Olfr361	1	0.94766	0.94796	0.994154	15177	0	0.76603	0.052342	0.052383	0.866166	843	1	0.76603
Abca17	1	0.94766	0.94796	0.994154	15178	0	0.76603	0.052342	0.052383	0.866166	837	1	0.76603
Med10	1	0.94766	0.94796	0.994154	15179	0	0.76603	0.052342	0.052383	0.866166	862	1	0.76603
Ctag2	1	0.94766	0.94796	0.994154	15180	0	0.76603	0.052342	0.052383	0.866166	866	1	0.76603
NonTargetingControlGuideForMouse_0860	1	0.94766	0.94796	0.994154	15181	0	0.76603	0.052342	0.052383	0.866166	867	1	0.76603
Kctd19	1	0.94766	0.94796	0.994154	15182	0	0.76603	0.052342	0.052383	0.866166	859	1	0.76603
Ankrd42	1	0.94766	0.94796	0.994154	15183	0	0.76603	0.052342	0.052383	0.866166	857	1	0.76603
Nfxl1	1	0.94766	0.94796	0.994154	15184	0	0.76603	0.052342	0.052383	0.866166	858	1	0.76603
Cldn3	1	0.94766	0.94796	0.994154	15185	0	0.76603	0.052342	0.052383	0.866166	879	1	0.76603
NonTargetingControlGuideForMouse_0963	1	0.94766	0.94796	0.994154	15186	0	0.76603	0.052342	0.052383	0.866166	894	1	0.76603
Gm12169	1	0.94766	0.94796	0.994154	15187	0	0.76603	0.052342	0.052383	0.866166	895	1	0.76603
Trim37	1	0.94766	0.94796	0.994154	15188	0	0.76603	0.052342	0.052383	0.866166	865	1	0.76603
Als2	1	0.94766	0.94796	0.994154	15189	0	0.76603	0.052342	0.052383	0.866166	863	1	0.76603
Cd320	1	0.94766	0.94796	0.994154	15190	0	0.76603	0.052342	0.052383	0.866166	864	1	0.76603
Gipr	1	0.94766	0.94796	0.994154	15191	0	0.76603	0.052342	0.052383	0.866166	861	1	0.76603
Spint3	1	0.94766	0.94796	0.994154	15192	0	0.76603	0.052342	0.052383	0.866166	868	1	0.76603
Defb12	1	0.94766	0.94796	0.994154	15193	0	0.76603	0.052342	0.052383	0.866166	869	1	0.76603
1700022I11Rik	1	0.94766	0.94796	0.994154	15194	0	0.76603	0.052342	0.052383	0.866166	873	1	0.76603
Cep350	1	0.94766	0.94796	0.994154	15195	0	0.76603	0.052342	0.052383	0.866166	871	1	0.76603
Olfr1151	1	0.94766	0.94796	0.994154	15196	0	0.76603	0.052342	0.052383	0.866166	872	1	0.76603
Vmn1r57	1	0.94766	0.94796	0.994154	15197	0	0.76603	0.052342	0.052383	0.866166	870	1	0.76603
mmu-mir-1932	1	0.94766	0.94796	0.994154	15198	0	0.76603	0.052342	0.052383	0.866166	874	1	0.76603
Got1	1	0.94766	0.94796	0.994154	15199	0	0.76603	0.052342	0.052383	0.866166	875	1	0.76603
Phf19	1	0.94766	0.94796	0.994154	15200	0	0.76603	0.052342	0.052383	0.866166	860	1	0.76603
Sf3b3	1	0.94766	0.94796	0.994154	15201	0	0.76603	0.052342	0.052383	0.866166	877	1	0.76603
Numb	1	0.94766	0.94796	0.994154	15202	0	0.76603	0.052342	0.052383	0.866166	878	1	0.76603
Pmaip1	1	0.94766	0.94796	0.994154	15203	0	0.76603	0.052342	0.052383	0.866166	876	1	0.76603
Gda	1	0.94766	0.94796	0.994154	15204	0	0.76603	0.052342	0.052383	0.866166	893	1	0.76603
Dnajb5	1	0.94766	0.94796	0.994154	15205	0	0.76603	0.052342	0.052383	0.866166	888	1	0.76603
2700029M09Rik	1	0.94766	0.94796	0.994154	15206	0	0.76603	0.052342	0.052383	0.866166	886	1	0.76603
Klhl9	1	0.94766	0.94796	0.994154	15207	0	0.76603	0.052342	0.052383	0.866166	887	1	0.76603
Setd1b	1	0.94766	0.94796	0.994154	15208	0	0.76603	0.052342	0.052383	0.866166	885	1	0.76603
Mep1b	1	0.94766	0.94796	0.994154	15209	0	0.76603	0.052342	0.052383	0.866166	889	1	0.76603
Mbd3	1	0.94766	0.94796	0.994154	15210	0	0.76603	0.052342	0.052383	0.866166	890	1	0.76603
Glyr1	1	0.94766	0.94796	0.994154	15211	0	0.76603	0.052342	0.052383	0.866166	836	1	0.76603
Gprin3	1	0.94766	0.94796	0.994154	15212	0	0.76603	0.052342	0.052383	0.866166	839	1	0.76603
Prrt1	1	0.94766	0.94796	0.994154	15213	0	0.76603	0.052342	0.052383	0.866166	838	1	0.76603
Tor4a	1	0.94766	0.94796	0.994154	15214	0	0.76603	0.052342	0.052383	0.866166	835	1	0.76603
Vsig4	1	0.94766	0.94796	0.994154	15215	0	0.76603	0.052342	0.052383	0.866166	834	1	0.76603
Fam98b	1	0.94766	0.94796	0.994154	15216	0	0.76603	0.052342	0.052383	0.866166	833	1	0.76603
Laptm4a	1	0.94766	0.94796	0.994154	15217	0	0.76603	0.052342	0.052383	0.866166	881	1	0.76603
NonTargetingControlGuideForMouse_0520	1	0.94766	0.94796	0.994154	15218	0	0.76603	0.052342	0.052383	0.866166	900	1	0.76603
Fads6	1	0.94766	0.94796	0.994154	15219	0	0.76603	0.052342	0.052383	0.866166	901	1	0.76603
Ccdc77	1	0.94766	0.94796	0.994154	15220	0	0.76603	0.052342	0.052383	0.866166	899	1	0.76603
Cnih4	1	0.94766	0.94796	0.994154	15221	0	0.76603	0.052342	0.052383	0.866166	891	1	0.76603
Enpp7	1	0.94766	0.94796	0.994154	15222	0	0.76603	0.052342	0.052383	0.866166	892	1	0.76603
Gm16381	1	0.94766	0.94796	0.994154	15223	0	0.76603	0.052342	0.052383	0.866166	896	1	0.76603
Dsel	1	0.94766	0.94796	0.994154	15224	0	0.76603	0.052342	0.052383	0.866166	884	1	0.76603
Ap1b1	1	0.94766	0.94796	0.994154	15225	0	0.76603	0.052342	0.052383	0.866166	882	1	0.76603
Gm5108	1	0.94766	0.94796	0.994154	15226	0	0.76603	0.052342	0.052383	0.866166	880	1	0.76603
Olfr639	1	0.94766	0.94796	0.994154	15227	0	0.76603	0.052342	0.052383	0.866166	897	1	0.76603
4930595M18Rik	1	0.94766	0.94796	0.994154	15228	0	0.76603	0.052342	0.052383	0.866166	898	1	0.76603
Esco1	1	0.94766	0.94796	0.994154	15229	0	0.76603	0.052342	0.052383	0.866166	883	1	0.76603
mmu-mir-7685	1	0.94315	0.94347	0.994154	15154	0	0.76209	0.056846	0.05677	0.866166	902	1	0.76209
Aldh6a1	1	0.94247	0.94279	0.994154	15143	0	0.76183	0.057532	0.057477	0.866166	911	1	0.76183
mmu-mir-151	1	0.94247	0.94279	0.994154	15144	0	0.76183	0.057532	0.057477	0.866166	909	1	0.76183
2210408I21Rik	1	0.94247	0.94279	0.994154	15145	0	0.76183	0.057532	0.057477	0.866166	913	1	0.76183
Adam19	1	0.94247	0.94279	0.994154	15146	0	0.76183	0.057532	0.057477	0.866166	907	1	0.76183
Magea2	1	0.94247	0.94279	0.994154	15147	0	0.76183	0.057532	0.057477	0.866166	905	1	0.76183
Rapsn	1	0.94247	0.94279	0.994154	15148	0	0.76183	0.057532	0.057477	0.866166	912	1	0.76183
mmu-mir-137	1	0.94247	0.94279	0.994154	15149	0	0.76183	0.057532	0.057477	0.866166	903	1	0.76183
mmu-mir-7043	1	0.94247	0.94279	0.994154	15150	0	0.76183	0.057532	0.057477	0.866166	908	1	0.76183
Fam64a	1	0.94247	0.94279	0.994154	15151	0	0.76183	0.057532	0.057477	0.866166	906	1	0.76183
Grip1	1	0.94247	0.94279	0.994154	15152	0	0.76183	0.057532	0.057477	0.866166	910	1	0.76183
Relb	1	0.94247	0.94279	0.994154	15153	0	0.76183	0.057532	0.057477	0.866166	904	1	0.76183
Ajap1	2	0.02592	0.04758	0.899505	621	1	-1.1252	0.057548	0.058479	0.866166	922	1	-1.1252
Gca	2	0.081275	0.14026	0.901639	1848	1	-0.81731	0.057548	0.058479	0.866166	926	1	-0.81731
Sdc2	2	0.13557	0.22391	0.921989	2958	1	-0.70891	0.057548	0.058479	0.866166	919	1	-0.70891
Tcl1b5	2	0.15097	0.24658	0.921989	3117	1	-0.65668	0.057548	0.058479	0.866166	930	1	-0.65668
Zwint	2	0.16712	0.27015	0.921989	3536	1	-0.90369	0.057548	0.058479	0.866166	924	1	-0.90369
Phyhip	2	0.18687	0.29805	0.921989	3709	1	-0.59407	0.057548	0.058479	0.866166	931	1	-0.59407
Kctd11	2	0.18687	0.29805	0.921989	3717	1	-0.59407	0.057548	0.058479	0.866166	944	1	-0.59407
Esp38	2	0.18687	0.29805	0.921989	3728	1	-0.59407	0.057548	0.058479	0.866166	941	1	-0.59407
mmu-mir-344e	2	0.23399	0.3626	0.921989	4705	1	-0.5255	0.057548	0.058479	0.866166	918	1	-0.5255
Olfr1097	2	0.23399	0.3626	0.921989	4709	1	-0.5255	0.057548	0.058479	0.866166	934	1	-0.5255
Ccdc181	2	0.29371	0.40931	0.921989	5737	1	-0.44972	0.057548	0.058479	0.866166	948	1	-0.44972
Psg25	2	0.29371	0.40931	0.921989	5811	1	-0.44972	0.057548	0.058479	0.866166	938	1	-0.44972
Rnf114	2	0.29371	0.40931	0.921989	5845	1	-0.44972	0.057548	0.058479	0.866166	932	1	-0.44972
Pwp1	2	0.37145	0.45682	0.921989	6825	1	-0.36504	0.057548	0.058479	0.866166	950	1	-0.36504
Sarnp	2	0.37145	0.45682	0.921989	6913	1	-0.36504	0.057548	0.058479	0.866166	940	1	-0.36504
Ccp110	2	0.469	0.52137	0.924505	8342	1	-0.26908	0.057548	0.058479	0.866166	956	1	-0.26908
Senp6	2	0.469	0.52137	0.924505	8465	1	-0.26908	0.057548	0.058479	0.866166	915	1	-0.26908
Ctsj	2	0.469	0.52137	0.924505	8466	1	-0.26908	0.057548	0.058479	0.866166	952	1	-0.26908
Sh3bgrl2	2	0.469	0.52137	0.924505	8560	1	-0.26908	0.057548	0.058479	0.866166	955	1	-0.26908
Ache	2	0.58004	0.6017	0.924505	9199	1	-0.15836	0.057548	0.058479	0.866166	949	1	-0.15836
Olfr828	2	0.58004	0.6017	0.924505	9230	1	-0.15836	0.057548	0.058479	0.866166	945	1	-0.15836
Olfr1276	2	0.58004	0.6017	0.924505	9487	1	-0.15836	0.057548	0.058479	0.866166	939	1	-0.15836
Mb21d1	2	0.58004	0.6017	0.924505	9526	1	-0.15836	0.057548	0.058479	0.866166	942	1	-0.15836
Hsf3	2	0.70463	0.70607	0.958804	11311	1	-0.027511	0.057548	0.058479	0.866166	935	1	-0.027511
mmu-mir-5627	2	0.70463	0.70607	0.958804	11462	1	-0.027511	0.057548	0.058479	0.866166	916	1	-0.027511
Rabl3	2	0.70463	0.70607	0.958804	11539	1	-0.027511	0.057548	0.058479	0.866166	936	1	-0.027511
Calcrl	2	0.70463	0.70607	0.958804	11645	1	-0.027511	0.057548	0.058479	0.866166	917	1	-0.027511
Smc1a	2	0.70463	0.70607	0.958804	11655	1	-0.027511	0.057548	0.058479	0.866166	920	1	-0.027511
Zscan4d	2	0.76638	0.76587	0.958804	12106	0	-0.074182	0.057548	0.058479	0.866166	937	1	-0.074182
Arhgap25	2	0.77871	0.7783	0.958804	12187	0	0.065197	0.057548	0.058479	0.866166	933	1	0.065197
Trp53tg5	2	0.78492	0.78438	0.958804	12231	0	0.20852	0.057548	0.058479	0.866166	929	1	0.20852
Klk1	2	0.83561	0.83526	0.973802	13532	0	0.13245	0.057548	0.058479	0.866166	923	1	0.13245
Scn4b	2	0.83561	0.83526	0.973802	13582	0	0.13245	0.057548	0.058479	0.866166	927	1	0.13245
Rsph1	2	0.83561	0.83526	0.973802	13635	0	0.13245	0.057548	0.058479	0.866166	925	1	0.13245
Hao2	2	0.83561	0.83526	0.973802	13782	0	0.13245	0.057548	0.058479	0.866166	947	1	0.13245
Kbtbd3	2	0.83561	0.83526	0.973802	13785	0	0.13245	0.057548	0.058479	0.866166	943	1	0.13245
Lsm2	2	0.95642	0.95651	0.994154	15294	0	0.3383	0.057548	0.058479	0.866166	954	1	0.3383
Tmem178	2	0.95642	0.95651	0.994154	15321	0	0.3383	0.057548	0.058479	0.866166	928	1	0.3383
Vmn1r167	2	0.95642	0.95651	0.994154	15353	0	0.3383	0.057548	0.058479	0.866166	914	1	0.3383
Coa4	2	0.95642	0.95651	0.994154	15400	0	0.3383	0.057548	0.058479	0.866166	951	1	0.3383
Hat1	2	0.98296	0.98298	0.998995	15875	0	0.5688	0.057548	0.058479	0.866166	953	1	0.5688
Allc	2	0.98629	0.98637	0.998995	15904	0	0.63685	0.057548	0.058479	0.866166	921	1	0.63685
Sec14l5	2	0.9959	0.99587	0.999584	16076	0	0.93504	0.057548	0.058479	0.866166	946	1	0.93504
Sirt6	4	0.33882	0.55216	0.924505	6119	2	-0.87753	0.057598	0.069678	0.866166	957	1	-0.87753
Vmn2r80	1	0.94186	0.94219	0.994154	15142	0	1.1474	0.058138	0.058096	0.866166	958	1	1.1474
Pex11g	1	0.94174	0.94207	0.994154	15141	0	1.137	0.058259	0.058199	0.866166	959	1	1.137
Nek8	1	0.94166	0.94199	0.994154	15140	0	1.0433	0.05834	0.058282	0.866166	960	1	1.0433
Gstm3	3	0.43495	0.59028	0.924505	7376	2	-1.3099	0.058377	0.063551	0.866166	962	1	-1.3099
Pex12	3	0.61306	0.7037	0.958804	10625	1	-0.99	0.058377	0.063551	0.866166	961	1	-0.99
mmu-mir-470	3	0.61306	0.7037	0.958804	10631	1	-0.57831	0.058377	0.063551	0.866166	963	1	-0.57831
2300002M23Rik	1	0.94162	0.94195	0.994154	15139	0	0.84216	0.05838	0.058322	0.866166	964	1	0.84216
Micall2	1	0.94101	0.94136	0.994154	15126	0	0.839	0.058986	0.058914	0.866166	965	1	0.839
Olfr112	1	0.94101	0.94136	0.994154	15127	0	0.839	0.058986	0.058914	0.866166	966	1	0.839
mmu-mir-6910	1	0.94101	0.94136	0.994154	15128	0	0.839	0.058986	0.058914	0.866166	975	1	0.839
Med24	1	0.94101	0.94136	0.994154	15129	0	0.839	0.058986	0.058914	0.866166	967	1	0.839
Pgls	1	0.94101	0.94136	0.994154	15130	0	0.839	0.058986	0.058914	0.866166	968	1	0.839
Csprs	1	0.94101	0.94136	0.994154	15131	0	0.839	0.058986	0.058914	0.866166	969	1	0.839
Folr2	1	0.94101	0.94136	0.994154	15132	0	0.839	0.058986	0.058914	0.866166	974	1	0.839
Olfr348	1	0.94101	0.94136	0.994154	15133	0	0.839	0.058986	0.058914	0.866166	970	1	0.839
Mctp1	1	0.94101	0.94136	0.994154	15134	0	0.839	0.058986	0.058914	0.866166	973	1	0.839
Slbp	1	0.94101	0.94136	0.994154	15135	0	0.839	0.058986	0.058914	0.866166	972	1	0.839
Ppib	1	0.94101	0.94136	0.994154	15136	0	0.839	0.058986	0.058914	0.866166	977	1	0.839
Ilvbl	1	0.94101	0.94136	0.994154	15137	0	0.839	0.058986	0.058914	0.866166	976	1	0.839
Trappc3	1	0.94101	0.94136	0.994154	15138	0	0.839	0.058986	0.058914	0.866166	971	1	0.839
Pgpep1	3	0.027069	0.068648	0.899505	636	2	-2.443	0.059076	0.064154	0.866166	978	1	-2.443
Ifitm6	4	0.096911	0.23114	0.921989	2036	1	-0.64249	0.059219	0.071078	0.866166	979	1	-0.64249
Znhit1	3	0.43495	0.59028	0.924505	7357	2	-1.3099	0.059483	0.064547	0.866166	980	1	-1.3099
Lcn9	1	0.94017	0.94051	0.994154	15118	0	0.88356	0.059834	0.059811	0.866166	986	1	0.88356
Adad1	1	0.94017	0.94051	0.994154	15119	0	0.88356	0.059834	0.059811	0.866166	981	1	0.88356
Cpsf3	1	0.94017	0.94051	0.994154	15120	0	0.88356	0.059834	0.059811	0.866166	984	1	0.88356
Tas2r144	1	0.94017	0.94051	0.994154	15121	0	0.88356	0.059834	0.059811	0.866166	985	1	0.88356
Ufd1l	1	0.94017	0.94051	0.994154	15122	0	0.88356	0.059834	0.059811	0.866166	988	1	0.88356
Olfr474	1	0.94017	0.94051	0.994154	15123	0	0.88356	0.059834	0.059811	0.866166	987	1	0.88356
Abcc1	1	0.94017	0.94051	0.994154	15124	0	0.88356	0.059834	0.059811	0.866166	982	1	0.88356
Ddx43	1	0.94017	0.94051	0.994154	15125	0	0.88356	0.059834	0.059811	0.866166	983	1	0.88356
Vma21	1	0.9398	0.94013	0.994154	15116	0	1.0478	0.060198	0.060175	0.866166	989	1	1.0478
Cmklr1	1	0.93966	0.93997	0.994154	15114	0	0.91259	0.060339	0.060311	0.866166	991	1	0.91259
Tmem115	1	0.93966	0.93997	0.994154	15115	0	0.91259	0.060339	0.060311	0.866166	990	1	0.91259
Dgkh	1	0.9394	0.93971	0.994154	15113	0	0.933	0.060602	0.060585	0.866166	992	1	0.933
Onecut1	1	0.93928	0.9396	0.994154	15112	0	1.0492	0.060723	0.060715	0.866166	993	1	1.0492
Jdp2	1	0.93924	0.93955	0.994154	15111	0	0.94814	0.060763	0.060747	0.866166	994	1	0.94814
Padi3	1	0.93912	0.93943	0.994154	15110	0	1.0805	0.060884	0.060869	0.866166	995	1	1.0805
Sspn	1	0.93908	0.93939	0.994154	15109	0	0.96899	0.060925	0.06091	0.866166	996	1	0.96899
L1cam	1	0.93903	0.93936	0.994154	15108	0	1.0422	0.060965	0.060944	0.866166	997	1	1.0422
Kcna6	1	0.93883	0.93916	0.994154	15106	0	0.87213	0.061167	0.061146	0.866166	998	1	0.87213
Plxna1	1	0.93871	0.93904	0.994154	15105	0	0.84832	0.061288	0.061264	0.866166	999	1	0.84832
Fam3c	1	0.93851	0.93885	0.994154	15104	0	0.81714	0.06149	0.06145	0.866166	1000	1	0.81714
Ros1	1	0.93839	0.93874	0.994154	15103	0	0.90287	0.061611	0.061568	0.866166	1001	1	0.90287
2310042D19Rik	1	0.93807	0.93839	0.994154	15101	0	0.77454	0.061935	0.061891	0.866166	1003	1	0.77454
Acap3	1	0.93807	0.93839	0.994154	15102	0	0.77454	0.061935	0.061891	0.866166	1002	1	0.77454
NonTargetingControlGuideForMouse_0056	1	0.93778	0.9381	0.994154	15100	0	1.0014	0.062217	0.062178	0.866166	1004	0	1.0014
Pkp1	1	0.93732	0.93763	0.994154	15092	0	0.7128	0.062682	0.062616	0.866166	1011	0	0.7128
Rb1	1	0.93732	0.93763	0.994154	15093	0	0.7128	0.062682	0.062616	0.866166	1006	0	0.7128
N6amt1	1	0.93732	0.93763	0.994154	15094	0	0.7128	0.062682	0.062616	0.866166	1009	0	0.7128
Gm16432	1	0.93732	0.93763	0.994154	15095	0	0.7128	0.062682	0.062616	0.866166	1008	0	0.7128
NonTargetingControlGuideForMouse_0928	1	0.93732	0.93763	0.994154	15096	0	0.7128	0.062682	0.062616	0.866166	1005	0	0.7128
Sik2	1	0.93732	0.93763	0.994154	15097	0	0.7128	0.062682	0.062616	0.866166	1010	0	0.7128
Adssl1	1	0.93732	0.93763	0.994154	15098	0	0.7128	0.062682	0.062616	0.866166	1012	0	0.7128
Cmss1	1	0.93732	0.93763	0.994154	15099	0	0.7128	0.062682	0.062616	0.866166	1007	0	0.7128
Olfr139	1	0.93685	0.93718	0.994154	15091	0	0.78299	0.063146	0.063094	0.866166	1013	0	0.78299
Fscn1	2	0.37145	0.45682	0.921989	6891	1	-0.36738	0.063225	0.063961	0.866166	1016	1	-0.36738
Tmem8c	2	0.58004	0.6017	0.924505	9228	1	-0.1607	0.063225	0.063961	0.866166	1014	1	-0.1607
Tas2r140	2	0.58004	0.6017	0.924505	9305	1	-0.1607	0.063225	0.063961	0.866166	1015	1	-0.1607
Aass	1	0.93673	0.93705	0.994154	15090	0	0.74107	0.063267	0.063217	0.866166	1017	0	0.74107
NonTargetingControlGuideForMouse_0254	1	0.93669	0.93701	0.994154	15089	0	0.74057	0.063308	0.06326	0.866166	1018	0	0.74057
D17Wsu92e	1	0.93665	0.93696	0.994154	15088	0	0.81427	0.063348	0.063301	0.866166	1019	0	0.81427
Wscd2	2	0.02592	0.04758	0.899505	628	1	-0.99094	0.063655	0.064367	0.866166	1022	1	-0.99094
Casp8ap2	2	0.89637	0.8962	0.994154	14493	0	0.37944	0.063655	0.064367	0.866166	1021	1	0.37944
mmu-mir-93	2	0.98825	0.98827	0.998995	15943	0	0.77219	0.063655	0.064367	0.866166	1020	1	0.77219
Ptgir	1	0.93597	0.93627	0.994154	15079	0	0.61518	0.064035	0.064006	0.866166	1026	0	0.61518
Cyp26a1	1	0.93597	0.93627	0.994154	15080	0	0.61518	0.064035	0.064006	0.866166	1028	0	0.61518
Pcyt1a	1	0.93597	0.93627	0.994154	15081	0	0.61518	0.064035	0.064006	0.866166	1031	0	0.61518
Upf1	1	0.93597	0.93627	0.994154	15082	0	0.61518	0.064035	0.064006	0.866166	1027	0	0.61518
Armc4	1	0.93597	0.93627	0.994154	15083	0	0.61518	0.064035	0.064006	0.866166	1030	0	0.61518
Tpp1	1	0.93597	0.93627	0.994154	15084	0	0.61518	0.064035	0.064006	0.866166	1023	0	0.61518
Rhox7	1	0.93597	0.93627	0.994154	15085	0	0.61518	0.064035	0.064006	0.866166	1024	0	0.61518
Iqgap2	1	0.93597	0.93627	0.994154	15086	0	0.61518	0.064035	0.064006	0.866166	1025	0	0.61518
S1pr3	1	0.93597	0.93627	0.994154	15087	0	0.61518	0.064035	0.064006	0.866166	1029	0	0.61518
Timm13	1	0.93536	0.93568	0.994154	15078	0	0.79832	0.064641	0.064636	0.866166	1032	0	0.79832
Rbm47	2	0.37145	0.45682	0.921989	6925	1	-0.36714	0.064709	0.065392	0.866166	1037	1	-0.36714
Cd248	2	0.469	0.52137	0.924505	8382	1	-0.27118	0.064709	0.065392	0.866166	1034	1	-0.27118
Morc1	2	0.58004	0.6017	0.924505	9392	1	-0.16046	0.064709	0.065392	0.866166	1036	1	-0.16046
Prss36	2	0.70463	0.70607	0.958804	11295	1	-0.029612	0.064709	0.065392	0.866166	1039	1	-0.029612
Cog8	2	0.78208	0.78159	0.958804	12204	0	0.057102	0.064709	0.065392	0.866166	1035	1	0.057102
2510049J12Rik	2	0.95642	0.95651	0.994154	15331	0	0.3362	0.064709	0.065392	0.866166	1038	1	0.3362
Cadps2	2	0.95642	0.95651	0.994154	15498	0	0.3362	0.064709	0.065392	0.866166	1033	1	0.3362
Creg1	1	0.935	0.93534	0.994154	15077	0	0.78299	0.065004	0.065005	0.866166	1040	0	0.78299
Top1	1	0.93496	0.93529	0.994154	15076	0	0.84998	0.065044	0.065042	0.866166	1041	0	0.84998
Il19	1	0.93487	0.9352	0.994154	15075	0	0.8261	0.065125	0.065125	0.866166	1042	0	0.8261
1200014J11Rik	1	0.93453	0.93485	0.994154	15074	0	0.62523	0.065468	0.065481	0.866166	1043	0	0.62523
Siglech	1	0.93443	0.93475	0.994154	15073	0	0.71386	0.065569	0.065578	0.866166	1044	0	0.71386
Ceacam9	2	0.469	0.52137	0.924505	8442	1	-0.13647	0.065647	0.066288	0.866166	1045	1	-0.13647
Pcdhb15	1	0.93421	0.93453	0.994154	15070	0	0.62187	0.065792	0.065805	0.866166	1047	0	0.62187
Umps	1	0.93421	0.93453	0.994154	15071	0	0.62187	0.065792	0.065805	0.866166	1046	0	0.62187
Col6a4	1	0.93421	0.93453	0.994154	15072	0	0.62187	0.065792	0.065805	0.866166	1048	0	0.62187
Nup205	2	0.83561	0.83526	0.973802	13614	0	0.27944	0.065803	0.066436	0.866166	1049	1	0.27944
Ear14	3	0.068279	0.15835	0.901639	1472	2	-2.1543	0.065807	0.070272	0.866166	1050	1	-2.1543
Papd4	3	0.079977	0.18219	0.901639	1844	2	-1.7931	0.065807	0.070272	0.866166	1066	1	-1.7931
Senp7	3	0.084883	0.19183	0.901639	1893	2	-2.443	0.065807	0.070272	0.866166	1053	1	-2.443
Cblb	3	0.26677	0.41845	0.921989	4984	1	-0.99	0.065807	0.070272	0.866166	1068	1	-0.99
Car6	3	0.43495	0.59028	0.924505	7414	2	-1.3099	0.065807	0.070272	0.866166	1058	1	-1.3099
Nvl	3	0.50168	0.65562	0.958804	8674	1	0.021002	0.065807	0.070272	0.866166	1064	1	0.021002
Paip2b	3	0.61306	0.7037	0.958804	10660	1	-0.3798	0.065807	0.070272	0.866166	1052	1	-0.3798
Aqr	3	0.65884	0.72606	0.958804	10873	1	-1.1563	0.065807	0.070272	0.866166	1057	1	-1.1563
Aimp2	3	0.68074	0.73745	0.958804	11060	1	-0.57831	0.065807	0.070272	0.866166	1060	1	-0.57831
N4bp2l1	3	0.72785	0.76399	0.958804	11923	1	0.033561	0.065807	0.070272	0.866166	1067	1	0.033561
Sh2d1a	3	0.72785	0.76399	0.958804	11961	1	-0.57831	0.065807	0.070272	0.866166	1055	1	-0.57831
Osgep	3	0.72785	0.76399	0.958804	11976	1	-0.30543	0.065807	0.070272	0.866166	1061	1	-0.30543
Mpl	3	0.83947	0.84215	0.97445	13900	1	-0.57831	0.065807	0.070272	0.866166	1051	1	-0.57831
Exoc4	3	0.83947	0.84215	0.97445	13951	1	-0.57831	0.065807	0.070272	0.866166	1056	1	-0.57831
Cnga1	3	0.83947	0.84215	0.97445	13954	1	0.44108	0.065807	0.070272	0.866166	1054	1	0.44108
Olfr835	3	0.90277	0.90279	0.994154	14591	0	-0.99	0.065807	0.070272	0.866166	1065	1	-0.99
Hbb-b1	3	0.93335	0.93355	0.994154	15024	0	-0.57831	0.065807	0.070272	0.866166	1063	1	-0.57831
Palb2	3	0.93335	0.93355	0.994154	15030	0	-0.97843	0.065807	0.070272	0.866166	1062	1	-0.97843
Zfp143	3	0.96255	0.96277	0.995787	15603	0	-0.57831	0.065807	0.070272	0.866166	1059	1	-0.57831
Gm362	2	0.98455	0.98462	0.998995	15890	0	0.77	0.066037	0.066665	0.866166	1069	1	0.77
Cmtm1	1	0.93395	0.93426	0.994154	15069	0	0.72068	0.066054	0.066078	0.866166	1070	0	0.72068
Olfr618	2	0.37145	0.45682	0.921989	6964	1	-0.21284	0.066154	0.066772	0.866166	1071	1	-0.21284
Ict1	2	0.83561	0.83526	0.973802	13591	0	0.40909	0.066349	0.066954	0.866166	1072	1	0.40909
Olfr527	2	0.469	0.52137	0.924505	8587	1	-0.21791	0.066427	0.067028	0.866166	1073	1	-0.21791
mmu-mir-669l	2	0.70463	0.70607	0.958804	11634	1	0.023114	0.066817	0.067414	0.866166	1075	1	0.023114
Chrnb1	2	0.78848	0.78803	0.958804	12251	0	0.15175	0.066817	0.067414	0.866166	1074	1	0.15175
Ggt5	2	0.12314	0.20528	0.901639	2439	1	-0.50078	0.067286	0.067884	0.866166	1076	1	-0.50078
Olfr1471	2	0.83561	0.83526	0.973802	13410	0	0.23243	0.067949	0.068517	0.866166	1077	1	0.23243
Dnm1	2	0.58004	0.6017	0.924505	9262	1	-0.068455	0.068845	0.069443	0.866166	1078	1	-0.068455
Gm10406	2	0.91165	0.91155	0.994154	14714	0	0.43357	0.068923	0.069526	0.866166	1079	1	0.43357
Cdk2ap1	2	0.83561	0.83526	0.973802	13430	0	0.15513	0.069313	0.069918	0.866166	1080	1	0.15513
A530016L24Rik	2	0.58004	0.6017	0.924505	9155	1	-0.18407	0.069741	0.070324	0.866166	1081	1	-0.18407
Olfr853	2	0.83561	0.83526	0.973802	13743	0	0.10674	0.069741	0.070324	0.866166	1082	1	0.10674
Dnajc5	1	0.93013	0.93045	0.994154	14917	0	0.44108	0.069871	0.069839	0.866166	1139	0	0.44108
Zmat4	1	0.93013	0.93045	0.994154	14918	0	0.44108	0.069871	0.069839	0.866166	1138	0	0.44108
Elf1	1	0.93013	0.93045	0.994154	14919	0	0.44108	0.069871	0.069839	0.866166	1142	0	0.44108
Rhox3h	1	0.93013	0.93045	0.994154	14920	0	0.44108	0.069871	0.069839	0.866166	1123	0	0.44108
Pusl1	1	0.93013	0.93045	0.994154	14921	0	0.44108	0.069871	0.069839	0.866166	1125	0	0.44108
Mvk	1	0.93013	0.93045	0.994154	14922	0	0.44108	0.069871	0.069839	0.866166	1126	0	0.44108
Rhox13	1	0.93013	0.93045	0.994154	14923	0	0.44108	0.069871	0.069839	0.866166	1134	0	0.44108
Ces2f	1	0.93013	0.93045	0.994154	14924	0	0.44108	0.069871	0.069839	0.866166	1132	0	0.44108
Eif4e2	1	0.93013	0.93045	0.994154	14925	0	0.44108	0.069871	0.069839	0.866166	1107	0	0.44108
Popdc2	1	0.93013	0.93045	0.994154	14926	0	0.44108	0.069871	0.069839	0.866166	1135	0	0.44108
Ttc7b	1	0.93013	0.93045	0.994154	14927	0	0.44108	0.069871	0.069839	0.866166	1130	0	0.44108
Slc39a13	1	0.93013	0.93045	0.994154	14928	0	0.44108	0.069871	0.069839	0.866166	1124	0	0.44108
mmu-mir-7119	1	0.93013	0.93045	0.994154	14929	0	0.44108	0.069871	0.069839	0.866166	1129	0	0.44108
Mrpl9	1	0.93013	0.93045	0.994154	14930	0	0.44108	0.069871	0.069839	0.866166	1128	0	0.44108
Kcnj14	1	0.93013	0.93045	0.994154	14931	0	0.44108	0.069871	0.069839	0.866166	1121	0	0.44108
Gm16445	1	0.93013	0.93045	0.994154	14932	0	0.44108	0.069871	0.069839	0.866166	1117	0	0.44108
Igip	1	0.93013	0.93045	0.994154	14933	0	0.44108	0.069871	0.069839	0.866166	1106	0	0.44108
Ajuba	1	0.93013	0.93045	0.994154	14934	0	0.44108	0.069871	0.069839	0.866166	1115	0	0.44108
Krt77	1	0.93013	0.93045	0.994154	14935	0	0.44108	0.069871	0.069839	0.866166	1151	0	0.44108
Ccdc89	1	0.93013	0.93045	0.994154	14936	0	0.44108	0.069871	0.069839	0.866166	1154	0	0.44108
Tmed8	1	0.93013	0.93045	0.994154	14937	0	0.44108	0.069871	0.069839	0.866166	1153	0	0.44108
Atp6v0c	1	0.93013	0.93045	0.994154	14938	0	0.44108	0.069871	0.069839	0.866166	1122	0	0.44108
Rab39b	1	0.93013	0.93045	0.994154	14939	0	0.44108	0.069871	0.069839	0.866166	1137	0	0.44108
Enpp3	1	0.93013	0.93045	0.994154	14940	0	0.44108	0.069871	0.069839	0.866166	1141	0	0.44108
Pacs2	1	0.93013	0.93045	0.994154	14941	0	0.44108	0.069871	0.069839	0.866166	1108	0	0.44108
Dsc1	1	0.93013	0.93045	0.994154	14942	0	0.44108	0.069871	0.069839	0.866166	1102	0	0.44108
Ifnar1	1	0.93013	0.93045	0.994154	14943	0	0.44108	0.069871	0.069839	0.866166	1103	0	0.44108
mmu-mir-431	1	0.93013	0.93045	0.994154	14944	0	0.44108	0.069871	0.069839	0.866166	1111	0	0.44108
Zfp3	1	0.93013	0.93045	0.994154	14945	0	0.44108	0.069871	0.069839	0.866166	1109	0	0.44108
Tpst1	1	0.93013	0.93045	0.994154	14946	0	0.44108	0.069871	0.069839	0.866166	1086	0	0.44108
Tmed5	1	0.93013	0.93045	0.994154	14947	0	0.44108	0.069871	0.069839	0.866166	1152	0	0.44108
Phospho2	1	0.93013	0.93045	0.994154	14948	0	0.44108	0.069871	0.069839	0.866166	1085	0	0.44108
Odf3l1	1	0.93013	0.93045	0.994154	14949	0	0.44108	0.069871	0.069839	0.866166	1089	0	0.44108
mmu-mir-7a-2	1	0.93013	0.93045	0.994154	14950	0	0.44108	0.069871	0.069839	0.866166	1084	0	0.44108
Olfr120	1	0.93013	0.93045	0.994154	14951	0	0.44108	0.069871	0.069839	0.866166	1148	0	0.44108
Capn9	1	0.93013	0.93045	0.994154	14952	0	0.44108	0.069871	0.069839	0.866166	1114	0	0.44108
Adprm	1	0.93013	0.93045	0.994154	14953	0	0.44108	0.069871	0.069839	0.866166	1119	0	0.44108
Rusc2	1	0.93013	0.93045	0.994154	14954	0	0.44108	0.069871	0.069839	0.866166	1145	0	0.44108
Gramd3	1	0.93013	0.93045	0.994154	14955	0	0.44108	0.069871	0.069839	0.866166	1149	0	0.44108
Gale	1	0.93013	0.93045	0.994154	14956	0	0.44108	0.069871	0.069839	0.866166	1146	0	0.44108
Dock7	1	0.93013	0.93045	0.994154	14957	0	0.44108	0.069871	0.069839	0.866166	1088	0	0.44108
mmu-mir-1839	1	0.93013	0.93045	0.994154	14958	0	0.44108	0.069871	0.069839	0.866166	1098	0	0.44108
Tmem239	1	0.93013	0.93045	0.994154	14959	0	0.44108	0.069871	0.069839	0.866166	1093	0	0.44108
Pou3f1	1	0.93013	0.93045	0.994154	14960	0	0.44108	0.069871	0.069839	0.866166	1094	0	0.44108
mmu-mir-7117	1	0.93013	0.93045	0.994154	14961	0	0.44108	0.069871	0.069839	0.866166	1092	0	0.44108
Mdm2	1	0.93013	0.93045	0.994154	14962	0	0.44108	0.069871	0.069839	0.866166	1095	0	0.44108
Krt33b	1	0.93013	0.93045	0.994154	14963	0	0.44108	0.069871	0.069839	0.866166	1096	0	0.44108
Rnh1	1	0.93013	0.93045	0.994154	14964	0	0.44108	0.069871	0.069839	0.866166	1083	0	0.44108
Clk2	1	0.93013	0.93045	0.994154	14965	0	0.44108	0.069871	0.069839	0.866166	1087	0	0.44108
Ufc1	1	0.93013	0.93045	0.994154	14966	0	0.44108	0.069871	0.069839	0.866166	1090	0	0.44108
Camkmt	1	0.93013	0.93045	0.994154	14967	0	0.44108	0.069871	0.069839	0.866166	1099	0	0.44108
Izumo1	1	0.93013	0.93045	0.994154	14968	0	0.44108	0.069871	0.069839	0.866166	1097	0	0.44108
Pin1rt1	1	0.93013	0.93045	0.994154	14969	0	0.44108	0.069871	0.069839	0.866166	1120	0	0.44108
Dfnb59	1	0.93013	0.93045	0.994154	14970	0	0.44108	0.069871	0.069839	0.866166	1131	0	0.44108
Stat5a	1	0.93013	0.93045	0.994154	14971	0	0.44108	0.069871	0.069839	0.866166	1113	0	0.44108
Fer1l4	1	0.93013	0.93045	0.994154	14972	0	0.44108	0.069871	0.069839	0.866166	1116	0	0.44108
Zfp963	1	0.93013	0.93045	0.994154	14973	0	0.44108	0.069871	0.069839	0.866166	1112	0	0.44108
Ttc33	1	0.93013	0.93045	0.994154	14974	0	0.44108	0.069871	0.069839	0.866166	1101	0	0.44108
N28178	1	0.93013	0.93045	0.994154	14975	0	0.44108	0.069871	0.069839	0.866166	1104	0	0.44108
Actr3b	1	0.93013	0.93045	0.994154	14976	0	0.44108	0.069871	0.069839	0.866166	1110	0	0.44108
Haus6	1	0.93013	0.93045	0.994154	14977	0	0.44108	0.069871	0.069839	0.866166	1118	0	0.44108
Lin28a	1	0.93013	0.93045	0.994154	14978	0	0.44108	0.069871	0.069839	0.866166	1143	0	0.44108
Mgat4a	1	0.93013	0.93045	0.994154	14979	0	0.44108	0.069871	0.069839	0.866166	1147	0	0.44108
Alox5ap	1	0.93013	0.93045	0.994154	14980	0	0.44108	0.069871	0.069839	0.866166	1155	0	0.44108
Rab17	1	0.93013	0.93045	0.994154	14981	0	0.44108	0.069871	0.069839	0.866166	1127	0	0.44108
Lrrc40	1	0.93013	0.93045	0.994154	14982	0	0.44108	0.069871	0.069839	0.866166	1136	0	0.44108
Hipk2	1	0.93013	0.93045	0.994154	14983	0	0.44108	0.069871	0.069839	0.866166	1140	0	0.44108
Stxbp2	1	0.93013	0.93045	0.994154	14984	0	0.44108	0.069871	0.069839	0.866166	1105	0	0.44108
Rgs7	1	0.93013	0.93045	0.994154	14985	0	0.44108	0.069871	0.069839	0.866166	1133	0	0.44108
Suv39h1	1	0.93013	0.93045	0.994154	14986	0	0.44108	0.069871	0.069839	0.866166	1150	0	0.44108
Ranbp3	1	0.93013	0.93045	0.994154	14987	0	0.44108	0.069871	0.069839	0.866166	1156	0	0.44108
mmu-mir-6940	1	0.93013	0.93045	0.994154	14988	0	0.44108	0.069871	0.069839	0.866166	1144	0	0.44108
Ccdc158	1	0.93013	0.93045	0.994154	14989	0	0.44108	0.069871	0.069839	0.866166	1100	0	0.44108
Tbc1d12	1	0.93013	0.93045	0.994154	14990	0	0.44108	0.069871	0.069839	0.866166	1157	0	0.44108
mmu-mir-9-3	1	0.93013	0.93045	0.994154	14991	0	0.44108	0.069871	0.069839	0.866166	1091	0	0.44108
Pianp	3	0.042823	0.10435	0.901639	907	2	-2.3059	0.071931	0.075893	0.866166	1158	1	-2.3059
Ttc1	3	0.025527	0.065049	0.899505	616	1	-0.99	0.073141	0.077025	0.866166	1161	1	-0.99
Fam203a	3	0.027069	0.068648	0.899505	639	2	-2.443	0.073141	0.077025	0.866166	1160	1	-2.443
Bambi	3	0.96572	0.96588	0.996538	15629	0	0.44108	0.073141	0.077025	0.866166	1159	1	0.44108
Rbm26	1	0.92639	0.92682	0.994154	14908	0	0.43944	0.073607	0.07356	0.866166	1162	0	0.43944
Lrriq4	1	0.92613	0.92658	0.994154	14906	0	0.43779	0.073869	0.0738	0.866166	1163	0	0.43779
Intu	1	0.92613	0.92658	0.994154	14907	0	0.43779	0.073869	0.0738	0.866166	1164	0	0.43779
Cyp2a22	1	0.92524	0.92575	0.994154	14891	0	0.43688	0.074758	0.074696	0.866166	1171	0	0.43688
Sprr2b	1	0.92524	0.92575	0.994154	14892	0	0.43688	0.074758	0.074696	0.866166	1175	0	0.43688
Stat3	1	0.92524	0.92575	0.994154	14893	0	0.43688	0.074758	0.074696	0.866166	1165	0	0.43688
Taar8a	1	0.92524	0.92575	0.994154	14894	0	0.43688	0.074758	0.074696	0.866166	1170	0	0.43688
Tspan9	1	0.92524	0.92575	0.994154	14895	0	0.43688	0.074758	0.074696	0.866166	1166	0	0.43688
Nubp2	1	0.92524	0.92575	0.994154	14896	0	0.43688	0.074758	0.074696	0.866166	1167	0	0.43688
Ppp1ca	1	0.92524	0.92575	0.994154	14897	0	0.43688	0.074758	0.074696	0.866166	1174	0	0.43688
Ugt3a2	1	0.92524	0.92575	0.994154	14898	0	0.43688	0.074758	0.074696	0.866166	1168	0	0.43688
mmu-mir-5617	1	0.92524	0.92575	0.994154	14899	0	0.43688	0.074758	0.074696	0.866166	1169	0	0.43688
Rpa2	1	0.92524	0.92575	0.994154	14900	0	0.43688	0.074758	0.074696	0.866166	1176	0	0.43688
Ckap4	1	0.92524	0.92575	0.994154	14901	0	0.43688	0.074758	0.074696	0.866166	1172	0	0.43688
Pcgf2	1	0.92524	0.92575	0.994154	14902	0	0.43688	0.074758	0.074696	0.866166	1173	0	0.43688
Fam160a1	3	0.1094	0.2386	0.921989	2338	1	-0.57831	0.074925	0.078691	0.866166	1177	1	-0.57831
Fam84b	3	0.13958	0.28289	0.921989	2984	2	-2.4617	0.074925	0.078691	0.866166	1178	1	-2.4617
Apoa4	1	0.92445	0.92498	0.994154	14884	0	0.62521	0.075545	0.075483	0.866166	1179	0	0.62521
Fubp1	1	0.92445	0.92498	0.994154	14885	0	0.62521	0.075545	0.075483	0.866166	1180	0	0.62521
mmu-mir-7674	1	0.92427	0.9248	0.994154	14883	0	0.43359	0.075727	0.075663	0.866166	1181	0	0.43359
Map2k4	1	0.92393	0.92446	0.994154	14881	0	0.66526	0.07607	0.076025	0.866166	1182	0	0.66526
4833423E24Rik	1	0.92389	0.92441	0.994154	14880	0	0.6629	0.076111	0.076064	0.866166	1183	0	0.6629
Slc31a2	3	0.43495	0.59028	0.924505	7431	2	-1.3099	0.076477	0.080191	0.866166	1185	1	-1.3099
Igdcc3	3	0.93335	0.93355	0.994154	15056	0	-0.99	0.076477	0.080191	0.866166	1184	1	-0.99
Ppan	1	0.92345	0.92396	0.994154	14873	0	0.51908	0.076555	0.076524	0.866166	1187	0	0.51908
Oxnad1	1	0.92345	0.92396	0.994154	14874	0	0.51908	0.076555	0.076524	0.866166	1191	0	0.51908
Gpsm1	1	0.92345	0.92396	0.994154	14875	0	0.51908	0.076555	0.076524	0.866166	1190	0	0.51908
Nisch	1	0.92345	0.92396	0.994154	14876	0	0.51908	0.076555	0.076524	0.866166	1188	0	0.51908
Cox8b	1	0.92345	0.92396	0.994154	14877	0	0.51908	0.076555	0.076524	0.866166	1189	0	0.51908
Csnka2ip	1	0.92345	0.92396	0.994154	14878	0	0.51908	0.076555	0.076524	0.866166	1186	0	0.51908
D830030K20Rik	2	0.017812	0.033032	0.899505	409	1	-1.3514	0.076934	0.077361	0.866166	1227	1	-1.3514
Tmprss12	2	0.081275	0.14026	0.901639	1855	1	-0.92922	0.076934	0.077361	0.866166	1258	1	-0.92922
Fam47c	2	0.089656	0.15366	0.901639	1957	1	-1.0224	0.076934	0.077361	0.866166	1235	1	-1.0224
Chsy1	2	0.099532	0.16922	0.901639	2231	1	-0.87955	0.076934	0.077361	0.866166	1265	1	-0.87955
Trim40	2	0.12314	0.20528	0.901639	2417	1	-0.8262	0.076934	0.077361	0.866166	1256	1	-0.8262
3632451O06Rik	2	0.15097	0.24658	0.921989	3120	1	-0.76859	0.076934	0.077361	0.866166	1254	1	-0.76859
Leprot	2	0.18687	0.29805	0.921989	3716	1	-0.70598	0.076934	0.077361	0.866166	1245	1	-0.70598
Ptpn1	2	0.18687	0.29805	0.921989	3723	1	-0.70598	0.076934	0.077361	0.866166	1249	1	-0.70598
Kdm4d	2	0.18687	0.29805	0.921989	3746	1	-0.70598	0.076934	0.077361	0.866166	1209	1	-0.70598
Serinc1	2	0.18687	0.29805	0.921989	3786	1	-0.70598	0.076934	0.077361	0.866166	1216	1	-0.70598
Mrpl22	2	0.21184	0.33264	0.921989	4609	1	-0.94272	0.076934	0.077361	0.866166	1260	1	-0.94272
Emilin1	2	0.29371	0.40931	0.921989	5691	1	-0.56163	0.076934	0.077361	0.866166	1264	1	-0.56163
Noa1	2	0.29371	0.40931	0.921989	5775	1	-0.56163	0.076934	0.077361	0.866166	1240	1	-0.56163
4932438A13Rik	2	0.29371	0.40931	0.921989	5779	1	-0.56163	0.076934	0.077361	0.866166	1236	1	-0.56163
Mucl1	2	0.32204	0.4261	0.921989	6025	1	-0.56023	0.076934	0.077361	0.866166	1194	1	-0.56023
Crlf1	2	0.37145	0.45682	0.921989	6800	1	-0.47695	0.076934	0.077361	0.866166	1228	1	-0.47695
Col5a2	2	0.37145	0.45682	0.921989	6861	1	-0.47695	0.076934	0.077361	0.866166	1262	1	-0.47695
Cyb5d1	2	0.37145	0.45682	0.921989	6865	1	-0.47695	0.076934	0.077361	0.866166	1239	1	-0.47695
Tmem174	2	0.37145	0.45682	0.921989	6914	1	-0.47695	0.076934	0.077361	0.866166	1241	1	-0.47695
Usp10	2	0.469	0.52137	0.924505	8350	1	-0.38099	0.076934	0.077361	0.866166	1221	1	-0.38099
Vmn1r83	2	0.469	0.52137	0.924505	8398	1	-0.38099	0.076934	0.077361	0.866166	1246	1	-0.38099
Aoc3	2	0.469	0.52137	0.924505	8467	1	-0.38099	0.076934	0.077361	0.866166	1201	1	-0.38099
mmu-mir-187	2	0.469	0.52137	0.924505	8477	1	-0.38099	0.076934	0.077361	0.866166	1242	1	-0.38099
Pde11a	2	0.469	0.52137	0.924505	8506	1	-0.38099	0.076934	0.077361	0.866166	1212	1	-0.38099
mmu-mir-673	2	0.469	0.52137	0.924505	8516	1	-0.38099	0.076934	0.077361	0.866166	1206	1	-0.38099
Evc2	2	0.469	0.52137	0.924505	8590	1	-0.38099	0.076934	0.077361	0.866166	1204	1	-0.38099
Trp73	2	0.51477	0.55333	0.924505	8823	1	-0.60545	0.076934	0.077361	0.866166	1259	1	-0.60545
Myc	2	0.53095	0.56508	0.924505	9036	1	-0.49476	0.076934	0.077361	0.866166	1208	1	-0.49476
mmu-let-7f-2	2	0.58004	0.6017	0.924505	9249	1	-0.27027	0.076934	0.077361	0.866166	1250	1	-0.27027
Vamp1	2	0.58004	0.6017	0.924505	9399	1	-0.27027	0.076934	0.077361	0.866166	1255	1	-0.27027
Armcx1	2	0.58004	0.6017	0.924505	9414	1	-0.27027	0.076934	0.077361	0.866166	1253	1	-0.27027
Lsm7	2	0.64538	0.65417	0.958804	10747	1	-0.27138	0.076934	0.077361	0.866166	1207	1	-0.27138
Coa6	2	0.70463	0.70607	0.958804	11356	1	-0.13942	0.076934	0.077361	0.866166	1203	1	-0.13942
Mmp21	2	0.70463	0.70607	0.958804	11473	1	-0.13942	0.076934	0.077361	0.866166	1231	1	-0.13942
Pank1	2	0.70463	0.70607	0.958804	11656	1	-0.13942	0.076934	0.077361	0.866166	1238	1	-0.13942
4921509C19Rik	2	0.70463	0.70607	0.958804	11658	1	-0.13942	0.076934	0.077361	0.866166	1200	1	-0.13942
Sesn1	2	0.77462	0.77423	0.958804	12158	0	-0.1231	0.076934	0.077361	0.866166	1196	1	-0.1231
Selt	2	0.83561	0.83526	0.973802	13393	0	0.020536	0.076934	0.077361	0.866166	1224	1	0.020536
Olfr97	2	0.83561	0.83526	0.973802	13429	0	0.020536	0.076934	0.077361	0.866166	1237	1	0.020536
Krtdap	2	0.83561	0.83526	0.973802	13489	0	0.020536	0.076934	0.077361	0.866166	1220	1	0.020536
mmu-mir-182	2	0.83561	0.83526	0.973802	13492	0	0.020536	0.076934	0.077361	0.866166	1230	1	0.020536
Dmrtb1	2	0.83561	0.83526	0.973802	13524	0	0.020536	0.076934	0.077361	0.866166	1198	1	0.020536
Saa1	2	0.83561	0.83526	0.973802	13572	0	0.020536	0.076934	0.077361	0.866166	1211	1	0.020536
Mis18bp1	2	0.83561	0.83526	0.973802	13576	0	0.020536	0.076934	0.077361	0.866166	1199	1	0.020536
Pla2g4e	2	0.83561	0.83526	0.973802	13679	0	0.020536	0.076934	0.077361	0.866166	1247	1	0.020536
Olfr792	2	0.83561	0.83526	0.973802	13704	0	0.020536	0.076934	0.077361	0.866166	1223	1	0.020536
Vdr	2	0.83561	0.83526	0.973802	13705	0	0.020536	0.076934	0.077361	0.866166	1251	1	0.020536
Nek7	2	0.83561	0.83526	0.973802	13740	0	0.020536	0.076934	0.077361	0.866166	1193	1	0.020536
Sp110	2	0.83561	0.83526	0.973802	13799	0	0.020536	0.076934	0.077361	0.866166	1202	1	0.020536
Myl6b	2	0.83561	0.83526	0.973802	13839	0	0.020536	0.076934	0.077361	0.866166	1197	1	0.020536
Prl7b1	2	0.87818	0.87808	0.994154	14185	0	0.31809	0.076934	0.077361	0.866166	1234	1	0.31809
Dst	2	0.89156	0.89132	0.994154	14352	0	0.084338	0.076934	0.077361	0.866166	1232	1	0.084338
Vmn1r56	2	0.89598	0.89579	0.994154	14488	0	0.13572	0.076934	0.077361	0.866166	1257	1	0.13572
Drd3	2	0.8979	0.89776	0.994154	14520	0	0.14716	0.076934	0.077361	0.866166	1248	1	0.14716
Wasl	2	0.89803	0.89789	0.994154	14521	0	0.14238	0.076934	0.077361	0.866166	1217	1	0.14238
Olfr310	2	0.90077	0.90061	0.994154	14561	0	0.16762	0.076934	0.077361	0.866166	1252	1	0.16762
Il5ra	2	0.90587	0.90568	0.994154	14638	0	0.21367	0.076934	0.077361	0.866166	1205	1	0.21367
Adam7	2	0.91999	0.91984	0.994154	14831	0	0.32633	0.076934	0.077361	0.866166	1226	1	0.32633
4933421I07Rik	2	0.95642	0.95651	0.994154	15278	0	0.22638	0.076934	0.077361	0.866166	1195	1	0.22638
Usp28	2	0.95642	0.95651	0.994154	15297	0	0.22638	0.076934	0.077361	0.866166	1225	1	0.22638
Eif3k	2	0.95642	0.95651	0.994154	15364	0	0.22638	0.076934	0.077361	0.866166	1261	1	0.22638
mmu-mir-7091	2	0.95642	0.95651	0.994154	15382	0	0.22638	0.076934	0.077361	0.866166	1219	1	0.22638
mmu-mir-7090	2	0.95642	0.95651	0.994154	15387	0	0.22638	0.076934	0.077361	0.866166	1267	1	0.22638
Ubfd1	2	0.95642	0.95651	0.994154	15419	0	0.22638	0.076934	0.077361	0.866166	1243	1	0.22638
Naa40	2	0.95642	0.95651	0.994154	15434	0	0.22638	0.076934	0.077361	0.866166	1214	1	0.22638
Zfp275	2	0.95642	0.95651	0.994154	15457	0	0.22638	0.076934	0.077361	0.866166	1263	1	0.22638
3110043O21Rik	2	0.95642	0.95651	0.994154	15470	0	0.22638	0.076934	0.077361	0.866166	1266	1	0.22638
mmu-mir-497	2	0.95642	0.95651	0.994154	15517	0	0.22638	0.076934	0.077361	0.866166	1244	1	0.22638
Agl	2	0.95642	0.95651	0.994154	15521	0	0.22638	0.076934	0.077361	0.866166	1233	1	0.22638
BC089491	2	0.98145	0.9815	0.998995	15822	0	0.41312	0.076934	0.077361	0.866166	1210	1	0.41312
Abi3	2	0.98629	0.98637	0.998995	15903	0	0.52494	0.076934	0.077361	0.866166	1192	1	0.52494
Olfr930	2	0.99123	0.9912	0.99913	16010	0	0.58984	0.076934	0.077361	0.866166	1218	1	0.58984
Cry1	2	0.99356	0.99357	0.999196	16035	0	0.74496	0.076934	0.077361	0.866166	1215	1	0.74496
Pkd1l3	2	0.99376	0.99375	0.999196	16039	0	0.82586	0.076934	0.077361	0.866166	1213	1	0.82586
Vmn1r89	2	0.99387	0.99387	0.999196	16043	0	0.80485	0.076934	0.077361	0.866166	1222	1	0.80485
Lrrc57	2	0.99406	0.99405	0.999196	16046	0	0.80357	0.076934	0.077361	0.866166	1229	1	0.80357
Slc35f4	3	0.83947	0.84215	0.97445	13920	1	-0.99	0.076936	0.080612	0.866166	1268	1	-0.99
Slc22a26	1	0.9227	0.9232	0.994154	14865	0	0.5531	0.077302	0.077287	0.866166	1269	0	0.5531
Retsat	1	0.92233	0.92285	0.994154	14862	0	0.57171	0.077666	0.077674	0.866166	1270	0	0.57171
Mug2	1	0.92233	0.92285	0.994154	14863	0	0.57171	0.077666	0.077674	0.866166	1272	0	0.57171
Mroh1	1	0.92233	0.92285	0.994154	14864	0	0.57171	0.077666	0.077674	0.866166	1271	0	0.57171
Dcp1a	1	0.92217	0.92269	0.994154	14859	0	0.54786	0.077827	0.077844	0.866166	1273	0	0.54786
Cypt10	1	0.92203	0.92255	0.994154	14857	0	0.72249	0.077968	0.07798	0.866166	1274	0	0.72249
Gpr17	1	0.92179	0.9223	0.994154	14856	0	0.68256	0.078211	0.078227	0.866166	1275	0	0.68256
Gm3336	1	0.92159	0.92209	0.994154	14854	0	0.66154	0.078413	0.078438	0.866166	1276	0	0.66154
Cdca2	1	0.92155	0.92205	0.994154	14852	0	0.5274	0.078453	0.078479	0.866166	1277	0	0.5274
Kifc5b	1	0.92151	0.92201	0.994154	14850	0	0.57259	0.078494	0.078512	0.866166	1278	0	0.57259
Fli1	1	0.92141	0.9219	0.994154	14849	0	0.49922	0.078595	0.078611	0.866166	1279	0	0.49922
Ccdc8	1	0.92082	0.92133	0.994154	14844	0	0.54142	0.07918	0.079205	0.866166	1280	0	0.54142
Dhfr	1	0.9206	0.92112	0.994154	14838	0	0.45111	0.079402	0.079444	0.866166	1283	0	0.45111
Itk	1	0.9206	0.92112	0.994154	14839	0	0.45111	0.079402	0.079444	0.866166	1286	0	0.45111
Ccdc40	1	0.9206	0.92112	0.994154	14840	0	0.45111	0.079402	0.079444	0.866166	1284	0	0.45111
Atp6ap2	1	0.9206	0.92112	0.994154	14841	0	0.45111	0.079402	0.079444	0.866166	1285	0	0.45111
Slc22a13	1	0.9206	0.92112	0.994154	14842	0	0.45111	0.079402	0.079444	0.866166	1281	0	0.45111
Medag	1	0.9206	0.92112	0.994154	14843	0	0.45111	0.079402	0.079444	0.866166	1282	0	0.45111
Cpsf4l	1	0.92021	0.92074	0.994154	14836	0	0.4641	0.079786	0.079809	0.866166	1287	0	0.4641
Cfhr2	1	0.92009	0.92062	0.994154	14833	0	0.46028	0.079907	0.079947	0.866166	1288	0	0.46028
Slco1a1	1	0.91993	0.92046	0.994154	14829	0	0.45584	0.080069	0.080095	0.866166	1289	0	0.45584
Mrp63	1	0.91993	0.92046	0.994154	14830	0	0.45584	0.080069	0.080095	0.866166	1290	0	0.45584
Wdr36	1	0.919	0.91958	0.994154	14812	0	0.35013	0.080998	0.080987	0.866166	1294	0	0.35013
mmu-mir-490	1	0.919	0.91958	0.994154	14813	0	0.35013	0.080998	0.080987	0.866166	1292	0	0.35013
Gpc5	1	0.919	0.91958	0.994154	14814	0	0.35013	0.080998	0.080987	0.866166	1295	0	0.35013
Tacc2	1	0.919	0.91958	0.994154	14815	0	0.35013	0.080998	0.080987	0.866166	1296	0	0.35013
Tmem14a	1	0.919	0.91958	0.994154	14816	0	0.35013	0.080998	0.080987	0.866166	1293	0	0.35013
Aggf1	1	0.919	0.91958	0.994154	14817	0	0.35013	0.080998	0.080987	0.866166	1297	0	0.35013
Klk1b8	1	0.919	0.91958	0.994154	14818	0	0.35013	0.080998	0.080987	0.866166	1291	0	0.35013
Vstm2b	1	0.919	0.91958	0.994154	14819	0	0.35013	0.080998	0.080987	0.866166	1299	0	0.35013
Serpinb13	1	0.919	0.91958	0.994154	14820	0	0.35013	0.080998	0.080987	0.866166	1298	0	0.35013
Olfr788	1	0.9184	0.91895	0.994154	14809	0	0.51583	0.081603	0.081594	0.866166	1300	0	0.51583
Gpr128	1	0.91836	0.91892	0.994154	14808	0	0.52565	0.081644	0.08164	0.866166	1301	0	0.52565
Slc6a7	1	0.91817	0.91873	0.994154	14806	0	0.4044	0.081826	0.081815	0.866166	1302	0	0.4044
Map3k7	1	0.91811	0.91868	0.994154	14805	0	0.53221	0.081886	0.081877	0.866166	1303	0	0.53221
Fcer1g	1	0.91787	0.91845	0.994154	14801	0	0.40043	0.082128	0.082129	0.866166	1305	0	0.40043
Kif1b	1	0.91787	0.91845	0.994154	14802	0	0.40043	0.082128	0.082129	0.866166	1306	0	0.40043
Reln	1	0.91787	0.91845	0.994154	14803	0	0.40043	0.082128	0.082129	0.866166	1307	0	0.40043
Fam188a	1	0.91787	0.91845	0.994154	14804	0	0.40043	0.082128	0.082129	0.866166	1304	0	0.40043
Zfp180	1	0.91731	0.91789	0.994154	14797	0	0.47592	0.082694	0.082651	0.866166	1308	0	0.47592
Mep1a	1	0.91706	0.91764	0.994154	14795	0	0.46597	0.082936	0.082902	0.866166	1309	0	0.46597
Etf1	1	0.91698	0.91755	0.994154	14793	0	0.49954	0.083017	0.082984	0.866166	1310	0	0.49954
Cebpz	1	0.91684	0.91738	0.994154	14792	0	0.39026	0.083158	0.083112	0.866166	1311	0	0.39026
Fgf7	1	0.9167	0.91723	0.994154	14791	0	0.36118	0.0833	0.083258	0.866166	1312	0	0.36118
Gm12429	1	0.91662	0.91715	0.994154	14790	0	0.48178	0.08338	0.083337	0.866166	1313	0	0.48178
Gm15284	1	0.91654	0.91707	0.994154	14788	0	0.46973	0.083461	0.08341	0.866166	1314	0	0.46973
Itpripl2	1	0.9165	0.91702	0.994154	14787	0	0.47546	0.083502	0.083456	0.866166	1315	0	0.47546
H2-DMb1	1	0.91642	0.91695	0.994154	14786	0	0.39854	0.083582	0.083529	0.866166	1316	0	0.39854
Tmem190	1	0.9163	0.91683	0.994154	14785	0	0.4567	0.083704	0.083659	0.866166	1317	0	0.4567
mmu-mir-1905	1	0.91626	0.91679	0.994154	14784	0	0.36485	0.083744	0.083698	0.866166	1318	0	0.36485
NonTargetingControlGuideForMouse_0180	1	0.91618	0.9167	0.994154	14782	0	0.38814	0.083825	0.083776	0.866166	1319	0	0.38814
Dnmt3l	1	0.91609	0.91662	0.994154	14781	0	0.46652	0.083905	0.08385	0.866166	1320	0	0.46652
Cxcl5	1	0.91601	0.91654	0.994154	14778	0	0.3939	0.083986	0.083924	0.866166	1321	0	0.3939
Slc19a3	1	0.91597	0.91649	0.994154	14777	0	0.4729	0.084027	0.083971	0.866166	1322	0	0.4729
AV320801	2	0.75302	0.75264	0.958804	12021	0	0.34101	0.08406	0.084272	0.866166	1323	1	0.34101
Slc7a2	2	0.18687	0.29805	0.921989	3747	1	-0.70817	0.08433	0.084542	0.866166	1324	1	-0.70817
Ttf2	2	0.77405	0.77362	0.958804	12154	0	0.12442	0.08433	0.084542	0.866166	1325	1	0.12442
Gm7168	1	0.91523	0.91576	0.994154	14770	0	0.29526	0.084774	0.084695	0.866166	1326	0	0.29526
Hoxa2	1	0.91523	0.91576	0.994154	14771	0	0.29526	0.084774	0.084695	0.866166	1328	0	0.29526
Ccdc92	1	0.91523	0.91576	0.994154	14772	0	0.29526	0.084774	0.084695	0.866166	1327	0	0.29526
Cenpt	3	0.030817	0.077297	0.899505	716	1	-0.6125	0.085068	0.088198	0.866166	1351	1	-0.6125
Rpl30	3	0.1004	0.22161	0.921989	2305	2	-1.3099	0.085068	0.088198	0.866166	1346	1	-1.3099
Psmg4	3	0.1789	0.32542	0.921989	3604	2	-1.3099	0.085068	0.088198	0.866166	1329	1	-1.3099
Brwd3	3	0.18088	0.32765	0.921989	3634	2	-1.2001	0.085068	0.088198	0.866166	1332	1	-1.2001
Dlgap3	3	0.26677	0.41845	0.921989	5020	1	-0.90485	0.085068	0.088198	0.866166	1343	1	-0.90485
Uap1l1	3	0.36581	0.52073	0.924505	6775	2	-1.6166	0.085068	0.088198	0.866166	1333	1	-1.6166
Zfp516	3	0.43495	0.59028	0.924505	7377	2	-1.3099	0.085068	0.088198	0.866166	1348	1	-1.3099
Ccdc146	3	0.43495	0.59028	0.924505	7407	2	-1.3099	0.085068	0.088198	0.866166	1345	1	-1.3099
Klhl28	3	0.43495	0.59028	0.924505	7418	2	-1.3099	0.085068	0.088198	0.866166	1336	1	-1.3099
mmu-mir-1191	3	0.4482	0.60344	0.927012	7441	1	-0.57831	0.085068	0.088198	0.866166	1349	1	-0.57831
Arhgap5	3	0.50168	0.65562	0.958804	8652	1	-0.81676	0.085068	0.088198	0.866166	1347	1	-0.81676
Magea1	3	0.50168	0.65562	0.958804	8657	1	-0.57831	0.085068	0.088198	0.866166	1337	1	-0.57831
Sacm1l	3	0.50168	0.65562	0.958804	8672	1	-0.99	0.085068	0.088198	0.866166	1330	1	-0.99
mmu-mir-6384	3	0.61306	0.7037	0.958804	10616	1	-0.57831	0.085068	0.088198	0.866166	1350	1	-0.57831
Acads	3	0.61306	0.7037	0.958804	10629	1	-0.5741	0.085068	0.088198	0.866166	1335	1	-0.5741
Trim43b	3	0.61306	0.7037	0.958804	10632	1	-1.4054	0.085068	0.088198	0.866166	1338	1	-1.4054
Col10a1	3	0.61306	0.7037	0.958804	10643	1	-0.22265	0.085068	0.088198	0.866166	1342	1	-0.22265
Gabrb3	3	0.61306	0.7037	0.958804	10659	1	0.44108	0.085068	0.088198	0.866166	1339	1	0.44108
Gabrr1	3	0.83947	0.84215	0.97445	13867	1	-0.22156	0.085068	0.088198	0.866166	1334	1	-0.22156
Sprr2f	3	0.93335	0.93355	0.994154	14992	0	-0.99	0.085068	0.088198	0.866166	1331	1	-0.99
Smad1	3	0.96169	0.96192	0.995089	15600	0	-0.57831	0.085068	0.088198	0.866166	1341	1	-0.57831
Cfl2	3	0.96249	0.96272	0.995787	15602	0	-0.57831	0.085068	0.088198	0.866166	1344	1	-0.57831
Slc33a1	3	0.97876	0.97888	0.998995	15795	0	-0.35402	0.085068	0.088198	0.866166	1340	1	-0.35402
Upk3bl	1	0.91468	0.91522	0.994154	14767	0	0.44052	0.085319	0.085239	0.866166	1352	0	0.44052
Rmnd5a	1	0.9146	0.91513	0.994154	14766	0	0.37609	0.0854	0.085326	0.866166	1353	0	0.37609
Akap2	1	0.91452	0.91505	0.994154	14764	0	0.41976	0.085481	0.085416	0.866166	1354	0	0.41976
Clic3	1	0.91434	0.91487	0.994154	14762	0	0.37701	0.085662	0.085581	0.866166	1355	0	0.37701
4930469G21Rik	2	0.0068139	0.012992	0.899505	157	1	-1.6558	0.08576	0.085923	0.866166	1358	1	-1.6558
Egf	2	0.23399	0.3626	0.921989	4703	1	-0.63951	0.08576	0.085923	0.866166	1356	1	-0.63951
Xpot	2	0.37145	0.45682	0.921989	6793	1	-0.47905	0.08576	0.085923	0.866166	1364	1	-0.47905
Tomm34	2	0.41927	0.4877	0.924505	7306	1	-0.68121	0.08576	0.085923	0.866166	1357	1	-0.68121
Nnat	2	0.469	0.52137	0.924505	8332	1	-0.38309	0.08576	0.085923	0.866166	1362	1	-0.38309
mmu-mir-126a	2	0.51082	0.55047	0.924505	8776	1	-0.085537	0.08576	0.085923	0.866166	1359	1	-0.085537
Gm10778	2	0.70463	0.70607	0.958804	11293	1	-0.14153	0.08576	0.085923	0.866166	1363	1	-0.14153
Asz1	2	0.88772	0.8876	0.994154	14326	0	0.11895	0.08576	0.085923	0.866166	1360	1	0.11895
Klhl33	2	0.95642	0.95651	0.994154	15484	0	0.22428	0.08576	0.085923	0.866166	1361	1	0.22428
Clec4a4	1	0.9142	0.91473	0.994154	14761	0	0.41513	0.085804	0.08572	0.866166	1365	0	0.41513
Il10ra	1	0.91412	0.91464	0.994154	14759	0	0.38689	0.085884	0.085797	0.866166	1366	0	0.38689
Chp2	1	0.91403	0.91455	0.994154	14758	0	0.43486	0.085965	0.085876	0.866166	1367	0	0.43486
Gps2	1	0.91395	0.91446	0.994154	14757	0	0.39829	0.086046	0.085968	0.866166	1368	0	0.39829
Bsg	1	0.91371	0.91423	0.994154	14755	0	0.3718	0.086288	0.086221	0.866166	1369	0	0.3718
NonTargetingControlGuideForMouse_0118	1	0.91363	0.91414	0.994154	14754	0	0.32662	0.086369	0.086306	0.866166	1370	0	0.32662
Map4k3	1	0.91359	0.91409	0.994154	14753	0	0.30429	0.08641	0.086339	0.866166	1371	0	0.30429
Mycl	1	0.91351	0.91402	0.994154	14751	0	0.30375	0.08649	0.086416	0.866166	1372	0	0.30375
Ccdc85a	1	0.91347	0.91398	0.994154	14750	0	0.33413	0.086531	0.086454	0.866166	1373	0	0.33413
Il1f9	1	0.91343	0.91394	0.994154	14748	0	0.36266	0.086571	0.086496	0.866166	1374	0	0.36266
Tnfrsf26	1	0.91331	0.91382	0.994154	14747	0	0.34705	0.086692	0.086618	0.866166	1375	0	0.34705
Vmn2r29	4	0.19194	0.37324	0.921989	3809	2	-1.2776	0.086766	0.095044	0.866166	1376	1	-1.2776
Gm4763	1	0.91323	0.91373	0.994154	14746	0	0.38165	0.086773	0.086695	0.866166	1377	0	0.38165
Cyp2t4	1	0.91315	0.91365	0.994154	14745	0	0.35117	0.086854	0.086772	0.866166	1378	0	0.35117
Klhl22	2	0.469	0.52137	0.924505	8468	1	-0.21444	0.087072	0.087218	0.866166	1379	1	-0.21444
Yipf4	1	0.91286	0.91336	0.994154	14735	0	0.25739	0.087137	0.087064	0.866166	1383	0	0.25739
Ikbip	1	0.91286	0.91336	0.994154	14736	0	0.25739	0.087137	0.087064	0.866166	1381	0	0.25739
Olfr1201	1	0.91286	0.91336	0.994154	14737	0	0.25739	0.087137	0.087064	0.866166	1380	0	0.25739
Anapc5	1	0.91286	0.91336	0.994154	14738	0	0.25739	0.087137	0.087064	0.866166	1382	0	0.25739
NonTargetingControlGuideForMouse_0880	1	0.91286	0.91336	0.994154	14739	0	0.25739	0.087137	0.087064	0.866166	1384	0	0.25739
mmu-mir-18b	1	0.91286	0.91336	0.994154	14740	0	0.25739	0.087137	0.087064	0.866166	1385	0	0.25739
Rad54l	2	0.95642	0.95651	0.994154	15424	0	0.34416	0.087227	0.087382	0.866166	1386	1	0.34416
Prkd3	2	0.83561	0.83526	0.973802	13421	0	0.13584	0.087342	0.087499	0.866166	1387	1	0.13584
Fhl1	2	0.83561	0.83526	0.973802	13669	0	0.30545	0.087458	0.087612	0.866166	1388	1	0.30545
Ndufc1	1	0.91254	0.91301	0.994154	14727	0	0.30993	0.08746	0.087365	0.866166	1389	0	0.30993
Armc6	2	0.18687	0.29805	0.921989	3787	1	-0.50179	0.087535	0.087688	0.866166	1390	1	-0.50179
Add3	1	0.91234	0.91279	0.994154	14725	0	0.31254	0.087662	0.087572	0.866166	1391	0	0.31254
Olfr1133	1	0.9123	0.91275	0.994154	14724	0	0.29771	0.087702	0.087608	0.866166	1392	0	0.29771
Gm6121	1	0.91226	0.91271	0.994154	14723	0	0.3461	0.087742	0.08765	0.866166	1393	0	0.3461
Frk	1	0.91222	0.91267	0.994154	14722	0	0.36032	0.087783	0.087693	0.866166	1394	0	0.36032
Angpt4	1	0.9121	0.91256	0.994154	14721	0	0.33355	0.087904	0.087828	0.866166	1395	0	0.33355
Ppm1e	2	0.51423	0.55293	0.924505	8814	1	-0.27768	0.087998	0.088147	0.866166	1396	1	-0.27768
Phka1	1	0.91189	0.91235	0.994154	14717	0	0.29076	0.088106	0.088031	0.866166	1397	0	0.29076
Fbxo8	1	0.91181	0.91227	0.994154	14716	0	0.29046	0.088187	0.088104	0.866166	1398	0	0.29046
Pde6b	1	0.91163	0.91209	0.994154	14713	0	0.22967	0.088368	0.088283	0.866166	1399	0	0.22967
Tecr	2	0.469	0.52137	0.924505	8483	1	-0.27981	0.088461	0.088625	0.866166	1401	1	-0.27981
Nap1l2	2	0.98337	0.9834	0.998995	15881	0	0.56827	0.088461	0.088625	0.866166	1400	1	0.56827
Tcf24	1	0.91145	0.91191	0.994154	14711	0	0.33575	0.08855	0.088482	0.866166	1402	0	0.33575
Rap1gap	1	0.91141	0.91186	0.994154	14710	0	0.22476	0.08859	0.088525	0.866166	1403	0	0.22476
5430419D17Rik	2	0.37145	0.45682	0.921989	6973	1	-0.31997	0.088615	0.088776	0.866166	1404	1	-0.31997
Als2cr11	2	0.29371	0.40931	0.921989	5821	1	-0.47125	0.088731	0.088897	0.866166	1406	1	-0.47125
Gps1	2	0.78826	0.78781	0.958804	12250	0	0.072781	0.088731	0.088897	0.866166	1405	1	0.072781
Cage1	1	0.91121	0.91164	0.994154	14708	0	0.3189	0.088792	0.088719	0.866166	1407	0	0.3189
Htr3b	1	0.91105	0.91148	0.994154	14707	0	0.27112	0.088954	0.088891	0.866166	1408	0	0.27112
Fam228a	1	0.91097	0.91141	0.994154	14706	0	0.27178	0.089035	0.088976	0.866166	1409	0	0.27178
Ttyh3	2	0.15097	0.24658	0.921989	3062	1	-0.70691	0.089078	0.089213	0.866166	1413	1	-0.70691
Ms4a18	2	0.469	0.52137	0.924505	8601	1	-0.31931	0.089078	0.089213	0.866166	1410	1	-0.31931
Kcnk2	2	0.9801	0.98015	0.998995	15807	0	0.4779	0.089078	0.089213	0.866166	1412	1	0.4779
Cmip	2	0.98332	0.98336	0.998995	15880	0	0.54393	0.089078	0.089213	0.866166	1411	1	0.54393
Dgcr2	1	0.91088	0.91132	0.994154	14705	0	0.28976	0.089116	0.089055	0.866166	1414	0	0.28976
mmu-mir-5098	1	0.9106	0.91105	0.994154	14700	0	0.2085	0.089398	0.089345	0.866166	1417	0	0.2085
Mroh7	1	0.9106	0.91105	0.994154	14701	0	0.2085	0.089398	0.089345	0.866166	1418	0	0.2085
Gata3	1	0.9106	0.91105	0.994154	14702	0	0.2085	0.089398	0.089345	0.866166	1416	0	0.2085
Gm5820	1	0.9106	0.91105	0.994154	14703	0	0.2085	0.089398	0.089345	0.866166	1415	0	0.2085
Mylpf	2	0.469	0.52137	0.924505	8564	1	-0.38017	0.08981	0.089965	0.866166	1419	1	-0.38017
AF067061	2	0.469	0.52137	0.924505	8625	1	-0.38017	0.08981	0.089965	0.866166	1421	1	-0.38017
Zcchc17	2	0.52283	0.55919	0.924505	8929	1	-0.45803	0.08981	0.089965	0.866166	1420	1	-0.45803
Prelp	2	0.95642	0.95651	0.994154	15519	0	0.22721	0.08981	0.089965	0.866166	1422	1	0.22721
Cngb3	1	0.91008	0.91053	0.994154	14697	0	0.25704	0.089923	0.089866	0.866166	1423	0	0.25704
Itm2c	1	0.90979	0.91027	0.994154	14693	0	0.25506	0.090206	0.090156	0.866166	1424	0	0.25506
Zfp735	2	0.95642	0.95651	0.994154	15311	0	0.22516	0.090311	0.090479	0.866166	1425	1	0.22516
Slc11a2	2	0.32234	0.4263	0.921989	6026	1	-0.50492	0.090465	0.090631	0.866166	1426	1	-0.50492
Impdh2	1	0.90951	0.90999	0.994154	14691	0	0.18657	0.090489	0.09046	0.866166	1427	0	0.18657
Usp13	1	0.90943	0.9099	0.994154	14690	0	0.24775	0.090569	0.090528	0.866166	1428	0	0.24775
Wrap73	1	0.90931	0.90979	0.994154	14689	0	0.2216	0.090691	0.090639	0.866166	1429	0	0.2216
Hist1h2ah	2	0.62746	0.63939	0.958804	10684	1	-0.21155	0.090696	0.090868	0.866166	1431	1	-0.21155
Sh2b2	2	0.88249	0.88232	0.994154	14248	0	0.065691	0.090696	0.090868	0.866166	1430	1	0.065691
Cyth2	1	0.90927	0.90975	0.994154	14688	0	0.2048	0.090731	0.090681	0.866166	1432	0	0.2048
Hadhb	1	0.90915	0.90964	0.994154	14686	0	0.25547	0.090852	0.090823	0.866166	1433	0	0.25547
Pias1	2	0.37145	0.45682	0.921989	6867	1	-0.35713	0.091081	0.091243	0.866166	1434	1	-0.35713
Psma1	1	0.90887	0.90935	0.994154	14684	0	0.1783	0.091135	0.091112	0.866166	1435	0	0.1783
Tlr8	1	0.90887	0.90935	0.994154	14685	0	0.1783	0.091135	0.091112	0.866166	1436	0	0.1783
Zfp819	1	0.90862	0.90911	0.994154	14681	0	0.20911	0.091377	0.09135	0.866166	1437	0	0.20911
Bach1	1	0.9085	0.90899	0.994154	14680	0	0.16946	0.091498	0.091465	0.866166	1438	0	0.16946
Arrdc1	1	0.90834	0.90882	0.994154	14677	0	0.16715	0.09166	0.091631	0.866166	1439	0	0.16715
Rps4x	1	0.90834	0.90882	0.994154	14678	0	0.16715	0.09166	0.091631	0.866166	1440	0	0.16715
Hnrnpu	2	0.12314	0.20528	0.901639	2418	1	-0.82363	0.091736	0.091868	0.866166	1442	1	-0.82363
Tnn	2	0.29371	0.40931	0.921989	5792	1	-0.55906	0.091736	0.091868	0.866166	1444	1	-0.55906
Jmjd8	2	0.70463	0.70607	0.958804	11641	1	-0.13685	0.091736	0.091868	0.866166	1441	1	-0.13685
Cyp2c50	2	0.83561	0.83526	0.973802	13409	0	0.023114	0.091736	0.091868	0.866166	1446	1	0.023114
Gramd4	2	0.83561	0.83526	0.973802	13811	0	0.023114	0.091736	0.091868	0.866166	1445	1	0.023114
Olfr891	2	0.99512	0.99505	0.999196	16067	0	0.73866	0.091736	0.091868	0.866166	1443	1	0.73866
NonTargetingControlGuideForMouse_0295	1	0.90822	0.90869	0.994154	14674	0	0.20608	0.091781	0.091747	0.866166	1447	0	0.20608
Cyp2b10	1	0.90818	0.90865	0.994154	14673	0	0.18659	0.091821	0.09178	0.866166	1448	0	0.18659
Olfr834	1	0.90814	0.90861	0.994154	14672	0	0.16286	0.091862	0.091825	0.866166	1449	0	0.16286
Glipr1l1	1	0.90798	0.90845	0.994154	14671	0	0.2056	0.092023	0.091985	0.866166	1450	0	0.2056
mmu-mir-449b	1	0.90792	0.90838	0.994154	14669	0	0.15779	0.092084	0.092044	0.866166	1451	0	0.15779
Hyal4	1	0.90786	0.90834	0.994154	14668	0	0.17959	0.092145	0.092103	0.866166	1452	0	0.17959
Sbno1	1	0.90777	0.90826	0.994154	14667	0	0.19938	0.092225	0.092179	0.866166	1453	0	0.19938
Golga5	2	0.99268	0.99269	0.999196	16016	0	0.72952	0.092313	0.092427	0.866166	1454	1	0.72952
Mmrn1	1	0.90753	0.90803	0.994154	14663	0	0.16953	0.092468	0.092429	0.866166	1455	0	0.16953
Gm2696	1	0.90749	0.90799	0.994154	14662	0	0.14981	0.092508	0.092461	0.866166	1456	0	0.14981
Svs6	2	0.58004	0.6017	0.924505	9289	1	-0.22548	0.092544	0.092664	0.866166	1457	1	-0.22548
Tnxb	1	0.90741	0.90791	0.994154	14661	0	0.17431	0.092589	0.092524	0.866166	1458	0	0.17431
Olfr1480	2	0.88227	0.8821	0.994154	14245	0	0.013408	0.092621	0.092734	0.866166	1459	1	0.013408
Etaa1	1	0.90733	0.90783	0.994154	14660	0	0.17517	0.09267	0.092609	0.866166	1460	0	0.17517
Dld	2	0.18687	0.29805	0.921989	3712	1	-0.6236	0.092698	0.092818	0.866166	1461	1	-0.6236
Wdr26	1	0.90717	0.90767	0.994154	14658	0	0.16159	0.092831	0.09277	0.866166	1462	0	0.16159
Dync1i1	1	0.90705	0.90756	0.994154	14657	0	0.16572	0.092952	0.092893	0.866166	1463	0	0.16572
Myo1d	2	0.58004	0.6017	0.924505	9170	1	-0.26652	0.092967	0.093078	0.866166	1464	1	-0.26652
Ubald2	1	0.90697	0.90747	0.994154	14656	0	0.17345	0.093033	0.092978	0.866166	1465	0	0.17345
Strada	1	0.90693	0.90743	0.994154	14655	0	0.16311	0.093074	0.093016	0.866166	1466	0	0.16311
Dctd	1	0.90676	0.90728	0.994154	14651	0	0.15022	0.093235	0.093168	0.866166	1467	0	0.15022
Atm	2	0.99512	0.99505	0.999196	16071	0	0.90487	0.093236	0.093352	0.866166	1468	1	0.90487
Tcof1	2	0.91864	0.9185	0.994154	14811	0	0.34536	0.093313	0.093426	0.866166	1469	1	0.34536
Cox7b	3	0.28443	0.43692	0.921989	5583	2	-1.5716	0.093322	0.095732	0.866166	1470	1	-1.5716
Tmem63c	3	0.97791	0.97806	0.998995	15793	0	-0.37061	0.093322	0.095732	0.866166	1471	1	-0.37061
Mkrn3	1	0.90632	0.90682	0.994154	14649	0	0.14997	0.093679	0.093617	0.866166	1472	0	0.14997
Sall4	2	0.70463	0.70607	0.958804	11637	1	-0.10096	0.093698	0.09381	0.866166	1473	1	-0.10096
Csnk1d	1	0.90616	0.90666	0.994154	14644	0	0.13873	0.093841	0.093772	0.866166	1474	0	0.13873
Gm11563	1	0.90612	0.90663	0.994154	14643	0	0.12252	0.093881	0.093813	0.866166	1475	0	0.12252
Fam47e	1	0.90608	0.90659	0.994154	14642	0	0.12723	0.093922	0.093858	0.866166	1476	0	0.12723
Xpo6	1	0.90604	0.90655	0.994154	14641	0	0.13359	0.093962	0.093901	0.866166	1477	0	0.13359
Olfr640	1	0.906	0.90651	0.994154	14640	0	0.13513	0.094002	0.093947	0.866166	1478	0	0.13513
Abtb1	1	0.90592	0.90643	0.994154	14639	0	0.1391	0.094083	0.094025	0.866166	1479	0	0.1391
Arel1	1	0.90576	0.90626	0.994154	14637	0	0.13192	0.094245	0.094203	0.866166	1480	0	0.13192
Ssbp2	1	0.90559	0.90611	0.994154	14635	0	0.12494	0.094406	0.094374	0.866166	1481	0	0.12494
Vmn1r178	1	0.90555	0.90607	0.994154	14634	0	0.11219	0.094447	0.094412	0.866166	1482	0	0.11219
0610030E20Rik	1	0.90551	0.90603	0.994154	14633	0	0.1157	0.094487	0.094451	0.866166	1483	0	0.1157
Tmem170b	1	0.90539	0.90591	0.994154	14632	0	0.1122	0.094608	0.09457	0.866166	1484	0	0.1122
Cystm1	1	0.90531	0.90584	0.994154	14630	0	0.11998	0.094689	0.094646	0.866166	1485	0	0.11998
Tpx2	1	0.90527	0.9058	0.994154	14629	0	0.10951	0.094729	0.094685	0.866166	1486	0	0.10951
Hdx	4	0.19194	0.37324	0.921989	3810	2	-1.4875	0.094739	0.10207	0.866166	1487	1	-1.4875
Apoc3	1	0.90523	0.90576	0.994154	14628	0	0.10989	0.09477	0.094732	0.866166	1488	0	0.10989
Otop3	1	0.90499	0.9055	0.994154	14625	0	0.11087	0.095012	0.094962	0.866166	1489	0	0.11087
Usp47	1	0.90491	0.90542	0.994154	14624	0	0.1084	0.095093	0.095051	0.866166	1490	0	0.1084
Olfr1138	3	0.26677	0.41845	0.921989	4989	1	-0.15573	0.095477	0.097715	0.866166	1492	1	-0.15573
S100a7a	3	0.28443	0.43692	0.921989	5593	2	-1.5716	0.095477	0.097715	0.866166	1491	1	-1.5716
Tpcn2	3	0.55159	0.67622	0.958804	9139	1	-0.3798	0.095477	0.097715	0.866166	1493	1	-0.3798
Aspg	1	0.9045	0.90497	0.994154	14621	0	0.087033	0.095497	0.095443	0.866166	1494	0	0.087033
Aspa	1	0.90442	0.90489	0.994154	14618	0	0.089191	0.095578	0.095523	0.866166	1495	0	0.089191
Tmc1	1	0.9043	0.90477	0.994154	14617	0	0.082488	0.095699	0.095644	0.866166	1496	0	0.082488
Ptchd4	1	0.90426	0.90473	0.994154	14616	0	0.08529	0.095739	0.095685	0.866166	1497	0	0.08529
Ube3a	1	0.9039	0.90438	0.994154	14609	0	0.073153	0.096103	0.096039	0.866166	1498	0	0.073153
Caps2	1	0.90386	0.90434	0.994154	14608	0	0.085434	0.096143	0.096086	0.866166	1499	0	0.085434
Kcnj16	1	0.90378	0.90427	0.994154	14606	0	0.079961	0.096224	0.096154	0.866166	1500	0	0.079961
Guca2b	1	0.90374	0.90423	0.994154	14605	0	0.076797	0.096264	0.0962	0.866166	1501	0	0.076797
Ica1l	1	0.9037	0.9042	0.994154	14603	0	0.077486	0.096305	0.09625	0.866166	1502	0	0.077486
Dpf3	4	0.50352	0.6722	0.958804	8701	2	-0.6806	0.096312	0.10347	0.866166	1503	1	-0.6806
Map3k11	1	0.90357	0.90406	0.994154	14601	0	0.067694	0.096426	0.096376	0.866166	1504	0	0.067694
Gen1	1	0.90317	0.90368	0.994154	14598	0	0.064663	0.09683	0.096769	0.866166	1505	0	0.064663
Olfr76	1	0.90309	0.9036	0.994154	14597	0	0.067209	0.09691	0.096852	0.866166	1506	0	0.067209
Arl1	3	0.93335	0.93355	0.994154	15005	0	-0.57831	0.096949	0.09908	0.866166	1507	1	-0.57831
Lasp1	1	0.90305	0.90356	0.994154	14596	0	0.060315	0.096951	0.096886	0.866166	1508	0	0.060315
Nlrp4a	1	0.90285	0.90335	0.994154	14593	0	0.056257	0.097153	0.097086	0.866166	1509	0	0.056257
Sbk1	3	0.43495	0.59028	0.924505	7400	2	-1.3099	0.097289	0.099407	0.866166	1510	1	-1.3099
Trmt112	1	0.90265	0.90316	0.994154	14589	0	0.047513	0.097355	0.097283	0.866166	1511	0	0.047513
Cd96	1	0.90261	0.90313	0.994154	14588	0	0.056731	0.097395	0.097326	0.866166	1512	0	0.056731
Eci1	1	0.90256	0.90309	0.994154	14586	0	0.043931	0.097435	0.097356	0.866166	1513	0	0.043931
Setdb1	1	0.90252	0.90304	0.994154	14585	0	0.055204	0.097476	0.097395	0.866166	1514	0	0.055204
Gapdh	1	0.90248	0.90301	0.994154	14584	0	0.058566	0.097516	0.097439	0.866166	1515	0	0.058566
Prorsd1	1	0.9024	0.90294	0.994154	14583	0	0.058204	0.097597	0.097511	0.866166	1516	0	0.058204
Tslp	1	0.90236	0.90289	0.994154	14582	0	0.055925	0.097637	0.097546	0.866166	1517	0	0.055925
Olfr535	1	0.90212	0.90263	0.994154	14580	0	0.044385	0.09788	0.097795	0.866166	1518	0	0.044385
Cnbd2	1	0.90208	0.9026	0.994154	14579	0	0.053039	0.09792	0.097833	0.866166	1519	0	0.053039
Ddit4l	1	0.9018	0.90231	0.994154	14575	0	0.041927	0.098203	0.098122	0.866166	1520	0	0.041927
Nox3	1	0.9018	0.90231	0.994154	14576	0	0.041927	0.098203	0.098122	0.866166	1522	0	0.041927
Olfr1313	1	0.9018	0.90231	0.994154	14577	0	0.041927	0.098203	0.098122	0.866166	1521	0	0.041927
Slc35c2	1	0.90168	0.90221	0.994154	14573	0	0.055909	0.098324	0.098239	0.866166	1523	0	0.055909
Gpm6b	1	0.90158	0.90211	0.994154	14571	0	0.041166	0.098425	0.098341	0.866166	1525	0	0.041166
Emc10	1	0.90158	0.90211	0.994154	14572	0	0.041166	0.098425	0.098341	0.866166	1524	0	0.041166
Ccdc137	1	0.90135	0.90191	0.994154	14568	0	0.040254	0.098647	0.098583	0.866166	1526	0	0.040254
Baiap3	1	0.90083	0.90137	0.994154	14563	0	0.037745	0.099172	0.099132	0.866166	1529	0	0.037745
Mycbp2	1	0.90083	0.90137	0.994154	14564	0	0.037745	0.099172	0.099132	0.866166	1528	0	0.037745
Fgf9	1	0.90083	0.90137	0.994154	14565	0	0.037745	0.099172	0.099132	0.866166	1527	0	0.037745
Tbccd1	1	0.90083	0.90137	0.994154	14566	0	0.037745	0.099172	0.099132	0.866166	1530	0	0.037745
Lrig1	3	0.97652	0.9767	0.998995	15755	0	-0.43234	0.099437	0.10144	0.866166	1531	1	-0.43234
Olfr654	1	0.90014	0.90071	0.994154	14550	0	0.035952	0.099859	0.099844	0.866166	1536	0	0.035952
Olfr876	1	0.90014	0.90071	0.994154	14551	0	0.035952	0.099859	0.099844	0.866166	1535	0	0.035952
Ttk	1	0.90014	0.90071	0.994154	14552	0	0.035952	0.099859	0.099844	0.866166	1532	0	0.035952
Pigr	1	0.90014	0.90071	0.994154	14553	0	0.035952	0.099859	0.099844	0.866166	1538	0	0.035952
Spata20	1	0.90014	0.90071	0.994154	14554	0	0.035952	0.099859	0.099844	0.866166	1539	0	0.035952
Pcdhga4	1	0.90014	0.90071	0.994154	14555	0	0.035952	0.099859	0.099844	0.866166	1537	0	0.035952
Hbegf	1	0.90014	0.90071	0.994154	14556	0	0.035952	0.099859	0.099844	0.866166	1533	0	0.035952
Mrps24	1	0.90014	0.90071	0.994154	14557	0	0.035952	0.099859	0.099844	0.866166	1534	0	0.035952
9830107B12Rik	3	0.40643	0.56183	0.924505	7185	1	-1.0111	0.10017	0.10213	0.866166	1540	1	-1.0111
Mrgpra3	3	0.61306	0.7037	0.958804	10607	1	-0.99	0.10079	0.10272	0.866166	1541	1	-0.99
Cxxc1	3	0.43495	0.59028	0.924505	7344	2	-1.3099	0.10091	0.10282	0.866166	1542	1	-1.3099
Fkbp4	1	0.89909	0.89966	0.994154	14531	0	0.033561	0.10091	0.10088	0.866166	1547	0	0.033561
Ifna11	1	0.89909	0.89966	0.994154	14532	0	0.033561	0.10091	0.10088	0.866166	1554	0	0.033561
Mynn	1	0.89909	0.89966	0.994154	14533	0	0.033561	0.10091	0.10088	0.866166	1546	0	0.033561
Mpp6	1	0.89909	0.89966	0.994154	14534	0	0.033561	0.10091	0.10088	0.866166	1548	0	0.033561
Arnt	1	0.89909	0.89966	0.994154	14535	0	0.033561	0.10091	0.10088	0.866166	1550	0	0.033561
Slc37a2	1	0.89909	0.89966	0.994154	14536	0	0.033561	0.10091	0.10088	0.866166	1553	0	0.033561
Wdr64	1	0.89909	0.89966	0.994154	14537	0	0.033561	0.10091	0.10088	0.866166	1551	0	0.033561
Pyy	1	0.89909	0.89966	0.994154	14538	0	0.033561	0.10091	0.10088	0.866166	1555	0	0.033561
Kcne1l	1	0.89909	0.89966	0.994154	14539	0	0.033561	0.10091	0.10088	0.866166	1552	0	0.033561
mmu-mir-6375	1	0.89909	0.89966	0.994154	14540	0	0.033561	0.10091	0.10088	0.866166	1544	0	0.033561
Hsd17b1	1	0.89909	0.89966	0.994154	14541	0	0.033561	0.10091	0.10088	0.866166	1543	0	0.033561
Dos	1	0.89909	0.89966	0.994154	14542	0	0.033561	0.10091	0.10088	0.866166	1549	0	0.033561
Myl4	1	0.89909	0.89966	0.994154	14543	0	0.033561	0.10091	0.10088	0.866166	1545	0	0.033561
Edf1	3	0.50168	0.65562	0.958804	8648	1	-0.99	0.10102	0.10294	0.866166	1556	1	-0.99
Actbl2	1	0.89832	0.89887	0.994154	14526	0	0.044717	0.10168	0.10162	0.866166	1557	0	0.044717
Gsg1	1	0.89828	0.89884	0.994154	14524	0	0.052454	0.10172	0.10165	0.866166	1558	0	0.052454
Olfr390	3	0.14552	0.28941	0.921989	3025	1	-0.57831	0.10192	0.10377	0.866166	1559	1	-0.57831
Mvb12a	3	0.43495	0.59028	0.924505	7333	2	-1.3099	0.10192	0.10377	0.866166	1560	1	-1.3099
Golga3	2	0.029107	0.053205	0.899505	663	1	-1.3376	0.10195	0.1019	0.866166	1616	1	-1.3376
Olfr669	2	0.031374	0.057174	0.899505	723	1	-1.04	0.10195	0.1019	0.866166	1624	1	-1.04
Eva1b	2	0.04969	0.08856	0.901639	1095	1	-1.193	0.10195	0.1019	0.866166	1647	1	-1.193
Pink1	2	0.058685	0.10357	0.901639	1267	1	-1.1519	0.10195	0.1019	0.866166	1637	1	-1.1519
C130060K24Rik	2	0.058685	0.10357	0.901639	1273	1	-1.1519	0.10195	0.1019	0.866166	1629	1	-1.1519
Olfr821	2	0.058685	0.10357	0.901639	1285	1	-1.1519	0.10195	0.1019	0.866166	1579	1	-1.1519
Exosc5	2	0.058685	0.10357	0.901639	1288	1	-0.85542	0.10195	0.1019	0.866166	1571	1	-0.85542
Rbbp4	2	0.068105	0.11899	0.901639	1446	1	-1.1082	0.10195	0.1019	0.866166	1638	1	-1.1082
Hmgcs2	2	0.099532	0.16922	0.901639	2262	1	-1.0121	0.10195	0.1019	0.866166	1654	1	-1.0121
Pik3c2g	2	0.10909	0.18397	0.901639	2335	1	-0.71452	0.10195	0.1019	0.866166	1564	1	-0.71452
mmu-mir-191	2	0.15097	0.24658	0.921989	3133	1	-0.90111	0.10195	0.1019	0.866166	1641	1	-0.90111
2310044G17Rik	2	0.18687	0.29805	0.921989	3727	1	-0.8385	0.10195	0.1019	0.866166	1572	1	-0.8385
Parp14	2	0.18687	0.29805	0.921989	3738	1	-0.8385	0.10195	0.1019	0.866166	1621	1	-0.8385
Actr10	2	0.18687	0.29805	0.921989	3763	1	-0.8385	0.10195	0.1019	0.866166	1646	1	-0.8385
Stxbp5	2	0.23399	0.3626	0.921989	4700	1	-0.76993	0.10195	0.1019	0.866166	1631	1	-0.76993
Fam192a	2	0.23399	0.3626	0.921989	4716	1	-0.76993	0.10195	0.1019	0.866166	1605	1	-0.76993
Mat1a	2	0.29371	0.40931	0.921989	5772	1	-0.69416	0.10195	0.1019	0.866166	1576	1	-0.69416
mmu-mir-6353	2	0.29371	0.40931	0.921989	5810	1	-0.69416	0.10195	0.1019	0.866166	1573	1	-0.69416
Gpc4	2	0.29371	0.40931	0.921989	5831	1	-0.69416	0.10195	0.1019	0.866166	1613	1	-0.69416
mmu-mir-205	2	0.29371	0.40931	0.921989	5836	1	-0.69416	0.10195	0.1019	0.866166	1644	1	-0.69416
Gm5592	2	0.33432	0.4336	0.921989	6107	1	-0.89893	0.10195	0.1019	0.866166	1588	1	-0.89893
mmu-mir-3471-1	2	0.37145	0.45682	0.921989	6791	1	-0.60947	0.10195	0.1019	0.866166	1574	1	-0.60947
Kcnmb2	2	0.37145	0.45682	0.921989	6851	1	-0.60947	0.10195	0.1019	0.866166	1595	1	-0.60947
Gm5901	2	0.37145	0.45682	0.921989	6879	1	-0.60947	0.10195	0.1019	0.866166	1584	1	-0.60947
Sh3bgr	2	0.37145	0.45682	0.921989	6960	1	-0.60947	0.10195	0.1019	0.866166	1635	1	-0.60947
Nhsl1	2	0.37145	0.45682	0.921989	6966	1	-0.60947	0.10195	0.1019	0.866166	1615	1	-0.60947
Krtap4-1	2	0.37145	0.45682	0.921989	6977	1	-0.60947	0.10195	0.1019	0.866166	1592	1	-0.60947
Fndc1	2	0.469	0.52137	0.924505	8395	1	-0.51351	0.10195	0.1019	0.866166	1597	1	-0.51351
Nipa1	2	0.469	0.52137	0.924505	8455	1	-0.51351	0.10195	0.1019	0.866166	1610	1	-0.51351
Tmem259	2	0.469	0.52137	0.924505	8456	1	-0.51351	0.10195	0.1019	0.866166	1586	1	-0.51351
Brd2	2	0.469	0.52137	0.924505	8594	1	-0.51351	0.10195	0.1019	0.866166	1593	1	-0.51351
Tyr	2	0.51448	0.55313	0.924505	8818	1	-0.7472	0.10195	0.1019	0.866166	1658	1	-0.7472
Adam18	2	0.51898	0.55637	0.924505	8871	1	-0.70847	0.10195	0.1019	0.866166	1582	1	-0.70847
Sh3bgrl3	2	0.53155	0.56552	0.924505	9046	1	-0.62383	0.10195	0.1019	0.866166	1612	1	-0.62383
Nxf3	2	0.58004	0.6017	0.924505	9221	1	-0.40279	0.10195	0.1019	0.866166	1642	1	-0.40279
Nfkbia	2	0.58004	0.6017	0.924505	9238	1	-0.40279	0.10195	0.1019	0.866166	1650	1	-0.40279
Bpifa5	2	0.58004	0.6017	0.924505	9296	1	-0.40279	0.10195	0.1019	0.866166	1630	1	-0.40279
Rbm28	2	0.58004	0.6017	0.924505	9310	1	-0.40279	0.10195	0.1019	0.866166	1607	1	-0.40279
Chac1	2	0.58004	0.6017	0.924505	9314	1	-0.40279	0.10195	0.1019	0.866166	1599	1	-0.40279
Ebf1	2	0.58004	0.6017	0.924505	9353	1	-0.40279	0.10195	0.1019	0.866166	1640	1	-0.40279
Nudt3	2	0.58004	0.6017	0.924505	9417	1	-0.40279	0.10195	0.1019	0.866166	1652	1	-0.40279
Rhcg	2	0.63135	0.64256	0.958804	10698	1	-0.57596	0.10195	0.1019	0.866166	1633	1	-0.57596
Nek3	2	0.64288	0.65208	0.958804	10742	1	-0.47977	0.10195	0.1019	0.866166	1618	1	-0.47977
Fgd3	2	0.70463	0.70607	0.958804	11289	1	-0.27195	0.10195	0.1019	0.866166	1620	1	-0.27195
Ptpn23	2	0.70463	0.70607	0.958804	11301	1	-0.27195	0.10195	0.1019	0.866166	1619	1	-0.27195
Fndc3c1	2	0.70463	0.70607	0.958804	11305	1	-0.27195	0.10195	0.1019	0.866166	1603	1	-0.27195
Olfr566	2	0.70463	0.70607	0.958804	11342	1	-0.27195	0.10195	0.1019	0.866166	1632	1	-0.27195
Il10	2	0.70463	0.70607	0.958804	11376	1	-0.27195	0.10195	0.1019	0.866166	1651	1	-0.27195
Cox7a1	2	0.70463	0.70607	0.958804	11533	1	-0.27195	0.10195	0.1019	0.866166	1627	1	-0.27195
mmu-mir-344b	2	0.70463	0.70607	0.958804	11583	1	-0.27195	0.10195	0.1019	0.866166	1606	1	-0.27195
Plekha8	2	0.70463	0.70607	0.958804	11594	1	-0.27195	0.10195	0.1019	0.866166	1567	1	-0.27195
Degs1	2	0.70463	0.70607	0.958804	11623	1	-0.27195	0.10195	0.1019	0.866166	1656	1	-0.27195
Npc1	2	0.70463	0.70607	0.958804	11625	1	-0.27195	0.10195	0.1019	0.866166	1580	1	-0.27195
Il17re	2	0.70463	0.70607	0.958804	11636	1	-0.27195	0.10195	0.1019	0.866166	1570	1	-0.27195
Creb3	2	0.75216	0.75179	0.958804	12019	0	-0.4042	0.10195	0.1019	0.866166	1600	1	-0.4042
Mlana	2	0.77112	0.77072	0.958804	12132	0	-0.28113	0.10195	0.1019	0.866166	1589	1	-0.28113
Usp12	2	0.77528	0.77488	0.958804	12164	0	-0.25487	0.10195	0.1019	0.866166	1628	1	-0.25487
Slc45a2	2	0.7803	0.77987	0.958804	12194	0	-0.18791	0.10195	0.1019	0.866166	1575	1	-0.18791
4933402J07Rik	2	0.83561	0.83526	0.973802	13440	0	-0.11199	0.10195	0.1019	0.866166	1578	1	-0.11199
Picalm	2	0.83561	0.83526	0.973802	13474	0	-0.11199	0.10195	0.1019	0.866166	1643	1	-0.11199
Il1rapl2	2	0.83561	0.83526	0.973802	13571	0	-0.11199	0.10195	0.1019	0.866166	1568	1	-0.11199
Spink14	2	0.83561	0.83526	0.973802	13580	0	-0.11199	0.10195	0.1019	0.866166	1587	1	-0.11199
Pigyl	2	0.83561	0.83526	0.973802	13625	0	-0.11199	0.10195	0.1019	0.866166	1609	1	-0.11199
Reep4	2	0.83561	0.83526	0.973802	13650	0	-0.11199	0.10195	0.1019	0.866166	1604	1	-0.11199
Ccr4	2	0.83561	0.83526	0.973802	13718	0	-0.11199	0.10195	0.1019	0.866166	1648	1	-0.11199
Vmn2r67	2	0.83561	0.83526	0.973802	13733	0	-0.11199	0.10195	0.1019	0.866166	1622	1	-0.11199
Spata5l1	2	0.83561	0.83526	0.973802	13741	0	-0.11199	0.10195	0.1019	0.866166	1625	1	-0.11199
Pgf	2	0.83561	0.83526	0.973802	13762	0	-0.11199	0.10195	0.1019	0.866166	1614	1	-0.11199
BC068281	2	0.83561	0.83526	0.973802	13784	0	-0.11199	0.10195	0.1019	0.866166	1636	1	-0.11199
Dppa3	2	0.83561	0.83526	0.973802	13795	0	-0.11199	0.10195	0.1019	0.866166	1563	1	-0.11199
Pydc4	2	0.83561	0.83526	0.973802	13820	0	-0.11199	0.10195	0.1019	0.866166	1653	1	-0.11199
March11	2	0.89705	0.89688	0.994154	14502	0	0.0065383	0.10195	0.1019	0.866166	1594	1	0.0065383
Pdlim1	2	0.90443	0.90425	0.994154	14619	0	0.075429	0.10195	0.1019	0.866166	1623	1	0.075429
Eid1	2	0.9047	0.90452	0.994154	14622	0	0.096947	0.10195	0.1019	0.866166	1645	1	0.096947
Zer1	2	0.90629	0.90611	0.994154	14645	0	0.23565	0.10195	0.1019	0.866166	1649	1	0.23565
Spata16	2	0.90686	0.90667	0.994154	14653	0	0.1106	0.10195	0.1019	0.866166	1655	1	0.1106
Kirrel3	2	0.91239	0.91229	0.994154	14726	0	0.14363	0.10195	0.1019	0.866166	1634	1	0.14363
Cryab	2	0.9128	0.91271	0.994154	14734	0	0.13587	0.10195	0.1019	0.866166	1596	1	0.13587
Cryba2	2	0.91832	0.91816	0.994154	14807	0	0.19076	0.10195	0.1019	0.866166	1598	1	0.19076
Trim16	2	0.92454	0.92438	0.994154	14887	0	0.22845	0.10195	0.1019	0.866166	1583	1	0.22845
Slc10a4	2	0.95642	0.95651	0.994154	15292	0	0.093863	0.10195	0.1019	0.866166	1591	1	0.093863
Gmppb	2	0.95642	0.95651	0.994154	15310	0	0.093863	0.10195	0.1019	0.866166	1602	1	0.093863
5430401F13Rik	2	0.95642	0.95651	0.994154	15320	0	0.093863	0.10195	0.1019	0.866166	1562	1	0.093863
Prr9	2	0.95642	0.95651	0.994154	15342	0	0.093863	0.10195	0.1019	0.866166	1569	1	0.093863
Odf2	2	0.95642	0.95651	0.994154	15349	0	0.093863	0.10195	0.1019	0.866166	1639	1	0.093863
Tlr1	2	0.95642	0.95651	0.994154	15354	0	0.093863	0.10195	0.1019	0.866166	1566	1	0.093863
Olfr180	2	0.95642	0.95651	0.994154	15369	0	0.093863	0.10195	0.1019	0.866166	1577	1	0.093863
Asic5	2	0.95642	0.95651	0.994154	15377	0	0.093863	0.10195	0.1019	0.866166	1626	1	0.093863
Vmn1r202	2	0.95642	0.95651	0.994154	15441	0	0.093863	0.10195	0.1019	0.866166	1590	1	0.093863
Wap	2	0.95642	0.95651	0.994154	15455	0	0.093863	0.10195	0.1019	0.866166	1561	1	0.093863
Kcnf1	2	0.95642	0.95651	0.994154	15459	0	0.093863	0.10195	0.1019	0.866166	1608	1	0.093863
Ttll2	2	0.95642	0.95651	0.994154	15497	0	0.093863	0.10195	0.1019	0.866166	1581	1	0.093863
Tia1	2	0.98177	0.98181	0.998995	15823	0	0.3238	0.10195	0.1019	0.866166	1617	1	0.3238
Mybphl	2	0.98825	0.98827	0.998995	15931	0	0.39352	0.10195	0.1019	0.866166	1565	1	0.39352
Triap1	2	0.98825	0.98827	0.998995	15933	0	0.39352	0.10195	0.1019	0.866166	1657	1	0.39352
Gpr179	2	0.98969	0.98968	0.998995	15953	0	0.40743	0.10195	0.1019	0.866166	1601	1	0.40743
mmu-mir-7048	2	0.98982	0.98982	0.998995	15954	0	0.3998	0.10195	0.1019	0.866166	1611	1	0.3998
Nsmce1	2	0.99016	0.99015	0.998995	15956	0	0.40189	0.10195	0.1019	0.866166	1585	1	0.40189
Scn10a	1	0.89764	0.89819	0.994154	14506	0	0.030212	0.10236	0.10229	0.866166	1671	0	0.030212
Ifnz	1	0.89764	0.89819	0.994154	14507	0	0.030212	0.10236	0.10229	0.866166	1668	0	0.030212
Olfr645	1	0.89764	0.89819	0.994154	14508	0	0.030212	0.10236	0.10229	0.866166	1669	0	0.030212
Rpsa	1	0.89764	0.89819	0.994154	14509	0	0.030212	0.10236	0.10229	0.866166	1659	0	0.030212
Slc25a15	1	0.89764	0.89819	0.994154	14510	0	0.030212	0.10236	0.10229	0.866166	1664	0	0.030212
Tomm22	1	0.89764	0.89819	0.994154	14511	0	0.030212	0.10236	0.10229	0.866166	1661	0	0.030212
NonTargetingControlGuideForMouse_0113	1	0.89764	0.89819	0.994154	14512	0	0.030212	0.10236	0.10229	0.866166	1660	0	0.030212
Gm6251	1	0.89764	0.89819	0.994154	14513	0	0.030212	0.10236	0.10229	0.866166	1662	0	0.030212
Bod1l	1	0.89764	0.89819	0.994154	14514	0	0.030212	0.10236	0.10229	0.866166	1666	0	0.030212
Sgcd	1	0.89764	0.89819	0.994154	14515	0	0.030212	0.10236	0.10229	0.866166	1665	0	0.030212
Mlx	1	0.89764	0.89819	0.994154	14516	0	0.030212	0.10236	0.10229	0.866166	1670	0	0.030212
Aph1a	1	0.89764	0.89819	0.994154	14517	0	0.030212	0.10236	0.10229	0.866166	1667	0	0.030212
Nkap	1	0.89764	0.89819	0.994154	14518	0	0.030212	0.10236	0.10229	0.866166	1663	0	0.030212
Dusp26	3	0.40643	0.56183	0.924505	7180	2	-1.3099	0.10277	0.10459	0.866166	1672	1	-1.3099
Sun3	1	0.89699	0.89753	0.994154	14499	0	0.045472	0.10301	0.10292	0.866166	1673	0	0.045472
Orm1	1	0.8916	0.89204	0.994154	14354	0	0.021002	0.1084	0.10829	0.866166	1775	0	0.021002
Dbi	1	0.8916	0.89204	0.994154	14355	0	0.021002	0.1084	0.10829	0.866166	1777	0	0.021002
St3gal1	1	0.8916	0.89204	0.994154	14356	0	0.021002	0.1084	0.10829	0.866166	1766	0	0.021002
Sall3	1	0.8916	0.89204	0.994154	14357	0	0.021002	0.1084	0.10829	0.866166	1776	0	0.021002
Apof	1	0.8916	0.89204	0.994154	14358	0	0.021002	0.1084	0.10829	0.866166	1781	0	0.021002
Usp17lc	1	0.8916	0.89204	0.994154	14359	0	0.021002	0.1084	0.10829	0.866166	1745	0	0.021002
1700029J07Rik	1	0.8916	0.89204	0.994154	14360	0	0.021002	0.1084	0.10829	0.866166	1744	0	0.021002
Sap30	1	0.8916	0.89204	0.994154	14361	0	0.021002	0.1084	0.10829	0.866166	1739	0	0.021002
Wdr52	1	0.8916	0.89204	0.994154	14362	0	0.021002	0.1084	0.10829	0.866166	1782	0	0.021002
Ttll3	1	0.8916	0.89204	0.994154	14363	0	0.021002	0.1084	0.10829	0.866166	1740	0	0.021002
Pira2	1	0.8916	0.89204	0.994154	14364	0	0.021002	0.1084	0.10829	0.866166	1695	0	0.021002
Pdrg1	1	0.8916	0.89204	0.994154	14365	0	0.021002	0.1084	0.10829	0.866166	1688	0	0.021002
Dnajb7	1	0.8916	0.89204	0.994154	14366	0	0.021002	0.1084	0.10829	0.866166	1702	0	0.021002
Olfr1053	1	0.8916	0.89204	0.994154	14367	0	0.021002	0.1084	0.10829	0.866166	1698	0	0.021002
Lrp5	1	0.8916	0.89204	0.994154	14368	0	0.021002	0.1084	0.10829	0.866166	1699	0	0.021002
Olfr418-ps1	1	0.8916	0.89204	0.994154	14369	0	0.021002	0.1084	0.10829	0.866166	1691	0	0.021002
Ceacam1	1	0.8916	0.89204	0.994154	14370	0	0.021002	0.1084	0.10829	0.866166	1768	0	0.021002
Nsmf	1	0.8916	0.89204	0.994154	14371	0	0.021002	0.1084	0.10829	0.866166	1773	0	0.021002
Tubb4b	1	0.8916	0.89204	0.994154	14372	0	0.021002	0.1084	0.10829	0.866166	1697	0	0.021002
mmu-mir-1946b	1	0.8916	0.89204	0.994154	14373	0	0.021002	0.1084	0.10829	0.866166	1694	0	0.021002
Pcdhb4	1	0.8916	0.89204	0.994154	14374	0	0.021002	0.1084	0.10829	0.866166	1692	0	0.021002
Gm13277	1	0.8916	0.89204	0.994154	14375	0	0.021002	0.1084	0.10829	0.866166	1743	0	0.021002
NonTargetingControlGuideForMouse_0979	1	0.8916	0.89204	0.994154	14376	0	0.021002	0.1084	0.10829	0.866166	1758	0	0.021002
NonTargetingControlGuideForMouse_0811	1	0.8916	0.89204	0.994154	14377	0	0.021002	0.1084	0.10829	0.866166	1749	0	0.021002
mmu-mir-3074-2	1	0.8916	0.89204	0.994154	14378	0	0.021002	0.1084	0.10829	0.866166	1759	0	0.021002
Coil	1	0.8916	0.89204	0.994154	14379	0	0.021002	0.1084	0.10829	0.866166	1757	0	0.021002
Ube2c	1	0.8916	0.89204	0.994154	14380	0	0.021002	0.1084	0.10829	0.866166	1760	0	0.021002
Grik2	1	0.8916	0.89204	0.994154	14381	0	0.021002	0.1084	0.10829	0.866166	1748	0	0.021002
Wdr65	1	0.8916	0.89204	0.994154	14382	0	0.021002	0.1084	0.10829	0.866166	1751	0	0.021002
Cep41	1	0.8916	0.89204	0.994154	14383	0	0.021002	0.1084	0.10829	0.866166	1752	0	0.021002
Upk3b	1	0.8916	0.89204	0.994154	14384	0	0.021002	0.1084	0.10829	0.866166	1753	0	0.021002
Osbpl2	1	0.8916	0.89204	0.994154	14385	0	0.021002	0.1084	0.10829	0.866166	1747	0	0.021002
Otud5	1	0.8916	0.89204	0.994154	14386	0	0.021002	0.1084	0.10829	0.866166	1750	0	0.021002
mmu-mir-762	1	0.8916	0.89204	0.994154	14387	0	0.021002	0.1084	0.10829	0.866166	1735	0	0.021002
Adat1	1	0.8916	0.89204	0.994154	14388	0	0.021002	0.1084	0.10829	0.866166	1738	0	0.021002
Hs2st1	1	0.8916	0.89204	0.994154	14389	0	0.021002	0.1084	0.10829	0.866166	1732	0	0.021002
Cyp19a1	1	0.8916	0.89204	0.994154	14390	0	0.021002	0.1084	0.10829	0.866166	1734	0	0.021002
Frzb	1	0.8916	0.89204	0.994154	14391	0	0.021002	0.1084	0.10829	0.866166	1733	0	0.021002
Mrpl3	1	0.8916	0.89204	0.994154	14392	0	0.021002	0.1084	0.10829	0.866166	1737	0	0.021002
Fshb	1	0.8916	0.89204	0.994154	14393	0	0.021002	0.1084	0.10829	0.866166	1755	0	0.021002
Ccdc135	1	0.8916	0.89204	0.994154	14394	0	0.021002	0.1084	0.10829	0.866166	1754	0	0.021002
Klhl20	1	0.8916	0.89204	0.994154	14395	0	0.021002	0.1084	0.10829	0.866166	1756	0	0.021002
Mecr	1	0.8916	0.89204	0.994154	14396	0	0.021002	0.1084	0.10829	0.866166	1736	0	0.021002
mmu-mir-1247	1	0.8916	0.89204	0.994154	14397	0	0.021002	0.1084	0.10829	0.866166	1746	0	0.021002
Cytip	1	0.8916	0.89204	0.994154	14398	0	0.021002	0.1084	0.10829	0.866166	1696	0	0.021002
Hccs	1	0.8916	0.89204	0.994154	14399	0	0.021002	0.1084	0.10829	0.866166	1701	0	0.021002
3425401B19Rik	1	0.8916	0.89204	0.994154	14400	0	0.021002	0.1084	0.10829	0.866166	1677	0	0.021002
mmu-mir-1953	1	0.8916	0.89204	0.994154	14401	0	0.021002	0.1084	0.10829	0.866166	1680	0	0.021002
mmu-mir-351	1	0.8916	0.89204	0.994154	14402	0	0.021002	0.1084	0.10829	0.866166	1689	0	0.021002
Nanos3	1	0.8916	0.89204	0.994154	14403	0	0.021002	0.1084	0.10829	0.866166	1693	0	0.021002
Rab13	1	0.8916	0.89204	0.994154	14404	0	0.021002	0.1084	0.10829	0.866166	1700	0	0.021002
Gk5	1	0.8916	0.89204	0.994154	14405	0	0.021002	0.1084	0.10829	0.866166	1690	0	0.021002
Skint10	1	0.8916	0.89204	0.994154	14406	0	0.021002	0.1084	0.10829	0.866166	1719	0	0.021002
Dnmt1	1	0.8916	0.89204	0.994154	14407	0	0.021002	0.1084	0.10829	0.866166	1718	0	0.021002
Pigb	1	0.8916	0.89204	0.994154	14408	0	0.021002	0.1084	0.10829	0.866166	1730	0	0.021002
Fbln2	1	0.8916	0.89204	0.994154	14409	0	0.021002	0.1084	0.10829	0.866166	1729	0	0.021002
Gm136	1	0.8916	0.89204	0.994154	14410	0	0.021002	0.1084	0.10829	0.866166	1676	0	0.021002
Cacfd1	1	0.8916	0.89204	0.994154	14411	0	0.021002	0.1084	0.10829	0.866166	1674	0	0.021002
Mapkapk2	1	0.8916	0.89204	0.994154	14412	0	0.021002	0.1084	0.10829	0.866166	1723	0	0.021002
Sfxn3	1	0.8916	0.89204	0.994154	14413	0	0.021002	0.1084	0.10829	0.866166	1684	0	0.021002
Bdh2	1	0.8916	0.89204	0.994154	14414	0	0.021002	0.1084	0.10829	0.866166	1774	0	0.021002
mmu-mir-8104	1	0.8916	0.89204	0.994154	14415	0	0.021002	0.1084	0.10829	0.866166	1778	0	0.021002
Suco	1	0.8916	0.89204	0.994154	14416	0	0.021002	0.1084	0.10829	0.866166	1765	0	0.021002
Pou2f3	1	0.8916	0.89204	0.994154	14417	0	0.021002	0.1084	0.10829	0.866166	1764	0	0.021002
Mndal	1	0.8916	0.89204	0.994154	14418	0	0.021002	0.1084	0.10829	0.866166	1741	0	0.021002
Clrn2	1	0.8916	0.89204	0.994154	14419	0	0.021002	0.1084	0.10829	0.866166	1742	0	0.021002
Frmd4b	1	0.8916	0.89204	0.994154	14420	0	0.021002	0.1084	0.10829	0.866166	1780	0	0.021002
Olfr1366	1	0.8916	0.89204	0.994154	14421	0	0.021002	0.1084	0.10829	0.866166	1779	0	0.021002
Cubn	1	0.8916	0.89204	0.994154	14422	0	0.021002	0.1084	0.10829	0.866166	1772	0	0.021002
Ncs1	1	0.8916	0.89204	0.994154	14423	0	0.021002	0.1084	0.10829	0.866166	1771	0	0.021002
mmu-mir-7234	1	0.8916	0.89204	0.994154	14424	0	0.021002	0.1084	0.10829	0.866166	1770	0	0.021002
Gcsam	1	0.8916	0.89204	0.994154	14425	0	0.021002	0.1084	0.10829	0.866166	1769	0	0.021002
Sars2	1	0.8916	0.89204	0.994154	14426	0	0.021002	0.1084	0.10829	0.866166	1762	0	0.021002
Rassf2	1	0.8916	0.89204	0.994154	14427	0	0.021002	0.1084	0.10829	0.866166	1761	0	0.021002
C2cd5	1	0.8916	0.89204	0.994154	14428	0	0.021002	0.1084	0.10829	0.866166	1767	0	0.021002
Ugt2b38	1	0.8916	0.89204	0.994154	14429	0	0.021002	0.1084	0.10829	0.866166	1763	0	0.021002
Olfr1496	1	0.8916	0.89204	0.994154	14430	0	0.021002	0.1084	0.10829	0.866166	1728	0	0.021002
Dlk1	1	0.8916	0.89204	0.994154	14431	0	0.021002	0.1084	0.10829	0.866166	1724	0	0.021002
Papola	1	0.8916	0.89204	0.994154	14432	0	0.021002	0.1084	0.10829	0.866166	1721	0	0.021002
Nat3	1	0.8916	0.89204	0.994154	14433	0	0.021002	0.1084	0.10829	0.866166	1683	0	0.021002
Nudt12	1	0.8916	0.89204	0.994154	14434	0	0.021002	0.1084	0.10829	0.866166	1722	0	0.021002
Pnma1	1	0.8916	0.89204	0.994154	14435	0	0.021002	0.1084	0.10829	0.866166	1726	0	0.021002
Zdhhc9	1	0.8916	0.89204	0.994154	14436	0	0.021002	0.1084	0.10829	0.866166	1720	0	0.021002
Spata32	1	0.8916	0.89204	0.994154	14437	0	0.021002	0.1084	0.10829	0.866166	1731	0	0.021002
Gpr142	1	0.8916	0.89204	0.994154	14438	0	0.021002	0.1084	0.10829	0.866166	1705	0	0.021002
Gys1	1	0.8916	0.89204	0.994154	14439	0	0.021002	0.1084	0.10829	0.866166	1675	0	0.021002
Gpr83	1	0.8916	0.89204	0.994154	14440	0	0.021002	0.1084	0.10829	0.866166	1685	0	0.021002
Nelfb	1	0.8916	0.89204	0.994154	14441	0	0.021002	0.1084	0.10829	0.866166	1678	0	0.021002
Maats1	1	0.8916	0.89204	0.994154	14442	0	0.021002	0.1084	0.10829	0.866166	1679	0	0.021002
Mfsd5	1	0.8916	0.89204	0.994154	14443	0	0.021002	0.1084	0.10829	0.866166	1681	0	0.021002
Hsd17b10	1	0.8916	0.89204	0.994154	14444	0	0.021002	0.1084	0.10829	0.866166	1682	0	0.021002
mmu-mir-190a	1	0.8916	0.89204	0.994154	14445	0	0.021002	0.1084	0.10829	0.866166	1686	0	0.021002
NonTargetingControlGuideForMouse_0338	1	0.8916	0.89204	0.994154	14446	0	0.021002	0.1084	0.10829	0.866166	1687	0	0.021002
NonTargetingControlGuideForMouse_0899	1	0.8916	0.89204	0.994154	14447	0	0.021002	0.1084	0.10829	0.866166	1716	0	0.021002
Ddx47	1	0.8916	0.89204	0.994154	14448	0	0.021002	0.1084	0.10829	0.866166	1715	0	0.021002
Apom	1	0.8916	0.89204	0.994154	14449	0	0.021002	0.1084	0.10829	0.866166	1711	0	0.021002
Eml5	1	0.8916	0.89204	0.994154	14450	0	0.021002	0.1084	0.10829	0.866166	1710	0	0.021002
H2afb3-ps	1	0.8916	0.89204	0.994154	14451	0	0.021002	0.1084	0.10829	0.866166	1707	0	0.021002
Cct7	1	0.8916	0.89204	0.994154	14452	0	0.021002	0.1084	0.10829	0.866166	1717	0	0.021002
Fis1	1	0.8916	0.89204	0.994154	14453	0	0.021002	0.1084	0.10829	0.866166	1704	0	0.021002
Gpd1	1	0.8916	0.89204	0.994154	14454	0	0.021002	0.1084	0.10829	0.866166	1709	0	0.021002
Sidt2	1	0.8916	0.89204	0.994154	14455	0	0.021002	0.1084	0.10829	0.866166	1708	0	0.021002
Nkx2-2	1	0.8916	0.89204	0.994154	14456	0	0.021002	0.1084	0.10829	0.866166	1706	0	0.021002
Ndufs8	1	0.8916	0.89204	0.994154	14457	0	0.021002	0.1084	0.10829	0.866166	1725	0	0.021002
Klk10	1	0.8916	0.89204	0.994154	14458	0	0.021002	0.1084	0.10829	0.866166	1727	0	0.021002
0610009D07Rik	1	0.8916	0.89204	0.994154	14459	0	0.021002	0.1084	0.10829	0.866166	1713	0	0.021002
Saa2	1	0.8916	0.89204	0.994154	14460	0	0.021002	0.1084	0.10829	0.866166	1712	0	0.021002
Rpl13a	1	0.8916	0.89204	0.994154	14461	0	0.021002	0.1084	0.10829	0.866166	1703	0	0.021002
Gp1bb	1	0.8916	0.89204	0.994154	14462	0	0.021002	0.1084	0.10829	0.866166	1714	0	0.021002
S100a8	2	0.98462	0.98469	0.998995	15892	0	0.5267	0.11016	0.10999	0.866166	1783	1	0.5267
Vmn1r82	2	0.70463	0.70607	0.958804	11451	1	-0.048964	0.11023	0.11006	0.866166	1784	1	-0.048964
Nme9	2	0.53172	0.56565	0.924505	9048	1	-0.534	0.11046	0.11028	0.866166	1785	1	-0.534
Haus7	2	0.089309	0.15309	0.901639	1955	1	-1.3096	0.11175	0.11156	0.866166	1794	1	-1.3096
Eif2s3y	2	0.18687	0.29805	0.921989	3791	1	-0.8406	0.11175	0.11156	0.866166	1797	1	-0.8406
Faf1	2	0.23399	0.3626	0.921989	4748	1	-0.77203	0.11175	0.11156	0.866166	1799	1	-0.77203
Fam227a	2	0.3326	0.43253	0.921989	6096	1	-0.91689	0.11175	0.11156	0.866166	1790	1	-0.91689
Chmp3	2	0.58004	0.6017	0.924505	9488	1	-0.40489	0.11175	0.11156	0.866166	1798	1	-0.40489
Zmym6	2	0.70463	0.70607	0.958804	11469	1	-0.27405	0.11175	0.11156	0.866166	1795	1	-0.27405
Slc25a16	2	0.78283	0.78231	0.958804	12211	0	-0.19324	0.11175	0.11156	0.866166	1787	1	-0.19324
Numa1	2	0.78796	0.78749	0.958804	12247	0	-0.094434	0.11175	0.11156	0.866166	1786	1	-0.094434
Pfkfb1	2	0.83561	0.83526	0.973802	13822	0	-0.11409	0.11175	0.11156	0.866166	1796	1	-0.11409
Ang2	2	0.87992	0.87984	0.994154	14212	0	-0.11093	0.11175	0.11156	0.866166	1791	1	-0.11093
Olfr1449	2	0.88291	0.88274	0.994154	14253	0	-0.12423	0.11175	0.11156	0.866166	1789	1	-0.12423
Ugdh	2	0.95642	0.95651	0.994154	15386	0	0.091762	0.11175	0.11156	0.866166	1793	1	0.091762
Il17d	2	0.98629	0.98637	0.998995	15905	0	0.39032	0.11175	0.11156	0.866166	1792	1	0.39032
Wisp3	2	0.99201	0.992	0.999196	16013	0	0.48517	0.11175	0.11156	0.866166	1788	1	0.48517
mmu-mir-802	4	0.020681	0.065493	0.899505	473	3	-2.0143	0.11178	0.11723	0.866166	1803	1	-2.0143
4921524L21Rik	4	0.51861	0.68346	0.958804	8864	2	-1.5801	0.11178	0.11723	0.866166	1802	1	-1.5801
mmu-mir-219b	4	0.91276	0.91575	0.994154	14731	1	0.067247	0.11178	0.11723	0.866166	1801	1	0.067247
Ap1g1	4	0.94452	0.94464	0.994154	15155	0	-0.53392	0.11178	0.11723	0.866166	1800	1	-0.53392
Nrip2	2	0.63125	0.64248	0.958804	10697	1	-0.44276	0.11305	0.11289	0.866166	1804	1	-0.44276
Gpr143	3	0.0013927	0.0039673	0.899505	39	1	0.037745	0.11315	0.11441	0.866166	1828	1	0.037745
Entpd4	3	0.0050234	0.013895	0.899505	120	2	-2.8895	0.11315	0.11441	0.866166	1832	1	-2.8895
Fcamr	3	0.049855	0.11963	0.901639	1107	2	-1.5716	0.11315	0.11441	0.866166	1818	1	-1.5716
mmu-mir-680-3	3	0.14552	0.28941	0.921989	3030	2	-1.7931	0.11315	0.11441	0.866166	1814	1	-1.7931
Slc15a3	3	0.14552	0.28941	0.921989	3044	1	-0.57831	0.11315	0.11441	0.866166	1806	1	-0.57831
0610010B08Rik	3	0.26677	0.41845	0.921989	4987	1	-0.78898	0.11315	0.11441	0.866166	1816	1	-0.78898
mmu-mir-6937	3	0.28443	0.43692	0.921989	5591	2	-1.5716	0.11315	0.11441	0.866166	1813	1	-1.5716
mmu-mir-6930	3	0.28443	0.43692	0.921989	5601	2	-1.5716	0.11315	0.11441	0.866166	1810	1	-1.5716
Atp6v1g1	3	0.28443	0.43692	0.921989	5634	2	-1.5716	0.11315	0.11441	0.866166	1817	1	-1.5716
Sema3f	3	0.43495	0.59028	0.924505	7350	2	-1.3099	0.11315	0.11441	0.866166	1820	1	-1.3099
9030624G23Rik	3	0.43495	0.59028	0.924505	7354	2	-1.3099	0.11315	0.11441	0.866166	1815	1	-1.3099
Ccdc80	3	0.43495	0.59028	0.924505	7372	2	-1.3099	0.11315	0.11441	0.866166	1826	1	-1.3099
Itgax	3	0.43495	0.59028	0.924505	7399	2	-1.3099	0.11315	0.11441	0.866166	1811	1	-1.3099
Uhmk1	3	0.43495	0.59028	0.924505	7404	2	-1.3099	0.11315	0.11441	0.866166	1827	1	-1.3099
Olfr1377	3	0.43495	0.59028	0.924505	7415	2	-1.3099	0.11315	0.11441	0.866166	1808	1	-1.3099
Surf1	3	0.45631	0.61162	0.938873	7445	1	0.039139	0.11315	0.11441	0.866166	1822	1	0.039139
Tubb2a	3	0.50168	0.65562	0.958804	8637	1	-0.76502	0.11315	0.11441	0.866166	1807	1	-0.76502
Cpm	3	0.61306	0.7037	0.958804	10636	1	-0.57831	0.11315	0.11441	0.866166	1831	1	-0.57831
Syn3	3	0.83947	0.84215	0.97445	13863	1	0.36547	0.11315	0.11441	0.866166	1829	1	0.36547
Fasn	3	0.83947	0.84215	0.97445	13946	1	-0.97942	0.11315	0.11441	0.866166	1823	1	-0.97942
Idua	3	0.8907	0.89066	0.994154	14345	0	0.29526	0.11315	0.11441	0.866166	1830	1	0.29526
Zfp740	3	0.93335	0.93355	0.994154	15009	0	-0.79721	0.11315	0.11441	0.866166	1821	1	-0.79721
mmu-mir-882	3	0.93335	0.93355	0.994154	15014	0	-0.47058	0.11315	0.11441	0.866166	1819	1	-0.47058
Prss55	3	0.93335	0.93355	0.994154	15062	0	-0.57831	0.11315	0.11441	0.866166	1805	1	-0.57831
Nrp1	3	0.96447	0.96464	0.996538	15609	0	-0.29757	0.11315	0.11441	0.866166	1824	1	-0.29757
Ubash3b	3	0.96505	0.96521	0.996538	15616	0	-0.57831	0.11315	0.11441	0.866166	1809	1	-0.57831
Pitx3	3	0.97153	0.97171	0.997101	15727	0	-0.29296	0.11315	0.11441	0.866166	1825	1	-0.29296
Zfp933	3	0.9909	0.99101	0.998995	16003	0	-0.57831	0.11315	0.11441	0.866166	1812	1	-0.57831
Gucy2g	1	0.88629	0.88672	0.994154	14318	0	0.031269	0.11371	0.11362	0.866166	1833	0	0.031269
Cdh4	1	0.88621	0.88665	0.994154	14317	0	0.041233	0.11379	0.11369	0.866166	1834	0	0.041233
Olfr961	1	0.88556	0.88599	0.994154	14301	0	0.025186	0.11444	0.11433	0.866166	1841	0	0.025186
Cdipt	1	0.88556	0.88599	0.994154	14302	0	0.025186	0.11444	0.11433	0.866166	1836	0	0.025186
Nfe2	1	0.88556	0.88599	0.994154	14303	0	0.025186	0.11444	0.11433	0.866166	1839	0	0.025186
Abca16	1	0.88556	0.88599	0.994154	14304	0	0.025186	0.11444	0.11433	0.866166	1840	0	0.025186
2310061I04Rik	1	0.88556	0.88599	0.994154	14305	0	0.025186	0.11444	0.11433	0.866166	1842	0	0.025186
Gm960	1	0.88556	0.88599	0.994154	14306	0	0.025186	0.11444	0.11433	0.866166	1838	0	0.025186
mmu-mir-8107	1	0.88556	0.88599	0.994154	14307	0	0.025186	0.11444	0.11433	0.866166	1844	0	0.025186
Clmp	1	0.88556	0.88599	0.994154	14308	0	0.025186	0.11444	0.11433	0.866166	1845	0	0.025186
Tbc1d9	1	0.88556	0.88599	0.994154	14309	0	0.025186	0.11444	0.11433	0.866166	1843	0	0.025186
Apool	1	0.88556	0.88599	0.994154	14310	0	0.025186	0.11444	0.11433	0.866166	1835	0	0.025186
Ebp	1	0.88556	0.88599	0.994154	14311	0	0.025186	0.11444	0.11433	0.866166	1837	0	0.025186
5330417C22Rik	2	0.0021394	0.0042103	0.899505	54	1	-1.8063	0.11449	0.11438	0.866166	1846	1	-1.8063
Myeov2	2	0.12314	0.20528	0.901639	2467	1	-0.92224	0.11449	0.11438	0.866166	1850	1	-0.92224
Slc39a6	2	0.33287	0.43269	0.921989	6099	1	-0.87461	0.11449	0.11438	0.866166	1855	1	-0.87461
Dhps	2	0.37145	0.45682	0.921989	6817	1	-0.57299	0.11449	0.11438	0.866166	1852	1	-0.57299
Kcnj6	2	0.37145	0.45682	0.921989	6899	1	-0.57299	0.11449	0.11438	0.866166	1853	1	-0.57299
Parp2	2	0.78426	0.78373	0.958804	12222	0	-0.14186	0.11449	0.11438	0.866166	1848	1	-0.14186
Snx13	2	0.83561	0.83526	0.973802	13684	0	-0.075501	0.11449	0.11438	0.866166	1854	1	-0.075501
Ift122	2	0.95642	0.95651	0.994154	15450	0	0.13035	0.11449	0.11438	0.866166	1847	1	0.13035
Zfp428	2	0.95642	0.95651	0.994154	15463	0	0.13035	0.11449	0.11438	0.866166	1849	1	0.13035
Slc17a1	2	0.99164	0.99162	0.999196	16011	0	0.52188	0.11449	0.11438	0.866166	1851	1	0.52188
NonTargetingControlGuideForMouse_0972	1	0.88483	0.88524	0.994154	14297	0	0.040211	0.11517	0.11503	0.866166	1856	0	0.040211
Fktn	1	0.88479	0.8852	0.994154	14296	0	0.040537	0.11521	0.11507	0.866166	1857	0	0.040537
NonTargetingControlGuideForMouse_0019	1	0.88475	0.88515	0.994154	14295	0	0.037807	0.11525	0.11511	0.866166	1858	0	0.037807
Cadm3	2	0.37145	0.45682	0.921989	6829	1	-0.55071	0.11609	0.11596	0.866166	1863	1	-0.55071
Olfr284	2	0.5187	0.55617	0.924505	8866	1	-0.65412	0.11609	0.11596	0.866166	1859	1	-0.65412
Olfr125	2	0.76938	0.76893	0.958804	12122	0	-0.23603	0.11609	0.11596	0.866166	1864	1	-0.23603
Spast	2	0.89444	0.89426	0.994154	14480	0	0.041098	0.11609	0.11596	0.866166	1862	1	0.041098
Zdhhc7	2	0.9029	0.90273	0.994154	14595	0	0.12072	0.11609	0.11596	0.866166	1861	1	0.12072
Pgbd5	2	0.99291	0.9929	0.999196	16032	0	0.63053	0.11609	0.11596	0.866166	1860	1	0.63053
Top1mt	2	0.081275	0.14026	0.901639	1862	1	-0.98847	0.11704	0.11691	0.866166	1866	1	-0.98847
Sorcs3	2	0.83561	0.83526	0.973802	13649	0	-0.038709	0.11704	0.11691	0.866166	1865	1	-0.038709
NonTargetingControlGuideForMouse_0383	1	0.88292	0.88331	0.994154	14254	0	0.018801	0.11708	0.11691	0.866166	1880	0	0.018801
Edc4	1	0.88292	0.88331	0.994154	14255	0	0.018801	0.11708	0.11691	0.866166	1881	0	0.018801
Vmn1r103	1	0.88292	0.88331	0.994154	14256	0	0.018801	0.11708	0.11691	0.866166	1874	0	0.018801
Elfn2	1	0.88292	0.88331	0.994154	14257	0	0.018801	0.11708	0.11691	0.866166	1867	0	0.018801
Pdhb	1	0.88292	0.88331	0.994154	14258	0	0.018801	0.11708	0.11691	0.866166	1888	0	0.018801
Krba1	1	0.88292	0.88331	0.994154	14259	0	0.018801	0.11708	0.11691	0.866166	1868	0	0.018801
NonTargetingControlGuideForMouse_0226	1	0.88292	0.88331	0.994154	14260	0	0.018801	0.11708	0.11691	0.866166	1876	0	0.018801
Fam184a	1	0.88292	0.88331	0.994154	14261	0	0.018801	0.11708	0.11691	0.866166	1869	0	0.018801
Tcf20	1	0.88292	0.88331	0.994154	14262	0	0.018801	0.11708	0.11691	0.866166	1889	0	0.018801
Wdr1	1	0.88292	0.88331	0.994154	14263	0	0.018801	0.11708	0.11691	0.866166	1882	0	0.018801
1810046K07Rik	1	0.88292	0.88331	0.994154	14264	0	0.018801	0.11708	0.11691	0.866166	1891	0	0.018801
Kcp	1	0.88292	0.88331	0.994154	14265	0	0.018801	0.11708	0.11691	0.866166	1887	0	0.018801
2010005H15Rik	1	0.88292	0.88331	0.994154	14266	0	0.018801	0.11708	0.11691	0.866166	1886	0	0.018801
Spata7	1	0.88292	0.88331	0.994154	14267	0	0.018801	0.11708	0.11691	0.866166	1879	0	0.018801
mmu-mir-701	1	0.88292	0.88331	0.994154	14268	0	0.018801	0.11708	0.11691	0.866166	1875	0	0.018801
Rps13	1	0.88292	0.88331	0.994154	14269	0	0.018801	0.11708	0.11691	0.866166	1890	0	0.018801
Eml3	1	0.88292	0.88331	0.994154	14270	0	0.018801	0.11708	0.11691	0.866166	1871	0	0.018801
BC048679	1	0.88292	0.88331	0.994154	14271	0	0.018801	0.11708	0.11691	0.866166	1878	0	0.018801
Bcor	1	0.88292	0.88331	0.994154	14272	0	0.018801	0.11708	0.11691	0.866166	1872	0	0.018801
Rnase4	1	0.88292	0.88331	0.994154	14273	0	0.018801	0.11708	0.11691	0.866166	1870	0	0.018801
Rsph6a	1	0.88292	0.88331	0.994154	14274	0	0.018801	0.11708	0.11691	0.866166	1885	0	0.018801
Bhlha15	1	0.88292	0.88331	0.994154	14275	0	0.018801	0.11708	0.11691	0.866166	1877	0	0.018801
Col19a1	1	0.88292	0.88331	0.994154	14276	0	0.018801	0.11708	0.11691	0.866166	1873	0	0.018801
mmu-mir-206	1	0.88292	0.88331	0.994154	14277	0	0.018801	0.11708	0.11691	0.866166	1884	0	0.018801
mmu-mir-216a	1	0.88292	0.88331	0.994154	14278	0	0.018801	0.11708	0.11691	0.866166	1883	0	0.018801
Cyp2d34	2	0.29371	0.40931	0.921989	5682	1	-0.61067	0.11753	0.11742	0.866166	1894	1	-0.61067
Zfp592	2	0.7811	0.78063	0.958804	12197	0	-0.12341	0.11753	0.11742	0.866166	1892	1	-0.12341
mmu-mir-1970	2	0.95642	0.95651	0.994154	15347	0	0.17735	0.11753	0.11742	0.866166	1893	1	0.17735
Arfrp1	2	0.045236	0.081105	0.901639	1055	1	-1.1348	0.11791	0.11779	0.866166	1895	1	-1.1348
Prss8	2	0.51987	0.55703	0.924505	8883	1	-0.50173	0.11799	0.11786	0.866166	1896	1	-0.50173
Map3k9	2	0.15097	0.24658	0.921989	3064	1	-0.75375	0.11829	0.11817	0.866166	1897	1	-0.75375
Car12	2	0.88382	0.88365	0.994154	14286	0	-0.043811	0.1184	0.11828	0.866166	1898	1	-0.043811
Ppp1r42	2	0.83561	0.83526	0.973802	13603	0	-0.0311	0.11867	0.11856	0.866166	1899	1	-0.0311
mmu-mir-3070a	2	0.9908	0.99077	0.998995	15985	0	0.46599	0.11874	0.11862	0.866166	1900	1	0.46599
Ift140	1	0.88116	0.88154	0.994154	14236	0	0.037766	0.11884	0.11867	0.866166	1901	0	0.037766
Adamts17	2	0.62899	0.6406	0.958804	10687	1	-0.16651	0.1189	0.11877	0.866166	1902	1	-0.16651
Gzmg	1	0.88108	0.88146	0.994154	14235	0	0.03682	0.11892	0.11875	0.866166	1903	0	0.03682
Ptk2	2	0.29371	0.40931	0.921989	5754	1	-0.6686	0.1192	0.11908	0.866166	1905	1	-0.6686
mmu-mir-5130	2	0.83561	0.83526	0.973802	13817	0	-0.086433	0.1192	0.11908	0.866166	1904	1	-0.086433
Hist1h2bn	2	0.29371	0.40931	0.921989	5825	1	-0.59466	0.11965	0.11952	0.866166	1906	1	-0.59466
Slc7a14	1	0.88015	0.88052	0.994154	14217	0	0.0168	0.11985	0.1197	0.866166	1907	0	0.0168
l7Rn6	1	0.88015	0.88052	0.994154	14218	0	0.0168	0.11985	0.1197	0.866166	1908	0	0.0168
Igfbp1	1	0.88015	0.88052	0.994154	14219	0	0.0168	0.11985	0.1197	0.866166	1909	0	0.0168
Usp21	1	0.88015	0.88052	0.994154	14220	0	0.0168	0.11985	0.1197	0.866166	1910	0	0.0168
Ism1	1	0.88015	0.88052	0.994154	14221	0	0.0168	0.11985	0.1197	0.866166	1911	0	0.0168
Hspa2	1	0.88015	0.88052	0.994154	14222	0	0.0168	0.11985	0.1197	0.866166	1912	0	0.0168
Gmfg	1	0.88015	0.88052	0.994154	14223	0	0.0168	0.11985	0.1197	0.866166	1913	0	0.0168
2310061N02Rik	1	0.88015	0.88052	0.994154	14224	0	0.0168	0.11985	0.1197	0.866166	1914	0	0.0168
Raver1	1	0.88015	0.88052	0.994154	14225	0	0.0168	0.11985	0.1197	0.866166	1915	0	0.0168
Sec63	1	0.88015	0.88052	0.994154	14226	0	0.0168	0.11985	0.1197	0.866166	1916	0	0.0168
Dll1	1	0.88015	0.88052	0.994154	14227	0	0.0168	0.11985	0.1197	0.866166	1917	0	0.0168
Rgs9bp	1	0.88015	0.88052	0.994154	14228	0	0.0168	0.11985	0.1197	0.866166	1918	0	0.0168
Qrich1	1	0.88015	0.88052	0.994154	14229	0	0.0168	0.11985	0.1197	0.866166	1919	0	0.0168
Capn5	1	0.88015	0.88052	0.994154	14230	0	0.0168	0.11985	0.1197	0.866166	1920	0	0.0168
Pmm2	2	0.70463	0.70607	0.958804	11497	1	-0.26769	0.12003	0.11989	0.866166	1923	1	-0.26769
Vmn1r52	2	0.70463	0.70607	0.958804	11682	1	-0.26769	0.12003	0.11989	0.866166	1921	1	-0.26769
Olfr492	2	0.83561	0.83526	0.973802	13533	0	-0.10773	0.12003	0.11989	0.866166	1924	1	-0.10773
Cd48	2	0.91359	0.91348	0.994154	14752	0	0.15453	0.12003	0.11989	0.866166	1922	1	0.15453
Olfr297	2	0.23399	0.3626	0.921989	4737	1	-0.66502	0.12041	0.12027	0.866166	1925	1	-0.66502
Tmx3	2	0.068105	0.11899	0.901639	1453	1	-1.1335	0.12064	0.12049	0.866166	1926	0	-1.1335
Phf13	1	0.87926	0.87963	0.994154	14205	0	0.033909	0.12074	0.12052	0.866166	1927	0	0.033909
7530416G11Rik	1	0.87906	0.87941	0.994154	14203	0	0.030579	0.12094	0.12072	0.866166	1928	0	0.030579
Cdk11b	1	0.87886	0.87922	0.994154	14201	0	0.014599	0.12114	0.12091	0.866166	1929	0	0.014599
Mettl7a3	1	0.87886	0.87922	0.994154	14202	0	0.014599	0.12114	0.12091	0.866166	1930	0	0.014599
Pax6	1	0.8787	0.87905	0.994154	14200	0	0.031076	0.1213	0.12106	0.866166	1931	0	0.031076
Gatad1	1	0.87866	0.87901	0.994154	14199	0	0.030977	0.12134	0.1211	0.866166	1932	0	0.030977
Sfxn1	2	0.37145	0.45682	0.921989	6844	1	-0.63609	0.12143	0.12127	0.866166	1937	0	-0.63609
Ucn3	2	0.469	0.52137	0.924505	8552	1	-0.54013	0.12143	0.12127	0.866166	1936	0	-0.54013
Zfp62	2	0.58004	0.6017	0.924505	9214	1	-0.42941	0.12143	0.12127	0.866166	1935	0	-0.42941
Acox1	2	0.58004	0.6017	0.924505	9285	1	-0.42941	0.12143	0.12127	0.866166	1941	0	-0.42941
Nme8	1	0.87857	0.87893	0.994154	14198	0	0.030076	0.12143	0.12119	0.866166	1933	0	0.030076
Wnt9b	2	0.95642	0.95651	0.994154	15325	0	0.067247	0.12143	0.12127	0.866166	1939	0	0.067247
Naip6	2	0.95642	0.95651	0.994154	15445	0	0.067247	0.12143	0.12127	0.866166	1940	0	0.067247
Sdf4	2	0.97901	0.97906	0.998995	15798	0	0.069348	0.12143	0.12127	0.866166	1938	0	0.069348
Ncoa5	2	0.99414	0.99412	0.999196	16049	0	0.61594	0.12143	0.12127	0.866166	1934	0	0.61594
Cfc1	1	0.87853	0.87889	0.994154	14197	0	0.029189	0.12147	0.12124	0.866166	1942	0	0.029189
Tpo	1	0.87849	0.87883	0.994154	14196	0	0.024569	0.12151	0.12128	0.866166	1943	0	0.024569
mmu-mir-1930	1	0.87841	0.87875	0.994154	14195	0	0.024574	0.12159	0.12136	0.866166	1944	0	0.024574
H2-T24	1	0.87837	0.87871	0.994154	14194	0	0.023863	0.12163	0.1214	0.866166	1945	0	0.023863
Trpm1	1	0.87821	0.87857	0.994154	14193	0	0.020506	0.12179	0.12157	0.866166	1946	0	0.020506
Thbs2	1	0.87805	0.87842	0.994154	14184	0	0.019481	0.12195	0.12174	0.866166	1947	0	0.019481
Kcnk16	1	0.87785	0.87822	0.994154	14183	0	0.014883	0.12215	0.12196	0.866166	1948	0	0.014883
Csn1s1	1	0.87777	0.87814	0.994154	14182	0	0.016309	0.12223	0.12204	0.866166	1949	0	0.016309
Zcchc11	1	0.87769	0.87808	0.994154	14181	0	0.012038	0.12231	0.12212	0.866166	1950	0	0.012038
Osgepl1	2	0.70463	0.70607	0.958804	11706	1	-0.20353	0.12238	0.12219	0.866166	1951	0	-0.20353
Dnajc24	2	0.70463	0.70607	0.958804	11405	1	-0.18864	0.12246	0.12226	0.866166	1952	0	-0.18864
Epor	1	0.87752	0.87791	0.994154	14180	0	0.01096	0.12248	0.1223	0.866166	1953	0	0.01096
Rbm6	1	0.87732	0.87772	0.994154	14179	0	0.0037306	0.12268	0.12251	0.866166	1954	0	0.0037306
Man1b1	1	0.87724	0.87763	0.994154	14175	0	0.0038063	0.12276	0.12259	0.866166	1955	0	0.0038063
Adora2b	2	0.70463	0.70607	0.958804	11648	1	-0.3464	0.12283	0.12265	0.866166	1956	0	-0.3464
Utp14a	2	0.98825	0.98827	0.998995	15930	0	0.31906	0.12283	0.12265	0.866166	1957	0	0.31906
Olfr1494	1	0.8771	0.87748	0.994154	14174	0	-0.010248	0.1229	0.12273	0.866166	1958	0	-0.010248
Klhdc2	2	0.469	0.52137	0.924505	8446	1	-0.47917	0.12299	0.12281	0.866166	1959	0	-0.47917
Veph1	1	0.87696	0.87734	0.994154	14172	0	-0.018325	0.12304	0.12288	0.866166	1960	0	-0.018325
Smad5	3	0.93335	0.93355	0.994154	15038	0	-0.99	0.12312	0.12383	0.866166	1961	1	-0.99
Aptx	1	0.87684	0.87722	0.994154	14171	0	-0.017403	0.12316	0.12299	0.866166	1962	0	-0.017403
Atp10a	1	0.8768	0.87719	0.994154	14170	0	-0.023271	0.1232	0.12303	0.866166	1963	0	-0.023271
Olfr212	1	0.87676	0.87714	0.994154	14169	0	-0.028888	0.12324	0.12307	0.866166	1964	0	-0.028888
Rap2a	1	0.87664	0.87702	0.994154	14167	0	-0.037203	0.12336	0.12319	0.866166	1965	0	-0.037203
Slc10a1	1	0.87643	0.87684	0.994154	14166	0	-0.033172	0.12357	0.1234	0.866166	1966	0	-0.033172
Rpf1	1	0.87639	0.8768	0.994154	14165	0	-0.04323	0.12361	0.12344	0.866166	1967	0	-0.04323
mmu-mir-450a-1	1	0.87627	0.8767	0.994154	14164	0	-0.0029848	0.12373	0.12357	0.866166	1968	0	-0.0029848
Wbscr17	3	0.67616	0.735	0.958804	11026	1	-0.46112	0.12379	0.12447	0.866166	1969	1	-0.46112
Ivns1abp	3	0.93335	0.93355	0.994154	15013	0	-0.57831	0.12379	0.12447	0.866166	1970	1	-0.57831
NonTargetingControlGuideForMouse_0499	1	0.87619	0.87662	0.994154	14163	0	-0.012689	0.12381	0.12365	0.866166	1971	0	-0.012689
NonTargetingControlGuideForMouse_0129	1	0.87607	0.87651	0.994154	14162	0	-0.0087285	0.12393	0.12375	0.866166	1972	0	-0.0087285
Hdac5	2	0.0078601	0.01488	0.899505	184	1	-1.799	0.12397	0.12379	0.866166	1977	0	-1.799
Nop56	2	0.29371	0.40931	0.921989	5736	1	-0.76958	0.12397	0.12379	0.866166	1982	0	-0.76958
Tmem38a	2	0.469	0.52137	0.924505	8603	1	-0.58894	0.12397	0.12379	0.866166	1973	0	-0.58894
Dapk2	2	0.77178	0.77138	0.958804	12134	0	-0.22267	0.12397	0.12379	0.866166	1975	0	-0.22267
Pabpn1l	2	0.78881	0.78836	0.958804	12256	0	-0.21281	0.12397	0.12379	0.866166	1980	0	-0.21281
Atf3	1	0.87603	0.87647	0.994154	14161	0	-0.043298	0.12397	0.1238	0.866166	1986	0	-0.043298
Vegfa	2	0.8818	0.88167	0.994154	14242	0	-0.20529	0.12397	0.12379	0.866166	1983	0	-0.20529
P2rx3	2	0.88441	0.88424	0.994154	14292	0	0.029373	0.12397	0.12379	0.866166	1984	0	0.029373
Zbtb1	2	0.89604	0.89583	0.994154	14489	0	-0.082753	0.12397	0.12379	0.866166	1974	0	-0.082753
Yipf6	2	0.90629	0.90611	0.994154	14646	0	0.16022	0.12397	0.12379	0.866166	1985	0	0.16022
Abhd3	2	0.95642	0.95651	0.994154	15394	0	0.018435	0.12397	0.12379	0.866166	1979	0	0.018435
Foxred1	2	0.95642	0.95651	0.994154	15425	0	0.018435	0.12397	0.12379	0.866166	1981	0	0.018435
Adrbk2	2	0.98082	0.98088	0.998995	15820	0	0.21847	0.12397	0.12379	0.866166	1976	0	0.21847
Map3k8	2	0.99354	0.99355	0.999196	16034	0	0.48384	0.12397	0.12379	0.866166	1978	0	0.48384
Txn1	1	0.87587	0.87631	0.994154	14160	0	-0.043868	0.12413	0.12395	0.866166	1987	0	-0.043868
Adam26a	1	0.87583	0.87627	0.994154	14159	0	-0.04003	0.12417	0.12399	0.866166	1988	0	-0.04003
Phf6	1	0.87579	0.87623	0.994154	14158	0	-0.016714	0.12421	0.12403	0.866166	1989	0	-0.016714
1700017B05Rik	1	0.87575	0.8762	0.994154	14157	0	-0.02557	0.12425	0.12407	0.866166	1990	0	-0.02557
Fabp7	1	0.87546	0.87592	0.994154	14156	0	-0.034513	0.12454	0.12433	0.866166	1991	0	-0.034513
1810024B03Rik	1	0.87538	0.87583	0.994154	14155	0	-0.050729	0.12462	0.12442	0.866166	1992	0	-0.050729
Mark3	1	0.8753	0.87575	0.994154	14154	0	-0.022136	0.1247	0.12451	0.866166	1993	0	-0.022136
Mpp2	1	0.87522	0.87567	0.994154	14153	0	-0.061436	0.12478	0.12459	0.866166	1994	0	-0.061436
Srgap3	1	0.87498	0.8754	0.994154	14152	0	-0.042001	0.12502	0.12482	0.866166	1995	0	-0.042001
Oprm1	2	0.98825	0.98827	0.998995	15940	0	0.41417	0.12503	0.12482	0.866166	1996	0	0.41417
Ighmbp2	1	0.8749	0.87531	0.994154	14151	0	-0.029636	0.1251	0.12489	0.866166	1997	0	-0.029636
Cda	4	0.37915	0.58075	0.924505	6988	2	-0.91338	0.12523	0.12929	0.866166	1998	1	-0.91338
[truncated: 14,140 more rows]

## Sheet: top20_pos score
id	num	neg|score	neg|p-value	neg|fdr	neg|rank	neg|goodsgrna	neg|lfc	pos|score	pos|p-value	pos|fdr	pos|rank	pos|goodsgrna	pos|lfc
Cebpd	4	0.99262	0.99262	0.999196	16014	0	1.3602	0.00075331	0.0020777	0.866166	19	3	1.3602
Manea	3	0.83947	0.84215	0.97445	13949	1	2.4482	1.7882e-05	6.1045e-05	0.497525	1	2	2.4482
Htr1f	2	0.99993	0.99993	0.999934	16138	0	2.233	6.6888e-05	0.00011688	0.628713	3	2	2.233
Ifit3	3	0.83947	0.84215	0.97445	13897	1	1.9101	0.00026062	0.00075187	0.866166	7	2	1.9101
Phf8	2	0.9997	0.9997	0.999822	16136	0	1.8277	0.00030301	0.00058254	0.866166	8	2	1.8277
mmu-mir-8109	2	0.99961	0.99961	0.999794	16135	0	1.9351	0.00039404	0.00076107	0.866166	10	2	1.9351
Hand1	2	0.9995	0.9995	0.999788	16131	0	1.6794	0.00050335	0.00099237	0.866166	14	2	1.6794
Casp4	2	0.99933	0.99934	0.999788	16130	0	2.113	0.00067336	0.0013151	0.866166	18	2	2.113
Procr	2	0.081275	0.14026	0.901639	1856	1	0.18311	4.0387e-05	6.1659e-05	0.497525	2	1	0.18311
Creb1	1	0.99984	0.99986	0.99992	16137	0	3.0386	0.00016155	0.00016166	0.652228	4	1	3.0386
Itln1	2	0.83561	0.83526	0.973802	13615	0	1.0538	0.00020193	0.00040523	0.866166	5	1	1.0538
Trip13	4	0.86923	0.88697	0.994154	14107	1	-0.059773	0.0002423	0.00068929	0.866166	6	1	-0.059773
Csrp1	2	0.95642	0.95651	0.994154	15327	0	1.2301	0.00032308	0.00062794	0.866166	9	1	1.2301
2410124H12Rik	1	0.99952	0.99954	0.999788	16132	0	2.8456	0.00048465	0.00048499	0.866166	13	1	2.8456
Ctxn3	1	0.99952	0.99954	0.999788	16133	0	2.8456	0.00048465	0.00048499	0.866166	11	1	2.8456
Shf	1	0.99952	0.99954	0.999788	16134	0	2.8456	0.00048465	0.00048499	0.866166	12	1	2.8456
Olfr170	2	0.3232	0.42683	0.921989	6030	1	0.67679	0.00060572	0.0011764	0.866166	16	1	0.67679
Cab39l	2	0.91302	0.91293	0.994154	14743	0	1.2083	0.00060572	0.0011764	0.866166	15	1	1.2083
Alox12b	3	0.93335	0.93355	0.994154	15068	0	-0.99	0.00066625	0.0015323	0.866166	17	1	-0.99
Atg4d	2	0.83561	0.83526	0.973802	13729	0	0.95844	0.00076722	0.001482	0.866166	20	1	0.95844
