# Supplementary material for: C/EBPδ-induced epigenetic changes control the dynamic gene transcription of S100a8 and S100a9
Source: eLife. 2022 May 11;11:e75594. doi: 10.7554/eLife.75594 (PMC9122501; doi:10.7554/eLife.75594)
Supplement: Figure 5—source data 1. [file elife-75594-fig5-data1.xlsx]

## Sheet: Tabelle1
Expression changes in the BioNRW monocytes dataset (RNA-seq, n=26), related to Figure 5.
Comparison	CEBPD			S100A8			S100A9			ATF3			FBXW7
	LCF	SE	adj.p	LCF	SE	adj.p	LCF	SE	adj.p	LCF	SE	adj.p	adj.p	LCF	SE
2_Ctrl vs 3_Ctrl	n.s.	n.s.	n.s.	n.s.	n.s.	n.s.	1409	0.477	4.51E-02	n.s.	n.s.	n.s.	n.s.	n.s.	n.s.
2_sCAD vs 3_sCAD	n.s.	n.s.	n.s.	2105	0.553	6.06E-03	n.s.	n.s.	n.s.	n.s.	n.s.	n.s.	n.s.	n.s.	n.s.
2_MI vs 3_MI	n.s.	n.s.	n.s.	n.s.	n.s.	n.s.	n.s.	n.s.	n.s.	1203	0.321	2.00E-03	n.s.	n.s.	n.s.
1_sCAD vs 1_Ctrl	n.s.	n.s.	n.s.	n.s.	n.s.	n.s.	n.s.	n.s.	n.s.	n.s.	n.s.	n.s.	n.s.	n.s.	n.s.
2_sCAD vs 2_Ctrl	n.s.	n.s.	n.s.	n.s.	n.s.	n.s.	n.s.	n.s.	n.s.	n.s.	n.s.	n.s.	n.s.	n.s.	n.s.
3_sCAD vs 3_Ctrl	n.s.	n.s.	n.s.	n.s.	n.s.	n.s.	n.s.	n.s.	n.s.	n.s.	n.s.	n.s.	n.s.	n.s.	n.s.
1_MI vs 1_Ctrl	n.s.	n.s.	n.s.	n.s.	n.s.	n.s.	n.s.	n.s.	n.s.	n.s.	n.s.	n.s.	n.s.	n.s.	n.s.
2_MI vs 2_Ctrl	n.s.	n.s.	n.s.	n.s.	n.s.	n.s.	n.s.	n.s.	n.s.	n.s.	n.s.	n.s.	n.s.	n.s.	n.s.
3_MI vs 3_Ctrl	n.s.	n.s.	n.s.	n.s.	n.s.	n.s.	n.s.	n.s.	n.s.	-1336	0.322	2.25E-03	n.s.	n.s.	n.s.
1_sCAD vs 1_MI	n.s.	n.s.	n.s.	n.s.	n.s.	n.s.	n.s.	n.s.	n.s.	n.s.	n.s.	n.s.	n.s.	n.s.	n.s.
2_sCAD vs 2_MI	n.s.	n.s.	n.s.	n.s.	n.s.	n.s.	n.s.	n.s.	n.s.	n.s.	n.s.	n.s.	n.s.	n.s.	n.s.
3_sCAD vs 3_MI	n.s.	n.s.	n.s.	-2054	0.553	4.36E-03	-1491	0.520	3.63E-02	1814	0.356	3.91E-05	n.s.	n.s.	n.s.
1 = classical, 2 = intermediate, 3 = non-classical
Ctrl = healthy donors, MI = myocardial infarction, sCAD = coronary artery disease
LCF = log2 fold change, SE = standard error, n.s. = non-significant
