# Supplementary material for: C/EBPδ-induced epigenetic changes control the dynamic gene transcription of S100a8 and S100a9
Source: eLife. 2022 May 11;11:e75594. doi: 10.7554/eLife.75594 (PMC9122501; doi:10.7554/eLife.75594)
Supplement: Figure 7—source data 1. [file elife-75594-fig7-data1.xlsx]

## Sheet: WT_d3_vs_d0
name	Chr	Peak Start	Peak End	length	Gene Start	Gene End	location	distance	Entrez id	Gene symbol	End	baseMean	log2FoldChange	lfcSE	stat	pvalue	padj	regulation
Peak_16598	chr11	101604564	101605722	1159	101610700	101615956	upstream	4977	666331	LOC666331	101605722	1051.7493787549	-3.04044954191948	0.130454965776052	-23.3065067614131	3.80846395536521e-120	9.00758852403202e-116	gained-close
Peak_77532	chr7	24477582	24479961	2380	24482023	24504533	upstream	2061	260299	Cadm4	24479961	691.359293890892	3.84373146640318	0.178192618127476	21.5706548722093	3.38863044641169e-103	3.20584772013224e-99	gained-open
Peak_28505	chr14	56102232	56102740	509	56099885	56102574	overlapStart	0	13035	Ctsg	56102740	346.024212584463	-4.1083095236963	0.191694844161527	-21.4315076739077	6.79440804675654e-102	5.35659806392874e-98	gained-close
Peak_36375	chr16	36366647	36367834	1188	36359382	36367570	overlapStart	0	100034684	BC100530	36367834	561.408000019043	3.66148687598077	0.181327982216371	20.1926190940109	1.13675675838858e-90	6.32611822847708e-87	gained-open
Peak_47656	chr19	53889558	53890061	504	53892231	53929861	upstream	2169	18569	Pdcd4	53890061	492.799871951425	-3.07972810374986	0.153100922796984	-20.1156730311395	5.38038944987272e-90	2.67903749628768e-86	gained-close
Peak_85132	chr8	84699883	84700271	389	84701457	84704716	upstream	1185	17095	Lyl1	84700271	482.607772441321	-2.8020038089711	0.151199173425833	-18.53187253266	1.14241328476574e-76	3.1787985652514e-73	gained-close
Peak_36383	chr16	36407877	36408647	771	36403946	36408363	overlapStart	0	20862	Stfa2	36408647	383.684053055829	4.68877907905228	0.258781198636472	18.1187006774744	2.26890076119669e-73	5.36629063534435e-70	gained-open
Peak_15321	chr11	83592377	83593366	990	83587886	83593087	overlapStart	0	20305	Ccl6	83593366	598.155981229031	2.936328535114	0.166675762220486	17.6170097919198	1.82394481314231e-69	3.83458051093648e-66	gained-open
Peak_25220	chr13	67759886	67760341	456	67747800	67755134	upstream	4751	22746	Zfp85	67760341	252.960666614496	-3.34945362422794	0.192432545433375	-17.4058583317322	7.44812321976257e-68	1.4992279687848e-64	gained-close
Peak_28506	chr14	56105080	56105344	265	56099885	56102574	upstream	2505	13035	Ctsg	56105344	217.916794695243	-3.21736320698998	0.196561669343909	-16.3682126720282	3.22547978642442e-60	3.81437175843085e-57	gained-close
Peak_5149	chr1	171066563	171066918	356	171064591	171064652	upstream	1910	102466998	Mir6546	171066918	991.60323475401	-2.54414271178003	0.157390656149577	-16.1645092156055	8.97498077871473e-59	9.87310501803588e-56	gained-close
Peak_36389	chr16	36454617	36455985	1369	36450537	36455392	overlapStart	0	20863	Stfa3	36455985	599.369508669255	3.10102928761284	0.19380693792671	16.000610302122	1.26528644647061e-57	1.28713644682579e-54	gained-open
Peak_25225	chr13	67811664	67812180	517	67813816	67827000	upstream	1635	212569	Zfp273	67812180	536.52453289304	-2.55973450677302	0.160655828740443	-15.9330322892209	3.73782701357891e-57	3.72232486785943e-54	gained-close
Peak_41750	chr17	84506191	84507039	849	84511895	84622142	upstream	4855	213556	Plekhh2	84507039	301.590897064966	-3.04157218614437	0.191693850334681	-15.8668219185647	1.07550604765392e-56	1.02777096105401e-53	gained-close
Peak_67534	chr5	57714721	57716172	1452	57718081	58133235	upstream	1908	54216	Pcdh7	57716172	775.6367868013	-2.19256860773838	0.139079784966026	-15.7648259829707	5.43217438922672e-56	4.98947854628333e-53	gained-close
Peak_66407	chr5	24392708	24392924	217	24384181	24392143	upstream	564	213948	Atg9b	24392924	173.668885855304	-3.92452482414725	0.251834542746671	-15.5837431249257	9.38919389684891e-55	7.86083254694945e-52	gained-close
Peak_66407	chr5	24392708	24392924	217	24394156	24409947	upstream	1231	74610	Abcb8	24392924	173.668885855304	-3.92452482414725	0.251834542746671	-15.5837431249257	9.38919389684891e-55	7.86083254694945e-52	gained-close
Peak_36332	chr16	35981596	35981820	225	35983363	36036162	upstream	1542	16646	Kpna1	35981820	9384.2111629123	-2.85946538043064	0.190790419193768	-14.9874684091267	8.86690612671115e-51	5.94937958172791e-48	gained-close
Peak_5148	chr1	171063893	171065970	2078	171064591	171064652	includeFeature	0	102466998	Mir6546	171065970	5650.0700353561	-1.75289009181662	0.11820792858233	-14.8288707266853	9.53230674331484e-50	5.97227425005327e-47	gained-close
Peak_5148	chr1	171063893	171065970	2078	171051169	171059403	upstream	4489	14131	Fcgr3	171065970	5650.0700353561	-1.75289009181662	0.11820792858233	-14.8288707266853	9.53230674331484e-50	5.97227425005327e-47	gained-close
Peak_40804	chr17	56006986	56007486	501	55997076	56005606	upstream	1379	106766	Stap2	56007486	479.945960716233	-2.15721174357583	0.14603214566761	-14.7721704266809	2.21464555288871e-49	1.33451437692095e-46	gained-close
Peak_40804	chr17	56006986	56007486	501	56009201	56016790	upstream	1714	68047	Mpnd	56007486	479.945960716233	-2.15721174357583	0.14603214566761	-14.7721704266809	2.21464555288871e-49	1.33451437692095e-46	gained-close
Peak_23013	chr13	21896713	21897266	554	21896918	21897049	includeFeature	0	100316716	Mir1983	21897266	123.555483523971	-3.91372940256719	0.269327140707221	-14.5315076389635	7.65176168194753e-48	4.1844078941175e-45	gained-close
Peak_27952	chr14	44861120	44861542	423	44851235	44859375	upstream	1744	19214	Ptgdr	44861542	147.006861691385	-3.38574955743286	0.233812516953681	-14.4806172122239	1.60648114624182e-47	8.53835704052548e-45	gained-close
Peak_36341	chr16	36156524	36157395	872	36156811	36161948	overlapStart	0	268885	Stfa2l1	36157395	306.614940244786	3.16495852715166	0.218620506568255	14.4769517591596	1.6944670544453e-47	8.95568436608113e-45	gained-open
Peak_20048	chr12	75307906	75309035	1130	75308313	75401455	overlapStart	0	80837	Rhoj	75309035	558.886531566348	-1.99361009125514	0.141766637765656	-14.0626181355209	6.44567278492609e-45	3.1271759973883e-42	gained-close
Peak_28507	chr14	56105548	56106106	559	56099885	56102574	upstream	2973	13035	Ctsg	56106106	280.66123401815	-2.47433522106102	0.176227893937571	-14.0405424236503	8.80362158674023e-45	4.20644153452094e-42	gained-close
Peak_18501	chr12	11209475	11210259	785	11208382	11208948	upstream	526	56184	Msgn1	11210259	280.439672572604	-2.49999726803026	0.178171404981945	-14.0314169284549	1.00130791898034e-44	4.76028829060572e-42	gained-close
Peak_63911	chr4	129263241	129264158	918	129219578	129261404	upstream	1836	97130	C77080	129264158	499.494308401466	-1.95546358591953	0.141156997974351	-13.8531111739487	1.21819297574932e-43	5.46200780396875e-41	gained-close
Peak_58335	chr3	96340772	96341328	557	96345287	96358480	upstream	3958	100504145	Platr30	96341328	242.582270332018	-2.45613466457976	0.179733775152671	-13.6654040816393	1.63394236737371e-42	6.80972474042981e-40	gained-close
Peak_3685	chr1	133800860	133801676	817	133702674	133800754	upstream	105	381290	Atp2b4	133801676	475.379070484294	-2.25083634775404	0.164766241911115	-13.6607858602995	1.74094731808631e-42	7.223862367319e-40	gained-close
Peak_34960	chr16	13447303	13448262	960	13449523	13449601	upstream	1260	100124432	Mir193b	13448262	140.677166657106	-2.97360924934504	0.221023128847188	-13.4538374551785	2.92300315139393e-41	1.10172763402699e-38	gained-close
Peak_1599	chr1	64529826	64530253	428	64532804	64604548	upstream	2550	12912	Creb1	64530253	207.826213541912	-2.47320615366537	0.185388210144102	-13.3406873702645	1.34216243182305e-40	4.90257216312939e-38	gained-close
Peak_71224	chr5	142550834	142551440	607	142484839	142551098	overlapStart	0	231858	Radil	142551440	207.31562968282	-2.5730033522852	0.193616424306882	-13.2891791669853	2.67496516434406e-40	9.62234807368571e-38	gained-close
Peak_56096	chr3	19953811	19954322	512	19957054	20009750	upstream	2731	12870	Cp	19954322	284.924647129027	-3.06922743693521	0.231008405454426	-13.2862154123683	2.78302487019373e-40	9.9731382905132e-38	gained-close
Peak_9145	chr10	79877160	79878338	1179	79879667	79883174	upstream	1328	19152	Prtn3	79878338	1022.63940132981	-1.97468237802975	0.14961907247033	-13.1980658977908	9.00166544416293e-40	3.08554913409593e-37	gained-close
Peak_9145	chr10	79877160	79878338	1179	79860475	79874634	upstream	2525	216152	Plppr3	79878338	1022.63940132981	-1.97468237802975	0.14961907247033	-13.1980658977908	9.00166544416293e-40	3.08554913409593e-37	gained-close
Peak_35095	chr16	16864909	16865724	816	16860671	16863985	upstream	923	16136	Igll1	16865724	361.998575545452	-2.86613711320652	0.21763759790334	-13.1693105456874	1.31795703934018e-39	4.48513106704378e-37	gained-close
Peak_17442	chr11	115190377	115190842	466	115182832	115187316	upstream	3060	66176	Nat9	115190842	341.547540395257	2.17198440666843	0.166177404152884	13.0702752142535	4.8689056029368e-39	1.6162374858647e-36	gained-open
Peak_23060	chr13	23308685	23309531	847	23313525	23385799	upstream	3993	75887	4930586N03Rik	23309531	207.77307557593	-2.51112285621006	0.192376328416821	-13.0531800709348	6.09491721779348e-39	2.0091140707546e-36	gained-close
Peak_90325	chr9	72661819	72662821	1003	72662347	72749848	overlapStart	0	17999	Nedd4	72662821	327.721037386551	-2.12640345347633	0.163115603256223	-13.036174412672	7.61848294305454e-39	2.47681854745917e-36	gained-close
Peak_64530	chr4	135120279	135120664	386	135120645	135177990	overlapStart	0	12399	Runx3	135120664	181.972760289419	-2.54989015641922	0.19677395294513	-12.9584740167834	2.10391277388042e-38	6.76246254443888e-36	gained-close
Peak_18820	chr12	24706806	24707099	294	24708254	24714146	upstream	1154	20135	Rrm2	24707099	240.171997462502	-2.33757808452353	0.181072803153807	-12.909603451259	3.97342004162465e-38	1.25303125485981e-35	gained-close
Peak_16599	chr11	101626910	101628640	1731	101627949	101636081	overlapStart	0	66599	Rdm1	101628640	3322.41270271091	-1.78743239799399	0.139727255744472	-12.7922958800736	1.81045252993409e-37	5.45476662569888e-35	gained-close
Peak_29909	chr14	80000147	80001309	1163	80000302	80021930	overlapStart	0	380924	Olfm4	80001309	273.619849035164	2.92638365340361	0.229158778810406	12.7701136678894	2.4080255441128e-37	7.23217982940749e-35	gained-open
Peak_23061	chr13	23317314	23317751	438	23276204	23313407	upstream	3906	75322	4930557F10Rik	23317751	102.254714144971	-3.66875975727251	0.289848922000636	-12.657489743103	1.01699518226894e-36	2.97875684872245e-34	gained-close
Peak_58053	chr3	90694853	90696028	1176	90692630	90695721	overlapStart	0	20202	S100a9	90696028	538.160013230512	2.55888510002301	0.202313020605745	12.6481483611952	1.14542589876534e-36	3.3445729190924e-34	gained-open
Peak_68647	chr5	100572144	100572530	387	100553733	100572205	overlapStart	0	231507	Plac8	100572530	117.435330592392	-3.15295021537704	0.249905224135147	-12.6165838520924	1.71083112580167e-36	4.93460028925588e-34	gained-close
Peak_47596	chr19	53391832	53392118	287	53379214	53390573	upstream	1258	76479	Smndc1	53392118	177.548525987525	-3.15538761495521	0.250243868581904	-12.6092504597069	1.87770275514505e-36	5.38308929858341e-34	gained-close
Peak_51739	chr2	93027164	93027600	437	93029348	93033445	upstream	1747	433456	4631405J19Rik	93027600	121.231782465184	-2.9160761485318	0.231616470024692	-12.5901070343613	2.3934860317358e-36	6.7999441296816e-34	gained-close
Peak_58044	chr3	90668708	90670114	1407	90669071	90670034	includeFeature	0	20201	S100a8	90670114	1171.67767715995	1.86908485045441	0.149075976136389	12.5378005155196	4.6368703927963e-36	1.25695060281056e-33	gained-open
Peak_76012	chr6	127789748	127790753	1006	127788084	127788143	upstream	1604	102466996	Mir7233	127790753	435.001343067543	-1.88424947289333	0.150439884345803	-12.5249330062112	5.45373817503799e-36	1.46996112190212e-33	gained-close
Peak_20364	chr12	80441374	80441488	115	80335847	80436601	upstream	4772	320808	Dcaf5	80441488	511.390777170964	-2.34267159679856	0.187475664784742	-12.4958703279617	7.86310335843777e-36	2.1014032664643e-33	gained-close
Peak_86914	chr8	123569125	123569562	438	123538784	123566087	upstream	3037	100861480	Gm25018	123569562	231.708726579929	-2.47572409325342	0.199769212576661	-12.3929211179294	2.85452715402722e-35	7.43954258771071e-33	gained-close
Peak_54817	chr2	165234440	165235012	573	165111507	165234737	overlapStart	0	104010	Cdh22	165235012	402.682078829426	-2.14715580471251	0.173523326484884	-12.3738741540294	3.61933752893301e-35	9.33000126055141e-33	gained-close
Peak_23070	chr13	23426984	23427193	210	23418361	23423866	upstream	3117	30946	Abt1	23427193	233.362917081773	-2.45466918418571	0.19925063682165	-12.3195048374319	7.11296852912609e-35	1.76621916185434e-32	gained-close
Peak_64617	chr4	135942089	135942497	409	135946453	135962617	upstream	3955	15356	Hmgcl	135942497	139.954967564812	2.87546992420803	0.235610324059986	12.2043460348365	2.94666465499421e-34	6.96930390875955e-32	gained-open
Peak_14376	chr11	71289401	71289829	429	71242430	71285232	upstream	4168	627984	Nlrp1c-ps	71289829	129.977269828579	3.0493250547279	0.250210492314119	12.1870391066563	3.64422787528779e-34	8.55498318534682e-32	gained-open
Peak_58997	chr3	108020254	108020738	485	108012250	108017973	upstream	2280	14862	Gstm1	108020738	276.767593683703	-2.27924284289872	0.188119979970846	-12.1158998807673	8.70039385315812e-34	1.97388359921313e-31	gained-close
Peak_91892	chr9	114367952	114368664	713	114341111	114364627	upstream	3324	75100	4930525D18Rik	114368664	203.407816650478	-2.50140048066355	0.206800825360252	-12.0956987299545	1.11291306841258e-33	2.51284615155705e-31	gained-close
Peak_91892	chr9	114367952	114368664	713	114368324	114377238	overlapStart	0	75116	4930520O04Rik	114368664	203.407816650478	-2.50140048066355	0.206800825360252	-12.0956987299545	1.11291306841258e-33	2.51284615155705e-31	gained-close
Peak_58200	chr3	95360348	95360758	411	95323525	95357202	upstream	3145	84505	Setdb1	95360758	97.9093168928506	-3.21349941067293	0.266753075717757	-12.0467192441036	2.01824082343425e-33	4.46116101265936e-31	gained-close
Peak_41686	chr17	83997724	83998343	620	83998552	84013408	upstream	208	78148	8430430B14Rik	83998343	1549.04719754124	-2.39056170395479	0.199210955469752	-12.0001517904359	3.54645414452918e-33	7.73077974187391e-31	gained-close
Peak_78430	chr7	43944617	43945393	777	43945012	43945927	overlapStart	0	16604	Klk1b7-ps	43945393	96.1017460524732	4.52793639623378	0.378613577801407	11.9592551923978	5.80805193433658e-33	1.23477878943786e-30	gained-open
Peak_10693	chr10	117281520	117282422	903	117277541	117282272	overlapStart	0	17105	Lyz2	117282422	800.07868563456	2.18527497356606	0.184308179705735	11.8566358642088	1.98803316898698e-32	4.09760056612598e-30	gained-open
Peak_40838	chr17	56219745	56220368	624	56186682	56218889	upstream	855	224897	Dpp9	56220368	368.86585656892	-1.84602932052464	0.156176556184995	-11.8201435965714	3.07159054319295e-32	6.30349012861849e-30	gained-close
Peak_50809	chr2	69719196	69719715	520	69722819	69754059	upstream	3103	228005	Ppig	69719715	210.437214279402	2.26074875297473	0.192379025904547	11.751534463515	6.93479922386685e-32	1.37541638443008e-29	gained-open
Peak_54492	chr2	158305996	158306979	984	158306493	158332852	overlapStart	0	16803	Lbp	158306979	598.427197323153	-1.75027268985402	0.149274892759128	-11.7251646107579	9.47167379369502e-32	1.85523223794267e-29	gained-close
Peak_52870	chr2	127335800	127336822	1023	127336159	127338377	overlapStart	0	13537	Dusp2	127336822	830.4228083409	-1.56666402733635	0.134664529294893	-11.6338284145011	2.77372426492341e-31	5.23774366880927e-29	gained-close
Peak_52870	chr2	127335800	127336822	1023	127338639	127357655	upstream	1816	215095	Astl	127336822	830.4228083409	-1.56666402733635	0.134664529294893	-11.6338284145011	2.77372426492341e-31	5.23774366880927e-29	gained-close
Peak_77578	chr7	24776736	24777552	817	24777204	24784656	overlapStart	0	26366	Ceacam10	24777552	243.309362451473	2.82977149487589	0.245122578489614	11.544311879845	7.88701400718013e-31	1.42125494697768e-28	gained-open
Peak_29693	chr14	76673645	76674405	761	76677568	76687108	upstream	3162	73272	1700108F19Rik	76674405	295.042412374036	-1.85472306326402	0.161135619821021	-11.5103232005694	1.17038944836329e-30	2.08131323593717e-28	gained-close
Peak_23029	chr13	21944681	21945571	891	21945094	21960485	overlapStart	0	193452	Zfp184	21945571	326.16029438973	-1.92955187121941	0.168101821132051	-11.4784709542419	1.69247099979154e-30	2.95966564521771e-28	gained-close
Peak_60822	chr4	19922273	19922702	430	19876838	19922566	overlapStart	0	242341	Atp6v0d2	19922702	121.706679246445	2.84553624461144	0.249514113042049	11.4043098000308	3.97920762765924e-30	6.80753918304395e-28	gained-open
Peak_91379	chr9	106365409	106365602	194	106368632	106375724	upstream	3029	235584	Dusp7	106365602	106.189369636475	-3.00596835131354	0.264052467045794	-11.3839813160777	5.02520400298497e-30	8.51997222054473e-28	gained-close
Peak_42957	chr18	36196677	36197760	1084	36017649	36197160	overlapStart	0	100042150	Nrg2	36197760	456.991202796475	-1.80271999151022	0.159511594102718	-11.3014981867045	1.28998251033272e-29	2.12984442185929e-27	gained-close
Peak_33647	chr15	89478131	89478842	712	89472476	89477424	upstream	706	11883	Arsa	89478842	402.694842770217	-2.47116910253438	0.218923057801253	-11.2878429862688	1.50689372272509e-29	2.47502061687726e-27	gained-close
Peak_73122	chr6	51270575	51271448	874	51269812	51269910	upstream	664	387166	Mir148a	51271448	532.312383675194	-1.78238887243348	0.158363228511598	-11.2550677905821	2.18657913962821e-29	3.53009396047213e-27	gained-close
Peak_33396	chr15	84321654	84321891	238	84324720	84342978	upstream	2828	64099	Parvg	84321891	104.861387106502	-3.05511650249836	0.272871530632408	-11.196171676165	4.25736368435751e-29	6.76927981045927e-27	gained-close
Peak_36347	chr16	36183610	36184860	1251	36184212	36188111	overlapStart	0	433016	Gm5483	36184860	422.138519552762	2.11248488879747	0.188764492355064	11.191113659363	4.50736476056631e-29	7.15377150818098e-27	gained-open
Peak_23082	chr13	23466992	23467347	356	23456992	23465901	upstream	1090	12231	Btn1a1	23467347	288.13184838096	-1.7864258419907	0.160707065316843	-11.116037981707	1.04824448468373e-28	1.62841079996698e-26	gained-close
Peak_26049	chr13	100493303	100493802	500	100460230	100492609	upstream	693	23894	Gtf2h2	100493802	332.434794549849	-1.69671849850121	0.153328555878074	-11.0659002087676	1.83609908377732e-28	2.79719790531139e-26	gained-close
Peak_3628	chr1	133033333	133034409	1077	132986105	133030587	upstream	2745	17248	Mdm4	133034409	647.574074563788	-1.57368053854503	0.142415695549716	-11.0499094391999	2.19436129016849e-28	3.32159590748288e-26	gained-close
Peak_86913	chr8	123567323	123567899	577	123538784	123566087	upstream	1235	100861480	Gm25018	123567899	267.276421459946	-2.14277329454337	0.193980847156248	-11.0463137261042	2.28402032960847e-28	3.45178957352937e-26	gained-close
Peak_91703	chr9	110419589	110420791	1203	110419808	110423012	overlapStart	0	18054	Ngp	110420791	291.490232916174	2.18678900476145	0.198012698556262	11.0436806361695	2.35197241799626e-28	3.54881503312526e-26	gained-open
Peak_86912	chr8	123565794	123566200	407	123538784	123566087	overlapStart	0	100861480	Gm25018	123566200	174.865525527968	-2.23638526783721	0.20251198932384	-11.043224034805	2.36395828255779e-28	3.56122033884813e-26	gained-close
Peak_90617	chr9	83806078	83806361	284	83778692	83806305	overlapStart	0	83603	Elovl4	83806361	164.890954325952	-2.2985989297685	0.208244398315775	-11.0379868479486	2.50584509570429e-28	3.76896631358028e-26	gained-close
Peak_82465	chr7	142373639	142374948	1310	142326110	142373578	upstream	60	320802	Ifitm10	142374948	236.782232590363	2.48847414708119	0.225849515555102	11.018284192308	3.11948504599915e-28	4.64759058679992e-26	gained-open
Peak_9149	chr10	79884321	79884793	473	79886312	79888216	upstream	1518	50701	Elane	79884793	145.905683584718	-2.37431592594429	0.215855598901874	-10.9995568242065	3.84014518702013e-28	5.64131639073332e-26	gained-close
Peak_18454	chr12	8770962	8772262	1301	8771396	8793688	overlapStart	0	20969	Sdc1	8772262	514.278040462688	-1.90962227559884	0.173731277906458	-10.9918162037986	4.18420360575926e-28	6.12772084096689e-26	gained-close
Peak_28274	chr14	51926433	51927121	689	51922160	51922773	upstream	3659	497071	Rnase13	51927121	122.254458435487	-2.59852088240137	0.236756237234001	-10.9755118292115	5.01211977590576e-28	7.30626507733961e-26	gained-close
Peak_5260	chr1	171917396	171917981	586	171917537	171953167	overlapStart	0	30925	Slamf6	171917981	106.00603902385	2.78988240263375	0.254332706932933	10.9694204739834	5.36149262871131e-28	7.77959158944574e-26	gained-open
Peak_45997	chr19	20390153	20390879	727	20373434	20390671	overlapStart	0	16952	Anxa1	20390879	453.350714624978	1.75813148401417	0.161502476878485	10.8860961020245	1.34273462986959e-27	1.9131137408651e-25	gained-open
Peak_89067	chr9	55283552	55284128	577	55220222	55283625	overlapStart	0	83961	Nrg4	55284128	486.06249213735	-1.64382726221226	0.151319011275579	-10.863322779836	1.72361135433116e-27	2.43016357358948e-25	gained-close
Peak_77253	chr7	16781065	16781748	684	16781346	16798274	overlapStart	0	20514	Slc1a5	16781748	763.14873113895	-1.60775573034762	0.148506467988388	-10.8261663759543	2.58763338700568e-27	3.58952557494222e-25	gained-close
Peak_7822	chr10	43217280	43217758	479	43221486	43464882	upstream	3727	71365	Pdss2	43217758	118.968512315168	-2.50376823055999	0.23161676308313	-10.8099612361017	3.08800529062604e-27	4.25245747489035e-25	gained-close
Peak_49365	chr2	30061782	30062143	362	30061996	30072577	overlapStart	0	56086	Set	30062143	137.721339623236	-2.41851469112184	0.223810272651874	-10.8060933149558	3.22096800531762e-27	4.42268358651784e-25	gained-close
Peak_9695	chr10	85386597	85387617	1021	85386814	85660292	overlapStart	0	74007	Btbd11	85387617	334.044046235105	-1.63206049805794	0.152352473283246	-10.7123991024661	8.90243647523232e-27	1.17958530136671e-24	gained-close
Peak_44960	chr19	4061150	4061893	744	4057487	4059431	upstream	1718	225884	Gstp3	4061893	235.933722785843	-1.82883955018267	0.171961893624313	-10.6351442848039	2.04511950159728e-26	2.61814040010977e-24	gained-close
Peak_61114	chr4	40914434	40915259	826	40920056	40931395	upstream	4796	20731	Spink4	40915259	157.214762081465	-2.19277899131697	0.206549219699808	-10.6162540555897	2.50409082023561e-26	3.17563024315295e-24	gained-close
Peak_78582	chr7	45204346	45204923	578	45183676	45204892	overlapStart	0	384619	Ccdc155	45204923	223.557389270503	-1.92614477553105	0.181611443223953	-10.6058557838552	2.79889758948488e-26	3.52586558389889e-24	gained-close
Peak_12766	chr11	48823618	48824127	510	48826138	48850195	upstream	2010	94089	Trim7	48824127	300.274683840127	-1.70880222467207	0.161257452525744	-10.5967333472496	3.08570787515545e-26	3.8665758839332e-24	gained-close
Peak_52322	chr2	118111150	118113412	2263	118111876	118127133	overlapStart	0	21825	Thbs1	118113412	1712.89924948854	1.59282248185603	0.150719839159918	10.5681009927698	4.18890753358752e-26	5.18711761940551e-24	gained-open
Peak_52322	chr2	118111150	118113412	2263	117857291	118111202	overlapStart	0	329496	Gm13986	118113412	1712.89924948854	1.59282248185603	0.150719839159918	10.5681009927698	4.18890753358752e-26	5.18711761940551e-24	gained-open
Peak_36199	chr16	33793949	33794398	450	33794037	33819927	overlapStart	0	17063	Muc13	33794398	60.3438107841607	-3.86977768266586	0.368087275376513	-10.5132068983028	7.50956612424215e-26	9.05031863375864e-24	gained-close
Peak_72294	chr6	29523324	29524711	1388	29526625	29541869	upstream	1913	27056	Irf5	29524711	488.691168711428	1.55755799505196	0.148195111929073	10.5101846800278	7.7541552204292e-26	9.33320112956647e-24	gained-open
Peak_64383	chr4	134097014	134097593	580	134093538	134095073	upstream	1940	23833	Cd52	134097593	291.654440441071	1.78186844289107	0.169631244320719	10.5043646294436	8.2476311519234e-26	9.9019719893257e-24	gained-open
Peak_64383	chr4	134097014	134097593	580	134102583	134126780	upstream	4989	67586	Ubxn11	134097593	291.654440441071	1.78186844289107	0.169631244320719	10.5043646294436	8.2476311519234e-26	9.9019719893257e-24	gained-open
Peak_10453	chr10	107946449	107946690	242	107946645	107977832	overlapStart	0	628877	Gm29685	107946690	76.3739488263947	-3.08784739167006	0.294029016033966	-10.5018458154938	8.47073301257419e-26	1.01440780681974e-23	gained-close
Peak_21532	chr12	105012984	105013543	560	104929933	105009809	upstream	3174	212073	Syne3	105013543	512.013478828177	-1.50707510552522	0.144611166665613	-10.4215679900437	1.97667145208778e-25	2.30585671265372e-23	gained-close
Peak_29857	chr14	79200033	79200652	620	79178893	79199190	upstream	842	100043765	Gm4632	79200652	58.9332005462553	-3.87659883206245	0.372495398344778	-10.4071052938869	2.3011245987254e-25	2.67649792616249e-23	gained-close
Peak_38643	chr17	23548706	23549134	429	23550799	23565294	upstream	1664	320020	6330415G19Rik	23549134	458.234064900184	-1.54554219083949	0.148509405285797	-10.4070323887244	2.30288703876738e-25	2.67649792616249e-23	gained-close
Peak_92904	chrX	20658121	20658694	574	20658302	20683179	overlapStart	0	22201	Uba1	20658694	314.784281333241	-1.65446843061959	0.159654853085769	-10.3627819552142	3.66154674152485e-25	4.20393557073665e-23	gained-close
Peak_55211	chr2	168154284	168154852	569	168145120	168154513	overlapStart	0	77017	E130018N17Rik	168154852	239.705718987607	-1.81652320188741	0.175389799088741	-10.3570630180625	3.8871474992279e-25	4.45214862363141e-23	gained-close
Peak_90043	chr9	67838821	67839766	946	67840396	67995634	upstream	629	320528	Vps13c	67839766	449.080940829126	-1.60147939253881	0.155332198851567	-10.31002847046	6.34825122742403e-25	7.10748704877725e-23	gained-close
Peak_17753	chr11	117825381	117826027	647	117815519	117826014	overlapStart	0	21877	Tk1	117826027	244.81097066118	-1.95671719643012	0.18982923524063	-10.3077757962295	6.49879361521007e-25	7.2674334368861e-23	gained-close
Peak_16556	chr11	101175863	101176008	146	101172998	101175443	upstream	419	12777	Ccr10	101176008	92.1459493702299	-2.72515867311626	0.264541994011946	-10.3014218339686	6.94274414368345e-25	7.7364576261168e-23	gained-close
Peak_16556	chr11	101175863	101176008	146	101176117	101190720	upstream	108	53321	Cntnap1	101176008	92.1459493702299	-2.72515867311626	0.264541994011946	-10.3014218339686	6.94274414368345e-25	7.7364576261168e-23	gained-close
Peak_78436	chr7	43995577	43996828	1252	43995877	43999875	overlapStart	0	16613	Klk1b11	43996828	202.853721879613	1.97162221993413	0.191687625854691	10.2855998718912	8.18309134090197e-25	9.03348354022604e-23	gained-open
Peak_91691	chr9	110281250	110281368	119	110281287	110281409	overlapStart	0	102465959	Mir6236	110281368	10370.8192986846	-3.38751275874885	0.330785106754866	-10.2408261120995	1.30120522805715e-24	1.41822375352045e-22	gained-close
Peak_61608	chr4	52916556	52917350	795	52910833	52911792	upstream	4763	258836	Olfr272	52917350	174.16801947367	-1.94753153375183	0.190363822027125	-10.2305759204306	1.44656529320848e-24	1.56762607250036e-22	gained-close
Peak_58866	chr3	106166766	106167623	858	106147554	106167564	overlapStart	0	12655	Chil3	106167623	87.5978064387975	3.80524348904408	0.372045475477803	10.227898845315	1.48710808211946e-24	1.60971793154455e-22	gained-open
Peak_44959	chr19	4059282	4059756	475	4057487	4059431	overlapStart	0	225884	Gstp3	4059756	58.9454367236054	-3.84292939529286	0.377126188171641	-10.1900358973316	2.19683078298999e-24	2.33520643882641e-22	gained-close
Peak_90199	chr9	71164983	71165661	679	71168776	71208122	upstream	3114	102635087	Gm32511	71165661	341.143686333169	-1.60123760578427	0.15768547775061	-10.1546295107577	3.16008123494559e-24	3.32550217256132e-22	gained-close
Peak_90199	chr9	71164983	71165661	679	71110659	71163289	upstream	1693	64008	Aqp9	71165661	341.143686333169	-1.60123760578427	0.15768547775061	-10.1546295107577	3.16008123494559e-24	3.32550217256132e-22	gained-close
Peak_87815	chr9	22214657	22215125	469	22206786	22213860	upstream	796	69862	1810064F22Rik	22215125	136.721761321919	-2.13603108542619	0.210799809075704	-10.1329839661244	3.94425555864809e-24	4.12320708708797e-22	gained-close
Peak_40611	chr17	48145877	48146660	784	48125605	48146307	overlapStart	0	328829	9830107B12Rik	48146660	176.241974221752	2.30893973769871	0.228343674955083	10.1116868603998	4.90326570827775e-24	5.09756434722335e-22	gained-open
Peak_72943	chr6	48589272	48589632	361	48589445	48590584	overlapStart	0	330305	Gm5111	48589632	76.5551315295443	-3.38188088614049	0.334548660444635	-10.1087862125819	5.05061104314735e-24	5.23923364416665e-22	gained-close
Peak_72943	chr6	48589272	48589632	361	48593883	48599082	upstream	4250	58887	Repin1	48589632	76.5551315295443	-3.38188088614049	0.334548660444635	-10.1087862125819	5.05061104314735e-24	5.23923364416665e-22	gained-close
Peak_58362	chr3	96453452	96453617	166	96433788	96452306	upstream	1145	329716	BC107364	96453617	86.206653729028	-2.54774451538784	0.253640001466789	-10.0447267806905	9.69158747982577e-24	9.78529695962003e-22	gained-close
Peak_32766	chr15	78119798	78120164	367	77993623	78119280	upstream	517	12300	Cacng2	78120164	134.985053897523	-2.28760147225232	0.22832468015926	-10.0190722731186	1.25677060233084e-23	1.25287712965344e-21	gained-close
Peak_17534	chr11	115929705	115930097	393	115933659	115965534	upstream	3561	57230	Sap30bp	115930097	81.7312081294577	3.36969248432904	0.336978641809228	9.99972124713085	1.52826637217052e-23	1.51079590810412e-21	gained-open
Peak_28456	chr14	55716958	55717178	221	55700009	55713492	upstream	3465	21816	Tgm1	55717178	89.0856530154013	-2.64434292580097	0.266036522809873	-9.93977405008705	2.79460294924268e-23	2.70333544597191e-21	gained-close
Peak_56567	chr3	37729206	37729576	371	37714190	37724360	upstream	4845	381438	Gm5148	37729576	133.628482233846	-2.17129656293425	0.218628727537836	-9.93143301608651	3.03856860050942e-23	2.92736070284923e-21	gained-close
Peak_15570	chr11	86811947	86812208	262	86768849	86807660	upstream	4286	67487	Dhx40	86812208	176.750126174506	-2.07646134180938	0.20941259348655	-9.91564694003345	3.55942956481505e-23	3.41871465389739e-21	gained-close
Peak_7132	chr10	21160642	21161452	811	21124930	21160984	overlapStart	0	17863	Myb	21161452	301.177195732105	-1.55404566153001	0.156933932712185	-9.9025471080248	4.05805645790689e-23	3.88186541210049e-21	gained-close
Peak_75426	chr6	118141005	118141286	282	118107452	118139140	upstream	1864	78752	Csgalnact2	118141286	129.195381743628	2.13443773083107	0.217284556457686	9.82323716709584	8.94248408191251e-23	8.34332001038871e-21	gained-open
Peak_75725	chr6	123049766	123050398	633	123049962	123071555	overlapStart	0	69810	Clec4b1	123050398	69.8470694389537	3.24874603338708	0.33187447586099	9.78908072083211	1.25431058125306e-22	1.14763352853024e-20	gained-open
Peak_63842	chr4	128654523	128654944	422	128654702	128752881	overlapStart	0	54383	Phc2	128654944	82.248264696476	-2.69443687015756	0.275320938621314	-9.78653088882418	1.28633704701782e-22	1.17353136615398e-20	gained-close
Peak_59335	chr3	121426080	121427448	1369	121426541	121458205	overlapStart	0	71994	Cnn3	121427448	327.126965036949	-1.6985607581624	0.173571226711842	-9.78595813568976	1.29364154760294e-22	1.17905830686439e-20	gained-close
Peak_58363	chr3	96457039	96457174	136	96433788	96452306	upstream	4732	329716	BC107364	96457174	78.6113238732842	-2.59203236373943	0.265677738587884	-9.75630241930117	1.73360935633936e-22	1.56348757641412e-20	gained-close
Peak_34000	chr15	98778476	98779419	944	98771752	98778150	upstream	325	22410	Wnt10b	98779419	121.626550762664	-2.56828537641001	0.263349798296323	-9.75237267324638	1.80206360334436e-22	1.62213158190292e-20	gained-close
Peak_43322	chr18	46745706	46746122	417	46732417	46741579	upstream	4126	67526	Atg12	46746122	710.034042595718	-1.5131320641996	0.155742967850794	-9.71557229889967	2.58791106638544e-22	2.28814873220991e-20	gained-close
Peak_78914	chr7	52005498	52006513	1016	51997161	52006018	overlapStart	0	75744	Svip	52006513	952.6808346218	-1.57453892522044	0.162108352190646	-9.71287971250687	2.65721610900088e-22	2.34086627550172e-20	gained-close
Peak_36306	chr16	35772714	35772921	208	35694903	35769356	upstream	3357	224132	Dirc2	35772921	150.267686328939	-2.07641652423272	0.21383942351695	-9.71016705003479	2.7288950307284e-22	2.39934798584657e-20	gained-close
Peak_23069	chr13	23426498	23426720	223	23418361	23423866	upstream	2631	30946	Abt1	23426720	170.802873884254	-1.82758229928325	0.188298749677257	-9.70575907920644	2.84947307384011e-22	2.50071660133318e-20	gained-close
Peak_63027	chr4	109481426	109481775	350	109452857	109476983	upstream	4442	29864	Rnf11	109481775	145.092556293136	-2.14788162667916	0.221347122340538	-9.70367992123561	2.90816312217587e-22	2.54749704015343e-20	gained-close
Peak_71818	chr6	4749078	4749461	384	4674350	4747204	upstream	1873	20392	Sgce	4749461	107.198471293614	-2.42717688817793	0.251233380556057	-9.66104457459371	4.41340562676438e-22	3.79576957023337e-20	gained-close
Peak_85150	chr8	84837246	84837428	183	84815405	84832265	upstream	4980	23863	Dand5	84837428	97.287646264934	-2.81840423146329	0.292091883627703	-9.64903302501754	4.96214113245857e-22	4.22926417997635e-20	gained-close
Peak_8341	chr10	61474247	61474665	419	61475833	61582242	upstream	1167	216011	Lrrc20	61474665	482.210001307012	-1.5613131642678	0.16225433603174	-9.62262829119326	6.41701502707886e-22	5.41559432338825e-20	gained-close
Peak_35229	chr16	18169106	18169459	354	18165089	18165170	upstream	3935	102465189	Mir6366	18169459	51.2866050328299	-3.73169607720164	0.388545004334983	-9.6042827357635	7.66900083072065e-22	6.42633740116172e-20	gained-close
Peak_11078	chr10	127521876	127522539	664	127517123	127522444	overlapStart	0	108037	Shmt2	127522539	280.12675294596	-1.58704868540515	0.165349292962096	-9.59815828041651	8.1385605105139e-22	6.79573394225664e-20	gained-close
Peak_45681	chr19	11640596	11641148	553	11629499	11640851	overlapStart	0	170813	Ms4a3	11641148	293.560732114266	-2.11632524244173	0.220779390862577	-9.58570106645065	9.18318369632902e-22	7.62091470855178e-20	gained-close
Peak_84570	chr8	70905766	70906612	847	70905974	70917529	overlapStart	0	270058	Map1s	70906612	304.913377995155	-1.53018469192061	0.159730883798836	-9.57976726559476	9.72638602107187e-22	8.06463169070574e-20	gained-close
Peak_15335	chr11	83658795	83659162	368	83662584	83664683	upstream	3421	20303	Ccl4	83659162	219.44766516798	-1.80264219647044	0.188512016055818	-9.56247900895971	1.14969212997158e-21	9.49107972496431e-20	gained-close
Peak_71556	chr5	147426514	147426694	181	147430580	147548501	upstream	3885	72587	Pan3	147426694	114.027430988069	-2.48979541534312	0.260378239308752	-9.56222540698095	1.15251348341469e-21	9.5060759033941e-20	gained-close
Peak_79064	chr7	65802861	65803278	418	65804052	65806223	upstream	773	100503969	1810008I18Rik	65803278	203.862355828808	-2.02163585956199	0.211526079961024	-9.55738346748778	1.20771380719925e-21	9.91813996908785e-20	gained-close
Peak_40614	chr17	48166836	48167596	761	48151708	48167257	overlapStart	0	328830	A530064D06Rik	48167596	224.373453620816	1.66728617026041	0.175120784933381	9.52077830678224	1.71886826300692e-21	1.3780953465257e-19	gained-open
Peak_91783	chr9	111058980	111059665	686	111054834	111057518	upstream	1461	54199	Ccrl2	111059665	353.66170712461	1.51078167258872	0.158804153018795	9.51348969072564	1.84371511214298e-21	1.47071257925294e-19	gained-open
Peak_58361	chr3	96452123	96452625	503	96433788	96452306	overlapStart	0	329716	BC107364	96452625	310.530289540061	-1.56863365151049	0.164915936247168	-9.51171661882024	1.87541811851073e-21	1.4922271364157e-19	gained-close
Peak_1399	chr1	59162859	59163424	566	59120935	59163389	overlapStart	0	227157	Mpp4	59163424	100.447938935314	-2.35408222078147	0.248915606632708	-9.45735083720595	3.15843576888912e-21	2.44723156717055e-19	gained-close
Peak_80647	chr7	104169745	104170240	496	104153013	104164816	upstream	4928	244180	Olfm5	104170240	58.5841202849439	-3.07344536468903	0.325491055903517	-9.44248792384657	3.64031288873357e-21	2.79088688129277e-19	gained-close
Peak_59603	chr3	129532101	129532754	654	129532386	129638495	overlapStart	0	170439	Elovl6	129532754	250.25419735036	-1.57875297181809	0.167341331992416	-9.4343277480882	3.93509440104786e-21	3.01200275813538e-19	gained-close
Peak_41573	chr17	80891464	80892015	552	80896793	80933447	upstream	4777	320784	C230072F16Rik	80892015	86.6614198599422	-2.43421709934157	0.258320645587413	-9.42323867999883	4.37384417194483e-21	3.3103352138481e-19	gained-close
Peak_15672	chr11	88046584	88046781	198	88047373	88053757	upstream	591	110809	Srsf1	88046781	124.304241900905	-2.00395202987774	0.213189786502717	-9.39985007139259	5.46408751580427e-21	4.09291736753903e-19	gained-close
Peak_16224	chr11	97769718	97769973	256	97745470	97766613	upstream	3104	67480	Cwc25	97769973	67.2756520108775	-2.83413755405557	0.301645409419349	-9.39559318840995	5.68963096264142e-21	4.25176324527373e-19	gained-close
Peak_74402	chr6	89286652	89287202	551	89269511	89285725	upstream	926	75131	4930512J16Rik	89287202	74.2721598190818	2.78112884041113	0.296322284397894	9.38548663682919	6.26265666541275e-21	4.66156488188858e-19	gained-open
Peak_23487	chr13	33484519	33485021	503	33484790	33496002	overlapStart	0	93806	Serpinb9g	33485021	178.29033284523	-1.75305846457479	0.188004391617935	-9.32456124821479	1.11443715792318e-20	8.06304175148478e-19	gained-close
Peak_53831	chr2	150567006	150567727	722	150570415	150578944	upstream	2687	13011	Cst7	150567727	118.542989176625	-2.0603157248007	0.22104622193227	-9.32074616245643	1.15524971057511e-20	8.34301939837164e-19	gained-close
Peak_9024	chr10	78013170	78013438	269	77986947	78009796	upstream	3373	18641	Pfkl	78013438	261.121849996505	-1.64721015233652	0.17678319046608	-9.31768539754113	1.18905838797041e-20	8.56755962317811e-19	gained-close
Peak_75944	chr6	125685117	125685847	731	125690419	126040133	upstream	4571	243634	Ano2	125685847	99.4084156432414	2.45941747992009	0.264004280533379	9.31582425463415	1.21009266635888e-20	8.71248301320762e-19	gained-open
Peak_15258	chr11	83116596	83117287	692	83116845	83122659	overlapStart	0	20555	Slfn1	83117287	341.067945888735	2.07431764375564	0.222712117285736	9.31389665293484	1.23226594138596e-20	8.86538035367e-19	gained-open
Peak_75742	chr6	123259834	123260637	804	123262107	123275268	upstream	1469	17474	Clec4d	123260637	450.328850156572	1.51731455950015	0.164301055690228	9.23496536967409	2.58369577935985e-20	1.80260415119556e-18	gained-open
Peak_76144	chr6	129472547	129473089	543	129461591	129472779	overlapStart	0	56644	Clec7a	129473089	130.212456243367	2.0440539259427	0.221703741855458	9.21975384283471	2.97783037200109e-20	2.06995312397895e-18	gained-open
Peak_28501	chr14	56085104	56085460	357	56082401	56082468	upstream	2635	102465572	Mir6949	56085460	56.5834326902692	-3.3917487219412	0.36915860933188	-9.18778171821522	4.01025663134862e-20	2.74724358338427e-18	gained-close
Peak_28501	chr14	56085104	56085460	357	56082163	56085197	overlapStart	0	17231	Mcpt8	56085460	56.5834326902692	-3.3917487219412	0.36915860933188	-9.18778171821522	4.01025663134862e-20	2.74724358338427e-18	gained-close
Peak_49762	chr2	33435844	33436722	879	33406108	33431324	upstream	4519	241311	Zbtb34	33436722	132.357229811258	2.0373064295189	0.221764767599287	9.1867903615788	4.04737532070993e-20	2.76866225300856e-18	gained-open
Peak_39643	chr17	32617095	32617710	616	32621319	32636184	upstream	3608	677156	Cyp4f37	32617710	131.093352471407	1.97853121321972	0.216438728934709	9.14129935505476	6.17064006136185e-20	4.12856841333238e-18	gained-open
Peak_76804	chr6	149138813	149139322	510	149141513	149151171	upstream	2190	320204	Etfbkmt	149139322	162.656353261221	1.96334420201597	0.215075745257572	9.12861745365426	6.93796189258899e-20	4.6093597107463e-18	gained-open
Peak_11101	chr10	127640033	127640252	220	127642986	127660987	upstream	2733	20852	Stat6	127640252	112.094044402253	-2.18283661423681	0.239461843222404	-9.11559263414453	7.82416669413283e-20	5.16547881552778e-18	gained-close
Peak_80348	chr7	99833007	99834164	1158	99811439	99828417	upstream	4589	50877	Neu3	99834164	128.037204411776	2.03050043803265	0.222788257227069	9.11403708303681	7.93721596199509e-20	5.23645922803701e-18	gained-open
Peak_29077	chr14	65968241	65968835	595	65968483	65981548	overlapStart	0	12759	Clu	65968835	203.526841722268	-1.83755451195547	0.202156059388014	-9.08978201058278	9.9237822858608e-20	6.4882470417149e-18	gained-close
Peak_68998	chr5	107708109	107708676	568	107698212	107703480	upstream	4628	654809	4930428O21Rik	107708676	145.114152784194	2.02784820236602	0.223295675924176	9.08144859488731	1.07139278340635e-19	6.95677320981064e-18	gained-open
Peak_42243	chr18	7629192	7629656	465	7347962	7626863	upstream	2328	75739	Mpp7	7629656	110.035368615923	2.50031190103119	0.27630344684771	9.04915204481426	1.44082836086944e-19	9.19667144144053e-18	gained-open
Peak_45915	chr19	16955668	16956142	475	16956118	17223932	overlapStart	0	353211	Prune2	16956142	54.2682577994755	-3.31746521925168	0.366795726092491	-9.04444894871853	1.504219325863e-19	9.55088413037552e-18	gained-close
Peak_47731	chr19	55311885	55312257	373	55316057	55627461	upstream	3799	53611	Vti1a	55312257	137.192862893219	1.94769682011199	0.216239945859785	9.00710926636526	2.11559254668778e-19	1.3107252683166e-17	gained-open
Peak_91776	chr9	111018995	111019907	913	111019292	111042766	overlapStart	0	17002	Ltf	111019907	358.84710383452	4.4847132296286	0.500527509508613	8.95997351680314	3.24756398141019e-19	1.95072405095424e-17	gained-open
Peak_77904	chr7	28538959	28539304	346	28540885	28542210	upstream	1580	68416	Sycn	28539304	93.1348328914241	-2.25944975180866	0.252981327765761	-8.93129058876912	4.21067476992742e-19	2.50223051057634e-17	gained-close
Peak_79504	chr7	79935457	79936052	596	79925359	79935264	upstream	192	70420	Arpin	79936052	177.844357437133	1.67575831419622	0.188492902910187	8.89029925436867	6.09445474756982e-19	3.55689072084263e-17	gained-open
Peak_69441	chr5	114851808	114852149	342	114851948	114852064	includeFeature	0	102466620	Mir6240	114852149	87.6356453424347	-2.40503761620501	0.270533152861057	-8.88999219049582	6.11132042675567e-19	3.56453502030609e-17	gained-close
Peak_69441	chr5	114851808	114852149	342	114853714	114883880	upstream	1564	67593	4930519G04Rik	114852149	87.6356453424347	-2.40503761620501	0.270533152861057	-8.88999219049582	6.11132042675567e-19	3.56453502030609e-17	gained-close
Peak_18559	chr12	12942246	12942844	599	12936093	12941836	upstream	409	18109	Mycn	12942844	140.747862794844	-1.99847255602725	0.224839239042426	-8.8884509863074	6.19667098273667e-19	3.61209029570416e-17	gained-close
Peak_21474	chr12	103992287	103993410	1124	103980243	103989957	upstream	2329	380780	Serpina11	103993410	179.975940783106	1.69830258043476	0.191111706235899	8.88643931805236	6.30984903394449e-19	3.67353586280217e-17	gained-open
Peak_50350	chr2	51438987	51439690	704	51421050	51437900	upstream	1086	73375	1700057H21Rik	51439690	245.338913631939	-1.61186013412155	0.181929465710382	-8.85980799112285	8.01523696536267e-19	4.63219003265181e-17	gained-close
Peak_12783	chr11	48979027	48980321	1295	48946150	48979381	overlapStart	0	667214	9930111J21Rik1	48980321	230.66554874833	1.5598172511327	0.176395462027838	8.84272890697454	9.34086717936605e-19	5.36878542145264e-17	gained-open
Peak_58515	chr3	98339395	98340106	712	98313171	98339969	overlapStart	0	236539	Phgdh	98340106	199.329316597345	-1.6541929963181	0.187581253020327	-8.8185411371511	1.15960602788717e-18	6.53788366354552e-17	gained-close
Peak_80860	chr7	110619316	110619893	578	110308013	110614920	upstream	4395	319934	Sbf2	110619893	197.574193295275	-1.58700772277085	0.180291835042701	-8.80243812702321	1.33875370944198e-18	7.48989553137009e-17	gained-close
Peak_27750	chr14	33216285	33217136	852	33216823	33369936	overlapStart	0	239027	Arhgap22	33217136	220.636570502066	1.67536702079302	0.190671126648308	8.78668443535879	1.54038693090388e-18	8.55724286465603e-17	gained-open
Peak_84398	chr8	69822425	69823150	726	69822565	69831102	overlapStart	0	53978	Lpar2	69823150	168.58988821246	-1.67061808657879	0.191123527657914	-8.74103835907101	2.30977570334e-18	1.26311352711089e-16	gained-close
Peak_82955	chr8	11475852	11476183	332	11477929	11480241	upstream	1745	102132	E230013L22Rik	11476183	87.8443415194767	2.27142113168314	0.2601500647088	8.73119572053793	2.5199417016009e-18	1.36933718909623e-16	gained-open
Peak_68833	chr5	104982461	104982943	483	104935057	104982717	overlapStart	0	27405	Abcg3	104982943	89.1009532767924	-2.34135672216292	0.268174647186746	-8.73071614608108	2.53065075152128e-18	1.37357857141952e-16	gained-close
Peak_86828	chr8	123044072	123044512	441	122883822	123042284	upstream	1787	77087	Ankrd11	123044512	166.298552272167	1.75697944927456	0.201335355092174	8.72663148740164	2.62370265711417e-18	1.42001151933034e-16	gained-open
Peak_10695	chr10	117285624	117285820	197	117277541	117282272	upstream	3351	17105	Lyz2	117285820	83.1518141717697	2.30890801902274	0.264962892500938	8.71408066702987	2.93127606890492e-18	1.5801498790588e-16	gained-open
Peak_70543	chr5	135250778	135251552	775	135248938	135251047	overlapStart	0	14371	Fzd9	135251552	218.998392187268	-1.7026623580021	0.195562569165376	-8.70648389039244	3.13446488787939e-18	1.68583959740033e-16	gained-close
Peak_32998	chr15	79834033	79834663	631	79823898	79834333	overlapStart	0	494448	Cbx6	79834663	148.200967401615	-1.70021566030821	0.195372566999573	-8.70242780969309	3.24858287784978e-18	1.74523243464995e-16	gained-close
Peak_32998	chr15	79834033	79834663	631	79786351	79834333	overlapStart	0	504193	Npcd	79834663	148.200967401615	-1.70021566030821	0.195372566999573	-8.70242780969309	3.24858287784978e-18	1.74523243464995e-16	gained-close
Peak_36370	chr16	36333962	36334658	697	36321665	36334332	overlapStart	0	100038854	BC117090	36334658	112.598723162271	2.62498738800418	0.301662309510846	8.70174133540471	3.26829861835158e-18	1.75482780413036e-16	gained-open
Peak_64958	chr4	140665735	140666086	352	140514485	140665905	overlapStart	0	72754	Arhgef10l	140666086	108.630654678397	-1.98338179483562	0.227954501410371	-8.70077924570163	3.29612905581358e-18	1.7687667921401e-16	gained-close
Peak_80156	chr7	98313960	98314348	389	98213660	98309527	upstream	4432	66190	Acer3	98314348	181.291888357298	1.63188184394387	0.187910761043921	8.68434481813656	3.80931605212831e-18	2.02463008105422e-16	gained-open
Peak_13544	chr11	59571091	59572369	1279	59570782	59571738	overlapStart	0	257962	Olfr222	59572369	125.104466799919	2.38901342136645	0.275362459729666	8.67588640699909	4.10341602606229e-18	2.16997080246869e-16	gained-open
Peak_69455	chr5	114974108	114974355	248	114948980	114971062	upstream	3045	21405	Hnf1a	114974355	82.0660003233531	-2.26125656277204	0.260709855704559	-8.67346022136784	4.19183621305796e-18	2.21549081995844e-16	gained-close
Peak_24633	chr13	54189961	54190185	225	54192129	54222432	upstream	1943	15466	Hrh2	54190185	1177.09423501484	-3.04529339070306	0.35164863418846	-8.66004612169486	4.71573421252221e-18	2.47991523574139e-16	gained-close
Peak_47175	chr19	44293031	44293191	161	44293676	44306864	upstream	484	20250	Scd2	44293191	133.337949570541	-2.01339144509451	0.232552324728864	-8.65779969063713	4.80957744862664e-18	2.5250548507479e-16	gained-close
Peak_75925	chr6	125532220	125532759	540	125532587	125686679	overlapStart	0	22371	Vwf	125532759	95.5987956052199	2.1333710980544	0.246496943910299	8.65475678607499	4.93963861902879e-18	2.58616187709927e-16	gained-open
Peak_3513	chr1	131638133	131639152	1020	131638314	131675507	overlapStart	0	13034	Ctse	131639152	164.178628687986	1.68183413208535	0.194718604965503	8.63725442354781	5.75800564429951e-18	2.98816172235107e-16	gained-open
Peak_9552	chr10	83337084	83338130	1047	83231139	83337817	overlapStart	0	338365	Slc41a2	83338130	281.361383588587	1.50763398789558	0.174560403485499	8.63674669508214	5.78364281529211e-18	2.99982079047985e-16	gained-open
Peak_38570	chr17	17882560	17883114	555	17887824	17971677	upstream	4709	14289	Fpr2	17883114	103.832308879607	2.62329816866495	0.304684032697691	8.60989709712751	7.31261874064041e-18	3.75172238924635e-16	gained-open
Peak_33489	chr15	85735070	85735801	732	85735564	85806851	overlapStart	0	19013	Ppara	85735801	114.269599660542	-2.13203406958396	0.247900379020719	-8.60036631652654	7.9462058897062e-18	4.04824315778969e-16	gained-close
Peak_38372	chr17	12921073	12921534	462	12922857	12922917	upstream	1322	100303746	Snora20	12921534	128.159673616115	1.96677856941413	0.229427768077435	8.57253934820268	1.01227750244e-17	5.0778115268207e-16	gained-open
Peak_38372	chr17	12921073	12921534	462	12911355	12916091	upstream	4981	67681	Mrpl18	12921534	128.159673616115	1.96677856941413	0.229427768077435	8.57253934820268	1.01227750244e-17	5.0778115268207e-16	gained-open
Peak_71800	chr6	4000770	4001172	403	4003987	4008445	upstream	2814	66066	Gng11	4001172	184.96595893553	-1.60872716037604	0.187811438867674	-8.5656505805778	1.07467320404968e-17	5.37654855326936e-16	gained-close
Peak_2221	chr1	85608128	85608802	675	85576899	85603891	upstream	4236	109032	Sp110	85608802	230.995879203455	1.56136311957969	0.182440994669032	8.5581813583738	1.14661890198649e-17	5.71834622252685e-16	gained-open
Peak_93658	chrX	100729573	100730195	623	100729847	100738901	overlapStart	0	71584	Gdpd2	100730195	86.7592645037849	-2.11207509066054	0.24693884932555	-8.55302880218776	1.19899963778502e-17	5.95759242291437e-16	gained-close
Peak_81814	chr7	128209764	128210235	472	128205435	128206366	upstream	3397	12862	Cox6a2	128210235	86.2605363350057	2.18755179810886	0.255796774992186	8.5519131278167	1.21064884590913e-17	6.00601178374827e-16	gained-open
Peak_82487	chr7	142497612	142498359	748	142498836	142516009	upstream	476	21957	Tnnt3	142498359	133.289538498108	1.90134576068291	0.222390101945722	8.54959705511967	1.2351896689558e-17	6.11813370791795e-16	gained-open
Peak_49470	chr2	30969106	30969311	206	30960561	30967918	upstream	1187	30931	Tor1a	30969311	69.2893125908073	2.5579359062198	0.299334771633676	8.54540183306934	1.28089801775953e-17	6.33127679561954e-16	gained-open
Peak_24839	chr13	56549423	56549839	417	56542460	56548538	upstream	884	16841	Lect2	56549839	181.097907747339	-1.57997254707005	0.184929835084025	-8.54363248824709	1.30067239830186e-17	6.42566124875958e-16	gained-close
Peak_35309	chr16	19884235	19884447	213	19876567	19884274	overlapStart	0	68162	A930003A15Rik	19884447	37.7136223887786	-3.76046519591508	0.440459731867062	-8.53759134796469	1.37048618018277e-17	6.75996952879932e-16	gained-close
Peak_35828	chr16	27374082	27374719	638	27353322	27370239	upstream	3842	224065	Uts2b	27374719	114.759126328778	2.11429878725795	0.247829425599868	8.53126614057357	1.44754590783591e-17	7.11196428312303e-16	gained-open
Peak_52871	chr2	127337707	127337897	191	127338639	127357655	upstream	741	215095	Astl	127337897	79.7895739617552	-2.22133922819338	0.260867191506297	-8.51521118990449	1.66286975495304e-17	8.13010108718799e-16	gained-close
Peak_90524	chr9	78191801	78192031	231	78191966	78209349	overlapStart	0	14860	Gsta4	78192031	52.2370136927733	-2.79094443859493	0.328065210158205	-8.50728560108229	1.78052564697275e-17	8.67843427910893e-16	gained-close
Peak_22603	chr13	12340732	12340970	239	12269426	12340732	overlapStart	0	11472	Actn2	12340970	38.2433255329871	-3.62993570788605	0.427100675795956	-8.49901654011951	1.91203661532913e-17	9.2907106332731e-16	gained-close
Peak_83693	chr8	33730647	33731004	358	33731914	33777173	upstream	909	68153	Gtf2e2	33731004	201.658172915075	-1.50659062138805	0.177459957990438	-8.48974967901899	2.07082657507144e-17	1.00211058292179e-15	gained-close
Peak_24724	chr13	55398051	55398456	406	55399648	55414695	upstream	1191	20505	Slc34a1	55398456	79.1325341636062	-2.57011809856156	0.302762453729701	-8.48889308069918	2.08614540032091e-17	1.00849193532325e-15	gained-close
Peak_23498	chr13	33658523	33659067	545	33661405	33671585	upstream	2337	238568	Serpinb6d	33659067	62.3710194044904	-2.49981971048627	0.294606796920893	-8.48527507380463	2.1520902772195e-17	1.03719130293748e-15	gained-close
Peak_1131	chr1	53848237	53848525	289	53849424	53849495	upstream	898	102465783	Mir7681	53848525	60.5975138049266	2.7629716259409	0.3256293542194	8.48502013144457	2.15681388422103e-17	1.03893856583816e-15	gained-open
Peak_35124	chr16	17144420	17144581	162	17144621	17160701	upstream	39	69101	Ydjc	17144581	77.4751395734954	-2.23306591788139	0.263482688769752	-8.47519026129563	2.34695649308759e-17	1.12537337042597e-15	gained-close
Peak_16232	chr11	97797060	97797277	218	97799672	97838764	upstream	2394	16796	Lasp1	97797277	179.862029807608	-1.58487192775023	0.187504176651916	-8.45246199871266	2.85223406000217e-17	1.35054282022305e-15	gained-close
Peak_9312	chr10	80921967	80922380	414	80901363	80918245	upstream	3721	16907	Lmnb2	80922380	53.7776177229589	-3.1644227908913	0.375490100336619	-8.42744665719407	3.53289241178662e-17	1.65954726668066e-15	gained-close
Peak_5368	chr1	173741454	173742575	1122	173723427	173741809	overlapStart	0	226691	Ifi207	173742575	188.139207899097	1.68573168577072	0.200159093884133	8.42195901799266	3.7024058530599e-17	1.73364288495467e-15	gained-open
Peak_34592	chr16	4639811	4640007	197	4639945	4651166	overlapStart	0	246154	Vasn	4640007	72.9224618371791	-2.26447497478524	0.268897376535183	-8.42133532116835	3.72217247886226e-17	1.7406814114446e-15	gained-close
Peak_44504	chr18	80046704	80047386	683	80046895	80119640	overlapStart	0	93737	Pard6g	80047386	96.4121189355766	-2.06668534905126	0.245619449253175	-8.41417630132784	3.95665265184651e-17	1.84395606295858e-15	gained-close
Peak_83881	chr8	36251544	36251920	377	36216064	36249516	upstream	2027	244421	Lonrf1	36251920	116.339597448142	1.88116460260467	0.223937770753823	8.40038996669593	4.44998348356514e-17	2.06370165414786e-15	gained-open
Peak_26168	chr13	102689519	102690351	833	102693558	102706631	upstream	3206	17079	Cd180	102690351	168.162277231181	1.73050316649464	0.206132068444538	8.39511862250706	4.6542412010323e-17	2.15525767530525e-15	gained-open
Peak_88867	chr9	50739192	50739645	454	50662752	50739447	overlapStart	0	330938	Dixdc1	50739645	127.828943677227	-1.79659734436425	0.214353053931202	-8.38148704399086	5.22631560110744e-17	2.40253067909801e-15	gained-close
Peak_4852	chr1	164149196	164149527	332	164151835	164220277	upstream	2307	14067	F5	164149527	91.808177835707	-2.02347753357707	0.241574345046272	-8.37621036782482	5.46591756950593e-17	2.50658554328976e-15	gained-close
Peak_20990	chr12	88274312	88274599	288	88270635	88274497	overlapStart	0	435337	Gm5662	88274599	67.561236592946	-2.36900694252321	0.282921233556514	-8.37337980166129	5.59887894848702e-17	2.56507284164921e-15	gained-close
Peak_64013	chr4	130177082	130177551	470	130164454	130175122	upstream	1959	94242	Tinagl1	130177551	59.635913292747	-2.83139300786649	0.338772269715317	-8.35780629343073	6.38952468513489e-17	2.90618929020131e-15	gained-close
Peak_26753	chr13	118661735	118661984	250	118603410	118658743	upstream	2991	100038690	Gm10732	118661984	105.790301017119	-1.96612590553054	0.235386407645983	-8.35275887504755	6.66866976355784e-17	3.02588091919018e-15	gained-close
Peak_27681	chr14	32321710	32322221	512	32322019	32347820	overlapStart	0	239017	Ogdhl	32322221	185.638951558618	-1.5678108229569	0.188124956501824	-8.33388005563049	7.82351853560035e-17	3.52453235513813e-15	gained-close
Peak_52721	chr2	125245634	125246121	488	125247248	125259049	upstream	1126	110074	Dut	125246121	160.718624699439	-1.74172505666138	0.209132017360957	-8.32835200769477	8.19754625905235e-17	3.68251216231674e-15	gained-close
Peak_27794	chr14	34343079	34343507	429	34345055	34345686	upstream	1547	100041231	Gm3219	34343507	106.842793138044	2.01046353348994	0.241940112413574	8.30975696189328	9.58982786493559e-17	4.26943649407104e-15	gained-open
Peak_86779	chr8	122699303	122699544	242	122625136	122699109	upstream	193	12398	Cbfa2t3	122699544	98.7226672721409	-1.96287586810726	0.236279246579168	-8.30744086298574	9.77880891683262e-17	4.34743419354261e-15	gained-close
Peak_50576	chr2	60283781	60284830	1050	60251993	60284484	overlapStart	0	66205	Cd302	60284830	251.881580857376	1.56070815311559	0.187898326911174	8.30613118685928	9.88729185745519e-17	4.39153583787045e-15	gained-open
Peak_47184	chr19	44328008	44328329	322	44333326	44346743	upstream	4996	329065	Scd4	44328329	46.042846821852	-3.26637565862572	0.393429404327452	-8.30231706806315	1.02100285818728e-16	4.51462154969507e-15	gained-close
Peak_61962	chr4	62282975	62283715	741	62286429	62298412	upstream	2713	20530	Slc31a2	62283715	207.205972840384	1.58977622196297	0.191655704196115	8.29495907064785	1.08622598621396e-16	4.78414784226061e-15	gained-open
Peak_47655	chr19	53888451	53888990	540	53892231	53929861	upstream	3240	18569	Pdcd4	53888990	138.569069164036	-1.86310378853908	0.224680388582108	-8.29224036996099	1.11135057320045e-16	4.89025266642798e-15	gained-close
Peak_75924	chr6	125527594	125528043	450	125532587	125686679	upstream	4543	22371	Vwf	125528043	63.1873842721109	2.50857578776723	0.303232594239749	8.27277751607348	1.30873779096805e-16	5.70310674584629e-15	gained-open
Peak_84567	chr8	70893411	70893876	466	70882889	70892757	upstream	653	114479	Slc5a5	70893876	145.727297174384	-1.79307503897037	0.216857684313259	-8.26844132661772	1.35721669803032e-16	5.90348703144168e-15	gained-close
Peak_71256	chr5	142896022	142896603	582	142871789	142895238	upstream	783	231863	Fbxl18	142896603	163.677800149093	2.18503756899588	0.264715973535291	8.25427170039883	1.52831317963419e-16	6.6142541936172e-15	gained-open
Peak_22200	chr12	116485468	116486031	564	116485720	117278167	overlapStart	0	19276	Ptprn2	116486031	161.184469949747	-1.71595451828751	0.207988703861319	-8.25022939434085	1.58090768252039e-16	6.82625979975009e-15	gained-close
Peak_182	chr1	13593211	13593662	452	13564693	13589910	upstream	3300	72265	Tram1	13593662	197.713148555564	-1.60525621900195	0.194702861338195	-8.24464626749194	1.65649517143903e-16	7.10731538103954e-15	gained-close
Peak_78067	chr7	30238193	30238806	614	30233297	30236765	upstream	1427	381867	Ovol3	30238806	61.9382263480092	-2.60510104596376	0.316068279203506	-8.24220972926682	1.69058886360373e-16	7.23709728642963e-15	gained-close
Peak_87919	chr9	26922898	26923463	566	26879567	26923081	overlapStart	0	382064	Gm1110	26923463	35.6387046921199	-3.66799350405198	0.445598653489543	-8.2316081418277	1.84716658413459e-16	7.86113548621849e-15	gained-close
Peak_9303	chr10	80848337	80849265	929	80832801	80844039	upstream	4297	237403	Lingo3	80849265	150.281523892467	-1.68226022866577	0.204420506805846	-8.229410321654	1.88137283838606e-16	7.99591908123771e-15	gained-close
Peak_52492	chr2	119549122	119549651	530	119519404	119547627	upstream	1494	241624	Exd1	119549651	100.906072061674	2.11687726765908	0.257360571542795	8.22533636356598	1.94643838847139e-16	8.25326058536151e-15	gained-open
Peak_35586	chr16	23221794	23222078	285	23224740	23360350	upstream	2661	20440	St6gal1	23222078	49.2354090096651	-2.87325637787905	0.349760768588557	-8.21491898440737	2.1230754497458e-16	8.96277001332669e-15	gained-close
Peak_78749	chr7	46734766	46735326	561	46727998	46732543	upstream	2222	20211	Saa4	46735326	204.914983580939	1.5640163212878	0.190731544512333	8.20009257140297	2.40201988305791e-16	1.0064016521549e-14	gained-open
Peak_45608	chr19	10832122	10832489	368	10789339	10830058	upstream	2063	12511	Cd6	10832489	71.0319617683509	2.41394871450711	0.294469086456017	8.19763033043423	2.45171935041246e-16	1.02420650443948e-14	gained-open
Peak_91907	chr9	114501125	114501490	366	114490316	114496544	upstream	4580	12773	Ccr4	114501490	98.6361667024116	-1.89113913139839	0.230733565858285	-8.19620294240119	2.4809933813203e-16	1.03353967341783e-14	gained-close
Peak_60428	chr4	3874852	3875510	659	3870658	3872105	upstream	2746	17451	Mos	3875510	209.307494262633	-1.5404924238361	0.18809262077915	-8.19007368526636	2.61066295665312e-16	1.08231542365085e-14	gained-close
Peak_64729	chr4	137468475	137468723	249	137468803	137570630	upstream	79	15530	Hspg2	137468723	54.626311617583	-2.55756132010026	0.312668738933073	-8.17977943310704	2.84363904308056e-16	1.16967528395513e-14	gained-close
Peak_21595	chr12	106007702	106007888	187	106010263	106077410	upstream	2374	22367	Vrk1	106007888	119.163570941426	-1.99869581823662	0.244964320871686	-8.15913032201761	3.37445403857779e-16	1.37191060925522e-14	gained-close
Peak_74344	chr6	88630885	88631521	637	88547722	88627448	upstream	3436	74589	Kbtbd12	88631521	133.034958405926	-1.75280713647345	0.214957617310326	-8.15419875976291	3.51502383666696e-16	1.42538510540812e-14	gained-close
Peak_17351	chr11	114726780	114727001	222	114727412	114757886	upstream	410	432611	Dnaic2	114727001	45.2970845533038	3.16748205559866	0.390884934034364	8.1033618331276	5.3460934567932e-16	2.11531793213458e-14	gained-open
Peak_49621	chr2	32393034	32393333	300	32395890	32402740	upstream	2556	96979	Ptges2	32393333	197.184286842155	1.93032188591194	0.23828275692256	8.10097176498289	5.45219047907264e-16	2.15459453827546e-14	gained-open
Peak_88613	chr9	45112788	45113380	593	45117876	45130070	upstream	4495	72821	Scn2b	45113380	168.222352594921	1.55299045066539	0.1917728358973	8.09807313636985	5.58364993971994e-16	2.20378300457716e-14	gained-open
Peak_63304	chr4	118425549	118426071	523	118428093	118432953	upstream	2021	54325	Elovl1	118426071	203.552143477532	1.60940577743233	0.198843995342108	8.09381130500507	5.78262464892949e-16	2.27851306762442e-14	gained-open
Peak_11417	chr11	4257161	4257421	261	4257568	4272514	upstream	146	16878	Lif	4257421	119.652262170442	1.85103437896699	0.228982046898407	8.08375330747324	6.28033097043369e-16	2.46027739871159e-14	gained-open
Peak_93225	chrX	56606607	56606870	264	56609835	56664230	upstream	2964	236794	Slc9a6	56606870	93.4797621834841	-2.15151832019283	0.266834971403429	-8.06310473052629	7.43807474105688e-16	2.8844943996427e-14	gained-close
Peak_39151	chr17	28080560	28080876	317	28066747	28080639	overlapStart	0	21463	Tcp11	28080876	58.6537155235632	-2.46440643847608	0.305753921943793	-8.06009755429765	7.62335864503489e-16	2.95217137933758e-14	gained-close
Peak_91659	chr9	109854184	109854748	565	109847377	109849456	upstream	4727	12796	Camp	109854748	94.672852487264	2.51738037832626	0.312398938591716	8.05822321187944	7.74113698037825e-16	2.99288109998228e-14	gained-open
Peak_87229	chr8	126845713	126845867	155	126849020	126851833	upstream	3152	414091	A630001O12Rik	126845867	71.756230404717	2.29561017606743	0.285048734612888	8.05339542792566	8.05282035298469e-16	3.10323878743165e-14	gained-open
Peak_9629	chr10	84533246	84534313	1068	84526305	84533888	overlapStart	0	216197	Ckap4	84534313	130.297804718127	1.89150906570664	0.234929367457987	8.05139470715556	8.18558196404317e-16	3.15183218270357e-14	gained-open
Peak_88133	chr9	35686836	35687639	804	35685079	35687371	overlapStart	0	100312987	Pate1	35687639	248.275607155431	1.56336750895191	0.19425212299127	8.04813602486174	8.40644881791863e-16	3.23030258679127e-14	gained-open
Peak_6486	chr10	5554958	5555306	349	5020192	5551482	upstream	3475	64009	Syne1	5555306	42.389277756628	3.36451399145486	0.420985237157317	7.99199994321316	1.32767100062779e-15	4.98039820322732e-14	gained-open
Peak_72040	chr6	16898233	16898762	530	16833381	16898441	overlapStart	0	21426	Tfec	16898762	204.047505682432	-1.5399502521734	0.192697169150769	-7.99155617573457	1.33245976650035e-15	4.99546173681885e-14	gained-close
Peak_40818	chr17	56113088	56113664	577	56100591	56109802	upstream	3285	57435	Plin4	56113664	132.201806138573	2.34055514864518	0.293020881124247	7.98767357351827	1.37508972209639e-15	5.13587596717927e-14	gained-open
Peak_58281	chr3	95985292	95985561	270	95985510	95986967	overlapStart	0	668224	Gm9054	95985561	108.602559113792	-1.74285284999066	0.218390071064836	-7.98045827583999	1.45790977769291e-15	5.42806030808402e-14	gained-close
Peak_46904	chr19	41265716	41266095	380	41210842	41264004	upstream	1711	107358	Tm9sf3	41266095	173.220384869086	1.55641800008769	0.195821338661108	7.94815320296252	1.89312447341985e-15	6.94997803385169e-14	gained-open
Peak_28260	chr14	51853575	51854049	475	51853998	51854465	overlapStart	0	53873	Ear7	51854049	106.291403314778	2.03962639819042	0.256766168896607	7.94351688524715	1.96527927802053e-15	7.20648106110117e-14	gained-open
Peak_28260	chr14	51853575	51854049	475	51853768	51854643	overlapStart	0	93719	Ear6	51854049	106.291403314778	2.03962639819042	0.256766168896607	7.94351688524715	1.96527927802053e-15	7.20648106110117e-14	gained-open
Peak_7646	chr10	40565582	40566132	551	40570362	40604132	upstream	4229	70840	Slc22a16	40566132	68.7668211023831	2.25708585557617	0.284170787003109	7.94270895815717	1.97812719670181e-15	7.25078270326118e-14	gained-open
Peak_66980	chr5	34520502	34520846	345	34525784	34563639	upstream	4937	24055	Sh3bp2	34520846	156.570387690392	-1.65713382104572	0.209475093622675	-7.91088712451274	2.5556116734218e-15	9.20000753332353e-14	gained-close
Peak_25009	chr13	62859264	62859554	291	62836885	62858370	upstream	893	14120	Fbp2	62859554	137.436824357777	-1.6861442583849	0.213334076009231	-7.90377369582506	2.70584085603932e-15	9.70757603437453e-14	gained-close
Peak_73545	chr6	66895071	66895354	284	66896397	67021361	upstream	1042	14701	Gng12	66895354	220.061797448328	-1.52105303737333	0.192446227077026	-7.9037820614926	2.70565917206051e-15	9.70757603437453e-14	gained-close
Peak_69001	chr5	107726807	107727046	240	107716655	107726247	upstream	559	14581	Gfi1	107727046	57.9353770891814	-2.524028342935	0.319822624064337	-7.89196308522331	2.97469728449613e-15	1.06157756053203e-13	gained-close
Peak_35850	chr16	29544809	29545275	467	29396038	29544864	overlapStart	0	224079	Atp13a4	29545275	265.322183707473	-1.52969811256004	0.193979062829252	-7.88589289095878	3.12294390813077e-15	1.11196549255785e-13	gained-close
Peak_80141	chr7	98119419	98119880	462	98051054	98119493	overlapStart	0	17921	Myo7a	98119880	99.4855261284095	-1.84519552270696	0.234055299676368	-7.88358787542236	3.18112268009778e-15	1.13097817464611e-13	gained-close
Peak_40615	chr17	48170235	48170798	564	48151708	48167257	upstream	2977	328830	A530064D06Rik	48170798	75.2363408263996	2.34153286476494	0.297571539125813	7.86880651168372	3.58040417869328e-15	1.26343796243736e-13	gained-open
Peak_45106	chr19	5274005	5274588	584	5133685	5273119	upstream	885	107975	Pacs1	5274588	146.84079219117	1.67688782775636	0.213927200673029	7.8385909902096	4.55630007668046e-15	1.58533771627227e-13	gained-open
Peak_58265	chr3	95888762	95888993	232	95893921	95898592	upstream	4927	226548	Aph1a	95888993	84.6435606197867	2.10390272782423	0.268842575867256	7.82577953301213	5.04520818927354e-15	1.741996226111e-13	gained-open
Peak_85056	chr8	83899534	83900195	662	83900098	83941954	overlapStart	0	330814	Adgrl1	83900195	117.702915509086	-1.64974902252524	0.21095051869207	-7.82054973248691	5.2593148594632e-15	1.81261472347678e-13	gained-close
Peak_2779	chr1	92933203	92933426	224	92934408	92947948	upstream	981	23830	Capn10	92933426	103.779117727172	-1.95858721008895	0.25071039118677	-7.81215011000431	5.62205453016746e-15	1.9272001544191e-13	gained-close
Peak_70647	chr5	136034646	136035642	997	136038496	136044993	upstream	2853	100647	Upk3b	136035642	144.223449242263	1.70669340010513	0.218622630121403	7.80657244475282	5.87641979731424e-15	2.00557204669809e-13	gained-open
Peak_20955	chr12	87857879	87858286	408	87861350	87865690	upstream	3063	100038982	Gm1995	87858286	45.5577071982756	-2.6534215115803	0.340599494576827	-7.79044465370393	6.67737848313561e-15	2.25937077530589e-13	gained-close
Peak_808	chr1	40081148	40081438	291	40084768	40125225	upstream	3329	16178	Il1r2	40081438	65.0898443949116	2.3301037752729	0.299287380686316	7.78550625799718	6.94346069549684e-15	2.34186467935178e-13	gained-open
Peak_1287	chr1	56969500	56969823	324	56971469	57042513	upstream	1645	329160	9130024F11Rik	56969823	97.3670813077099	-2.19408793879407	0.282052035780455	-7.77901826775649	7.30895085593784e-15	2.46162550614758e-13	gained-close
Peak_7287	chr10	24838192	24838549	358	24773814	24836195	upstream	1996	209558	Enpp3	24838549	107.14399639233	-1.94456680237645	0.250274164565977	-7.76974645284982	7.86433862210247e-15	2.63928208472021e-13	gained-close
Peak_5236	chr1	171642343	171642775	433	171641840	171641900	upstream	442	102465784	Mir7683	171642775	44.0031922482814	3.24738251900532	0.418013035166912	7.76861543972819	7.93486703982812e-15	2.66200720273042e-13	gained-open
Peak_7243	chr10	23851231	23851788	558	23851462	23869843	overlapStart	0	26464	Vnn3	23851788	117.538487802817	1.77232621897844	0.229613302344478	7.71874364804656	1.17481913843693e-14	3.83258411761946e-13	gained-open
Peak_46292	chr19	29042339	29043083	745	29047483	29048729	upstream	4399	67329	1700018L02Rik	29043083	236.207281607009	-1.53118248126928	0.19865901477041	-7.70759123636481	1.28214641575287e-14	4.15691377000397e-13	gained-close
Peak_43268	chr18	46047521	46047770	250	45683487	46045260	upstream	2260	107003	A330093E20Rik	46047770	37.9235522641303	-2.91550266066709	0.379945435589892	-7.67347726165091	1.67395218101867e-14	5.32859757864914e-13	gained-close
Peak_8391	chr10	62231019	62231636	618	62185396	62231218	overlapStart	0	70423	Tspan15	62231636	152.870139359967	-1.50154562582601	0.195735828504861	-7.67128653601971	1.70279676794651e-14	5.4131314189633e-13	gained-close
Peak_17849	chr11	118420337	118420543	207	118406289	118419118	upstream	1218	76025	Cant1	118420543	79.2800243669657	-2.0893382526728	0.272443483898228	-7.66888685601038	1.73495389995869e-14	5.50795465300307e-13	gained-close
Peak_50064	chr2	38508989	38509369	381	38511697	38587490	upstream	2327	59126	Nek6	38509369	90.5481079304981	1.87646094714397	0.244725833019978	7.66760469864571	1.75237969109688e-14	5.55954503876295e-13	gained-open
Peak_62844	chr4	107094489	107094867	379	107096891	107107748	upstream	2023	242603	Cdcp2	107094867	84.6427773105362	-1.84049152677649	0.240046268188863	-7.6672365734444	1.7574146154047e-14	5.57364958447794e-13	gained-close
Peak_30563	chr15	6441640	6442289	650	6445333	6498476	upstream	3043	12279	C9	6442289	92.8910977029139	1.88742347042447	0.24662126385748	7.65312544791434	1.96152387137208e-14	6.18573091250091e-13	gained-open
Peak_76484	chr6	142391075	142391427	353	142350342	142387087	upstream	3987	19691	Recql	142391427	45.6494040545593	3.12906215975197	0.410652523439243	7.61973196595959	2.54203006679603e-14	7.87721246312823e-13	gained-open
Peak_75737	chr6	123229383	123230179	797	123229843	123247024	overlapStart	0	56620	Clec4n	123230179	144.198348859811	1.70481169573201	0.22375600518527	7.61906566181508	2.5551846841019e-14	7.91199883010144e-13	gained-open
Peak_52520	chr2	119872416	119873474	1059	119872551	119969581	overlapStart	0	29808	Mga	119873474	113.085115652414	-1.92730866547556	0.253099652848052	-7.61482144992357	2.64056233129682e-14	8.16115778878364e-13	gained-close
Peak_73092	chr6	50655638	50656226	589	50650871	50654393	upstream	1244	60531	Npvf	50656226	88.0597179098679	-1.83129242468559	0.240768129033257	-7.60604168017866	2.82618178594995e-14	8.67814845964236e-13	gained-close
Peak_29111	chr14	66339761	66340112	352	66344296	66361680	upstream	4183	56471	Stmn4	66340112	55.0134947483874	2.50226199025199	0.329421882602893	7.59591916141281	3.05615277690188e-14	9.33883687375903e-13	gained-open
Peak_61362	chr4	45413721	45414241	521	45395923	45408766	upstream	4954	230125	Slc25a51	45414241	142.672948923426	-1.50972610082482	0.198848396049402	-7.59234739036941	3.14161389647301e-14	9.56599691952769e-13	gained-close
Peak_57847	chr3	89159918	89160292	375	89164795	89182770	upstream	4502	105943584	Gm45927	89160292	139.439490490215	-1.62663639268644	0.214330208681049	-7.58939396689097	3.21405158305034e-14	9.77398148717648e-13	gained-close
Peak_57847	chr3	89159918	89160292	375	89164795	89177087	upstream	4502	12748	Clk2	89160292	139.439490490215	-1.62663639268644	0.214330208681049	-7.58939396689097	3.21405158305034e-14	9.77398148717648e-13	gained-close
Peak_57847	chr3	89159918	89160292	375	89146775	89160157	overlapStart	0	15168	Hcn3	89160292	139.439490490215	-1.62663639268644	0.214330208681049	-7.58939396689097	3.21405158305034e-14	9.77398148717648e-13	gained-close
Peak_89241	chr9	57585013	57585307	295	57589452	57596233	upstream	4144	71742	Ulk3	57585307	65.6894029493522	2.20332941134793	0.290632014229834	7.58116554085303	3.42464297339602e-14	1.03776993318739e-12	gained-open
Peak_64727	chr4	137433071	137433522	452	137421008	137430520	upstream	2550	67868	Cela3b	137433522	84.2488364037159	-1.87266713582149	0.247109875541655	-7.57827720044244	3.50173606154532e-14	1.05943473565256e-12	gained-close
Peak_10447	chr10	107912974	107913349	376	107762310	107912134	upstream	839	628870	Otogl	107913349	77.7536103433184	-1.93702079311951	0.255614610405321	-7.57789544990415	3.51205226893186e-14	1.06221616673455e-12	gained-close
Peak_74240	chr6	87728192	87728443	252	87730869	87755912	upstream	2425	58229	Efcc1	87728443	30.7927880685639	-3.4438329391945	0.455420609234919	-7.5618732867183	3.97305335039244e-14	1.19098442733595e-12	gained-close
Peak_20938	chr12	87477202	87477341	140	87449910	87472299	upstream	4902	66354	Snw1	87477341	31.1223650266759	-3.39214149157159	0.448755231461268	-7.55900155308689	4.06175053577451e-14	1.21603155439077e-12	gained-close
Peak_64054	chr4	130787541	130787981	441	130792537	130826318	upstream	4555	20970	Sdc3	130787981	99.1707425563019	1.99580951582377	0.264240997612064	7.55298963393202	4.25378862655954e-14	1.26990825750802e-12	gained-open
Peak_54625	chr2	162987004	162987657	654	162987481	163014139	overlapStart	0	27219	Sgk2	162987657	131.244486194076	-1.77220710580492	0.235734958988771	-7.51779504154637	5.57077410894075e-14	1.63571897998277e-12	gained-close
Peak_77434	chr7	19693406	19694301	896	19689480	19692659	upstream	746	11812	Apoc1	19694301	160.133691924969	-1.62397632144506	0.216782922597771	-7.49125577782831	6.8217725490934e-14	1.9724346386905e-12	gained-close
Peak_45156	chr19	5611441	5611608	168	5603014	5610094	upstream	1346	81601	Kat5	5611608	47.0162768913287	2.82087351260612	0.376684340440088	7.48869334284094	6.95626573560891e-14	2.00672733076234e-12	gained-open
Peak_37478	chr16	91461284	91462152	869	91465104	91470123	upstream	2951	100503120	A930006K02Rik	91462152	165.691746628124	1.54565981943563	0.206539369801672	7.48360867431638	7.23090559069167e-14	2.07992415418965e-12	gained-open
Peak_71300	chr5	143316802	143317200	399	143301072	143315360	upstream	1441	231868	E130309D02Rik	143317200	82.3200092358458	1.90148591932733	0.25428073044127	7.47790017760118	7.55195238859572e-14	2.16634326159942e-12	gained-open
Peak_79960	chr7	90024395	90024851	457	90029159	90049071	upstream	4307	319711	E230029C05Rik	90024851	87.8561865959677	2.22989200355438	0.298586779851379	7.46815383006676	8.13277379589792e-14	2.31959360185324e-12	gained-open
Peak_77320	chr7	18925154	18925457	304	18925888	18965319	upstream	430	384569	Nova2	18925457	57.1054151466659	-2.31219701771716	0.310236806101229	-7.45300677496888	9.12365963529224e-14	2.58661355545837e-12	gained-close
Peak_35732	chr16	25057959	25058381	423	25059639	25069058	upstream	1257	319487	A230028O05Rik	25058381	149.424301784926	1.56468150526957	0.210134739852815	7.44608676492771	9.61495836929936e-14	2.71775545708376e-12	gained-open
Peak_1819	chr1	74151243	74151369	127	74153994	74161246	upstream	2624	12765	Cxcr2	74151369	38.7832794864787	-2.98316450547469	0.401627344979809	-7.42769271754807	1.10508309411876e-13	3.08490679262907e-12	gained-close
Peak_21742	chr12	110837549	110837891	343	110841029	110843804	upstream	3137	66709	4921507G05Rik	110837891	146.374474248559	-1.57631023719428	0.21234302782926	-7.42341414883544	1.14139162763651e-13	3.1787605629726e-12	gained-close
Peak_72784	chr6	40588429	40588790	362	40574898	40585805	upstream	2623	23845	Clec5a	40588790	108.486137955886	-2.27808744127594	0.307717813320916	-7.40317051096468	1.32970830001068e-13	3.66118694501777e-12	gained-close
Peak_82695	chr7	145284426	145284585	160	145183010	145284011	upstream	414	233979	Tpcn2	145284585	104.217776555251	1.74074789419354	0.235328471168797	7.39709855568192	1.39192245608683e-13	3.82025575516538e-12	gained-open
Peak_3151	chr1	118627689	118628165	477	118627945	118685168	overlapStart	0	81879	Tfcp2l1	118628165	57.857041158987	-2.2067261929007	0.299583741064047	-7.36597448534077	1.75857457477924e-13	4.75755522509479e-12	gained-close
Peak_93515	chrX	78583414	78584072	659	78449610	78583897	overlapStart	0	546336	Prrg1	78584072	136.120456813541	-1.51826799865991	0.206243183731221	-7.36154267594381	1.81796874868103e-13	4.90981305845612e-12	gained-close
Peak_72942	chr6	48588512	48588738	227	48589445	48590584	upstream	706	330305	Gm5111	48588738	36.7060882773221	-2.77106890956669	0.377418760801234	-7.34215994902823	2.10174003213165e-13	5.62322447624002e-12	gained-close
Peak_73529	chr6	65585484	65585763	280	65590398	65634040	upstream	4634	414084	Tnip3	65585763	56.1937219443089	2.34464598117786	0.320288861422065	7.32041061549179	2.47213333776791e-13	6.52927544815386e-12	gained-open
Peak_17408	chr11	115048234	115048909	676	115020689	115048295	overlapStart	0	100043123	Cd300ld4	115048909	99.8513188553361	1.81495163885301	0.247956952885877	7.31962390136464	2.48666891926838e-13	6.56400110982991e-12	gained-open
Peak_17408	chr11	115048234	115048909	676	115042131	115048295	overlapStart	0	382551	Cd300ld3	115048909	99.8513188553361	1.81495163885301	0.247956952885877	7.31962390136464	2.48666891926838e-13	6.56400110982991e-12	gained-open
Peak_24289	chr13	48515905	48516244	340	48487659	48513436	upstream	2468	67911	Zfp169	48516244	47.1044686054186	2.57516601270138	0.351944565513953	7.31696484342869	2.5364226763598e-13	6.68787078371503e-12	gained-open
Peak_29637	chr14	76013411	76013970	560	75896937	76010865	upstream	2545	68705	Gtf2f2	76013970	81.0424353785111	1.96915305013045	0.269552627331103	7.30526379812155	2.7672329252724e-13	7.23595461935657e-12	gained-open
Peak_80992	chr7	113372813	113372945	133	113315644	113369339	upstream	3473	68815	Btbd10	113372945	56.2046976462125	2.53462515336741	0.347022348953212	7.30392483657917	2.79492549238785e-13	7.30432931306203e-12	gained-open
Peak_20993	chr12	88290221	88290472	252	88282867	88287070	upstream	3150	633093	Gm7104	88290472	41.8270452317778	-2.78925080081121	0.383655226199829	-7.27020149950575	3.58951660001131e-13	9.22046721315965e-12	gained-close
Peak_51529	chr2	90583639	90583967	329	90429756	90580647	upstream	2991	19271	Ptprj	90583967	77.6250451873549	1.95308031895965	0.268801476115777	7.2658839050364	3.70606785812943e-13	9.49922123506347e-12	gained-open
Peak_82287	chr7	140132013	140132655	643	140137564	140150786	upstream	4908	212508	Mtg1	140132655	153.31703033264	-1.53163642618678	0.210980958742384	-7.25959553561881	3.88249496460978e-13	9.91115268812394e-12	gained-close
Peak_91194	chr9	102714902	102715089	188	102716802	102733417	upstream	1712	56332	Amotl2	102715089	79.2111835756327	-1.99763120861242	0.275209232055097	-7.25859083176575	3.91143693864751e-13	9.97964948807138e-12	gained-close
Peak_45690	chr19	11766200	11766875	676	11770415	11774956	upstream	3539	94063	Mrpl16	11766875	114.935543811724	1.82569214266594	0.251797968004735	7.25062301786173	4.14858881692738e-13	1.05335854432161e-11	gained-open
Peak_8243	chr10	60273483	60274253	771	60277628	60302600	upstream	3374	19156	Psap	60274253	157.335945154798	1.69693862581594	0.234245456106999	7.24427553053925	4.34756793813115e-13	1.10210614242989e-11	gained-open
Peak_58212	chr3	95497392	95497952	561	95499210	95509387	upstream	1257	13038	Ctsk	95497952	79.9226636715592	1.952605523394	0.269633871081102	7.24169228281668	4.4312034859739e-13	1.12240545379932e-11	gained-open
Peak_88968	chr9	53705796	53706651	856	53684110	53706232	overlapStart	0	270160	Rab39	53706651	223.482806328366	-1.79696303329481	0.248619668707972	-7.22775894052662	4.91029300969319e-13	1.22960079532831e-11	gained-close
Peak_48966	chr2	25575510	25575661	152	25573431	25574871	upstream	638	75454	Phpt1	25575661	91.3211842855333	-1.76918155886748	0.24495920109397	-7.22235193030694	5.10960283096209e-13	1.27579594992346e-11	gained-close
Peak_25792	chr13	95376873	95377153	281	95350683	95375357	upstream	1515	66549	Aggf1	95377153	87.4859893030109	-1.92856166021213	0.267388127878297	-7.21259270377901	5.48964317917108e-13	1.36348958416555e-11	gained-close
Peak_88870	chr9	50773836	50774425	590	50775225	50843639	upstream	799	102580	Alg9	50774425	155.65121074398	1.57768223394445	0.219065796806252	7.20186472258743	5.9394605560076e-13	1.46521148725334e-11	gained-open
Peak_78435	chr7	43994533	43995224	692	43995877	43999875	upstream	652	16613	Klk1b11	43995224	113.68042469611	1.72374419053529	0.239444119832417	7.19894141372821	6.06818151266148e-13	1.49423836592101e-11	gained-open
Peak_93584	chrX	94541930	94542388	459	94535474	94542074	overlapStart	0	94275	Maged1	94542388	83.8733293923728	-1.80513086460778	0.251004647637604	-7.19162326911969	6.40254911393457e-13	1.56881523303003e-11	gained-close
Peak_30221	chr14	118241543	118241697	155	118233233	118237030	upstream	4512	223227	Sox21	118241697	41.2380937624947	-2.48467637511209	0.345638880894696	-7.18864836236142	6.54358575517958e-13	1.60171403351752e-11	gained-close
Peak_85472	chr8	94150885	94151361	477	94152607	94154148	upstream	1245	17751	Mt3	94151361	90.7988675116264	-1.75368615839374	0.244608462819581	-7.16936012016571	7.53491120453235e-13	1.82640996519597e-11	gained-close
Peak_80016	chr7	92878700	92878861	162	92857526	92874232	upstream	4467	74041	Ddias	92878861	92.8132226496664	1.77125488380376	0.24741291719405	7.15910431796306	8.12058757769288e-13	1.95684235449621e-11	gained-open
Peak_61872	chr4	59256000	59256287	288	59260051	59269144	upstream	3763	101055769	Gm12596	59256287	70.0105883662448	-1.87636312258275	0.262667883530853	-7.14348133224422	9.09962852288923e-13	2.1755861916514e-11	gained-close
Peak_29908	chr14	79994919	79995583	665	80000302	80021930	upstream	4718	380924	Olfm4	79995583	112.647437205141	2.07325229827905	0.290450991576764	7.13804517252305	9.46675241608394e-13	2.25620144083659e-11	gained-open
Peak_73894	chr6	82940833	82941283	451	82911885	82939769	upstream	1063	20355	Sema4f	82941283	89.953586429081	1.98464692917318	0.27803580719603	7.13809832333537	9.46309352970879e-13	2.25620144083659e-11	gained-open
Peak_68595	chr5	99983630	99984122	493	99955935	99978938	upstream	4691	11991	Hnrnpd	99984122	90.8106390562753	1.73425912342237	0.243265704557852	7.12907364634269	1.01046661351232e-12	2.39349535397963e-11	gained-open
Peak_92592	chrX	7638468	7638826	359	7638580	7653256	overlapStart	0	20977	Syp	7638826	255.084895429008	-1.6745898526603	0.235657267606913	-7.10603950247607	1.19420246968249e-12	2.80066234126876e-11	gained-close
Peak_17749	chr11	117807664	117807820	157	117809667	117814286	upstream	1846	20973	Syngr2	117807820	63.4292989784161	-2.00327608738125	0.282487546701403	-7.09155540048912	1.32612969937475e-12	3.08634259136649e-11	gained-close
Peak_17749	chr11	117807664	117807820	157	117809667	117839908	upstream	1846	71562	Afmid	117807820	63.4292989784161	-2.00327608738125	0.282487546701403	-7.09155540048912	1.32612969937475e-12	3.08634259136649e-11	gained-close
Peak_88527	chr9	44374747	44375002	256	44379490	44392369	upstream	4487	12282	Hyou1	44375002	117.200391341633	1.93254256204502	0.272627690667837	7.08857767643121	1.35497322277644e-12	3.14727711058159e-11	gained-open
Peak_88225	chr9	39940099	39940488	390	39942262	39943194	upstream	1773	259111	Olfr974	39940488	38.6579913885417	2.78361059044227	0.393140898370889	7.08044012204554	1.4369734486666e-12	3.323870662214e-11	gained-open
Peak_93775	chrX	105166963	105167632	670	105164378	105165505	upstream	1457	279610	E530001F21Rik	105167632	112.207782709583	1.59426860742772	0.225772128548721	7.06140575311837	1.64826521588764e-12	3.78117795863886e-11	gained-open
Peak_70684	chr5	136247366	136247509	144	136218149	136244940	upstream	2425	23921	Sh2b2	136247509	80.4260185738458	1.86986172255641	0.265232519491448	7.04989616711273	1.79051350192431e-12	4.07980058677869e-11	gained-open
Peak_6243	chr1	192188053	192188535	483	192190777	192510159	upstream	2241	16510	Kcnh1	192188535	99.6352939815202	1.70722308337469	0.243016472155566	7.02513318637024	2.13862147405451e-12	4.80585328205227e-11	gained-open
Peak_72932	chr6	48535998	48536516	519	48537569	48541801	upstream	1052	76252	Atp6v0e2	48536516	71.0614744472457	-1.93452954543541	0.276851331470693	-6.98761149227196	2.79605362106905e-12	6.16748540160547e-11	gained-close
Peak_82783	chr8	4252163	4252395	233	4253102	4256220	upstream	706	102209	Snapc2	4252395	60.9041830861011	2.43339823322321	0.348265723371102	6.98718843091616	2.80449472372909e-12	6.18322134311617e-11	gained-open
Peak_40536	chr17	47439300	47439694	395	47412734	47437375	upstream	1924	75462	1700001C19Rik	47439694	51.0157262146809	-2.34297309304869	0.335455287061881	-6.98445719419079	2.85959413086347e-12	6.30277237359413e-11	gained-close
Peak_31959	chr15	62220035	62220362	328	62217541	62219451	upstream	583	67552	H2afy3	62220362	69.042496280487	2.0864358756018	0.298773170070378	6.98334417079796	2.88235124822956e-12	6.34452587691964e-11	gained-open
Peak_15350	chr11	83746795	83747252	458	83746940	83752646	overlapStart	0	66107	Wfdc21	83747252	175.963823432181	1.74006611215784	0.249776023700897	6.96650577735813	3.24909560172673e-12	7.10878673674744e-11	gained-open
Peak_66028	chr5	8659767	8660768	1002	8660092	8748570	overlapStart	0	18671	Abcb1a	8660768	160.009972842913	-1.85926468811615	0.266893456422992	-6.96631799458376	3.25343316664091e-12	7.11663117140416e-11	gained-close
Peak_72570	chr6	35544442	35544782	341	35508824	35539888	upstream	4553	14489	Mtpn	35544782	153.233625178204	-1.59944694086104	0.229781070824383	-6.96074282847894	3.38483177080415e-12	7.38697565187306e-11	gained-close
Peak_49364	chr2	30057280	30057473	194	30061996	30072577	upstream	4522	56086	Set	30057473	101.618476859645	-1.67221632442668	0.240392982232976	-6.95617779227041	3.4962858253133e-12	7.59691356889274e-11	gained-close
Peak_77958	chr7	28985378	28985546	169	28971372	28981888	upstream	3489	73830	Eif3k	28985546	69.3658726998916	-1.91899417610271	0.276059686664031	-6.95137417307205	3.6174497910549e-12	7.84037697439955e-11	gained-close
Peak_35876	chr16	30063501	30063762	262	30065357	30067796	upstream	1594	15205	Hes1	30063762	83.7922763035264	-1.82583892792818	0.262782263524255	-6.94810564244819	3.70223736160394e-12	8.0131289826562e-11	gained-close
Peak_20645	chr12	84567488	84568036	549	84569828	84595457	upstream	1791	12677	Vsx2	84568036	76.5743638425764	1.83040921844924	0.263719670584512	6.94073830136484	3.90055999514797e-12	8.41350613089304e-11	gained-open
Peak_91021	chr9	97115623	97115900	278	97077011	97111041	upstream	4581	192287	Slc25a36	97115900	67.6489145726418	2.2653345128781	0.32660785345501	6.93594623924178	4.03511041033866e-12	8.6760376245568e-11	gained-open
Peak_37855	chr16	96443402	96443881	480	96422298	96443614	overlapStart	0	16415	Itgb2l	96443881	46.1134421000477	2.69968463603186	0.389249545747774	6.93561409518304	4.04460308320274e-12	8.69052280920914e-11	gained-open
Peak_77805	chr7	27451362	27451540	179	27356383	27446589	upstream	4772	80297	Sptbn4	27451540	93.0111707019287	1.67939594986329	0.242809090693486	6.91652831064428	4.62845956122984e-12	9.86216318129978e-11	gained-open
Peak_34295	chr15	101373218	101373879	662	101347444	101370125	upstream	3092	74127	Krt80	101373879	327.221599080842	1.50668643308532	0.218423354628855	6.89800976477757	5.27361226426873e-12	1.11092264946205e-10	gained-open
Peak_70311	chr5	127632207	127633312	1106	127632262	127707520	overlapStart	0	319804	Glt1d1	127633312	136.116173852101	-1.52966147544564	0.222026098836049	-6.8895570541695	5.59663754408197e-12	1.1760894968801e-10	gained-close
Peak_33484	chr15	85698422	85698804	383	85703773	85707524	upstream	4968	102800312	Lncppara	85698804	51.5408459046712	-2.1588449733112	0.313474604986667	-6.88682572357983	5.70510419728061e-12	1.19702170700361e-10	gained-close
Peak_65269	chr4	145315070	145315417	348	145268976	145315147	overlapStart	0	21941	Tnfrsf8	145315417	40.2501513289765	-2.47302714727212	0.359455024112187	-6.87993484965252	5.98799397907775e-12	1.25359627878874e-10	gained-close
Peak_12786	chr11	49049954	49050670	717	49050733	49135387	upstream	62	15953	Ifi47	49050670	107.946570754404	1.77400848602985	0.258123812736259	6.87270371231679	6.29963236779185e-12	1.30985279074135e-10	gained-open
Peak_1839	chr1	74273328	74273697	370	74278600	74279589	upstream	4902	227289	Gpbar1	74273697	39.8955208767525	2.64221172265803	0.385186477990834	6.85956510321971	6.90704960787569e-12	1.42861463752227e-10	gained-open
Peak_3236	chr1	121334215	121334740	526	121304353	121332589	upstream	1625	72999	Insig2	121334740	55.5124458497517	2.13830109460603	0.31194849961039	6.85466061634109	7.1482017371363e-12	1.47462445168669e-10	gained-open
Peak_27680	chr14	32318002	32318152	151	32322019	32347820	upstream	3866	239017	Ogdhl	32318152	37.7340804597359	-2.55803904536648	0.373494894574614	-6.84892640441557	7.44062605298439e-12	1.52928061778979e-10	gained-close
Peak_80002	chr7	92638310	92638432	123	92581723	92637142	upstream	1167	73845	Ankrd42	92638432	33.0919599683031	3.03432688371675	0.443514196477631	6.84155525982085	7.83379741458192e-12	1.60485976224326e-10	gained-open
Peak_12674	chr11	44617014	44617414	401	44618100	45008096	upstream	685	13591	Ebf1	44617414	85.8543830117976	-1.69045291473381	0.247298419749842	-6.83568021358085	8.16168251356487e-12	1.66697784084265e-10	gained-close
Peak_16815	chr11	103956918	103957174	257	103821782	103954056	upstream	2861	18195	Nsf	103957174	81.3342838897657	-1.69339459068602	0.247906113329808	-6.83078996294525	8.44483001388077e-12	1.71813244794238e-10	gained-close
Peak_42539	chr18	21299977	21300531	555	21127342	21300139	overlapStart	0	381126	Garem1	21300531	35.2302101976196	-2.76429967437106	0.404855127947356	-6.82787368505436	8.61824152784548e-12	1.74965098279689e-10	gained-close
Peak_78290	chr7	35649184	35649381	198	35641985	35647482	upstream	1701	56330	Pdcd5	35649381	119.797204335857	-1.54126464900107	0.226116087645959	-6.81625383247524	9.34451313109123e-12	1.88536363676694e-10	gained-close
Peak_485	chr1	34433322	34433498	177	34433121	34433199	upstream	122	100628580	Mir5103	34433498	57.7695023865273	-2.2240203690295	0.326610452521376	-6.80939740862684	9.80083948925629e-12	1.96402927498534e-10	gained-close
Peak_62827	chr4	106908269	106908593	325	106911470	107049694	upstream	2876	72475	Ssbp3	106908593	75.9678244077873	-1.70058439198837	0.250253568619314	-6.79544512140522	1.07978615191013e-11	2.14699976224485e-10	gained-close
Peak_80501	chr7	101304431	101304603	173	101289616	101302088	upstream	2342	73683	Atg16l2	101304603	64.828990949631	2.0145772785938	0.296480603313759	6.79497159705189	1.08333869899386e-11	2.15361086272354e-10	gained-open
Peak_336	chr1	24099971	24100565	595	24010758	24100341	overlapStart	0	68187	Fam135a	24100565	106.175399179963	-1.50076445968553	0.221207530079736	-6.78441850123536	1.16555008167356e-11	2.30533959870386e-10	gained-close
Peak_64978	chr4	140778411	140778937	527	140745508	140774203	upstream	4207	18602	Padi4	140778937	70.96928476949	2.20446075552431	0.325341319464863	6.77584009049422	1.23685423575921e-11	2.43677284107113e-10	gained-open
Peak_24973	chr13	60936562	60936778	217	60934155	60936625	overlapStart	0	13024	Ctla2a	60936778	24.0778209135726	-3.68529600642621	0.543894809153827	-6.77575138501445	1.23761343360609e-11	2.43776090984255e-10	gained-close
Peak_44955	chr19	4044183	4044485	303	4040288	4042221	upstream	1961	14869	Gstp2	4044485	52.4847697164851	-2.19073715844504	0.323556759244194	-6.77079707301572	1.28074809937668e-11	2.51382686078071e-10	gained-close
Peak_30231	chr14	118592436	118592613	178	118592369	118592472	overlapStart	0	102465208	Mir6391	118592613	25.3309849730053	-3.23164017177419	0.478802007584566	-6.7494290345126	1.48428084863894e-11	2.88222237205121e-10	gained-close
Peak_78500	chr7	44670814	44671238	425	44605803	44670843	overlapStart	0	71960	Myh14	44671238	58.434583280264	-1.91664289134512	0.284183934577686	-6.74437453402623	1.53687627951779e-11	2.97458505114689e-10	gained-close
Peak_20940	chr12	87509389	87509950	562	87514316	87518265	upstream	4365	666806	Gm8300	87509950	54.3055265592512	-2.12488210265458	0.315127028692998	-6.74293827307549	1.55215163570766e-11	3.00046705451081e-10	gained-close
Peak_21166	chr12	99563394	99563973	580	99563841	99620038	overlapStart	0	102639404	Gm26839	99563973	88.8306235937985	-1.63368748464816	0.24263779722086	-6.73302965721003	1.66166176058509e-11	3.19973890742749e-10	gained-close
Peak_45575	chr19	10523796	10523978	183	10525244	10547735	upstream	1265	269061	Cpsf7	10523978	63.7735649012222	1.88582428622998	0.280391941415822	6.72567220265897	1.74783645841976e-11	3.34999627198662e-10	gained-open
Peak_81980	chr7	132605842	132606108	267	132610643	132706419	upstream	4534	76429	Lhpp	132606108	47.5016487373347	-2.11061637002946	0.315045794608225	-6.69939547250302	2.09283504987766e-11	3.94569056852782e-10	gained-close
Peak_21111	chr12	98268305	98268898	594	98268635	98276722	overlapStart	0	14744	Gpr65	98268898	90.9060651777102	1.58977720701289	0.237367306801223	6.69754073733585	2.11956154502111e-11	3.99289604795435e-10	gained-open
Peak_14489	chr11	73175747	73175881	135	73177083	73183162	upstream	1201	76281	Tax1bp3	73175881	66.1164163240357	-1.79704113301128	0.268347187717352	-6.69670194160594	2.13175794430311e-11	4.01427332959276e-10	gained-close
Peak_82284	chr7	140112108	140112422	315	140115899	140134334	upstream	3476	212503	Paox	140112422	65.8614145933677	2.02893696422378	0.303073814557511	6.69453072739405	2.16364820915261e-11	4.06946525795412e-10	gained-open
Peak_30373	chr14	121915798	121916738	941	121911434	121915774	upstream	23	110168	Gpr18	121916738	65.8338137134099	2.00831938534818	0.300083472417741	6.6925358106775	2.19336048906188e-11	4.121323381043e-10	gained-open
Peak_11565	chr11	5757985	5758095	111	5762150	5784710	upstream	4054	76508	Ube2d-ps	5758095	38.8396375906331	2.49798631290567	0.373314256813502	6.69137668147936	2.21080765026355e-11	4.15073761779784e-10	gained-open
Peak_26823	chr13	120055734	120056172	439	120034605	120052204	upstream	3529	100861753	Gm21188	120056172	102.617692536417	1.50483538486906	0.224950416534121	6.68963146658947	2.23733312377658e-11	4.19077220187105e-10	gained-open
Peak_66481	chr5	25096555	25096719	165	25100975	25103007	upstream	4255	67261	2900005J15Rik	25096719	79.7120554236847	-1.61309696919131	0.241224254588243	-6.68712593575956	2.27596013888513e-11	4.25616692823418e-10	gained-close
Peak_71580	chr5	147726955	147727288	334	147562196	147725988	upstream	966	14254	Flt1	147727288	97.8822544101319	-1.53320562033144	0.229443202260293	-6.68228827538803	2.35239691432815e-11	4.38092248970333e-10	gained-close
Peak_72355	chr6	30307849	30307967	119	30211289	30304539	upstream	3309	22214	Ube2h	30307967	44.7682728349528	-2.20493772066812	0.330181122443284	-6.67796421658501	2.42284174245147e-11	4.50590457806887e-10	gained-close
Peak_78127	chr7	30698762	30698950	189	30698926	30700534	overlapStart	0	69147	2200002J24Rik	30698950	21.6958214281316	-4.16158588092992	0.623352114060007	-6.67613983664023	2.4531790735744e-11	4.55248056952883e-10	gained-close
Peak_40127	chr17	37482845	37483761	917	37480851	37483529	overlapStart	0	14990	H2-M2	37483761	48.5700951009645	2.36518493776091	0.35553429658748	6.65248039489475	2.88194219146653e-11	5.2849200032154e-10	gained-open
Peak_24931	chr13	59734371	59734586	216	59725925	59731752	upstream	2618	238663	Spata31d1d	59734586	40.6614870545233	-2.30326300115716	0.34645123531245	-6.64815929745477	2.96781014386634e-11	5.42765603074847e-10	gained-close
Peak_33632	chr15	89309788	89310228	441	89305658	89305732	upstream	4055	102465981	Mir6959	89310228	81.9592203474062	-1.66337869844415	0.250896915326551	-6.6297295695294	3.36302423343346e-11	6.08806487998864e-10	gained-close
Peak_36609	chr16	44765643	44766035	393	44765736	44794977	overlapStart	0	57781	Cd200r1	44766035	101.378986212635	1.55649165665332	0.234787133740753	6.62937373038491	3.37114066719355e-11	6.09925672137144e-10	gained-open
Peak_91188	chr9	102621502	102621633	132	102626296	102634244	upstream	4662	69010	Anapc13	102621633	57.152842491052	-1.87794132763986	0.283790844016109	-6.61734290318845	3.65712521593826e-11	6.58143405324434e-10	gained-close
Peak_21788	chr12	111186953	111187396	444	111159850	111184491	upstream	2461	78062	4930595D18Rik	111187396	55.8729549050946	2.03586584431949	0.308277221465592	6.60400997076821	4.00182593230146e-11	7.14333479530776e-10	gained-open
Peak_21850	chr12	111716573	111716727	155	111709488	111713256	upstream	3316	70369	Bag5	111716727	41.5232456214253	-2.33979969911768	0.354385434417526	-6.60241497499303	4.04513286768079e-11	7.21519306334481e-10	gained-close
Peak_60331	chr3	158032255	158032540	286	158036682	158067090	upstream	4141	67144	Lrrc40	158032540	64.5807282933664	1.86020774062101	0.28177490783904	6.60175086166163	4.06329962782295e-11	7.24077085307625e-10	gained-open
Peak_45484	chr19	9087714	9088271	558	9083642	9087956	overlapStart	0	22287	Scgb1a1	9088271	80.6486395770999	1.66464771556089	0.252157929761258	6.60160763985084	4.0672278993561e-11	7.24504166157943e-10	gained-open
Peak_4431	chr1	154260329	154260806	478	154241521	154256906	upstream	3422	78112	4930452N14Rik	154260806	94.3653589662824	1.78064848913352	0.269933476283533	6.596619706639	4.20637891391759e-11	7.47461839838632e-10	gained-open
Peak_9156	chr10	79923776	79924141	366	79927043	79955018	upstream	2901	13496	Arid3a	79924141	106.444569792989	1.59941624296906	0.243061473053087	6.58029519396409	4.69515160668348e-11	8.27785152631192e-10	gained-open
Peak_59740	chr3	133092896	133093393	498	132982550	133092033	upstream	862	67553	Gstcd	133093393	104.660977370262	1.64509540795052	0.250104153395	6.57764129711335	4.77969581394876e-11	8.41436364299286e-10	gained-open
Peak_44975	chr19	4144725	4145258	534	4148663	4154035	upstream	3404	23789	Coro1b	4145258	93.9849374402687	1.57935610693648	0.24026493103817	6.57339421159875	4.91810197134374e-11	8.63872920722143e-10	gained-open
Peak_41633	chr17	83518444	83518580	137	83501917	83514333	upstream	4110	20463	Cox7a2l	83518580	41.3531516175319	-2.30571295488842	0.350777286714377	-6.57315351425778	4.92606225912273e-11	8.65110536637396e-10	gained-close
Peak_9859	chr10	88828451	88828732	282	88746607	88826814	upstream	1636	70683	Utp20	88828732	87.5859491007883	-1.53413441633281	0.23358498245973	-6.56777845980441	5.1071447171345e-11	8.94587174799531e-10	gained-close
Peak_11167	chr10	128263133	128263779	647	128267997	128270151	upstream	4217	103161	Apof	128263779	89.031316455896	1.58245659220794	0.241625519968964	6.54921132673073	5.78417325424028e-11	1.00616217559332e-09	gained-open
Peak_38842	chr17	25347699	25348285	587	25343245	25345562	upstream	2136	100503895	Tpsab1	25348285	69.5518969670295	-1.81095531870322	0.276579295032164	-6.54768940130758	5.8434089237741e-11	1.01546940602971e-09	gained-close
Peak_36439	chr16	37384729	37385089	361	37107307	37384958	overlapStart	0	207227	Stxbp5l	37385089	24.5848281193196	-3.34790031414415	0.511532582156304	-6.54484275474981	5.95580181326187e-11	1.03310338530519e-09	gained-close
Peak_78444	chr7	44135933	44136632	700	44137290	44141610	upstream	657	16615	Klk1b16	44136632	38.6970268966568	2.70626374101392	0.413741686213384	6.54095014157743	6.11292102060807e-11	1.0588044783516e-09	gained-open
Peak_38559	chr17	17700309	17700573	265	17703941	17734167	upstream	3367	626942	Vmn2r90	17700573	35.5378860696233	-2.37885474539905	0.363900489368735	-6.53710235324412	6.27221267450035e-11	1.08381543796124e-09	gained-close
Peak_18705	chr12	17540625	17540871	247	17544873	17551502	upstream	4001	18263	Odc1	17540871	72.1748077682606	-1.76607030423678	0.27016889331711	-6.53691208692876	6.28019382446613e-11	1.08479827817682e-09	gained-close
Peak_57277	chr3	69859895	69860348	454	69819538	69859894	upstream	0	66183	Sptssb	69860348	43.0103917440566	-2.30415095368436	0.352649971720603	-6.53381862599407	6.41135824281531e-11	1.10583948572431e-09	gained-close
Peak_92520	chr9	123980670	123981307	638	123976949	123978408	upstream	2261	12770	Ccr1l1	123981307	49.9034351910743	2.49337902461966	0.382491574184324	6.51878157038328	7.08807820192848e-11	1.21414942308826e-09	gained-open
Peak_86490	chr8	120102970	120103123	154	120081095	120101472	upstream	1497	102193	Zdhhc7	120103123	25.6534753180088	4.71427208950632	0.723266850802765	6.5180259323013	7.12386786746771e-11	1.21961752347023e-09	gained-open
Peak_74075	chr6	85513427	85513885	459	85511122	85513542	overlapStart	0	13656	Egr4	85513885	75.7447567913298	-1.65130577417107	0.253542667605491	-6.51293050501653	7.36986129792556e-11	1.25718192923106e-09	gained-close
Peak_82527	chr7	143058149	143058640	492	143021784	143053686	upstream	4462	97423	R74862	143058640	84.6783728676181	-1.63473792290299	0.251014417112981	-6.5125260202373	7.3897407983116e-11	1.25898400497941e-09	gained-close
Peak_38572	chr17	17887856	17888097	242	17876471	17883939	upstream	3916	14293	Fpr1	17888097	29.7335276316219	3.25694560154201	0.50017419149071	6.51162266456625	7.43432818599867e-11	1.26635227289267e-09	gained-open
Peak_68879	chr5	105412800	105413088	289	105415775	105486189	upstream	2686	433926	Lrrc8b	105413088	60.5853743145899	-1.90023095990585	0.291898977050871	-6.50989249467182	7.5204607293065e-11	1.27987175347503e-09	gained-close
Peak_29133	chr14	66872673	66872805	133	66802864	66868600	upstream	4072	12934	Dpysl2	66872805	65.9000544567459	1.85498159486505	0.28507238984092	6.50705456217697	7.66385823113207e-11	1.30170012893085e-09	gained-open
Peak_6231	chr1	191999042	191999300	259	191998554	191998634	upstream	407	100628582	Mir3473c	191999300	69.0414630286595	-1.78881276374535	0.274963521261253	-6.50563665878331	7.73650150683882e-11	1.31262457237445e-09	gained-close
Peak_10028	chr10	93829977	93830191	215	93831555	93858087	upstream	1363	327799	Usp44	93830191	37.3624147836034	-2.52567964025957	0.388350891287101	-6.50360201798115	7.84191964609985e-11	1.32812862520394e-09	gained-close
Peak_92364	chr9	122276203	122276539	337	122273890	122274028	upstream	2174	102465896	Mir8106	122276539	20.7758642996179	-4.29988719912738	0.661176505798804	-6.50338776622507	7.85310179119508e-11	1.32954643532176e-09	gained-close
Peak_81650	chr7	126861062	126861245	184	126861972	126865122	upstream	726	233876	Hirip3	126861245	70.8000762728607	-1.70284740072864	0.261971039760505	-6.50013605429586	8.02474028589526e-11	1.3561382361805e-09	gained-close
Peak_45678	chr19	11626546	11626862	317	11615520	11623719	upstream	2826	14126	Ms4a2	11626862	24.6121208294222	-3.36367953238228	0.517592095544197	-6.49870730511389	8.10131037022297e-11	1.3681409655218e-09	gained-close
Peak_6554	chr10	7664998	7665383	386	7630236	7663584	upstream	1413	18537	Pcmt1	7665383	95.7554945479811	1.60037139640619	0.24646293986635	6.49335513596498	8.39454848606163e-11	1.41287075978002e-09	gained-open
Peak_6554	chr10	7664998	7665383	386	7667504	7678886	upstream	2120	69912	Nup43	7665383	95.7554945479811	1.60037139640619	0.24646293986635	6.49335513596498	8.39454848606163e-11	1.41287075978002e-09	gained-open
Peak_77721	chr7	25790622	25790945	324	25756500	25788733	upstream	1888	26362	Axl	25790945	53.202600201542	-1.91928438354035	0.295706510886092	-6.49050431047044	8.55495181309561e-11	1.43812834336877e-09	gained-close
Peak_2680	chr1	91801324	91801571	248	91801461	91848034	overlapStart	0	13345	Twist2	91801571	30.8412405143452	-2.76319378308297	0.425917729204816	-6.48762329814686	8.72009717917371e-11	1.46375712159849e-09	gained-close
Peak_92679	chrX	9469142	9469423	282	9435254	9469324	overlapStart	0	13058	Cybb	9469423	45.2190372504874	2.19989745927647	0.339403031167485	6.48166709563325	9.07146261191085e-11	1.51815813172199e-09	gained-open
Peak_33915	chr15	97844926	97845088	163	97792664	97844502	upstream	423	56233	Hdac7	97845088	37.1119445814757	-2.54258282155221	0.392382752611479	-6.479853675092	9.1811613172695e-11	1.53461651516183e-09	gained-close
Peak_81283	chr7	120150123	120150612	490	120132361	120145290	upstream	4832	22787	Zp2	120150612	45.6544466578354	2.20377506708817	0.340306633684166	6.47585103831229	9.42790245847633e-11	1.57252492945453e-09	gained-open
Peak_82419	chr7	141838804	141839052	249	141839072	141873085	upstream	19	74180	Muc5b	141839052	33.1720869561977	-2.52209760695753	0.390230882073885	-6.46309075682023	1.02585722162321e-10	1.70147700401272e-09	gained-close
Peak_40128	chr17	37491870	37492457	588	37492468	37499674	upstream	10	258325	Olfr110	37492457	60.2032162781618	1.99111729844038	0.308364195227229	6.45703142342175	1.06776732963183e-10	1.76541761599351e-09	gained-open
Peak_45419	chr19	8666814	8667381	568	8651796	8663335	upstream	3478	402757	9830166K06Rik	8667381	70.951833629251	2.02073899920623	0.313533122168304	6.44505749578032	1.15556601095605e-10	1.89947047334716e-09	gained-open
Peak_29645	chr14	76114546	76114903	358	76086232	76110815	upstream	3730	67467	Gpalpp1	76114903	97.6532667896333	1.50628084180343	0.233786748861648	6.44296928349359	1.17158413753679e-10	1.92328455519357e-09	gained-open
Peak_17582	chr11	116307897	116308070	174	116287998	116306738	upstream	1158	53413	Exoc7	116308070	79.0982227452384	-1.63408023328824	0.253736677795135	-6.44006316898175	1.19423788184437e-10	1.95911338737243e-09	gained-close
Peak_76586	chr6	145075623	145076217	595	144993835	145076157	overlapStart	0	12035	Bcat1	145076217	61.1606343403173	-1.81592859823297	0.282335031277074	-6.43182176161086	1.26083540496899e-10	2.05766076112638e-09	gained-close
Peak_72905	chr6	47832256	47832453	198	47835661	47868257	upstream	3207	272347	Zfp398	47832453	87.5911116184822	1.56377666774668	0.243527362438402	6.42135919384508	1.35062909568035e-10	2.19059859807878e-09	gained-open
Peak_72905	chr6	47832256	47832453	198	47819266	47830505	upstream	1750	330301	Zfp786	47832453	87.5911116184822	1.56377666774668	0.243527362438402	6.42135919384508	1.35062909568035e-10	2.19059859807878e-09	gained-open
Peak_15185	chr11	82032746	82033020	275	82035577	82037452	upstream	2556	20296	Ccl2	82033020	37.9274496890328	2.51194084986883	0.391514220392199	6.41596324994912	1.39935203466915e-10	2.2657384664027e-09	gained-open
Peak_64012	chr4	130175360	130175862	503	130164454	130175122	upstream	237	94242	Tinagl1	130175862	115.119546449453	-1.77210938511278	0.276288129034801	-6.41399031982862	1.41759213203262e-10	2.29252514945432e-09	gained-close
Peak_35349	chr16	20325308	20325780	473	20308387	20325404	overlapStart	0	224044	Cyp2ab1	20325780	68.1094563988998	1.80087977333947	0.281288637064188	6.40224856622458	1.53105135339705e-10	2.45836124133539e-09	gained-open
Peak_83913	chr8	39642626	39643012	387	39581700	39642678	overlapStart	0	20288	Msr1	39643012	49.6453769044112	2.23181388450084	0.349581276880625	6.38424890605041	1.72240742881337e-10	2.73957762626627e-09	gained-open
Peak_45418	chr19	8663259	8663643	385	8664005	8683606	upstream	361	12669	Chrm1	8663643	88.5590516281644	1.62213378057274	0.254193467390014	6.3814927945566	1.75369975247349e-10	2.7860708443746e-09	gained-open
Peak_45418	chr19	8663259	8663643	385	8651796	8663335	overlapStart	0	402757	9830166K06Rik	8663643	88.5590516281644	1.62213378057274	0.254193467390014	6.3814927945566	1.75369975247349e-10	2.7860708443746e-09	gained-open
Peak_19307	chr12	40202547	40202875	329	40176386	40199315	upstream	3231	380755	Lsmem1	40202875	45.9784214737366	2.13910949550411	0.33566755271517	6.37270262854166	1.85725790012647e-10	2.93923956004291e-09	gained-open
Peak_80965	chr7	112953773	112954058	286	112953962	112957458	overlapStart	0	78748	Rassf10	112954058	29.8618595836948	-2.79532421418873	0.439913698154451	-6.35425590500098	2.09437925224922e-10	3.28809896346316e-09	gained-close
Peak_91747	chr9	110856763	110857498	736	110857967	110864628	upstream	468	235631	Prss50	110857498	72.4833062103419	1.73149977014238	0.272522224362806	6.35360941365742	2.10320465882568e-10	3.30085899059161e-09	gained-open
Peak_45046	chr19	4708733	4709132	400	4711223	4752352	upstream	2090	20743	Sptbn2	4709132	59.3152943365689	1.83429741892525	0.288887894568538	6.34951291976018	2.15997726476923e-10	3.38490656138409e-09	gained-open
Peak_73530	chr6	65588921	65589269	349	65590398	65634040	upstream	1128	414084	Tnip3	65589269	37.927628853975	2.52052570324716	0.397005434207344	6.34884433831394	2.16938402516886e-10	3.397959355714e-09	gained-open
Peak_2124	chr1	84218546	84218961	416	84218849	84218961	includeFeature	0	102465181	Mir6353	84218961	35.4752371949586	2.46156026310595	0.388255298378211	6.34005581736602	2.29681934415413e-10	3.58544277740436e-09	gained-open
Peak_78723	chr7	46391813	46391979	167	46396468	46438704	upstream	4488	16502	Kcnc1	46391979	34.1798055263673	-2.46403199885464	0.388656790094715	-6.33986607632447	2.29964972748937e-10	3.5889254721026e-09	gained-close
Peak_25011	chr13	62892238	62892659	422	62864753	62888282	upstream	3955	14121	Fbp1	62892659	37.206735944645	2.4072123765315	0.380270482133691	6.33026356141207	2.44742782777933e-10	3.80136852856495e-09	gained-open
Peak_69951	chr5	122281297	122281475	179	122284398	122324281	upstream	2922	320717	Pptc7	122281475	68.9923863103474	1.72963942482341	0.27358435966919	6.3221429284731	2.57960604509369e-10	3.98247730910792e-09	gained-open
Peak_58220	chr3	95526578	95526966	389	95526786	95556405	overlapStart	0	13040	Ctss	95526966	80.9638295953532	1.66330432684102	0.263269540610577	6.31787605578477	2.6518255597654e-10	4.08464032737163e-09	gained-open
Peak_45152	chr19	5599301	5599537	237	5601873	5602959	upstream	2335	68209	Rnaseh2c	5599537	86.6401805867042	2.01780244400298	0.320536667713715	6.29507525112593	3.07250768882861e-10	4.66952068127421e-09	gained-open
Peak_61216	chr4	42968728	42969025	298	42969946	42974325	upstream	920	67317	1700022I11Rik	42969025	68.4883235993258	1.72966321743062	0.274895084376312	6.29208492889176	3.13230017118551e-10	4.75251843939192e-09	gained-open
Peak_57628	chr3	87000689	87000965	277	86995834	86999340	upstream	1348	12479	Cd1d1	87000965	108.402512669058	-1.54559405528577	0.245655597708548	-6.29171111793472	3.13985407402162e-10	4.76192745314026e-09	gained-close
Peak_54759	chr2	164681337	164681795	459	164685107	164687706	upstream	3311	408190	Wfdc13	164681795	85.2884707132644	1.51690028531734	0.241382041675982	6.2842300727307	3.29482458634212e-10	4.98257952070784e-09	gained-open
Peak_30042	chr14	103034189	103034368	180	102987412	103033803	upstream	385	71264	4933432I03Rik	103034368	56.9931560043914	2.01447603196335	0.320937981886427	6.27683897095179	3.45525606994246e-10	5.20464473150096e-09	gained-open
Peak_51580	chr2	91115158	91115327	170	91118144	91136516	upstream	2816	17868	Mybpc3	91115327	71.7211254992312	-1.64914369259073	0.263207749818446	-6.26555902600996	3.71490246617776e-10	5.56284310755525e-09	gained-close
Peak_80702	chr7	105739171	105739298	128	105731730	105737385	upstream	1785	101867	Rrp8	105739298	61.5039241078729	-1.81393195804638	0.289818286432043	-6.25885957845423	3.87802855273491e-10	5.78500109208513e-09	gained-close
Peak_91612	chr9	108825887	108826072	186	108826320	108852969	upstream	247	107934	Celsr3	108826072	96.0462602989953	-1.59436270422094	0.255268991668712	-6.24581424401952	4.21597984961872e-10	6.25559895942642e-09	gained-close
Peak_43705	chr18	61101377	61101686	310	61105572	61131139	upstream	3885	12978	Csf1r	61101686	71.3746213509781	1.65781177817719	0.265472480140457	6.24475944662918	4.24452839972057e-10	6.29203782174811e-09	gained-open
Peak_49120	chr2	27160472	27161079	608	27165507	27183204	upstream	4427	13166	Dbh	27161079	84.2123277851636	1.67623702894577	0.268791566301352	6.23619651468708	4.48337832627817e-10	6.61397925987639e-09	gained-open
Peak_49268	chr2	28843686	28843805	120	28822299	28840360	upstream	3325	269252	Gtf3c4	28843805	39.6150800263026	2.23010878601908	0.358317805024863	6.22382911132293	4.85165517910592e-10	7.1180448764278e-09	gained-open
Peak_57642	chr3	87266540	87266869	330	87250965	87263524	upstream	3015	80891	Fcrls	87266869	75.0153956522934	-1.64258444623209	0.264082521306387	-6.21996653964985	4.97260913500434e-10	7.28120507392386e-09	gained-close
Peak_3877	chr1	136050495	136050686	192	136050804	136051370	upstream	117	226439	Ascl5	136050686	22.1058018407404	-3.21354610281883	0.517156936233942	-6.21387025420296	5.16952180762815e-10	7.54850717907808e-09	gained-close
Peak_9003	chr10	77713633	77714071	439	77715807	77716169	upstream	1735	100502921	Gm10142	77714071	34.3509543291496	2.58229266849914	0.416411316069497	6.20130281970572	5.59976480843474e-10	8.11910114125329e-09	gained-open
Peak_31387	chr15	39861280	39861514	235	39768485	39857470	upstream	3809	64705	Dpys	39861514	53.4653469746803	1.91461012090732	0.308823686399388	6.19968676376474	5.65756455537014e-10	8.19536904494485e-09	gained-open
Peak_90913	chr9	95749962	95750464	503	95705067	95750358	overlapStart	0	22063	Trpc1	95750464	60.8168430980257	-1.7995080279023	0.290854583004107	-6.1869681038407	6.13323687204832e-10	8.83570896173295e-09	gained-close
Peak_5330	chr1	172590503	172590958	456	172581377	172590568	overlapStart	0	74748	Slamf8	172590958	38.2956651779955	2.68757608634591	0.434912800305641	6.17957458243856	6.4274564225276e-10	9.21606460002495e-09	gained-open
Peak_49888	chr2	35253901	35254055	155	35256359	35307902	upstream	2303	227753	Gsn	35254055	45.0726202072769	2.29016371649416	0.370700878557895	6.1779290229993	6.49478988072482e-10	9.29851833316967e-09	gained-open
Peak_25745	chr13	94354623	94354920	298	94358960	94566316	upstream	4039	11774	Ap3b1	94354920	49.5878383666107	-2.2614031975978	0.366239204430358	-6.17466172447362	6.6305279860178e-10	9.47415954779604e-09	gained-close
Peak_72626	chr6	38507107	38507407	301	38507325	38507393	includeFeature	0	102466843	Mir7670	38507407	43.4060210230382	2.29148602248627	0.371164801849662	6.17376974073748	6.66806334789137e-10	9.52065803034426e-09	gained-open
Peak_80640	chr7	103252588	103252840	253	103250086	103252505	upstream	82	384701	Usp17ld	103252840	43.7533741336944	-2.03029329880842	0.328890062859231	-6.17316704906771	6.69354234799239e-10	9.55415309858431e-09	gained-close
Peak_18162	chr11	121082324	121083418	1095	121067403	121081139	upstream	1184	209588	Sectm1a	121083418	88.5129337686093	1.64661772595587	0.266953638048275	6.16817863204436	6.9081078360414e-10	9.8351911201886e-09	gained-open
Peak_42905	chr18	35726687	35726850	164	35713089	35722351	upstream	4335	68545	Ecscr	35726850	51.6823187079111	-1.89038773419792	0.307222153344336	-6.15316217798645	7.59530646091397e-10	1.07231989709182e-08	gained-close
Peak_42905	chr18	35726687	35726850	164	35726989	35730869	upstream	138	73449	1700066B19Rik	35726850	51.6823187079111	-1.89038773419792	0.307222153344336	-6.15316217798645	7.59530646091397e-10	1.07231989709182e-08	gained-close
Peak_63608	chr4	123914708	123914867	160	123917433	123936997	upstream	2565	54170	Rragc	123914867	42.2620498506308	2.23610766079207	0.363508458920225	6.15145976914612	7.67730021565143e-10	1.08228082879142e-08	gained-open
Peak_13739	chr11	61683831	61684466	636	61684410	61709950	overlapStart	0	69640	Fam83g	61684466	70.384317706163	-1.59202084480888	0.259667354699766	-6.13100112892364	8.73277857473416e-10	1.217467211673e-08	gained-close
Peak_69937	chr5	122207871	122208068	198	122209729	122242297	upstream	1660	74096	Hvcn1	122208068	52.5656248118361	2.06460506001969	0.336960768757742	6.1271377900495	8.94739833386913e-10	1.24481995113827e-08	gained-open
Peak_44950	chr19	3986251	3986662	412	3986570	3990007	overlapStart	0	71670	Acy3	3986662	64.9439655548877	-1.62291869589103	0.264903971773174	-6.126441536636	8.98662053495961e-10	1.25009296034464e-08	gained-close
Peak_28337	chr14	54417760	54418095	336	54369442	54417702	upstream	57	20540	Slc7a7	54418095	65.113727994385	-1.62814024615905	0.265794655431581	-6.12555675175399	9.03670532032994e-10	1.25669049468637e-08	gained-close
Peak_13855	chr11	62815593	62815780	188	62820253	62851316	upstream	4472	94092	Trim16	62815780	56.5854722153893	-1.7663908182577	0.288426865281118	-6.12422430391868	9.11264489984947e-10	1.26632033401169e-08	gained-close
Peak_52337	chr2	118302920	118303572	653	118304914	118308166	upstream	1341	73358	1700054M17Rik	118303572	71.6069759372909	1.59537607128882	0.260678238587038	6.12009686706602	9.35184894959405e-10	1.2955645361331e-08	gained-open
Peak_91775	chr9	111017116	111017559	444	111019292	111042766	upstream	1732	17002	Ltf	111017559	79.59686143744	4.00884829997217	0.655298220736793	6.11759375062055	9.49988734485443e-10	1.31299684754901e-08	gained-open
Peak_85210	chr8	85488743	85488882	140	85492617	85527558	upstream	3734	108682	Gpt2	85488882	81.4606751028723	-1.61591068665668	0.26421781294254	-6.11582795520335	9.60569149333568e-10	1.32645752360023e-08	gained-close
Peak_92487	chr9	123683576	123684030	455	123636907	123678832	upstream	4743	102680	Slc6a20a	123684030	56.8809544450906	-1.94056758218405	0.31798595435356	-6.10268332803902	1.04302366472247e-09	1.43029854797411e-08	gained-close
Peak_68846	chr5	105114831	105114984	154	105078394	105110292	upstream	4538	236573	Gbp9	105114984	27.2223694974854	-2.59108290155083	0.425431094750333	-6.09048782170337	1.12567147469661e-09	1.53539901290581e-08	gained-close
Peak_8362	chr10	61676040	61676215	176	61680321	61693297	upstream	4105	20224	Sar1a	61676215	94.0798876325509	-1.55344388736062	0.25518645230635	-6.08748573178845	1.14697594091318e-09	1.56063290473224e-08	gained-close
Peak_93932	chrX	134717735	134718161	427	134717938	134721917	overlapStart	0	78248	Armcx1	134718161	54.1641562266365	-1.81935530317361	0.299053442030049	-6.08371296723211	1.17430755809815e-09	1.59415326218157e-08	gained-close
Peak_18165	chr11	121145895	121146133	239	121146143	121148314	upstream	9	73679	Tex19.1	121146133	33.3919287805854	-2.51189901653883	0.413598502479935	-6.07327879931259	1.25324591432747e-09	1.68943549402771e-08	gained-close
Peak_90244	chr9	71774951	71775245	295	71626507	71771602	upstream	3348	68178	Cgnl1	71775245	35.9739747167937	-2.29017774752663	0.377465280259059	-6.06725404242437	1.30115660267828e-09	1.74804347561746e-08	gained-close
Peak_23482	chr13	33323884	33324104	221	33324077	33335370	overlapStart	0	20709	Serpinb9f	33324104	22.0635861117978	-3.00077922219812	0.494633424536568	-6.06667296090961	1.30587084256628e-09	1.75362976482364e-08	gained-close
Peak_16775	chr11	103342474	103342669	196	103344753	103350126	upstream	2083	653030	Arhgap27os3	103342669	40.8524723050596	-2.08815678027444	0.344467000660872	-6.06199367796696	1.34444500554747e-09	1.79955523761777e-08	gained-close
Peak_5202	chr1	171410169	171410462	294	171411313	171418759	upstream	850	22278	Usf1	171410462	51.951965144963	1.9647566616272	0.32411806475302	6.06185484639481	1.34560627973644e-09	1.80060010892144e-08	gained-open
Peak_28179	chr14	50392736	50393284	549	50392758	50393696	overlapStart	0	258660	Olfr736	50393284	53.8385934940238	1.81295660858597	0.299254905188803	6.05823522739639	1.37623045789084e-09	1.83845889154505e-08	gained-open
Peak_1840	chr1	74274805	74275343	539	74278600	74279589	upstream	3256	227289	Gpbar1	74275343	56.3313916400519	1.97753714800618	0.326456674996469	6.05757915051842	1.3818535295021e-09	1.8451889204245e-08	gained-open
Peak_75689	chr6	122742196	122742983	788	122727809	122742745	overlapStart	0	20527	Slc2a3	122742983	100.647326368696	1.57299141778282	0.25983762363145	6.05374770519732	1.41514191750796e-09	1.8856467077149e-08	gained-open
Peak_72934	chr6	48541666	48541827	162	48536582	48537474	upstream	4191	69432	1700026J14Rik	48541827	18.9909288443443	-3.47380731882554	0.574061468493502	-6.05128110747754	1.43698442503153e-09	1.91286546383189e-08	gained-close
Peak_33247	chr15	82247193	82247363	171	82233762	82244747	upstream	2445	66570	Cenpm	82247363	55.3417555575619	-1.7200512108036	0.284543081444903	-6.0449588233501	1.49448165302922e-09	1.98215240805386e-08	gained-close
Peak_86088	chr8	111092526	111092646	121	111094745	111135144	upstream	2098	319518	Pdpr	111092646	60.346021045737	-1.74691874096706	0.289548156265959	-6.0332580372657	1.60686519785399e-09	2.11637322717771e-08	gained-close
Peak_51123	chr2	73592449	73593410	962	73596526	73616012	upstream	3115	329427	Chn1os3	73593410	58.2442895993598	1.81742387011461	0.301247945940543	6.03298344305826	1.60959912962543e-09	2.11967894289176e-08	gained-open
Peak_39026	chr17	27087462	27087676	215	27091245	27091311	upstream	3568	102465779	Mir7677	27087676	78.5293206793305	-1.5225898370733	0.252500859806348	-6.030038227359	1.63920900255512e-09	2.15537188180305e-08	gained-close
Peak_18558	chr12	12941596	12942074	479	12936093	12941836	overlapStart	0	18109	Mycn	12942074	73.0490694820764	-3.90935093174991	0.648431434676957	-6.02893493850666	1.65043708089163e-09	2.1683273222446e-08	gained-close
Peak_80544	chr7	101563973	101564507	535	101552453	101560865	upstream	3107	11871	Art2a-ps	101564507	62.7010314657375	-1.69531501803219	0.281553161170689	-6.02129633701545	1.73025640399896e-09	2.26219786286243e-08	gained-close
Peak_9890	chr10	89868944	89869264	321	89873509	90972985	upstream	4244	77531	Anks1b	89869264	31.2183501913826	-2.37314024293426	0.394301707727277	-6.01858981695221	1.75943080408171e-09	2.29684987789366e-08	gained-close
Peak_76136	chr6	129407138	129407716	579	129408862	129424764	upstream	1145	232414	Clec9a	129407716	61.1904166453694	1.72906110843473	0.28744512877975	6.01527364813892	1.7958307402987e-09	2.33791610040868e-08	gained-open
Peak_16894	chr11	105589383	105589808	426	105589986	105929304	upstream	177	77097	Tanc2	105589808	45.1931824222514	-1.93260197955195	0.321467622455251	-6.01180910472866	1.83464287621387e-09	2.38254253873836e-08	gained-close
Peak_3786	chr1	135108627	135108876	250	134986353	135105276	upstream	3350	329252	Lgr6	135108876	46.0709231342473	-1.86887846335511	0.312228733783188	-5.98560690014155	2.15584472409626e-09	2.75504317125289e-08	gained-close
Peak_62042	chr4	63361604	63361819	216	63362449	63365877	upstream	629	18406	Orm2	63361819	51.3858796632489	1.95216391698445	0.326398259873133	5.98092623944512	2.21872333790493e-09	2.82585541337957e-08	gained-open
Peak_82486	chr7	142496974	142497267	294	142498836	142516009	upstream	1568	21957	Tnnt3	142497267	48.9503243989756	1.9166405765199	0.320479110410446	5.98054760594288	2.22388718089821e-09	2.83166986051219e-08	gained-open
Peak_80737	chr7	106693032	106693259	228	106688782	106689729	upstream	3302	258444	Olfr694	106693259	35.0054087201746	2.31972857946436	0.388221162234428	5.97527596412579	2.29701010409408e-09	2.91731692721069e-08	gained-open
Peak_24748	chr13	55572111	55572265	155	55539316	55571120	upstream	990	212483	Fam193b	55572265	40.3974411587922	-2.100382976191	0.35161857166048	-5.97346996284119	2.32259566619718e-09	2.945857160427e-08	gained-close
Peak_21470	chr12	103532051	103532495	445	103532565	103613832	upstream	69	74521	Ppp4r4	103532495	60.990098772007	-1.82220792496786	0.305306919272024	-5.9684462091876	2.39523583699133e-09	3.02743729585039e-08	gained-close
Peak_82335	chr7	141056962	141057473	512	141061274	141072119	upstream	3800	330671	B4galnt4	141057473	51.1086956923108	1.92937992579156	0.323336105625417	5.96710324712929	2.41502604258189e-09	3.04959895601311e-08	gained-open
Peak_51487	chr2	89792179	89792387	209	89788406	89789350	upstream	2828	258468	Olfr1254	89792387	66.3211220529783	-1.58180616795356	0.265147772084237	-5.96575319309499	2.43508125068917e-09	3.07164395736932e-08	gained-close
Peak_35533	chr16	22601800	22601999	200	22605326	22605432	upstream	3326	102465962	Mir6362	22601999	40.281611355108	-2.00574185901738	0.336291645885022	-5.96429284985314	2.45695744962087e-09	3.09717410364866e-08	gained-close
Peak_92921	chrX	20923425	20923803	379	20860511	20920918	upstream	2506	20964	Syn1	20923803	61.8458114904331	1.66960067846044	0.28006904150892	5.96138962544797	2.50101826249641e-09	3.14559071711959e-08	gained-open
Peak_57970	chr3	89999782	90000214	433	89995446	89998716	upstream	1065	23897	Hax1	90000214	47.2220078950036	2.32831191061726	0.391105887148756	5.95314974057574	2.63030431169562e-09	3.2954915867074e-08	gained-open
Peak_48251	chr2	6189160	6189842	683	6193251	6321611	upstream	3408	320132	A230108P19Rik	6189842	104.921761814851	1.55475073933485	0.26117158310691	5.95298585259335	2.63294065885878e-09	3.29835783861221e-08	gained-open
Peak_76488	chr6	142572732	142573301	570	142564939	142571356	upstream	1375	16523	Kcnj8	142573301	92.3562216791447	1.52864557799156	0.256845096248634	5.95162454069896	2.6549387883988e-09	3.32151731043715e-08	gained-open
Peak_3071	chr1	106931364	106931841	478	106934449	106957080	upstream	2607	71869	Serpinb12	106931841	47.2445850456774	2.01542235651312	0.338815171310065	5.948441885646	2.70706965153136e-09	3.3809245076274e-08	gained-open
Peak_86134	chr8	111642653	111642778	126	111643443	111671011	upstream	664	22640	Zfp1	111642778	53.4578229617019	-1.73796592732114	0.292509064336872	-5.94157972937068	2.8228838110966e-09	3.50935277046787e-08	gained-close
Peak_498	chr1	34579551	34579896	346	34579693	34590944	overlapStart	0	211383	Amer3	34579896	31.8314974220859	-2.2342726554675	0.376385452330797	-5.93612915066612	2.9182994660531e-09	3.61678454618065e-08	gained-close
Peak_86434	chr8	119696878	119697610	733	119700009	119757718	upstream	2398	69047	Atp2c2	119697610	63.6503868645561	1.72406426763862	0.290584578783467	5.93308934306292	2.97286969234033e-09	3.67603201262894e-08	gained-open
Peak_77660	chr7	25301115	25301327	213	25295049	25297955	upstream	3159	18476	Pafah1b3	25301327	47.6705487338216	-2.15751492201719	0.363672556053979	-5.93257557135259	2.98219048917456e-09	3.68512426095674e-08	gained-close
Peak_77660	chr7	25301115	25301327	213	25301359	25304133	upstream	31	623131	Prr19	25301327	47.6705487338216	-2.15751492201719	0.363672556053979	-5.93257557135259	2.98219048917456e-09	3.68512426095674e-08	gained-close
Peak_39219	chr17	28575411	28575913	503	28575719	28583593	overlapStart	0	328789	Lhfpl5	28575913	75.9427172802511	-1.55013621579437	0.261532073571794	-5.92713618113398	3.08263326854366e-09	3.79981241698817e-08	gained-close
Peak_1099	chr1	52964551	52964838	288	52925127	52963260	upstream	1290	67080	1700019D03Rik	52964838	27.6318809179934	-2.43968554780459	0.411965240559502	-5.92206649398669	3.17921017097506e-09	3.90714935613492e-08	gained-close
Peak_86025	chr8	109777734	109778018	285	109778583	109864210	upstream	564	11765	Ap1g1	109778018	72.3416238042401	1.54749292144288	0.261309573993853	5.92206744586896	3.1791917641418e-09	3.90714935613492e-08	gained-open
Peak_13138	chr11	53320026	53320219	194	53324689	53333301	upstream	4469	67966	Zcchc10	53320219	44.0326298050384	-1.91990473852827	0.324499541853602	-5.91650985872404	3.2884477105344e-09	4.02883817796966e-08	gained-close
Peak_58017	chr3	90523355	90523614	260	90526849	90528837	upstream	3234	66166	S100a14	90523614	29.0032230419157	2.67681616079262	0.45285633168213	5.9109611007306	3.40117353308854e-09	4.15725353063792e-08	gained-open
Peak_21401	chr12	102442816	102442925	110	102394098	102439697	upstream	3118	19141	Lgmn	102442925	40.2552778218796	-2.03787514135615	0.344886120627987	-5.90883488626762	3.44535815815101e-09	4.20653080898709e-08	gained-close
Peak_14406	chr11	72363961	72364434	474	72344717	72362442	upstream	1518	21689	Tekt1	72364434	41.4819550444372	-2.03728000821935	0.345022937696857	-5.90476685932499	3.53145800894717e-09	4.3037114053131e-08	gained-close
Peak_5692	chr1	180903090	180903232	143	180904274	180908088	upstream	1041	69051	Pycr2	180903232	42.3714080001485	-1.91999223226447	0.326097982912287	-5.88777708809348	3.91424567248662e-09	4.73785985275421e-08	gained-close
Peak_52443	chr2	119172051	119172193	143	119174509	119177575	upstream	2315	623781	Gm14137	119172193	40.637214379157	-2.29906316287619	0.391379082589044	-5.87426172003742	4.24731907495708e-09	5.10185206202882e-08	gained-close
Peak_26794	chr13	119759883	119760302	420	119710094	119755882	upstream	4000	245269	Nim1k	119760302	40.1062185798619	2.07366684563028	0.353129083200112	5.87226298904179	4.29886056906608e-09	5.15721535629046e-08	gained-open
Peak_65942	chr5	3895905	3896172	268	3890581	3893933	upstream	1971	545725	Mterf1a	3896172	78.7498670985548	1.87468643157959	0.319729604170247	5.86334955264689	4.53621862391861e-09	5.42271290288658e-08	gained-open
Peak_21486	chr12	104213893	104214677	785	104214544	104221129	overlapStart	0	238393	Serpina3f	104214677	97.8682993611662	-1.6231554846046	0.277221582184091	-5.85508340229705	4.76770694318672e-09	5.67720180071898e-08	gained-close
Peak_86730	chr8	122418482	122419193	712	122422085	122423639	upstream	2891	234836	Il17c	122419193	62.4050354382668	1.95782454981464	0.334539003235186	5.85230580255619	4.84804167722694e-09	5.76487972493379e-08	gained-open
Peak_69254	chr5	112900559	112901022	464	112688876	112896362	upstream	4196	74376	Myo18b	112901022	32.2805870049321	2.41194639514009	0.412237060397923	5.85087229375227	4.89001588311656e-09	5.80822150204803e-08	gained-open
Peak_37839	chr16	96087065	96087218	154	95992092	96082428	upstream	4636	93871	Brwd1	96087218	49.7888822985145	-1.77692674495532	0.303905259010095	-5.84697596462553	5.00589802046183e-09	5.93468656796756e-08	gained-close
Peak_91512	chr9	107924095	107924242	148	107928469	107932461	upstream	4226	67722	Actl11	107924242	32.4796316686345	-2.20334241212395	0.377014391283057	-5.84418649013776	5.09049753415268e-09	6.02197037954115e-08	gained-close
Peak_22701	chr13	14040318	14040545	228	13997951	14039638	upstream	679	70430	Tbce	14040545	68.0368526680813	-1.53036008249017	0.261919792242095	-5.84285772903959	5.13128393050808e-09	6.06585339909594e-08	gained-close
Peak_52448	chr2	119203817	119204145	329	119208720	119217050	upstream	4574	72008	Zfyve19	119204145	73.4536201611873	1.91789540720052	0.330297122108868	5.80657619707741	6.37632613457687e-09	7.39444361715836e-08	gained-open
Peak_1844	chr1	74305020	74305150	131	74288247	74304336	upstream	683	69660	Tmbim1	74305150	40.9991925098195	2.15142062136137	0.370789372226081	5.80227153881203	6.54225003618182e-09	7.57201011650376e-08	gained-open
Peak_45493	chr19	9140436	9140658	223	9111719	9135566	upstream	4869	66514	Asrgl1	9140658	68.2490300410711	-1.59318264386516	0.275317206659832	-5.78671657755709	7.1775528902392e-09	8.25078455326816e-08	gained-close
Peak_28470	chr14	55765720	55766233	514	55765962	55768492	overlapStart	0	16995	Ltb4r1	55766233	135.042425942611	1.54801228718397	0.267771829804658	5.78108716033818	7.4219422878269e-09	8.5017589548632e-08	gained-open
Peak_68050	chr5	74704512	74704948	437	74592447	74702903	upstream	1608	16924	Lnx1	74704948	74.0368612552524	-1.50560168776843	0.260495671379067	-5.77975702935009	7.48085839390652e-09	8.56198994935785e-08	gained-close
Peak_14056	chr11	68555438	68555779	342	68556186	68558245	upstream	406	215723	Mfsd6l	68555779	25.481047641272	2.79528402832891	0.483828155649409	5.77743150267267	7.58495844632283e-09	8.67378917892926e-08	gained-open
Peak_70659	chr5	136104621	136104788	168	136105522	136105603	upstream	733	102465626	Mir7035	136104788	39.2204192529257	-2.12268352290564	0.367844851314123	-5.77059462793178	7.89922915583948e-09	9.00270417440489e-08	gained-close
Peak_52336	chr2	118302277	118302898	622	118304914	118308166	upstream	2015	73358	1700054M17Rik	118302898	38.7861962070936	2.04527182887763	0.354472160970879	5.76990820174917	7.9314726998153e-09	9.03618625046636e-08	gained-open
Peak_58543	chr3	100161164	100161331	168	100162463	100206989	upstream	1131	14547	Gdap2	100161331	35.6947152211871	2.20456447905223	0.382805555894575	5.75896677857877	8.46303548921477e-09	9.58522609233393e-08	gained-open
Peak_15888	chr11	94654823	94655026	204	94645002	94653754	upstream	1068	268465	Eme1	94655026	35.8123094485839	2.20469435697109	0.382998487317451	5.75640486836626	8.59241673155539e-09	9.7189643388992e-08	gained-open
Peak_45751	chr19	12572127	12572265	139	12573525	12589696	upstream	1259	107373	Fam111a	12572265	43.7768692559832	-2.00167830488621	0.347797081777353	-5.75530506080442	8.64854716424723e-09	9.77310622337283e-08	gained-close
Peak_65100	chr4	141611755	141612015	261	141614370	141615604	upstream	2354	100165	AI507597	141612015	36.0465387952383	2.14945739735635	0.374245761050237	5.74343819239095	9.27732366160883e-09	1.0415218729443e-07	gained-open
Peak_25265	chr13	70567782	70568492	711	70573241	70576104	upstream	4748	73584	1700100L14Rik	70568492	73.4838860494506	1.82485841479957	0.318446727545241	5.73049824963364	1.00136061061033e-08	1.11715473970992e-07	gained-open
Peak_87290	chr8	128278358	128278762	405	128278148	128278225	upstream	132	102465212	Mir21c	128278762	27.9869211358598	-2.32047559887521	0.405085644425387	-5.72835801714671	1.01407375639997e-08	1.12987235658904e-07	gained-close
Peak_73129	chr6	51432559	51432895	337	51432670	51458768	overlapStart	0	18025	Nfe2l3	51432895	48.8375285817582	-1.97272021505338	0.345027683208859	-5.71757082419156	1.08057642319442e-08	1.19762199030848e-07	gained-close
Peak_59590	chr3	129429182	129429702	521	129433673	129434712	upstream	3970	435755	Pou5f1-rs4	129429702	72.4023526584056	1.54502402021645	0.270608011687439	5.709454094068	1.13339121626388e-08	1.25131998373043e-07	gained-open
Peak_71171	chr5	141000367	141000649	283	140872999	141000596	overlapStart	0	108723	Card11	141000649	43.9176278404715	1.86626163441161	0.326969094978052	5.70776156852649	1.14471622329919e-08	1.26279177963436e-07	gained-open
Peak_80641	chr7	103253841	103254243	403	103250086	103252505	upstream	1335	384701	Usp17ld	103254243	27.7499702717624	-2.41607302078491	0.423843233376623	-5.70039304753514	1.19531506948845e-08	1.31264048130034e-07	gained-close
Peak_50649	chr2	61578461	61578813	353	61578586	61654171	overlapStart	0	21353	Tank	61578813	47.6303909827526	2.12777101390097	0.373818032147666	5.69199672278105	1.2556226468852e-08	1.37281215914967e-07	gained-open
Peak_42084	chr18	4634805	4635123	319	4634929	4682869	overlapStart	0	240185	Jcad	4635123	23.0971052826443	-2.66799709937884	0.468776165897953	-5.69140944755206	1.25994969743035e-08	1.37690656203183e-07	gained-close
Peak_62061	chr4	63541061	63541393	333	63544765	63550701	upstream	3371	66290	Atp6v1g1	63541393	66.3427322511621	1.54172267038668	0.271967335358519	5.66877881990613	1.43818880300623e-08	1.554275644245e-07	gained-open
Peak_52052	chr2	103955059	103955306	248	103957995	103981878	upstream	2688	16909	Lmo2	103955306	25.1440039969278	2.97897783975509	0.526394939902239	5.65920683110734	1.52074189939708e-08	1.63341630488602e-07	gained-open
Peak_59934	chr3	138520967	138521309	343	138526191	138559696	upstream	4881	13684	Eif4e	138521309	44.2566683831065	2.01205661383878	0.35554979608739	5.65900089377142	1.52256762560884e-08	1.63519165385798e-07	gained-open
Peak_16952	chr11	106350862	106351177	316	106318593	106349390	upstream	1471	110880	Scn4a	106351177	45.0277549719543	-1.81593035958894	0.320963981303525	-5.65773876624393	1.53380354454273e-08	1.64595075017026e-07	gained-close
Peak_54706	chr2	164022212	164022378	167	164025224	164050538	upstream	2845	381404	Pabpc1l	164022378	38.7272006211996	-1.95071260815755	0.344875543255792	-5.65627991402892	1.54689113876649e-08	1.65867826220268e-07	gained-close
Peak_75850	chr6	125067359	125067571	213	125067920	125082472	upstream	348	381810	Lpar5	125067571	82.7671315635141	1.64564984351589	0.291037394631158	5.65442748551775	1.5636659524069e-08	1.67438801463958e-07	gained-open
Peak_48540	chr2	14224316	14224704	389	14229414	14332023	upstream	4709	17533	Mrc1	14224704	109.750651844214	-1.55699110753596	0.275728419822249	-5.64682852982543	1.6343469099655e-08	1.74454500467331e-07	gained-close
Peak_44248	chr18	74017569	74017989	421	74017907	74020088	overlapStart	0	77855	D730045A05Rik	74017989	41.4507487453113	-1.8808929361236	0.333154958847059	-5.64569995485813	1.6451054173795e-08	1.75543472949025e-07	gained-close
Peak_57979	chr3	90102612	90103383	772	90104132	90212017	upstream	748	77595	Nup210l	90103383	64.8300282606063	1.7814642200237	0.315702089694857	5.64286483420362	1.67243643808217e-08	1.78078246101521e-07	gained-open
Peak_36619	chr16	44866802	44867228	427	44867097	44915840	overlapStart	0	271375	Cd200r2	44867228	46.0378032731604	1.91312402597512	0.339209359823033	5.63995058088376	1.70098976543629e-08	1.80835317570634e-07	gained-open
Peak_91220	chr9	103234484	103234909	426	103208876	103230286	upstream	4197	22041	Trf	103234909	91.0889208471755	1.77713918921071	0.315205995937458	5.63802469532759	1.7201184544503e-08	1.82661944664637e-07	gained-open
Peak_33004	chr15	79895764	79895961	198	79889532	79893138	upstream	2625	109361	D730005E14Rik	79895961	48.5663216180051	-1.68630594568511	0.299438053571135	-5.63156861853066	1.78577898155269e-08	1.88998105301234e-07	gained-close
Peak_23141	chr13	23868867	23869413	547	23869018	23895730	overlapStart	0	20504	Slc17a1	23869413	44.0035606936853	-2.15143435587324	0.382208916062017	-5.62894863374709	1.81311378066448e-08	1.9162254736328e-07	gained-close
Peak_9113	chr10	79666094	79666344	251	79669410	79676126	upstream	3065	110012	Tpgs1	79666344	69.4965971079286	1.55429903484063	0.276186612164769	5.62771317066359	1.82614415130922e-08	1.92817180333438e-07	gained-open
Peak_44803	chr18	84933821	84934334	514	84935025	84981392	upstream	690	50764	Fbxo15	84934334	46.9171424419884	1.96749330264165	0.349860772330462	5.62364648524599	1.86968075380387e-08	1.97084141943586e-07	gained-open
Peak_244	chr1	17145298	17145710	413	17145373	17164271	overlapStart	0	14545	Gdap1	17145710	58.2998772634702	-1.54455975497819	0.274727277306308	-5.62215652600116	1.88588268297039e-08	1.98659188403403e-07	gained-close
Peak_81374	chr7	122071608	122071743	136	122034162	122067086	upstream	4521	67417	Ears2	122071743	48.7111535480686	1.75316815840186	0.311907572216324	5.62079383307163	1.90082000625171e-08	2.00054486051229e-07	gained-open
Peak_38155	chr17	6892887	6893242	356	6895940	6901717	upstream	2697	73617	1700122H20Rik	6893242	55.4041184225816	-1.71197141248164	0.304641371295151	-5.61962876284127	1.91368210587414e-08	2.01229086704822e-07	gained-close
Peak_83119	chr8	13432078	13432295	218	13435459	13461452	upstream	3163	272465	Tmem255b	13432295	28.4781813346223	-2.30655990497944	0.410461741262254	-5.61942727691572	1.9159150168655e-08	2.01441493760367e-07	gained-close
Peak_3722	chr1	134182073	134182602	530	134182404	134190031	overlapStart	0	12654	Chil1	134182602	44.6030550231091	2.22297009806446	0.396193530492475	5.61081877157679	2.01371565248023e-08	2.106940754463e-07	gained-open
Peak_61251	chr4	43502248	43502434	187	43496142	43499660	upstream	2587	230098	Arhgef39	43502434	46.5445547812098	1.79467876708483	0.320173403016967	5.60533370409198	2.07854104689255e-08	2.16939749233402e-07	gained-open
Peak_61251	chr4	43502248	43502434	187	43507026	43513725	upstream	4591	230099	Car9	43502434	46.5445547812098	1.79467876708483	0.320173403016967	5.60533370409198	2.07854104689255e-08	2.16939749233402e-07	gained-open
Peak_46368	chr19	29521136	29521293	158	29522282	29605921	upstream	988	226089	Ric1	29521293	51.6128265559066	1.69819750519509	0.303046512154316	5.60375202183596	2.09760751526295e-08	2.18697659895269e-07	gained-open
Peak_36426	chr16	36930868	36931288	421	36934983	36963214	upstream	3694	15163	Hcls1	36931288	87.66178685917	1.6526209013403	0.294914467195716	5.60372950521809	2.09788016493763e-08	2.18701984445277e-07	gained-open
Peak_89422	chr9	59702792	59703027	236	59707637	59716424	upstream	4609	546134	Gramd2	59703027	31.2218676311601	-2.21284473604885	0.395483606427411	-5.59528814870108	2.20255649112075e-08	2.28656929001393e-07	gained-close
Peak_60924	chr4	32950583	32951158	576	32804035	32950826	overlapStart	0	140577	Ankrd6	32951158	59.8376559289695	-1.55056564448611	0.27723714394038	-5.59292172198815	2.23279972685493e-08	2.31618696226795e-07	gained-close
Peak_48415	chr2	11641279	11641644	366	11642792	11693194	upstream	1147	16184	Il2ra	11641644	49.5649024819141	-1.67326684414568	0.299645463119085	-5.5841554439978	2.34838594832816e-08	2.42412876189344e-07	gained-close
Peak_14608	chr11	75422398	75422892	495	75410029	75422623	overlapStart	0	20317	Serpinf1	75422892	40.6141160192603	-1.90945471391141	0.34233036872873	-5.57781280405335	2.43561549439648e-08	2.50487922016386e-07	gained-close
Peak_63437	chr4	120666389	120666711	323	120666563	120667820	overlapStart	0	56222	Cited4	120666711	53.3705904206595	-1.74116238244669	0.312408947286072	-5.57334352159994	2.49896115322324e-08	2.56528557792793e-07	gained-close
Peak_83974	chr8	41138542	41138896	355	40990912	41133726	upstream	4815	102103	Mtus1	41138896	51.988686025396	1.76755964687745	0.317310231526779	5.57044643147058	2.54087431552151e-08	2.60463707329318e-07	gained-open
Peak_51636	chr2	91727087	91727287	201	91730138	91918849	upstream	2850	228361	Ambra1	91727287	60.7534368909807	1.57537477368932	0.283260246715562	5.56158088526713	2.67341718032609e-08	2.7316265877733e-07	gained-open
Peak_22746	chr13	16007821	16008007	187	16011851	16027211	upstream	3843	16323	Inhba	16008007	27.0453958879354	2.82450707554651	0.508841028049438	5.55086347178767	2.84262027696118e-08	2.89077645837031e-07	gained-open
Peak_29447	chr14	73021472	73021760	289	73025603	73026890	upstream	3842	668489	Gm9199	73021760	30.1067786340444	2.29805382548367	0.414534077000372	5.543703046352	2.96140901598075e-08	2.99932621096108e-07	gained-open
Peak_55193	chr2	168010976	168011180	205	167980786	168010593	upstream	382	69553	Ripor3	168011180	374.731811834916	-2.45507387801112	0.44291702099075	-5.54296575128096	2.97391046847322e-08	3.0100542824476e-07	gained-close
Peak_18184	chr11	121388268	121388547	280	121356121	121388251	upstream	16	217371	Rab40b	121388547	26.944416893295	-2.31840692084812	0.419453406305955	-5.52720966380004	3.25364044433192e-08	3.26143153079535e-07	gained-close
Peak_71537	chr5	147188590	147189014	425	147188696	147190947	overlapStart	0	14842	Gsx1	147189014	51.5193578986825	-1.69803811314289	0.307308686876728	-5.52551289844935	3.28524439499884e-08	3.2899738671881e-07	gained-close
Peak_3091	chr1	107528073	107528965	893	107529003	107549271	upstream	37	241197	Serpinb10	107528965	58.3003236885346	1.73699823649168	0.314625187478402	5.52084926961201	3.37365088222653e-08	3.36994631363027e-07	gained-open
Peak_59741	chr3	133094775	133094981	207	132982550	133092033	upstream	2741	67553	Gstcd	133094981	52.886235442749	1.71605058376174	0.311042169834352	5.51709944884849	3.44640428687798e-08	3.43572733366046e-07	gained-open
Peak_90096	chr9	70008917	70009115	199	70012548	70022866	upstream	3432	235459	Gtf2a2	70009115	20.7053811482273	3.02381466767643	0.548724510720832	5.51062438181264	3.57563032508936e-08	3.55047996789708e-07	gained-open
Peak_71234	chr5	142701794	142702339	546	142702101	142722490	overlapStart	0	243328	Slc29a4	142702339	49.1505635672149	-1.69214482092042	0.30729670509728	-5.50655048639307	3.65933054220006e-08	3.62583394716568e-07	gained-close
Peak_33485	chr15	85704153	85704318	166	85706603	85706697	upstream	2284	723966	Mirlet7c-2	85704318	23.3363172433984	-2.55084732544146	0.463430974183858	-5.50426593719535	3.70709609338092e-08	3.66740074255355e-07	gained-close
Peak_49039	chr2	26502377	26502715	339	26503927	26505347	upstream	1211	102639736	Gm35978	26502715	53.5752984199424	1.63853572501352	0.297903146205637	5.50022967492419	3.79296852887361e-08	3.74374106043419e-07	gained-open
Peak_77181	chr7	16129512	16129922	411	16130300	16160511	upstream	377	110891	Slc8a2	16129922	50.6927362300608	-1.62196005832763	0.295031918021549	-5.49757486987953	3.85049850289205e-08	3.79498136644031e-07	gained-close
Peak_75361	chr6	116465747	116466155	409	116410071	116461178	upstream	4568	11689	Alox5	116466155	23.6345306553767	2.66370104948092	0.484551719054974	5.49724816718423	3.85763639927632e-08	3.80162030406182e-07	gained-open
Peak_67099	chr5	35893204	35893494	291	35893319	36003922	overlapStart	0	70292	Afap1	35893494	37.5300493685857	-2.00857075901105	0.365598441640645	-5.49392593140569	3.93095411707917e-08	3.86782990328021e-07	gained-close
Peak_11265	chr10	130280121	130280367	247	130268152	130280240	overlapStart	0	11923	Neurod4	130280367	46.1925796696109	-1.98507032254691	0.361757634505595	-5.48729351699751	4.08138656663076e-08	4.00252573362361e-07	gained-close
Peak_38896	chr17	25949865	25950092	228	25942233	25944931	upstream	4933	621239	Nhlrc4	25950092	28.1764138400736	-2.31751363642269	0.423298057834684	-5.47489787285483	4.37764004712847e-08	4.26432263487063e-07	gained-close
Peak_28177	chr14	50357517	50357939	423	50357914	50363663	overlapStart	0	239081	Tlr11	50357939	45.6485604736732	1.85536987774198	0.339231747374276	5.46932854045334	4.51743692762267e-08	4.38469927131087e-07	gained-open
Peak_9020	chr10	77972299	77972447	149	77907722	77969872	upstream	2426	28240	Trpm2	77972447	43.9449564280632	-1.81550326989039	0.332107162330367	-5.46661883818212	4.5870093921729e-08	4.44675284922542e-07	gained-close
Peak_72078	chr6	17459608	17460022	415	17463957	17573980	upstream	3934	17295	Met	17460022	76.4001371794306	1.51186752903371	0.276983828631388	5.45832417908306	4.80649494159118e-08	4.63861328617949e-07	gained-open
Peak_35840	chr16	28931506	28931924	419	28826176	28929698	upstream	1807	239796	Mb21d2	28931924	19.7600683444808	3.38164242403577	0.620964337411182	5.44579168287496	5.15754698835881e-08	4.9396121723089e-07	gained-open
Peak_34680	chr16	5881907	5882115	209	5884793	7412480	upstream	2677	268859	Rbfox1	5882115	43.3511195470453	-1.71200170145325	0.314381954595162	-5.44561059065187	5.16279741919534e-08	4.94313948629081e-07	gained-close
Peak_49267	chr2	28841642	28841993	352	28822299	28840360	upstream	1281	269252	Gtf3c4	28841993	71.1593814318036	1.50075461375667	0.275649109625821	5.44443845943805	5.19690667007183e-08	4.97126948866346e-07	gained-open
Peak_64977	chr4	140774035	140774294	260	140745508	140774203	overlapStart	0	18602	Padi4	140774294	32.8279042562198	2.10263210239228	0.386349123748105	5.4423110423907	5.25937370903103e-08	5.02594251632918e-07	gained-open
Peak_34001	chr15	98780208	98780387	180	98771752	98778150	upstream	2057	22410	Wnt10b	98780387	45.9668094118962	-1.72307179429661	0.316736564479577	-5.44007856222015	5.32570807114129e-08	5.0821458319386e-07	gained-close
Peak_52439	chr2	119160056	119160178	123	119136998	119157034	upstream	3021	67809	Rmdn3	119160178	50.2012133639505	-1.69721222144063	0.312016292982125	-5.43949870444062	5.34306978086894e-08	5.09423437550322e-07	gained-close
Peak_83339	chr8	22641617	22642137	521	22634371	22636809	upstream	4807	68074	A930013F10Rik	22642137	45.100830047019	1.81240811057044	0.334344839842761	5.42077488446599	5.93412483739087e-08	5.60842971394806e-07	gained-open
Peak_57025	chr3	59262816	59263096	281	59216271	59262831	overlapStart	0	70839	P2ry12	59263096	39.580772670573	1.87532025200783	0.346920344577734	5.40562201473205	6.45838673042565e-08	6.06273204027237e-07	gained-open
Peak_23361	chr13	30952022	30952368	347	30946576	30947761	upstream	4260	210554	Hus1b	30952368	32.4645218032861	2.49993972220726	0.462499192934817	5.40528450729554	6.47056020429929e-08	6.07295455047558e-07	gained-open
Peak_72835	chr6	42376203	42376582	380	42358487	42373268	upstream	2934	13835	Epha1	42376582	37.0290096998182	1.91527815715615	0.35492154997436	5.3963422544912	6.80131529824948e-08	6.35375960408996e-07	gained-open
Peak_45679	chr19	11628196	11628375	180	11615520	11623719	upstream	4476	14126	Ms4a2	11628375	15.0135396358487	-5.10582476375656	0.946415414299883	-5.39490871197784	6.85583996955715e-08	6.39900943330627e-07	gained-close
Peak_55340	chr2	172369114	172369289	176	172370697	172381086	upstream	1407	67337	Cstf1	172369289	49.3762837876245	1.66113882150414	0.308000185797364	5.39330460857909	6.91735392352402e-08	6.45069675001393e-07	gained-open
Peak_70785	chr5	137072135	137072386	252	137061504	137072272	overlapStart	0	18787	Serpine1	137072386	43.6858540214601	-1.68715207993675	0.31282709705927	-5.39324149281446	6.91978517853946e-08	6.452327977537e-07	gained-close
Peak_15245	chr11	83043931	83044100	170	83028123	83040533	upstream	3397	237887	Slfn10-ps	83044100	38.9796412311941	2.06006200565852	0.383799018507314	5.36755412682031	7.98115605399954e-08	7.34284984581037e-07	gained-open
Peak_56323	chr3	30855030	30855145	116	30855950	30897194	upstream	804	71862	Gpr160	30855145	38.826873335412	-1.8332488605844	0.342466673734749	-5.35307228756603	8.64732831060684e-08	7.89204266017047e-07	gained-close
Peak_39630	chr17	32503104	32503671	568	32506462	32528894	upstream	2790	208285	Cyp4f17	32503671	38.3679932528049	1.92954889149718	0.361053653769909	5.34421649344902	9.08089826030981e-08	8.25192261223737e-07	gained-open
Peak_78051	chr7	30117948	30118197	250	30121948	30135032	upstream	3750	233060	Zfp382	30118197	65.8687604730043	-1.67722858192221	0.314046660529575	-5.34069866908921	9.25890471424886e-08	8.40076665767937e-07	gained-close
Peak_86838	chr8	123116660	123117126	467	123117374	123135185	upstream	247	102278	Cpne7	123117126	30.3141548138229	-2.11733494783252	0.397409515160539	-5.32784160182271	9.93867381498252e-08	8.96081363709365e-07	gained-close
Peak_91946	chr9	114785524	114785631	108	114756836	114781993	upstream	3530	102545	Cmtm7	114785631	58.1478699053885	-1.57337346697614	0.295315487890034	-5.32777159172231	9.94250437907374e-08	8.96341308639842e-07	gained-close
Peak_75118	chr6	113704038	113704481	444	113707208	113707265	upstream	2726	102465631	Mir7042	113704481	45.9065849050924	1.67262127936979	0.314530493111131	5.31783504621542	1.05009200814487e-07	9.41480330956726e-07	gained-open
Peak_88798	chr9	48983880	48984014	135	48985385	49042517	upstream	1370	235323	Usp28	48984014	74.0421620258369	-1.54152979497607	0.289958505989589	-5.31638066527841	1.05851587580037e-07	9.48583432281616e-07	gained-close
Peak_81431	chr7	122670776	122671108	333	122671744	122769393	upstream	635	54376	Cacng3	122671108	60.4257572379492	-1.54874520067831	0.291448547326748	-5.31395752315068	1.07269633370829e-07	9.60472358004981e-07	gained-close
Peak_70762	chr5	136917449	136917654	206	136919146	136937109	upstream	1491	66752	4933404O12Rik	136917654	29.5967444034552	-2.13233069028302	0.401579729504681	-5.3098563837201	1.09711652923874e-07	9.79648951063333e-07	gained-close
Peak_35558	chr16	23030159	23030522	364	22985852	23029101	upstream	1057	385643	Kng2	23030522	36.171850426631	-1.81451381585996	0.343592715242438	-5.28100199848428	1.28479289034014e-07	1.13369749683556e-06	gained-close
Peak_5226	chr1	171608477	171608817	341	171588613	171607410	upstream	1066	17085	Ly9	171608817	50.2310351928362	1.77551174956686	0.336559522738208	5.27547619250678	1.32411801470582e-07	1.16486431931615e-06	gained-open
Peak_38571	chr17	17883741	17883953	213	17887824	17971677	upstream	3870	14289	Fpr2	17883953	20.6882969630383	5.75810066638116	1.09230222989616	5.2715269719156	1.35293400617815e-07	1.18734392011586e-06	gained-open
Peak_38571	chr17	17883741	17883953	213	17876471	17883939	overlapStart	0	14293	Fpr1	17883953	20.6882969630383	5.75810066638116	1.09230222989616	5.2715269719156	1.35293400617815e-07	1.18734392011586e-06	gained-open
Peak_76421	chr6	137732989	137733137	149	137735082	137751930	upstream	1944	20901	Strap	137733137	36.8809165891633	1.8736259594973	0.355435749157882	5.27134922116416	1.35424515215721e-07	1.18827413156172e-06	gained-open
Peak_58873	chr3	106221676	106222015	340	106201491	106219479	upstream	2196	104183	Chil4	106222015	40.5797881971684	1.95705822992575	0.371936579506949	5.2618062803075	1.42647019575548e-07	1.24380312755431e-06	gained-open
Peak_28233	chr14	51162092	51162239	148	51162260	51163018	upstream	20	54159	Rnase2b	51162239	21.2334698502316	2.84049492381837	0.541010454063207	5.25035126860323	1.51809437164395e-07	1.31653530226187e-06	gained-open
Peak_83341	chr8	22657992	22658306	315	22628119	22653437	upstream	4554	18970	Polb	22658306	27.9355246556227	2.23308303709169	0.425397323425765	5.24940547135666	1.52590876064933e-07	1.32258473852488e-06	gained-open
Peak_50675	chr2	62575111	62575288	178	62500936	62574021	upstream	1089	14089	Fap	62575288	25.0598353717532	-2.27111410441478	0.432835732084974	-5.24705780059978	1.54547423325362e-07	1.33770480614082e-06	gained-close
Peak_43120	chr18	38604521	38604675	155	38586265	38601268	upstream	3252	24066	Spry4	38604675	31.6865821204553	-1.91842668673914	0.367462740832986	-5.22073797846916	1.78211536203003e-07	1.5232996561277e-06	gained-close
Peak_72788	chr6	40623506	40624106	601	40628831	40769123	upstream	4724	232714	Mgam	40624106	30.7041857550655	2.15954095311445	0.413951987544157	5.2168875089266	1.81954685390091e-07	1.55220964526736e-06	gained-open
Peak_80745	chr7	106810798	106811146	349	106805510	106806460	upstream	4337	258593	Olfr700	106811146	25.8391338029782	2.49000945536932	0.477344433155863	5.21637895493436	1.82454711210964e-07	1.55563359848814e-06	gained-open
Peak_80745	chr7	106810798	106811146	349	106814129	106820709	upstream	2982	66786	Olfr701	106811146	25.8391338029782	2.49000945536932	0.477344433155863	5.21637895493436	1.82454711210964e-07	1.55563359848814e-06	gained-open
Peak_63048	chr4	109973527	109973963	437	109978025	109983684	upstream	4061	242620	Dmrta2	109973963	24.6098189805839	2.6161211998578	0.502467470617752	5.20654838937423	1.92385542615632e-07	1.63250754728626e-06	gained-open
Peak_91744	chr9	110833153	110833323	171	110834588	110841310	upstream	1264	260408	Prss45	110833323	28.5908429210681	-2.02843409675814	0.389629316078246	-5.20606128197701	1.92890967317363e-07	1.63620934762185e-06	gained-close
Peak_75622	chr6	121134948	121135266	319	120931546	121131022	upstream	3925	194401	Mical3	121135266	41.7261143086808	1.77369579474121	0.341609040023436	5.19218049563187	2.07845355388456e-07	1.75305070443916e-06	gained-open
Peak_4093	chr1	144250483	144250723	241	144244669	144249104	upstream	1378	50778	Rgs1	144250723	29.7838829433097	2.45966464553174	0.474249055858029	5.18644078496187	2.14351136214401e-07	1.8022488084518e-06	gained-open
Peak_27941	chr14	44102521	44102803	283	44102654	44103531	overlapStart	0	13587	Ear2	44102803	46.6358975264586	1.78111225169163	0.343575897676259	5.18404307094301	2.17126756564783e-07	1.82250855572423e-06	gained-open
Peak_27941	chr14	44102521	44102803	283	44102887	44103357	upstream	83	503845	Ear12	44102803	46.6358975264586	1.78111225169163	0.343575897676259	5.18404307094301	2.17126756564783e-07	1.82250855572423e-06	gained-open
Peak_6918	chr10	18407532	18407746	215	18407638	18533892	overlapStart	0	215819	Nhsl1	18407746	26.4625967984194	-2.10078670505177	0.405634514693464	-5.17901369078351	2.23062100725359e-07	1.8663932353559e-06	gained-close
Peak_25203	chr13	67378032	67378537	506	67363584	67375763	upstream	2268	408065	Zfp456	67378537	37.4506394262931	1.89768918984299	0.366704491795033	5.17498212403597	2.27932802769051e-07	1.90310734803042e-06	gained-open
Peak_46795	chr19	38093452	38093711	260	38097079	38114263	upstream	3367	107221	Ffar4	38093711	23.4595247756025	2.46419305700534	0.476202931343221	5.17467007196831	2.28314060953479e-07	1.90559153511821e-06	gained-open
Peak_53085	chr2	129311624	129311947	324	129299610	129309972	upstream	1651	16175	Il1a	129311947	66.6580476091815	1.76928377886103	0.343232633837573	5.15476561502687	2.53948365082849e-07	2.10082537836901e-06	gained-open
Peak_53921	chr2	152080616	152081159	544	152081529	152095802	upstream	369	545474	Scrt2	152081159	56.1076903625148	1.63066310585952	0.316589965120351	5.15071002089289	2.59502154103292e-07	2.14115304300506e-06	gained-open
Peak_36713	chr16	48872487	48872911	425	48872608	48874498	overlapStart	0	245195	Retnlg	48872911	28.2283518284769	2.78809561215924	0.541591041924843	5.14797217149346	2.63317544660275e-07	2.16847315721884e-06	gained-open
Peak_31094	chr15	34448589	34448707	119	34453312	34473892	upstream	4604	239368	Erich5	34448707	25.3371892343952	-2.1581595367428	0.41926463025114	-5.14748772261103	2.63998277259949e-07	2.17332239979593e-06	gained-close
Peak_1714	chr1	71886396	71887053	658	71888112	71891204	upstream	1058	667931	Gm8883	71887053	18.1705759638843	3.10054806716413	0.602360421221149	5.14733033235894	2.64219802777624e-07	2.17495681385016e-06	gained-open
Peak_62806	chr4	106617111	106617382	272	106590909	106617238	overlapStart	0	242602	Lexm	106617382	28.4964261805181	-2.02280534488402	0.395096968324696	-5.1197693403247	3.05909580788135e-07	2.48206533448047e-06	gained-close
Peak_39876	chr17	34804939	34805438	500	34801348	34804426	upstream	512	13079	Cyp21a1	34805438	34.0679645656324	-1.84023997799106	0.359716475199498	-5.11580676690013	3.12402758708265e-07	2.53084221530691e-06	gained-close
Peak_18601	chr12	15800995	15801156	162	15800994	15801101	overlapStart	0	102465204	Mir6387	15801156	14.5804822199368	-3.19202382369383	0.624096397159377	-5.11463267248869	3.1435208027425e-07	2.54487028701551e-06	gained-close
Peak_39728	chr17	33902582	33902829	248	33905135	33906675	upstream	2305	474160	Platr17	33902829	42.7105644137146	1.71474168000605	0.335456283703039	5.11166957755968	3.19323997355698e-07	2.58142200081916e-06	gained-open
Peak_80642	chr7	103254910	103255187	278	103250086	103252505	upstream	2404	384701	Usp17ld	103255187	39.2516704689381	-1.76613715804516	0.346206945877984	-5.10139146274556	3.37165359252271e-07	2.70733882001531e-06	gained-close
Peak_28819	chr14	62329648	62329855	208	62332105	62372992	upstream	2249	67153	Rnaseh2b	62329855	30.6490783686314	2.16247863168421	0.424205267518726	5.09771753739184	3.4377325915381e-07	2.75408696379925e-06	gained-open
Peak_93371	chrX	73639243	73639575	333	73639441	73643514	overlapStart	0	75590	Dusp9	73639575	31.473318768978	-2.05255262586599	0.402743917783673	-5.09642116300931	3.4613461131775e-07	2.77112727750927e-06	gained-close
Peak_41823	chr17	86290472	86290595	124	86285167	86287178	upstream	3293	72104	2010106C02Rik	86290595	27.4761570961212	-2.03185564215882	0.39923292972918	-5.08939892192041	3.59200259416484e-07	2.86395220550844e-06	gained-close
Peak_52604	chr2	121003735	121003856	122	121008408	121016912	upstream	4551	17151	Ccndbp1	121003856	43.7931366676363	-1.65619997408475	0.326118366631628	-5.0785240683961	3.80378250834491e-07	3.01466572827745e-06	gained-close
Peak_54919	chr2	166155077	166155757	681	166073899	166155683	overlapStart	0	72043	Sulf2	166155757	68.9024718800454	1.56806918597948	0.30878545984094	5.07818336649404	3.81060837152899e-07	3.01881105004917e-06	gained-open
Peak_58801	chr3	105054963	105055296	334	105001915	105053146	upstream	1816	80281	Cttnbp2nl	105055296	64.5782046130371	1.55241070132137	0.306117962351976	5.07128261730816	3.95143448982721e-07	3.11914402456899e-06	gained-open
Peak_6640	chr10	9674960	9675804	845	9627259	9675208	overlapStart	0	320825	Samd5	9675804	57.9172534148179	1.85183970584807	0.365768265567027	5.0628769091744	4.129765118586e-07	3.24071465501781e-06	gained-open
Peak_86726	chr8	122365065	122365248	184	122356967	122360746	upstream	4318	170732	Trhr2	122365248	38.0844354011096	-1.72084292047905	0.339972064521633	-5.06171859414511	4.15493990110997e-07	3.25848067770859e-06	gained-close
Peak_59233	chr3	116562846	116563112	267	116562973	116583134	overlapStart	0	109245	Lrrc39	116563112	48.7952475613183	-1.58160313311398	0.31279864573039	-5.05629789227797	4.2747343692983e-07	3.34172467147442e-06	gained-close
Peak_69966	chr5	122418428	122418620	193	122422444	122444912	upstream	3823	56317	Anapc7	122418620	59.1600904045668	-1.55877995149978	0.308555120846955	-5.05186868142418	4.37508464842086e-07	3.41199619362381e-06	gained-close
Peak_52567	chr2	120450799	120450996	198	120455993	120504919	upstream	4996	12335	Capn3	120450996	18.9720451794913	-2.84715775946226	0.565410220638521	-5.0355611829	4.7645091277816e-07	3.68863461982738e-06	gained-close
Peak_63586	chr4	123611335	123611527	193	123616420	123616521	upstream	4892	102465214	Mir6398	123611527	21.7356245124856	2.50842221600922	0.498444689210279	5.0324986308581	4.84128065470906e-07	3.74286342746919e-06	gained-open
Peak_20075	chr12	75636162	75636313	152	75630918	75631749	upstream	4412	665931	Rplp2-ps1	75636313	25.014417707689	-2.09888021021112	0.418010286535244	-5.02112095759194	5.13707954283402e-07	3.9431930809684e-06	gained-close
Peak_75722	chr6	122989829	122990488	660	122990367	123024421	overlapStart	0	474145	Clec4a4	122990488	59.372391074199	1.5053938556799	0.300192318793998	5.01476474057602	5.30983951296734e-07	4.06656421082966e-06	gained-open
Peak_21666	chr12	108848117	108848378	262	108851129	108856815	upstream	2750	104910	Slc25a47	108848378	44.117530410629	1.65803591804067	0.330675604299917	5.01408599993623	5.32861510380691e-07	4.07922634873244e-06	gained-open
Peak_31734	chr15	58393103	58393297	195	58341464	58389274	upstream	3828	69787	Anxa13	58393297	24.5655511433986	-2.13506817247269	0.425949565274993	-5.01249055412063	5.3730013827549e-07	4.10894971155856e-06	gained-close
Peak_45013	chr19	4403095	4403408	314	4316144	4398266	upstream	4828	225876	Kdm2a	4403408	22.601525876378	-2.26265365551686	0.451716299890439	-5.00901485305192	5.47093514060034e-07	4.17843941157372e-06	gained-close
Peak_21164	chr12	99561189	99561467	279	99563841	99620038	upstream	2373	102639404	Gm26839	99561467	42.5994910833577	-1.59479893549605	0.320190819332425	-4.98077658447889	6.33296190817618e-07	4.75996023107107e-06	gained-close
Peak_48457	chr2	12303613	12303815	203	12106660	12301920	upstream	1692	241226	Itga8	12303815	26.7863404864912	2.17402308024297	0.438373121011291	4.95929831470433	7.07482551713531e-07	5.2557592687405e-06	gained-open
Peak_16446	chr11	100393984	100394088	105	100398116	100403865	upstream	4027	102635937	Gm12348	100394088	34.7612577615785	-1.87106057896697	0.37736206563051	-4.95826356006594	7.1126030853308e-07	5.28050637597745e-06	gained-close
Peak_78762	chr7	46841878	46842083	206	46845804	46855627	upstream	3720	16828	Ldha	46842083	74.1662281491543	1.65469633035845	0.334136102749151	4.952162656906	7.33932158797391e-07	5.43390090899874e-06	gained-open
Peak_14613	chr11	75467791	75468102	312	75468050	75470899	overlapStart	0	380712	Tlcd2	75468102	41.3708034375715	1.92555091102336	0.389379114482286	4.94518282929363	7.60724341268882e-07	5.6142512699964e-06	gained-open
Peak_56565	chr3	37726884	37726996	113	37714190	37724360	upstream	2523	381438	Gm5148	37726996	26.0776437723237	-2.01444349078961	0.407576550825777	-4.94249113867864	7.71306121725581e-07	5.68079324147807e-06	gained-close
Peak_34469	chr15	103501317	103501863	547	103503034	103530056	upstream	1170	18574	Pde1b	103501863	37.317357416676	1.85648404703882	0.375833109001785	4.93965008024348	7.82628876153938e-07	5.75704746578178e-06	gained-open
Peak_54573	chr2	160366867	160367280	414	160363677	160367065	overlapStart	0	16658	Mafb	160367280	28.1884920165612	-1.96359410164001	0.398016987486054	-4.93344295187605	8.07926471279737e-07	5.92379227636137e-06	gained-close
Peak_58710	chr3	103796504	103796759	256	103739815	103791563	upstream	4940	15257	Hipk1	103796759	53.5605713366773	-1.59755327654009	0.324225576861908	-4.92728948777693	8.33781772075175e-07	6.08647826612222e-06	gained-close
Peak_72935	chr6	48541993	48542420	428	48536582	48537474	upstream	4518	69432	1700026J14Rik	48542420	29.9645870450776	-1.91749233425556	0.389193584833537	-4.92683438005714	8.35725346208063e-07	6.09878371670472e-06	gained-close
Peak_62598	chr4	99028504	99028819	316	99030954	99046111	upstream	2134	30924	Angptl3	99028819	64.210635786351	-1.54920831763679	0.31467513394828	-4.9231990408604	8.51407755120551e-07	6.2027015309514e-06	gained-close
Peak_56615	chr3	40796163	40796367	205	40799951	40816883	upstream	3583	20873	Plk4	40796367	31.6103479073173	1.87508813034621	0.38091827403046	4.92254706109549	8.54250125446457e-07	6.21957729475046e-06	gained-open
Peak_86733	chr8	122421357	122421781	425	122422085	122423639	upstream	303	234836	Il17c	122421781	39.081240390052	1.94411818627464	0.395044240863578	4.92126700043707	8.59857282614427e-07	6.25558736381271e-06	gained-open
Peak_53281	chr2	131488828	131489164	337	131491862	131525183	upstream	2697	228608	Smox	131489164	53.2965866765139	1.58639297137096	0.322766200590366	4.91499100113121	8.87865376915178e-07	6.43829364204668e-06	gained-open
Peak_1221	chr1	55405679	55406252	574	55405946	55754285	overlapStart	0	227120	Plcl1	55406252	53.504096030226	-1.61295269379061	0.328223334226652	-4.91419264139458	8.91490605883771e-07	6.46187252989887e-06	gained-close
Peak_53852	chr2	150782455	150782626	172	150786796	150831748	upstream	4169	110078	Pygb	150782626	28.8500168635347	1.9676918683989	0.400737276835145	4.91017926742154	9.09931700553773e-07	6.58192510609299e-06	gained-open
Peak_34305	chr15	101487950	101488495	546	101431490	101487983	overlapStart	0	53622	Krt85	101488495	44.7482879911947	2.04221514283758	0.415928652479795	4.91001312523615	9.10702972371434e-07	6.5864968583573e-06	gained-open
Peak_30044	chr14	103046833	103047008	176	103047012	103056573	upstream	3	16365	Acod1	103047008	51.1110529082783	1.77564476738062	0.361743940702312	4.90856809911805	9.1743772751928e-07	6.62962982353261e-06	gained-open
Peak_82601	chr7	143786088	143786350	263	143778363	143784500	upstream	1587	244238	Mrgpre	143786350	52.7857317545382	1.5187175117816	0.309528244320901	4.90655550711903	9.26897658797957e-07	6.69236662659234e-06	gained-open
Peak_9154	chr10	79915298	79915699	402	79916971	79922273	upstream	1271	114229	Kiss1r	79915699	67.0927827259718	1.50418030862535	0.306822488803553	4.90244478001228	9.46512265580931e-07	6.81837656267034e-06	gained-open
Peak_4427	chr1	154251247	154251476	230	154255689	154270416	upstream	4212	75233	4930532M18Rik	154251476	25.4599670542016	-2.04128504960604	0.416431688002212	-4.90184851061381	9.49390381764611e-07	6.83754769010527e-06	gained-close
Peak_77610	chr7	24990449	24990784	336	24987604	24987667	upstream	2781	102465634	Mir7047	24990784	47.9704762531976	1.51015921500853	0.308613177059434	4.89337243923872	9.91225699029207e-07	7.10800412964126e-06	gained-open
Peak_28476	chr14	55793519	55793718	200	55784995	55788857	upstream	4661	56532	Ripk3	55793718	31.3404359841153	1.85103427950403	0.378494825956353	4.89051409045546	1.00572958581843e-06	7.19836988923726e-06	gained-open
Peak_45773	chr19	13159955	13160175	221	13165016	13165954	upstream	4840	258299	Olfr1461	13160175	22.3354855591722	-2.295306575586	0.469469751539967	-4.88914688977697	1.01273907779896e-06	7.24360725744676e-06	gained-close
Peak_92486	chr9	123682383	123682904	522	123636907	123678832	upstream	3550	102680	Slc6a20a	123682904	24.4188324601128	2.60741931514983	0.533442841823337	4.88790758956953	1.01913344997234e-06	7.28131414762164e-06	gained-open
Peak_5237	chr1	171646467	171646778	312	171641840	171641900	upstream	4566	102465784	Mir7683	171646778	17.4646856514853	2.88582287754294	0.590607397192569	4.8861949431392	1.02803412176552e-06	7.33636540120307e-06	gained-open
Peak_34137	chr15	99966795	99967205	411	99970065	100016358	upstream	2859	207214	Larp4	99967205	25.9166395982935	2.09642189498285	0.429122930207489	4.88536441986261	1.03237726785728e-06	7.363471336166e-06	gained-open
Peak_12778	chr11	48902066	48902298	233	48887422	48902152	overlapStart	0	432555	Gm5431	48902298	17.8196522286864	2.77618767089768	0.568341611805838	4.88471653883776	1.03577755934503e-06	7.38160239392815e-06	gained-open
Peak_39953	chr17	35264297	35264448	152	35265784	35323601	upstream	1335	14980	H2-L	35264448	40.012288056381	1.83462017399911	0.376335362830682	4.87496088648072	1.08830016093304e-06	7.718120316734e-06	gained-open
Peak_33599	chr15	88978480	88978757	278	88955884	88978553	overlapStart	0	170790	Mlc1	88978757	22.6558435643881	-2.14529609046213	0.440329717478594	-4.87202204463163	1.10461839986327e-06	7.82094958370485e-06	gained-close
Peak_33599	chr15	88978480	88978757	278	88982994	89055152	upstream	4236	83456	Mov10l1	88978757	22.6558435643881	-2.14529609046213	0.440329717478594	-4.87202204463163	1.10461839986327e-06	7.82094958370485e-06	gained-close
Peak_19697	chr12	69238501	69238671	171	69241832	69283961	upstream	3160	271005	Klhdc1	69238671	24.993023385861	-2.00905999673903	0.41257233367877	-4.86959457224122	1.1182745303882e-06	7.90403288919731e-06	gained-close
Peak_54717	chr2	164190657	164190826	170	164189231	164190558	upstream	98	192200	Wfdc12	164190826	14.2158341364606	-3.13522408359205	0.64400725245651	-4.86830555344371	1.12559200102612e-06	7.95040740996546e-06	gained-close
Peak_77972	chr7	29084422	29084651	230	29083636	29083694	upstream	727	100316710	Mir1963	29084651	33.2869598770751	-1.83465861163007	0.376971079561497	-4.86684181121851	1.13395720550816e-06	8.00188529444022e-06	gained-close
Peak_26708	chr13	117026459	117026586	128	116854824	117025516	upstream	942	52552	Parp8	117026586	36.0699964803377	-1.84360237048967	0.379501622324686	-4.8579564935624	1.1860346091282e-06	8.32882944115069e-06	gained-close
Peak_86185	chr8	114205083	114205645	563	114205640	114374070	overlapStart	0	270097	Vat1l	114205645	43.2678525974414	-1.5441578648791	0.317918867835695	-4.85708154219126	1.19128544591327e-06	8.36073819703787e-06	gained-close
Peak_87579	chr9	15706661	15707029	369	15709769	15738789	upstream	2739	234967	Slc36a4	15707029	38.8781321133607	1.91209113554225	0.393984652933309	4.85321222871571	1.21477567947079e-06	8.50503249390043e-06	gained-open
Peak_35561	chr16	23056815	23057145	331	23058300	23082078	upstream	1154	16644	Kng1	23057145	26.6014577376983	-1.9281300518558	0.39731737137508	-4.85287125801399	1.21686691176996e-06	8.51563806900723e-06	gained-close
Peak_46644	chr19	34583125	34583624	500	34583529	34588982	overlapStart	0	15959	Ifit3	34583624	43.54332214421	1.56318401690692	0.32256553029682	4.84609752154394	1.25913640734994e-06	8.78155981966447e-06	gained-open
Peak_69014	chr5	107826260	107826416	157	107830162	107831777	upstream	3745	73318	Ube2d2b	107826416	27.9153835089679	-1.88298855144936	0.390628457289658	-4.82040802791051	1.43264894843745e-06	9.86298838712514e-06	gained-close
Peak_32404	chr15	73843036	73843207	172	73761410	73839671	upstream	3364	268816	Mroh5	73843207	14.3615340505855	-2.86771896362012	0.596867918691411	-4.8046123335082	1.55051629927932e-06	1.05766922640146e-05	gained-close
Peak_69425	chr5	114718963	114719472	510	114719515	114719578	upstream	42	102465622	Mir7028	114719472	43.2763867200412	1.68663683962039	0.352777287670242	4.78102445528457	1.74404142566139e-06	1.17351908332945e-05	gained-open
Peak_28836	chr14	62662240	62662577	338	62663667	62692243	upstream	1089	319433	Serpine3	62662577	26.9196257254078	1.97089382596944	0.412971035240945	4.7724747204596	1.81975955412807e-06	1.21848802022677e-05	gained-open
Peak_62788	chr4	106466726	106466940	215	106442334	106464325	upstream	2400	100102	Pcsk9	106466940	32.8863382264711	-1.67775102816464	0.352190539833615	-4.76375949495196	1.900189709192e-06	1.2679457443068e-05	gained-close
Peak_55940	chr3	10198878	10199446	569	10179851	10197283	upstream	1594	18857	Pmp2	10199446	40.5001636666123	1.69220132575571	0.356041790001093	4.75281658861034	2.00602309868096e-06	1.33012210032107e-05	gained-open
Peak_55940	chr3	10198878	10199446	569	10193623	10197283	upstream	1594	21884	Fabp9	10199446	40.5001636666123	1.69220132575571	0.356041790001093	4.75281658861034	2.00602309868096e-06	1.33012210032107e-05	gained-open
Peak_76132	chr6	129393242	129393549	308	129397297	129405413	upstream	3747	56760	Clec1b	129393549	24.941825195685	2.08370252230895	0.439619103297878	4.73979066577794	2.13939130458369e-06	1.40879202285325e-05	gained-open
Peak_91025	chr9	98287228	98287416	189	98287455	98420394	upstream	38	74080	Nmnat3	98287416	16.9137923260432	-2.50925499530044	0.530669327616554	-4.72847188393287	2.26215943946083e-06	1.48147484376043e-05	gained-close
Peak_63587	chr4	123612036	123612338	303	123616420	123616521	upstream	4081	102465214	Mir6398	123612338	20.675224472121	2.57009038441421	0.544084200128041	4.72369972112658	2.31592298068289e-06	1.51207874058306e-05	gained-open
Peak_20602	chr12	84110777	84111230	454	84114328	84143517	upstream	3097	105000	Dnal1	84111230	29.5423822705552	1.95826254042236	0.414764054841503	4.72138922735405	2.34239192264181e-06	1.52683154356794e-05	gained-open
Peak_58987	chr3	107931656	107931979	324	107926334	107931745	overlapStart	0	68312	Gstm7	107931979	28.3297165981525	-2.05663885543224	0.435774527103027	-4.71950223686664	2.36422446517022e-06	1.53968348421487e-05	gained-close
Peak_28173	chr14	49783168	49783532	365	49681668	49783367	overlapStart	0	67419	Armh4	49783532	18.5384715819562	-2.31757458199903	0.491420358780125	-4.71607360295787	2.4043948526129e-06	1.56240249623117e-05	gained-close
Peak_25353	chr13	74366953	74367516	564	74359582	74364000	upstream	2952	432779	Lrrc14b	74367516	40.7045042623997	1.54891257657774	0.329245281101477	4.70443364107123	2.54571648637554e-06	1.64328639403687e-05	gained-open
Peak_68134	chr5	77000532	77000904	373	77004055	77009478	upstream	3150	384185	Arl9	77000904	31.7455985111743	1.76472103826252	0.375211449575305	4.70327075642274	2.56026532725848e-06	1.65132575368568e-05	gained-open
Peak_50900	chr2	71526855	71526985	131	71529445	71533981	upstream	2459	13390	Dlx1	71526985	22.2077346775752	2.20983059532966	0.472103545723715	4.68081762008815	2.85733050742942e-06	1.8194103521387e-05	gained-open
Peak_91742	chr9	110797086	110797431	346	110798185	110803744	upstream	753	235628	Prss42	110797431	30.9972831479623	-1.75315602959286	0.374781794015537	-4.67780467884782	2.89962544713468e-06	1.84343770614625e-05	gained-close
Peak_39809	chr17	34325037	34325633	597	34325675	34341410	upstream	41	381091	H2-Eb2	34325633	29.1539378825953	2.04049005836476	0.436882341086325	4.67057115032621	3.00363422337911e-06	1.90367668879885e-05	gained-open
Peak_43033	chr18	37330115	37330301	187	37334028	37336346	upstream	3726	93877	Pcdhb6	37330301	18.537247753664	-2.33720458435943	0.500549434796609	-4.66927824083773	3.02259774880224e-06	1.91492588644736e-05	gained-close
Peak_29387	chr14	70850343	70850563	221	70852933	70873954	upstream	2369	73648	2410012E07Rik	70850563	22.3070153259233	-2.09588496244183	0.450376541084533	-4.65362817831236	3.26144700797365e-06	2.04963767527803e-05	gained-close
Peak_90917	chr9	95845201	95845495	295	95752642	95845279	overlapStart	0	102502	Pls1	95845495	29.5030503648067	-1.79546166435237	0.386171267901359	-4.64939215729275	3.32914696896264e-06	2.08760706665129e-05	gained-close
Peak_93211	chrX	56374397	56374824	428	56374586	56378470	overlapStart	0	320237	Smim10l2a	56374824	28.6324484488845	-1.86080838957209	0.401841273590908	-4.63070498693092	3.64422796590694e-06	2.26209455378644e-05	gained-close
Peak_77063	chr7	6729479	6729785	307	6730583	6967219	upstream	797	57775	Usp29	6729785	24.7423181588807	-1.95460468275841	0.42237900033641	-4.62760857239976	3.6991231685111e-06	2.29270994811426e-05	gained-close
Peak_16893	chr11	105460022	105460195	174	105360798	105456735	upstream	3286	632687	March10	105460195	17.9602375526172	2.52229249466659	0.54582042691283	4.62110315096253	3.81704918856693e-06	2.35792200805461e-05	gained-open
Peak_62076	chr4	63629918	63630090	173	63634421	63639478	upstream	4330	102632940	Gm11482	63630090	17.018168827279	2.72240487461999	0.589843872514259	4.61546690824389	3.922125353158e-06	2.416677029835e-05	gained-open
Peak_73978	chr6	83710916	83711457	542	83711264	83738304	overlapStart	0	24113	Vax2	83711457	49.4883244939952	-1.53944545451869	0.333910429482602	-4.61035451005253	4.01982884430019e-06	2.47060305102231e-05	gained-close
Peak_85697	chr8	104446171	104446286	116	104417674	104443047	upstream	3123	234663	Dync1li2	104446286	24.8235340627739	2.02740444140824	0.439909574529403	4.60868450880406	4.0522467488037e-06	2.48777972691319e-05	gained-open
Peak_13629	chr11	60698753	60699031	279	60699690	60714188	upstream	658	16897	Llgl1	60699031	41.5646043533468	-1.65074632082782	0.358944265447059	-4.59889314228728	4.24741560811819e-06	2.59580750013973e-05	gained-close
Peak_94158	chrX	159411757	159412056	300	159414572	159498757	upstream	2515	78283	Map7d2	159412056	34.1681860301737	-1.69287966518538	0.368640703568064	-4.59222123004878	4.38553108260272e-06	2.67107161270014e-05	gained-close
Peak_4811	chr1	162635962	162636313	352	162639150	162649694	upstream	2836	17926	Myoc	162636313	22.1159654839282	2.10509813024972	0.458509466368898	4.59117703047824	4.40753279523021e-06	2.68188222038558e-05	gained-open
Peak_26093	chr13	101249300	101249532	233	101254319	101293396	upstream	4786	71174	4933416M06Rik	101249532	16.4644167064266	-2.45645825991107	0.535354502365528	-4.5884703482588	4.46505713695431e-06	2.71217460994349e-05	gained-close
Peak_1101	chr1	53189722	53190057	336	53158577	53187617	upstream	2104	69397	1700019A02Rik	53190057	22.1757836726864	2.6739235912033	0.582911026116311	4.58718993363108	4.49251937302497e-06	2.72727982420688e-05	gained-open
Peak_27684	chr14	32388315	32388501	187	32376502	32388373	overlapStart	0	67085	1700024G13Rik	32388501	20.044664162778	-2.17540539667489	0.474499484381139	-4.58463173993148	4.54787271239265e-06	2.75716786817442e-05	gained-close
Peak_44794	chr18	84846599	84846747	149	84851414	84879863	upstream	4666	109672	Cyb5a	84846747	45.4840840968718	1.53656204209274	0.335575007117563	4.57889297326134	4.67443287827036e-06	2.82701142288337e-05	gained-open
Peak_8933	chr10	76623374	76623552	179	76595756	76623404	overlapStart	0	12834	Col6a2	76623552	19.1484449006326	-2.22817428449431	0.486657204301617	-4.57852933193885	4.68256509974977e-06	2.83156761794137e-05	gained-close
Peak_8032	chr10	53382802	53383026	225	53278081	53379851	upstream	2950	100038725	Cep85l	53383026	39.0394616851006	-1.65869613339558	0.362673582389877	-4.5735234490073	4.79589976362159e-06	2.89196821363493e-05	gained-close
Peak_86731	chr8	122419572	122419815	244	122422085	122423639	upstream	2269	234836	Il17c	122419815	29.1890467999556	1.8322861922635	0.401082061272421	4.56835737417582	4.91561386167138e-06	2.95737084259003e-05	gained-open
Peak_84200	chr8	60631605	60631917	313	60632825	60676731	upstream	907	71306	Mfap3l	60631917	42.0267214045028	-1.53333792127633	0.335718707104394	-4.56732940056129	4.9397742144357e-06	2.96964020671605e-05	gained-close
Peak_76052	chr6	128826151	128826469	319	128778485	128826315	overlapStart	0	17059	Klrb1c	128826469	33.177615741654	1.75733579157531	0.385197616973866	4.56216683109577	5.062839250941e-06	3.03456012528209e-05	gained-open
Peak_76052	chr6	128826151	128826469	319	128813706	128826315	overlapStart	0	80782	Klrb1b	128826469	33.177615741654	1.75733579157531	0.385197616973866	4.56216683109577	5.062839250941e-06	3.03456012528209e-05	gained-open
Peak_89554	chr9	62031066	62031250	185	61953738	62026790	upstream	4275	74090	Paqr5	62031250	21.0365570786251	-2.07307662231113	0.454582440168626	-4.56039749696914	5.10568804815257e-06	3.05598331952121e-05	gained-close
Peak_13078	chr11	52162623	52162800	178	52154876	52157907	upstream	4715	257871	Olfr1372-ps1	52162800	27.3160003827318	-1.82783234787994	0.401244304928522	-4.55541007169073	5.22834801708076e-06	3.12189530739676e-05	gained-close
Peak_33211	chr15	81933978	81934456	479	81936759	81950941	upstream	2302	105859	Csdc2	81934456	33.212048226226	1.94502579238029	0.427044731011374	4.55461840677407	5.24807574785614e-06	3.13209345320261e-05	gained-open
Peak_18316	chr12	4038407	4039132	726	3962554	4038915	overlapStart	0	668212	Efr3b	4039132	41.1720765693844	-1.51387134588684	0.332634009668707	-4.55116224403696	5.33503875344185e-06	3.17857973618062e-05	gained-close
Peak_14402	chr11	72299367	72299621	255	72301629	72313733	upstream	2007	327959	Xaf1	72299621	33.7108447089039	-1.69787023449352	0.373388098168907	-4.54719966388823	5.43644186540457e-06	3.23207452471856e-05	gained-close
Peak_35302	chr16	19760116	19760309	194	19760234	19772753	overlapStart	0	108105	B3gnt5	19760309	19.0859744510911	-2.18404292128611	0.480614357924463	-4.54427314805558	5.51251377455101e-06	3.27183084830492e-05	gained-close
Peak_36598	chr16	44394663	44394818	156	44394799	44482428	overlapStart	0	212517	Cfap44	44394818	14.7139081523386	-2.73186571171258	0.601509001604861	-4.54168716415515	5.58058103786628e-06	3.30755100840086e-05	gained-close
Peak_68292	chr5	90771339	90771808	470	90772435	90773383	upstream	626	56744	Pf4	90771808	23.556928235228	2.13180921758843	0.469602456905993	4.53960405495747	5.63599619000454e-06	3.33562124211179e-05	gained-open
Peak_5326	chr1	172555184	172555482	299	172555938	172563717	upstream	455	240916	Vsig8	172555482	31.3008497341615	1.78995970805203	0.394371584848413	4.53876439586804	5.6584815346894e-06	3.34830062591209e-05	gained-open
Peak_5326	chr1	172555184	172555482	299	172541620	172550806	upstream	4377	71319	4933439K11Rik	172555482	31.3008497341615	1.78995970805203	0.394371584848413	4.53876439586804	5.6584815346894e-06	3.34830062591209e-05	gained-open
Peak_24057	chr13	44437727	44437907	181	44439727	44457567	upstream	1819	69491	1700029N11Rik	44437907	12.7792228709981	-2.82908388352286	0.623478496219197	-4.53758052712092	5.69033045172244e-06	3.36399051875056e-05	gained-close
Peak_35878	chr16	30065138	30065412	275	30065357	30067796	overlapStart	0	15205	Hes1	30065412	44.4338083792898	-1.50066489688406	0.331046254374671	-4.53309734532034	5.81250111886057e-06	3.42914368203369e-05	gained-close
Peak_48422	chr2	11700094	11700335	242	11705293	11733985	upstream	4957	16169	Il15ra	11700335	21.8509277695692	-2.08747162979135	0.461227572984559	-4.52590380987746	6.01379306263992e-06	3.53686998933303e-05	gained-close
Peak_73284	chr6	53219368	53219713	346	53221164	53226599	upstream	1450	231989	Gm4872	53219713	33.7415728930675	1.87250202410474	0.414137593587899	4.52144903794469	6.1417747224853e-06	3.60385002416079e-05	gained-open
Peak_25879	chr13	97064480	97064628	149	97067287	97129522	upstream	2658	320557	Fam169a	97064628	13.8134774244491	-2.66729302250451	0.590357527325753	-4.51809776117707	6.23976751235491e-06	3.65568147927823e-05	gained-close
Peak_27926	chr14	43955073	43955537	465	43957069	43963080	upstream	1531	503844	Ang5	43955537	28.273301707217	1.86788409705587	0.414740518168601	4.50374153290839	6.67674041964721e-06	3.88307434770482e-05	gained-open
Peak_91309	chr9	105049045	105049217	173	105053268	105077476	upstream	4050	94062	Mrpl3	105049217	24.6633273978331	-1.9351969959884	0.43150923465688	-4.48471745344499	7.30106152958735e-06	4.20048671218705e-05	gained-close
Peak_42899	chr18	35664791	35664957	167	35656689	35662186	upstream	2604	71242	Spata24	35664957	34.9930550645351	-1.72480397569485	0.384964206871376	-4.48042686802604	7.44939018369463e-06	4.27591923139555e-05	gained-close
Peak_40634	chr17	48261095	48261273	179	48264295	48275358	upstream	3021	224840	Treml4	48261273	24.5685046044124	1.94042840816055	0.433576076537747	4.47540469404017	7.62667139939266e-06	4.36575830102827e-05	gained-open
Peak_5360	chr1	173538041	173538242	202	173521311	173535957	upstream	2083	545384	Ifi214	173538242	22.5467538238971	-2.03893994829305	0.455909675986499	-4.4722453935227	7.74025311055507e-06	4.42348352078334e-05	gained-close
Peak_31386	chr15	39859224	39859838	615	39768485	39857470	upstream	1753	64705	Dpys	39859838	54.8332674998402	4.16419101942072	0.931530745566933	4.47026685832723	7.81220613025916e-06	4.46143651550947e-05	gained-open
Peak_47100	chr19	43646320	43646490	171	43637380	43642007	upstream	4312	100043245	Gm4311	43646490	30.9046638337058	-1.79088269363362	0.400736905483578	-4.46897370600923	7.85957904702188e-06	4.48524149669774e-05	gained-close
Peak_13166	chr11	53621530	53621842	313	53612460	53618665	upstream	2864	16189	Il4	53621842	29.7962544404777	-1.80305891515868	0.403699931078535	-4.4663344636735	7.95711783059457e-06	4.53488608121223e-05	gained-close
Peak_74532	chr6	91212575	91212864	290	91212764	91272540	overlapStart	0	14115	Fbln2	91212864	22.5153066330343	-1.95754627889515	0.438354454431068	-4.46566986854465	7.98186112768225e-06	4.54789179622686e-05	gained-close
Peak_27040	chr14	18896770	18896972	203	18573577	18893627	upstream	3142	218793	Ube2e2	18896972	24.0541090470757	-2.02027840290779	0.453607118335635	-4.45380665612249	8.43610740095139e-06	4.77307802628077e-05	gained-close
Peak_39600	chr17	32189967	32190096	130	32183770	32189463	upstream	503	71932	Ephx3	32190096	33.1044180543479	-1.6021827758966	0.360415687495838	-4.44537469228527	8.77388105669811e-06	4.94643818157429e-05	gained-close
Peak_46652	chr19	34640634	34641053	420	34617051	34640743	overlapStart	0	112419	Ifit1bl2	34641053	40.8746864226078	1.5041231226207	0.338621842981273	4.44189633302504	8.91695206614311e-06	5.01723068377266e-05	gained-open
Peak_46652	chr19	34640634	34641053	420	34640889	34650009	overlapStart	0	15957	Ifit1	34641053	40.8746864226078	1.5041231226207	0.338621842981273	4.44189633302504	8.91695206614311e-06	5.01723068377266e-05	gained-open
Peak_77754	chr7	26263828	26264135	308	26266831	26267775	upstream	2695	100312477	Vmn1r184	26264135	18.4402604106306	2.36083625251105	0.532411993138023	4.43422815965572	9.24027292292437e-06	5.1785158470836e-05	gained-open
Peak_9081	chr10	78446243	78446648	406	78445095	78445157	upstream	1085	102466762	Mir6908	78446648	66.4090986570684	1.51901538863965	0.342971589675131	4.4289831413689	9.46784226175176e-06	5.29507380595464e-05	gained-open
Peak_55680	chr2	180955594	180955980	387	180934772	180954699	upstream	894	58237	Nkain4	180955980	33.950472516308	1.72202612019196	0.389726722162848	4.41854772142723	9.93663415669203e-06	5.5271943263641e-05	gained-open
Peak_38692	chr17	23938884	23939123	240	23941996	23945607	upstream	2872	20234	Sbp	23939123	37.2451783611957	-1.51537784340616	0.343424521063207	-4.41254992134721	1.02160228510539e-05	5.66328992058367e-05	gained-close
Peak_91649	chr9	109569937	109570098	162	109552602	109568262	upstream	1674	382105	Fbxw15	109570098	15.2120258951575	-2.40913668364603	0.546998808577984	-4.40428140951347	1.06135097294315e-05	5.85379642897797e-05	gained-close
Peak_53996	chr2	152863229	152863671	443	152865067	152865126	upstream	1395	100885834	Mir5622	152863671	25.6626939987951	2.03048447785527	0.462605728171471	4.38923332376603	1.13750973876073e-05	6.22269263011435e-05	gained-open
Peak_88928	chr9	52172484	52172796	313	52111985	52168572	upstream	3911	244871	Zc3h12c	52172796	17.3359312775459	2.45508158544518	0.562122000097569	4.36752446091603	1.25662726454948e-05	6.79184637739763e-05	gained-open
Peak_84485	chr8	70488413	70488778	366	70493131	70504081	upstream	4352	12931	Crlf1	70488778	33.4929499128537	-1.60456138507517	0.369676086438926	-4.34045220650283	1.42189793902237e-05	7.58158577575101e-05	gained-close
Peak_84485	chr8	70488413	70488778	366	70483867	70487358	upstream	1054	67937	Tmem59l	70488778	33.4929499128537	-1.60456138507517	0.369676086438926	-4.34045220650283	1.42189793902237e-05	7.58158577575101e-05	gained-close
Peak_62374	chr4	88688694	88688906	213	88683207	88683779	upstream	4914	15965	Ifna2	88688906	25.9437309438277	-1.83036760537996	0.422061330964272	-4.33673371876587	1.44615643720491e-05	7.69402068936048e-05	gained-close
Peak_6118	chr1	191166080	191166723	644	191162584	191164817	upstream	1262	619288	Fam71a	191166723	55.3609282655662	1.60500844882546	0.370768091931192	4.32887425793727	1.49873469386621e-05	7.9429328579859e-05	gained-open
Peak_40202	chr17	43566837	43567101	265	43568451	43612201	upstream	1349	27226	Pla2g7	43567101	10.7005604476851	4.15486207482367	0.959851642438743	4.32865027377273	1.50025949324817e-05	7.95012320720532e-05	gained-open
Peak_32362	chr15	73510895	73511152	258	73512560	73572242	upstream	1407	105841	Dennd3	73511152	50.3119132030162	1.57131000436836	0.363430897928327	4.32354544791137	1.53541489684902e-05	8.11596053923895e-05	gained-open
Peak_38385	chr17	13055221	13055396	176	13051321	13052280	upstream	2940	436440	Gpr31b	13055396	26.3816729929398	-1.80191274668654	0.417757581105432	-4.31329753949285	1.60837427830583e-05	8.45202782721775e-05	gained-close
Peak_37571	chr16	92475159	92475327	169	92478742	92497365	upstream	3414	76785	2410124H12Rik	92475327	22.8044639158277	-1.920124249111	0.445331941181768	-4.31166972666639	1.62026330445048e-05	8.50552825329278e-05	gained-close
Peak_12034	chr11	22342586	22342745	160	22005825	22342292	upstream	293	216565	Ehbp1	22342745	12.7905996442912	2.90811788847203	0.674573463606041	4.31104697318839	1.62483381284983e-05	8.52762829792915e-05	gained-open
Peak_28273	chr14	51914383	51914551	169	51918425	51920700	upstream	3873	219038	Tppp2	51914551	30.5414808706747	-1.58875088861581	0.368783384200847	-4.30808696020463	1.64672645185784e-05	8.62577945321202e-05	gained-close
Peak_28273	chr14	51914383	51914551	169	51905271	51913488	upstream	894	29811	Ndrg2	51914551	30.5414808706747	-1.58875088861581	0.368783384200847	-4.30808696020463	1.64672645185784e-05	8.62577945321202e-05	gained-close
Peak_46770	chr19	37695862	37696079	218	37697808	37701536	upstream	1728	13082	Cyp26a1	37696079	23.0170208615781	-1.81835269214667	0.422264073197752	-4.30619796369725	1.66084436416719e-05	8.68866633025886e-05	gained-close
Peak_74076	chr6	85586958	85587068	111	85587531	85702751	upstream	462	236266	Alms1	85587068	33.6781432803614	-1.58120651451068	0.367232518385234	-4.30573665279817	1.66430957672916e-05	8.70415168631647e-05	gained-close
Peak_9107	chr10	79613959	79614413	455	79606854	79614025	overlapStart	0	237397	C2cd4c	79614413	30.695381491489	-1.83440596970647	0.426890064176415	-4.29713906142446	1.73016661393607e-05	9.00303298377624e-05	gained-close
Peak_86792	chr8	122848213	122848479	267	122848374	122867397	overlapStart	0	12555	Cdh15	122848479	41.8785412626068	-1.5090798838142	0.351305793115713	-4.29563051161283	1.74197515927451e-05	9.05601175504583e-05	gained-close
Peak_74403	chr6	89289344	89289535	192	89269511	89285725	upstream	3618	75131	4930512J16Rik	89289535	26.2273963122365	1.80126004105532	0.419390056205798	4.29495171476224	1.74731362443496e-05	9.08121016569886e-05	gained-open
Peak_12710	chr11	46052224	46052727	504	46054502	46147347	upstream	1774	11492	Adam19	46052727	35.3422032406491	1.6335632421189	0.380499125220819	4.29321155776869	1.76107055995698e-05	9.14275516444551e-05	gained-open
Peak_93050	chrX	41400582	41400845	264	41400854	41678601	upstream	8	53623	Gria3	41400845	32.3633062953858	-1.52519777962075	0.355340862557236	-4.29221049514135	1.76903122802779e-05	9.17800758754031e-05	gained-close
Peak_88113	chr9	35278557	35278899	343	35281105	35285423	upstream	2205	71133	4933422A05Rik	35278899	36.0472974102692	1.54638127158253	0.360434638812887	4.29032369551281	1.7841287727496e-05	9.24670136270124e-05	gained-open
Peak_72816	chr6	41518115	41518320	206	41521776	41525079	upstream	3455	22072	Prss2	41518320	27.7863545451199	1.71913154489812	0.401496415072527	4.28181044801503	1.85378865498193e-05	9.56789577158867e-05	gained-open
Peak_32464	chr15	74998862	74999184	323	74994877	74998031	upstream	830	110454	Ly6a	74999184	20.0539842795706	2.10169696739016	0.490994772625364	4.28048746049234	1.86484395160819e-05	9.62023157674051e-05	gained-open
Peak_12684	chr11	45806836	45807046	211	45808083	45842880	upstream	1036	100009664	F630206G17Rik	45807046	40.8093553879063	1.52569728521844	0.358695314042562	4.25346310779349	2.10489630043033e-05	0.0001071775131316	gained-open
Peak_21566	chr12	105701221	105701545	325	105705982	105782447	upstream	4436	78801	Ak7	105701545	25.3858922778477	2.12497544251742	0.49992139994801	4.25061908279663	2.1318045639039e-05	0.000108353216932147	gained-open
Peak_34509	chr16	3835434	3836056	623	3838975	3839913	upstream	2918	18312	Olfr15	3836056	37.9959086773457	1.60557014331119	0.379047381971182	4.23580327863406	2.27736094822526e-05	0.000114950653506802	gained-open
Peak_77565	chr7	24724004	24724337	334	24722494	24724290	overlapStart	0	210155	Gm4763	24724337	31.1440601554011	1.69987859517705	0.402379091312793	4.22456989410425	2.39397546509899e-05	0.000120069513643921	gained-open
Peak_68397	chr5	92602959	92603285	327	92603051	92606579	overlapStart	0	52331	Stbd1	92603285	29.2054775781645	-1.59290786967347	0.377894787531348	-4.21521524570203	2.49540071972233e-05	0.000124481877400501	gained-close
Peak_45249	chr19	6180204	6180355	152	6184410	6224219	upstream	4054	622554	Majin	6180355	30.0078222417522	-1.55492167731444	0.369141846410383	-4.21226065924209	2.52827547794435e-05	0.000125942517831931	gained-close
Peak_34310	chr15	101695690	101695837	148	101689928	101694305	upstream	1384	16687	Krt6a	101695837	15.727038555725	-2.33913166570394	0.556278435011007	-4.20496556847051	2.6112190585086e-05	0.000129555795180022	gained-close
Peak_24959	chr13	60601764	60602228	465	60601947	60763191	overlapStart	0	69635	Dapk1	60602228	48.1435178256844	1.50948667660134	0.359437759340568	4.19957736040498	2.67413656254477e-05	0.000132254359159449	gained-open
Peak_85907	chr8	106892425	106892551	127	106893640	106923094	upstream	1088	21771	Utp4	106892551	29.4418227298481	-1.58152710637438	0.376781883860781	-4.19746058427465	2.69924617336651e-05	0.000133356772404571	gained-close
Peak_27781	chr14	33980444	33980624	181	33967070	33978764	upstream	1679	382867	Zfp488	33980624	26.3292763704171	-1.6497295529881	0.394112845357301	-4.18593195431745	2.83998425285017e-05	0.000139409699184493	gained-close
Peak_63556	chr4	123229190	123229374	185	123233556	123249870	upstream	4181	56198	Heyl	123229374	19.5290311151027	-1.90849600303201	0.457773285894116	-4.16908557541614	3.05824155100889e-05	0.000148854247144491	gained-close
Peak_25628	chr13	92576679	92577042	364	92574631	92576232	upstream	446	79401	Spz1	92577042	22.9133651286109	1.89746872027249	0.455777608860785	4.16314598037233	3.13892542870708e-05	0.000152240940791685	gained-open
Peak_63466	chr4	120975035	120975189	155	120973259	120973322	upstream	1712	102465614	Mir7015	120975189	18.041757864005	-2.01447927988286	0.483929484494503	-4.16275375737257	3.14432399646096e-05	0.000152455881513523	gained-close
Peak_13729	chr11	61579534	61579817	284	61517249	61579687	overlapStart	0	13855	Epn2	61579817	20.1929256805561	-2.01538929980998	0.485876685327629	-4.14794403738677	3.35474372759382e-05	0.000161417396548032	gained-close
Peak_33621	chr15	89190511	89190689	179	89185465	89185537	upstream	4973	102465578	Mir6958	89190689	17.2278894438877	2.32452363091498	0.561001766110196	4.14352283956693	3.42010991312092e-05	0.000164261812590475	gained-open
Peak_26755	chr13	118711159	118711411	253	118714699	118792573	upstream	3287	14165	Fgf10	118711411	18.8614391582808	-2.05946394238865	0.497695252581823	-4.13800198355331	3.50343343344258e-05	0.000167880171911193	gained-close
Peak_22604	chr13	12341558	12341734	177	12269426	12340732	upstream	825	11472	Actn2	12341734	19.0639141263912	-1.91391462690455	0.463070638899629	-4.13309431894124	3.57911761724986e-05	0.000171018844714745	gained-close
Peak_10651	chr10	116470361	116470532	172	116473163	116474987	upstream	2630	100504412	Kcnmb4os2	116470532	18.0218466711567	-2.0103364566453	0.486662463969884	-4.1308640083853	3.61402339537216e-05	0.000172471901403641	gained-close
Peak_81353	chr7	121587745	121588177	433	121589903	121591591	upstream	1725	69407	1700025J12Rik	121588177	27.4139716353607	1.7155518210603	0.416207769205588	4.12186400156528	3.75819057368008e-05	0.000178451805567947	gained-open
Peak_26573	chr13	113032123	113032226	104	113035379	113091135	upstream	3152	238896	Cdc20b	113032226	30.30966820793	-1.55842501013045	0.380825443667542	-4.09222922481763	4.27245998907568e-05	0.000199812323756238	gained-close
Peak_73474	chr6	57034674	57034919	246	57035913	57037125	upstream	993	171205	Vmn1r8	57034919	19.6660540668663	1.9774044058231	0.483509938504375	4.08968719844671	4.31955327075249e-05	0.000201805262584104	gained-open
Peak_52806	chr2	126552042	126552178	137	126553024	126588243	upstream	845	26458	Slc27a2	126552178	30.3806557458233	-1.58541616959093	0.388057108245785	-4.08552281584999	4.39776785616387e-05	0.000205034114823693	gained-close
Peak_65052	chr4	141300239	141300492	254	141301221	141329384	upstream	728	13836	Epha2	141300492	29.2161016780059	1.60537152853136	0.393627305283743	4.07840489463541	4.53457448175885e-05	0.000210583897118442	gained-open
Peak_23579	chr13	35656770	35657372	603	35659862	35874064	upstream	2489	12593	Cdyl	35657372	32.0215396513743	1.59934498346026	0.392241097342872	4.07745387797091	4.55315580534561e-05	0.000211386023100166	gained-open
Peak_88606	chr9	45078017	45078291	275	45079183	45108531	upstream	891	270152	Jaml	45078291	11.7016014395727	3.20484552618104	0.786837894316153	4.07306962378369	4.63975469311148e-05	0.00021482338985783	gained-open
Peak_5386	chr1	174031802	174031974	173	174011998	174031755	upstream	46	226695	Ifi205	174031974	11.9257405981256	2.77729500897193	0.682303822616488	4.07046672891499	4.69190419896833e-05	0.000216887661803771	gained-open
Peak_5386	chr1	174031802	174031974	173	173962569	174031755	upstream	46	26388	Ifi202b	174031974	11.9257405981256	2.77729500897193	0.682303822616488	4.07046672891499	4.69190419896833e-05	0.000216887661803771	gained-open
Peak_56874	chr3	53483621	53483970	350	53488793	53507652	upstream	4822	229277	Stoml3	53483970	25.2212040966914	1.83495495171607	0.450808943450504	4.07036057818922	4.69404270016973e-05	0.000216965313509995	gained-open
Peak_50137	chr2	42452473	42452826	354	42447439	42447568	upstream	4904	102465171	Mir6336	42452826	16.73503801547	2.32606080659078	0.572144393679128	4.06551358763342	4.79268017762265e-05	0.000220984648057398	gained-open
Peak_84672	chr8	72013593	72013763	171	71988482	72009626	upstream	3966	72054	Cyp4f18	72013763	17.4641379526669	2.13928585370019	0.527298058018855	4.0570713682084	4.96919009553158e-05	0.000228200183572575	gained-open
Peak_54356	chr2	156887201	156887348	148	156872922	156887078	upstream	122	77799	Sla2	156887348	25.4347532755085	-1.62287081731595	0.400115957193819	-4.05600123698596	4.9919994957529e-05	0.000229125317434115	gained-close
Peak_77835	chr7	27653878	27654097	220	27653924	27656207	overlapStart	0	73032	Ttc9b	27654097	30.0175306831308	-1.72058651612967	0.424859462398291	-4.04977802875596	5.1266237213152e-05	0.000234587358538692	gained-close
Peak_11123	chr10	127846894	127847017	124	127849928	127861176	upstream	2910	216453	Rdh19	127847017	13.5496314023724	-2.32798939038088	0.574927114121652	-4.04919046814739	5.13951043868753e-05	0.000235086072891975	gained-close
Peak_51423	chr2	84775808	84776014	207	84765360	84775429	upstream	378	12258	Serping1	84776014	25.9632147073088	-1.71784147310843	0.424737988384075	-4.0444733461304	5.24408737130378e-05	0.000239256428361094	gained-close
Peak_71657	chr5	148950176	148950328	153	148950250	148951658	overlapStart	0	71473	8430423G03Rik	148950328	13.8587347941239	-2.54712158278929	0.631559253319246	-4.03306826620391	5.50532779537932e-05	0.000249502774327979	gained-close
Peak_63452	chr4	120854692	120854938	247	120854816	120891560	overlapStart	0	242662	Rims3	120854938	22.4129951722279	-1.80231255687283	0.446888974010422	-4.03302086578399	5.50643882335063e-05	0.000249541172313618	gained-close
Peak_76985	chr7	4604900	4605348	449	4548614	4604041	upstream	858	545902	Ptprh	4605348	22.6780269293447	1.78584362457506	0.44485807928295	4.01441202878364	5.95941649140281e-05	0.000267506432238401	gained-open
Peak_13873	chr11	63058467	63058730	264	63061659	63094960	upstream	2928	71062	Tekt3	63058730	25.7045303492108	-1.60487744286783	0.401335371367924	-3.99884375353639	6.36526818258397e-05	0.00028363834095499	gained-close
Peak_21492	chr12	104235854	104236254	401	104236242	104241934	overlapStart	0	20715	Serpina3g	104236254	67.4294856673626	-2.50072294158369	0.627012386352944	-3.98831505726594	6.65442507791147e-05	0.000294842890090339	gained-close
Peak_21492	chr12	104235854	104236254	401	104236242	104254405	overlapStart	0	546546	Serpina3h	104236254	67.4294856673626	-2.50072294158369	0.627012386352944	-3.98831505726594	6.65442507791147e-05	0.000294842890090339	gained-close
Peak_73926	chr6	83154381	83154529	149	83156404	83162975	upstream	1874	71837	1700003E16Rik	83154529	17.5853546261577	2.05593007490975	0.515943729554324	3.98479515718832	6.75383615938879e-05	0.000298688025287554	gained-open
Peak_43689	chr18	60909537	60909741	205	60912240	60917768	upstream	2498	545260	Arsi	60909741	26.882686872533	-1.60193646159444	0.402502458007827	-3.97994205929368	6.89320668950034e-05	0.000304254321203168	gained-close
Peak_92308	chr9	121839929	121840146	218	121797627	121839461	upstream	467	100502861	Ccdc13	121840146	17.056471378776	2.11998303699532	0.533480613139466	3.97387081138616	7.07139281254618e-05	0.000311141760840542	gained-open
Peak_2600	chr1	90995515	90995687	173	90998727	91128944	upstream	3039	16978	Lrrfip1	90995687	25.5414065176502	-1.66576131558581	0.41947740956153	-3.9710393876204	7.155974600698e-05	0.000314400284713526	gained-close
Peak_36608	chr16	44761937	44762175	239	44765736	44794977	upstream	3560	57781	Cd200r1	44762175	22.8130503382111	2.06135892524339	0.51986493789895	3.96518167502204	7.33400668551514e-05	0.00032105919970841	gained-open
Peak_49772	chr2	33645387	33645844	458	33564536	33640511	upstream	4875	16917	Lmx1b	33645844	32.7074642259804	1.85296262928789	0.468560092388357	3.95458908982821	7.66663006930486e-05	0.000333936097760891	gained-open
Peak_3088	chr1	107511249	107511555	307	107511423	107525600	overlapStart	0	18788	Serpinb2	107511555	18.1392208877112	2.03618770630059	0.51506231831301	3.95328416369061	7.70857989030898e-05	0.00033559335010012	gained-open
Peak_88538	chr9	44444412	44444892	481	44434234	44440868	upstream	3543	382074	Foxr1	44444892	28.8976714171556	1.64229644888296	0.416777709025948	3.94046133782246	8.13250575009512e-05	0.00035183091228896	gained-open
Peak_69460	chr5	115007031	115007322	292	115011524	115098790	upstream	4201	74585	Sppl3	115007322	32.8475346117109	1.50993302514279	0.383260912948655	3.93970001669612	8.15835590415558e-05	0.000352739554256452	gained-open
Peak_64984	chr4	140810661	140810793	133	140810993	140817511	upstream	199	100049161	Gm13032	140810793	18.9124341081678	-1.86773229853099	0.475747970407624	-3.92588600416036	8.64110747875225e-05	0.000371186257780074	gained-close
Peak_64984	chr4	140810661	140810793	133	140785369	140810648	upstream	12	18601	Padi3	140810793	18.9124341081678	-1.86773229853099	0.475747970407624	-3.92588600416036	8.64110747875225e-05	0.000371186257780074	gained-close
Peak_91327	chr9	105638695	105638848	154	105642995	105687655	upstream	4146	75669	Pik3r4	105638848	19.4222950979111	1.8880782487104	0.483137557416113	3.90795172043363	9.30819002587425e-05	0.000395780056443982	gained-open
Peak_39938	chr17	35208134	35208392	259	35203165	35205351	upstream	2782	16992	Lta	35208392	26.1390004047812	1.56508934787118	0.400598257255392	3.90688007130643	9.34955291189256e-05	0.000397342348853379	gained-open
Peak_15189	chr11	82045546	82045913	368	82045712	82047525	overlapStart	0	20306	Ccl7	82045913	27.4513113681049	1.70637764133061	0.438531086949277	3.89112127306946	9.97820423639953e-05	0.000420751466388311	gained-open
Peak_14744	chr11	76667730	76668081	352	76672470	76673676	upstream	4388	320522	Bhlha9	76668081	28.2677447134001	-1.55268714127362	0.399487572576442	-3.88669697848114	0.000101617473126511	0.000427546821546622	gained-close
Peak_78920	chr7	55768074	55768193	120	55768178	55778925	overlapStart	0	233274	Siglech	55768193	14.8150839627905	-2.24763347548626	0.580219807031496	-3.87376206094296	0.000107168049601039	0.00044816074351571	gained-close
Peak_63449	chr4	120832606	120832885	280	120757435	120831579	upstream	1026	18046	Nfyc	120832885	19.8030042028139	1.94034659988018	0.503022189522361	3.85737774654159	0.000114609970261564	0.000475415041284057	gained-open
Peak_92681	chrX	9473858	9474085	228	9435254	9469324	upstream	4533	13058	Cybb	9474085	17.3808654462369	2.12695645862628	0.552793170044254	3.8476532885817	0.000119254660625893	0.000492312766024359	gained-open
Peak_9004	chr10	77715326	77715616	291	77715807	77716169	upstream	190	100502921	Gm10142	77715616	21.7050630150697	2.05061457407366	0.534962150840662	3.83319562113176	0.000126489285877434	0.000518485501720993	gained-open
Peak_85815	chr8	105893338	105893735	398	105893567	105895023	overlapStart	0	234700	Nrn1l	105893735	27.0902547109102	-1.51724858524047	0.396019219403339	-3.83124987601972	0.000127493942167048	0.000521902639117986	gained-close
Peak_37654	chr16	93368606	93368809	204	93369720	93369816	upstream	910	791074	Mir802	93368809	14.6912214022253	-2.09376934956438	0.546884167568279	-3.82854263065308	0.000128904305131321	0.000526764316498369	gained-close
Peak_62919	chr4	107966455	107966675	221	107968334	108013532	upstream	1658	242607	Slc1a7	107966675	25.3611625061547	-1.53365241096612	0.401217807795047	-3.8224933718534	0.000132109030756744	0.000538395234073081	gained-close
Peak_49165	chr2	27674694	27675006	313	27677201	27763319	upstream	2194	20181	Rxra	27675006	16.914469326977	2.100914306626	0.550558199095664	3.81597133614016	0.000135648251850173	0.000551014964127843	gained-open
Peak_87580	chr9	15709343	15709556	214	15709769	15738789	upstream	212	234967	Slc36a4	15709556	15.4588765142218	2.1437980305302	0.562673538729117	3.81002105656558	0.000138954956464016	0.000562659331074931	gained-open
Peak_92219	chr9	120934592	120935724	1133	120924455	120930802	upstream	3789	78060	4930593C16Rik	120935724	255.190601659657	1.60106899269557	0.420683182298381	3.8058782952725	0.000141301857518973	0.000570794343827494	gained-open
Peak_84388	chr8	69649639	69649974	336	69654556	69664453	upstream	4581	636741	Zfp964	69649974	13.2900837432199	2.28329085326625	0.600926040224992	3.79962041986293	0.00014491788227332	0.000583408560440413	gained-open
Peak_62354	chr4	88438727	88439222	496	88396144	88438926	overlapStart	0	66775	Hacd4	88439222	26.8698504363207	1.60901999484213	0.423623899859564	3.79822761505084	0.000145734464823873	0.000586246907863225	gained-open
Peak_64425	chr4	134451632	134451799	168	134448765	134450171	upstream	1460	69409	1700021N21Rik	134451799	16.670908594145	2.27750056475848	0.599887806302717	3.79654418847981	0.00014672721821741	0.000589989595659481	gained-open
Peak_86732	chr8	122420102	122420604	503	122422085	122423639	upstream	1480	234836	Il17c	122420604	41.1784408101118	1.54344954083089	0.406588200591768	3.79610017847168	0.000146990119886145	0.00059082071980068	gained-open
Peak_9002	chr10	77694485	77694708	224	77689957	77690757	upstream	3727	100502831	Gm19402	77694708	21.0435878086977	-1.6831151023685	0.44395104149081	-3.79121782599386	0.000149910401584337	0.000600975611351659	gained-close
Peak_33188	chr15	81739967	81740102	136	81744848	81796269	upstream	4745	20286	Zc3h7b	81740102	16.8618869112115	-1.92408106591732	0.507666699196521	-3.79004781870181	0.00015061828637276	0.000603302155069282	gained-close
Peak_42550	chr18	23775034	23775435	402	23774864	23774989	upstream	44	102465185	Mir6360	23775435	11.5221117463084	2.51865999001492	0.671411241014739	3.75129255537685	0.000175925277254693	0.000690920618537817	gained-open
Peak_2261	chr1	85892842	85892990	149	85894510	85908698	upstream	1519	64294	Itm2c	85892990	37.1521437114492	-1.52463774372129	0.40671025030523	-3.74870744609234	0.000177748280624702	0.000697154091322108	gained-close
Peak_58858	chr3	106032766	106033062	297	106016919	106032895	overlapStart	0	229687	Chil5	106033062	13.1662473596416	2.61570037809292	0.698290899518545	3.7458606146756	0.000179776394266349	0.000704145299162135	gained-open
Peak_54250	chr2	155750633	155750804	172	155751217	155755478	upstream	412	19124	Procr	155750804	14.6904562342889	2.06784943991285	0.552936152562525	3.73976168917445	0.000184194800439462	0.000718739037267296	gained-open
Peak_71672	chr5	149160432	149160750	319	149154128	149156192	upstream	4239	667410	Gm8615	149160750	13.1998350261515	2.26413376855922	0.606153898544822	3.7352457420379	0.000187531969546508	0.000730409613458911	gained-open
Peak_7386	chr10	29535557	29535870	314	29453106	29535867	overlapStart	0	72780	Rspo3	29535870	17.1187558654596	-1.83713891109838	0.492054858622247	-3.73360587525213	0.000188757792389567	0.00073448853316363	gained-close
Peak_5206	chr1	171441802	171442128	327	171423185	171437318	upstream	4483	102638632	Gm26641	171442128	28.1984296876903	1.57509799944717	0.422785840389247	3.72552211776302	0.000194911360379286	0.000755357371786119	gained-open
Peak_33620	chr15	89182340	89182488	149	89155546	89180788	upstream	1551	140570	Plxnb2	89182488	23.0680523335264	-1.61899015694266	0.434690953172252	-3.72446250635704	0.000195731798251295	0.000758039285713945	gained-close
Peak_87556	chr9	15112163	15112375	213	15051841	15112108	upstream	54	244698	Hephl1	15112375	24.4634423113756	-1.53466350486127	0.412378322259956	-3.72149412813664	0.000198047471863721	0.000765754418961061	gained-close
Peak_55854	chr3	9400933	9401124	192	9403078	9437233	upstream	1953	320088	C030034L19Rik	9401124	18.2126560060143	1.85716438037816	0.500527619051793	3.7104133911659	0.000206921079814909	0.000795633261385282	gained-open
Peak_8879	chr10	75824565	75824694	130	75814943	75822543	upstream	2021	75886	Gstt4	75824694	23.7377359042672	-1.55079209823647	0.418766045653346	-3.70324221443735	0.000212861469920376	0.000815335528696994	gained-close
Peak_84322	chr8	68734937	68735371	435	68356781	68735146	overlapStart	0	234356	Csgalnact1	68735371	21.8272222212281	-1.5785209226894	0.426713361902505	-3.69925355899695	0.000216234490228355	0.000826916212560887	gained-close
Peak_91077	chr9	99306271	99306571	301	99299007	99304673	upstream	1597	73774	4930422M22Rik	99306571	15.7220454742651	1.95825587197712	0.530594702751588	3.69068115799476	0.000223654338693641	0.000851264980948287	gained-open
Peak_77573	chr7	24760001	24760420	420	24743983	24760311	overlapStart	0	68891	Cd177	24760420	71.737340051822	2.05845579929821	0.561551269655676	3.6656595942885	0.00024670190257055	0.000927752919449435	gained-open
Peak_21787	chr12	111184551	111184695	145	111159850	111184491	upstream	59	78062	4930595D18Rik	111184695	18.3603093449371	-1.83692117023338	0.504821002949233	-3.63875741996041	0.000273956700683794	0.00101718789736621	gained-close
Peak_15794	chr11	90390878	90391019	142	90336535	90390917	overlapStart	0	217082	Hlf	90391019	22.9038700087353	-1.6228493552192	0.446337610233775	-3.63592338626632	0.000276986651677292	0.00102718823913535	gained-close
Peak_85712	chr8	104827049	104827197	149	104831644	104838652	upstream	4446	234669	Ces2b	104827197	17.7019570880107	-1.71047767837715	0.470710821715501	-3.63381847084657	0.00027925737433653	0.00103483835317202	gained-close
Peak_91251	chr9	103761727	103762031	305	103482936	103761837	overlapStart	0	81907	Tmem108	103762031	23.5101034970471	-1.57217283174104	0.434846649955272	-3.61546497346306	0.000299809011862162	0.0011027460587159	gained-close
Peak_4009	chr1	138975875	138976268	394	138977657	138979246	upstream	1388	78229	4930596I21Rik	138976268	23.2623491133733	1.58727484492511	0.439347490376246	3.61280052735891	0.000302907721939071	0.00111275921025775	gained-open
Peak_39973	chr17	35516630	35517235	606	35512735	35516824	overlapStart	0	106795	Tcf19	35517235	315.900560382552	-1.51767609352445	0.421370207790838	-3.60176411493669	0.000316065091753842	0.00115584283225605	gained-close
Peak_39973	chr17	35516630	35517235	606	35517116	35531015	overlapStart	0	240084	Cchcr1	35517235	315.900560382552	-1.51767609352445	0.421370207790838	-3.60176411493669	0.000316065091753842	0.00115584283225605	gained-close
Peak_79816	chr7	83747629	83747727	99	83643063	83745726	upstream	1902	16170	Il16	83747727	11.6008446588475	-2.32480311772079	0.645686507820396	-3.60051370063234	0.000317589092473264	0.00116066423289538	gained-close
Peak_88998	chr9	54537435	54537894	460	54538984	54545020	upstream	1089	244885	Sh2d7	54537894	26.0237010464759	1.60572894708962	0.445988451147391	3.60038234837377	0.000317749582797789	0.00116106048550337	gained-open
Peak_49117	chr2	27146227	27146371	145	27110379	27142477	upstream	3749	109349	Fam163b	27146371	12.0303432602731	-2.09842320344519	0.586929215528654	-3.57525771068513	0.000349883074110429	0.00126229028369337	gained-close
Peak_64252	chr4	133190965	133191230	266	133195655	133195716	upstream	4424	102466215	Mir7017	133191230	28.0183614602936	1.51601561877763	0.424855666880666	3.56830739697643	0.000359294825744851	0.00129186098678996	gained-open
Peak_19379	chr12	44325931	44326202	272	44328885	44601846	upstream	2682	319504	Nrcam	44326202	22.2926861348848	1.73857394522	0.489662933417029	3.55055248533446	0.000384423475856528	0.00137080273479638	gained-open
Peak_83126	chr8	13494360	13494619	260	13465374	13494535	overlapStart	0	14456	Gas6	13494619	19.6328038500209	-1.72251300844121	0.485828970686663	-3.54551315868759	0.00039184942276734	0.00139350097696978	gained-close
Peak_84323	chr8	68736427	68736618	192	68356781	68735146	upstream	1280	234356	Csgalnact1	68736618	19.2556638953236	-1.78609098399803	0.50400604649871	-3.54378880254684	0.000394421062698635	0.00140132939228132	gained-close
Peak_43627	chr18	60211920	60212120	201	60212077	60247820	overlapStart	0	240327	Gm4951	60212120	19.1596391242522	1.75021158327224	0.494050345840169	3.54257738712009	0.000396237143659593	0.00140656677847208	gained-open
Peak_29516	chr14	74638183	74638342	160	74640840	74706859	upstream	2497	15558	Htr2a	74638342	25.940185804682	1.52319602099586	0.430563108115994	3.53768354112101	0.000403653531171569	0.0014294608261283	gained-open
Peak_36504	chr16	38435090	38435351	262	38396117	38433145	upstream	1944	85031	Pla1a	38435351	19.8474732293987	1.68668329426559	0.477343839654431	3.53347661402031	0.00041013237220088	0.00145001618911157	gained-open
Peak_3662	chr1	133305986	133306165	180	133309823	133329722	upstream	3657	280287	Kiss1	133306165	18.5678619807643	-1.64598286536658	0.47078334728716	-3.49626399245296	0.000471821659863505	0.00163830140031736	gained-close
Peak_3662	chr1	133305986	133306165	180	133309823	133329722	upstream	3657	68338	Golt1a	133306165	18.5678619807643	-1.64598286536658	0.47078334728716	-3.49626399245296	0.000471821659863505	0.00163830140031736	gained-close
Peak_67800	chr5	66005851	66006002	152	65987928	66004285	upstream	1565	231253	9130230L23Rik	66006002	18.4208508398359	1.68254986479683	0.482676657473819	3.48587369773127	0.000490532547483908	0.00169363607851037	gained-open
Peak_4272	chr1	152396666	152396804	139	152399867	152510695	upstream	3062	269132	Colgalt2	152396804	15.5153540792477	-1.78913271263223	0.513765695409803	-3.48239037486755	0.000496958650031629	0.00171219891638051	gained-close
Peak_20371	chr12	80687840	80688060	221	80692601	80724216	upstream	4540	217682	Plekhd1	80688060	16.540934479257	-1.82577259925934	0.524766426621342	-3.47921000017932	0.000502894336315733	0.00172981462992606	gained-close
Peak_35092	chr16	16829341	16829490	150	16753016	16829363	overlapStart	0	50525	Spag6l	16829490	9.31665071034845	-2.73101650615079	0.786527903518461	-3.4722436342485	0.000516127705126641	0.00176864596027278	gained-close
Peak_65358	chr4	148597885	148598068	184	148602544	148615482	upstream	4475	17175	Masp2	148598068	13.903959825894	-1.86883001808086	0.538331986924898	-3.47151955200755	0.000517521643313232	0.0017726811324573	gained-close
Peak_83944	chr8	40861623	40861886	264	40862367	40922070	upstream	480	11988	Slc7a2	40861886	19.3197610100834	1.70774681660664	0.493856194440748	3.45798399580778	0.000544233713191255	0.00185287808967314	gained-open
Peak_56656	chr3	41496053	41496172	120	41487681	41493199	upstream	2853	78706	Platr4	41496172	16.4416915801029	-1.71711979834332	0.496966343343922	-3.45520339826111	0.000549877827627734	0.00186973876866439	gained-close
Peak_70944	chr5	138815793	138815994	202	138820080	138821619	upstream	4085	384244	Gm5294	138815994	28.3549612213491	1.50864658824799	0.439789924747617	3.43038005955629	0.000602736372991318	0.00202377789237089	gained-open
Peak_35559	chr16	23031149	23031275	127	22985852	23029101	upstream	2047	385643	Kng2	23031275	17.0995178035866	-1.69931833351127	0.495415940567318	-3.43008408563787	0.000603394231099304	0.00202571733950961	gained-close
Peak_64593	chr4	135685933	135686351	419	135686457	135708181	upstream	105	242700	Ifnlr1	135686351	20.1255843888928	1.56368690236228	0.458240712428349	3.41237009273108	0.000644006140879846	0.00214184226126973	gained-open
Peak_27388	chr14	26572109	26572221	113	26573858	26634322	upstream	1636	211922	Dennd6a	26572221	17.7468710474791	-1.62835888834016	0.478399979690811	-3.40376036259985	0.000664650361104495	0.00220206310848019	gained-close
Peak_17717	chr11	117425962	117426156	195	117420640	117421717	upstream	4244	667423	Gm8624	117426156	25.4439737328017	-1.52643368447128	0.449681817606616	-3.39447499255265	0.000687603194665567	0.00226861145253515	gained-close
Peak_92496	chr9	123801505	123801949	445	123806477	123811754	upstream	4527	80901	Cxcr6	123801949	25.241973849736	1.59744755351698	0.47062521423274	3.39430932556663	0.000688019323345306	0.00226963130180292	gained-open
Peak_91650	chr9	109571188	109571359	172	109552602	109568262	upstream	2925	382105	Fbxw15	109571359	16.5261021952148	1.76301993385182	0.519532535175213	3.39347358343446	0.000690122143684101	0.00227577453119238	gained-open
Peak_34314	chr15	101958932	101959132	201	101946004	101954287	upstream	4644	332131	Krt78	101959132	12.1382170640728	2.13091655990143	0.628145414606146	3.39239372023043	0.000692848045798275	0.0022834105142058	gained-open
Peak_63955	chr4	129686765	129686923	159	129684500	129684571	upstream	2193	102465615	Mir7016	129686923	16.8015491292255	1.846038761989	0.547874481974622	3.36945563760443	0.00075316813883942	0.00245357339427162	gained-open
Peak_53066	chr2	129182592	129182933	342	129178148	129180673	upstream	1918	100048701	AI847159	129182933	17.1956444982252	1.75113315305837	0.520741320644855	3.36276973544154	0.000771646992137213	0.00250547521347214	gained-open
Peak_43397	chr18	52690072	52690333	262	52693679	52695593	upstream	3345	14625	Gykl1	52690333	14.4617050068996	1.82063266879416	0.542903507105861	3.35351060541069	0.00079793355866274	0.0025804779603079	gained-open
Peak_40432	chr17	46546259	46546460	202	46500609	46546388	overlapStart	0	78309	Cul9	46546460	19.9385899287478	-1.5685804078188	0.468868166978211	-3.34546151411403	0.000821457584684252	0.00264579090513868	gained-close
Peak_81951	chr7	131542481	131542688	208	131542963	131544936	upstream	274	15373	Hmx3	131542688	19.1448149079481	-1.51784326609723	0.454070691956112	-3.34274660969295	0.000829536097628122	0.00266890297745982	gained-close
Peak_4798	chr1	162477940	162478095	156	161982456	162478034	overlapStart	0	103967	Dnm3	162478095	20.3974669334336	-1.53040893580946	0.458616269312213	-3.33701405339285	0.000846836661128012	0.00271754109978212	gained-close
Peak_66401	chr5	24351745	24351887	143	24319589	24351604	upstream	140	16511	Kcnh2	24351887	20.2181211771372	-1.54743554576789	0.465664396749969	-3.32307034114692	0.000890324607801337	0.0028385135083121	gained-close
Peak_38838	chr17	25316649	25316808	160	25318654	25322684	upstream	1845	114662	Prss29	25316808	19.1051894766645	-1.51919166049679	0.457714275258135	-3.31908297952915	0.000903135877670603	0.00287267837282403	gained-close
Peak_2839	chr1	93685526	93685692	167	93685575	93695770	overlapStart	0	51800	Bok	93685692	12.1058493810501	-2.12151051725304	0.640019744425811	-3.31475792072061	0.000917225194287952	0.00291259714465834	gained-close
Peak_54110	chr2	153937974	153938161	188	153940862	153963852	upstream	2700	381399	Bpifb4	153938161	16.6403578250634	-1.6166186942894	0.488271513186285	-3.31090110856545	0.000929960669049879	0.00294779397762289	gained-close
Peak_28043	chr14	46879486	46879645	160	46882965	47105817	upstream	3319	74480	Samd4	46879645	18.1346269820359	1.59023736264663	0.484084977391465	3.28503762131964	0.00101968755248583	0.00319506377605652	gained-open
Peak_10660	chr10	116674477	116674617	141	116674591	116679303	overlapStart	0	102633950	Gm26579	116674617	16.0338437952083	-1.69597188229947	0.518270904876268	-3.27236560328304	0.00106651564484695	0.00332341169619204	gained-close
Peak_23529	chr13	34130425	34130627	203	34127008	34130354	upstream	70	73710	Tubb2b	34130627	19.2362630765939	-1.55770539512297	0.476369860790705	-3.26994951472664	0.00107566680195682	0.003347847927951	gained-close
Peak_92539	chr9	124101867	124101981	115	124102183	124113557	upstream	201	12772	Ccr2	124101981	17.9448503315837	-1.56977822584524	0.484487769975207	-3.24007812607028	0.00119496953742062	0.00367323936891883	gained-close
Peak_17088	chr11	107637297	107637607	311	107637722	107637779	upstream	114	102465562	Mir6932	107637607	19.0998555020172	1.52540276467724	0.476517017447059	3.20115065952856	0.00136879941807812	0.00413120135732465	gained-open
Peak_50331	chr2	50905511	50905653	143	50909684	50911846	upstream	4030	227885	Gm13498	50905653	10.6114340467535	2.20139183275723	0.693458517208537	3.17451120453284	0.00150089096031885	0.00447871846429235	gained-open
Peak_91083	chr9	99362074	99362202	129	99309967	99358530	upstream	3543	272636	Esyt3	99362202	12.3366910970325	1.87447867348813	0.590486150676786	3.17446678696815	0.00150112069124257	0.00447926270669277	gained-open
Peak_45684	chr19	11690990	11691170	181	11667460	11691051	overlapStart	0	170834	Oosp1	11691170	19.2721465157137	-1.52934264097256	0.484076162402091	-3.15930169621167	0.00158147684463241	0.00468490726337969	gained-close
Peak_37876	chr16	97536030	97536318	289	97536081	97560901	overlapStart	0	17858	Mx2	97536318	17.095089018523	1.61835875332938	0.513567330150395	3.15121048072792	0.00162595271613182	0.00479911192574095	gained-open
Peak_36409	chr16	36692527	36692695	169	36693978	36726804	upstream	1282	106347	Ildr1	36692695	13.9827749881953	1.84039411587473	0.58474738746673	3.14733191686032	0.00164767806918908	0.00485441846761864	gained-open
Peak_61630	chr4	53241988	53242337	350	53246196	53251120	upstream	3858	78180	4930522O17Rik	53242337	19.112021512986	1.53239826146628	0.487636691256248	3.14249991631786	0.00167511761051132	0.00492605690404506	gained-open
Peak_32709	chr15	77537564	77537739	176	77524867	77533315	upstream	4248	108956	Apol7c	77537739	14.5330054694371	1.73220941340152	0.551893143605373	3.13866811623253	0.00169717549378317	0.00498184801143331	gained-open
Peak_34479	chr15	103900653	103900994	342	103895855	103899312	upstream	1340	20770	Mucl2	103900994	13.2502156471138	1.76762166181255	0.566702437780172	3.11913544740781	0.00181382559446837	0.00528176998519574	gained-open
Peak_34479	chr15	103900653	103900994	342	103751923	103899312	upstream	1340	20771	Mucl1	103900994	13.2502156471138	1.76762166181255	0.566702437780172	3.11913544740781	0.00181382559446837	0.00528176998519574	gained-open
Peak_14083	chr11	68961747	68961906	160	68943154	68956858	upstream	4888	442801	Arhgef15	68961906	16.0668518452276	-1.56847953422346	0.503080088210282	-3.117753158952	0.00182235361787363	0.00530250311781242	gained-close
Peak_5365	chr1	173628508	173628656	149	173630859	173647928	upstream	2202	236312	Ifi209	173628656	18.4618700237876	-1.50325113474587	0.485288847196579	-3.0976420402609	0.00195066891177765	0.00562294281132347	gained-close
Peak_62842	chr4	107092002	107092131	130	107096891	107107748	upstream	4759	242603	Cdcp2	107092131	17.3732492201345	-1.5158102862721	0.489593497058723	-3.0960588638911	0.00196111425915086	0.00564886503619146	gained-close
Peak_30128	chr14	104523576	104523755	180	104477534	104522666	upstream	909	72486	Rnf219	104523755	20.6420485343454	1.53836309275561	0.497274470911504	3.09358952197121	0.00197750881630815	0.00568990873101121	gained-open
Peak_9376	chr10	81205701	81205917	217	81198170	81202037	upstream	3663	69564	Nmrk2	81205917	18.0715715596403	1.55571791374631	0.503433931534363	3.09021267002166	0.00200013223735776	0.00574481741869052	gained-open
Peak_48895	chr2	25078955	25079234	280	25080323	25085719	upstream	1088	72090	Entpd8	25079234	18.0892017894522	1.50214877488695	0.488915625905961	3.07240901148019	0.00212338556760752	0.00605166485943897	gained-open
Peak_44416	chr18	77569823	77570103	281	77456110	77565136	upstream	4686	225743	Rnf165	77570103	15.0917487232684	-1.62670607629707	0.529564551931778	-3.07178052300342	0.00212786118071738	0.0060632852477031	gained-close
Peak_23161	chr13	24323520	24323670	151	24327404	24477289	upstream	3733	12763	Cmah	24323670	8.68314134750016	2.49641249874129	0.815923737708438	3.05961499018595	0.00221621691698845	0.00628480614036179	gained-open
Peak_54102	chr2	153779095	153779224	130	153780879	153795182	upstream	1654	100504221	Efcab8	153779224	11.8472313658992	-1.79603516226006	0.589292545612944	-3.04778191346701	0.00230537170947974	0.00649693166359965	gained-close
Peak_51498	chr2	90025270	90025395	126	90021138	90022064	upstream	3205	258206	Olfr1264	90025395	11.0554095050613	1.96787662102462	0.652037336708449	3.0180428485256	0.00254412929696007	0.00707370529207677	gained-open
Peak_89104	chr9	56024738	56025055	318	56027636	56031573	upstream	2580	665005	Gm7444	56025055	15.9237259657331	1.76228464201684	0.590862761357689	2.98256170005951	0.00285847025588189	0.00782053926817252	gained-open
Peak_46947	chr19	41523198	41523375	178	41525252	41526961	upstream	1876	627352	Morf4l1b	41523375	14.4750485410147	1.60881486437752	0.543961340744339	2.95759044599763	0.00310053773103295	0.00839283183353657	gained-open
Peak_39833	chr17	34477238	34477515	278	34469042	34475937	upstream	1300	632126	Btnl4	34477515	13.1597696122986	1.85413540418724	0.638686034802438	2.90304672899381	0.00369551491810516	0.00976995624821172	gained-open
Peak_33950	chr15	98235477	98235685	209	98226675	98234450	upstream	1026	629524	Olfr286	98235685	14.0304101210489	1.55243929569101	0.53586858600762	2.89705225539931	0.00376687006447654	0.00993140231641355	gained-open
Peak_67021	chr5	35019766	35019981	216	35021049	35021115	upstream	1067	100526557	Mir3097	35019981	11.2670393271639	1.70342505174725	0.610748721405976	2.78907673818109	0.0052858538788289	0.0132768748721754	gained-open
Peak_14057	chr11	68555976	68556127	152	68556186	68558245	upstream	58	215723	Mfsd6l	68556127	9.05307250935721	1.90824218961962	0.690269072539295	2.76449034953829	0.00570117935457697	0.0141662492519596	gained-open
Peak_67334	chr5	43982899	43983079	181	43978858	43981799	upstream	1099	14181	Fgfbp1	43983079	10.5622890634129	1.72723845900008	0.627233844935539	2.75373925202903	0.0058918688400571	0.0145673777828361	gained-open
Peak_55427	chr2	174295265	174295778	514	174281237	174295436	overlapStart	0	56802	Nespas	174295778	49.8694844904913	-2.02795764454725	0.737127581167862	-2.75116234469787	0.00593842051655956	0.0146633139685137	gained-close
Peak_76013	chr6	127882904	127883005	102	127887622	127953031	upstream	4616	68498	Tspan11	127883005	10.2270925860251	-1.6994776974887	0.619176773623438	-2.74473748028905	0.00605593203524942	0.0149102799252259	gained-close
Peak_92218	chr9	120933868	120934096	229	120924455	120930802	upstream	3065	78060	4930593C16Rik	120934096	93.5915035530697	1.5927017935956	0.584222814285373	2.72618897217118	0.00640703049107115	0.0156432209827159	gained-open
Peak_43940	chr18	65398550	65398848	299	65265529	65393888	upstream	4661	225638	Alpk2	65398848	14.1211550506744	1.5591248304407	0.580570222448818	2.68550602520464	0.00724200690042452	0.0173733975256507	gained-open
Peak_42339	chr18	11629007	11629170	164	11633276	11743207	upstream	4105	225182	Rbbp8	11629170	13.2020712139496	1.56651939659962	0.588240086556915	2.66306127786831	0.00774333117084256	0.0184047832763543	gained-open
Peak_3583	chr1	132296660	132296859	200	132298626	132307357	upstream	1766	213417	Klhdc8a	132296859	15.6537934124014	1.56567258860754	0.601760302457188	2.60182099452951	0.00927302397241428	0.0214662744918818	gained-open
Peak_48976	chr2	25696106	25696276	171	25700074	25703326	upstream	3797	227627	Obp2a	25696276	11.5222533557498	1.5688441745378	0.673611219522132	2.32900541005056	0.0198587790997531	0.0411620545431116	gained-open
Peak_61353	chr4	45292493	45292738	246	45297168	45316131	upstream	4429	69934	Trmt10b	45292738	8.13319120076545	-1.56295188412054	0.683278793242651	-2.28742923031931	0.0221707817814877	0.0451908687296812	gained-close
Peak_14203	chr11	69859284	69859547	264	69850563	69858730	upstream	553	83813	Tnk1	69859547	7.65010041654328	1.79244383430972	0.787922667977244	2.27489816851098	0.0229120392492829	0.0464495861058941	gained-open
Peak_45642	chr19	11134421	11134532	112	11096816	11130878	upstream	3542	69369	1700017D01Rik	11134532	8.2482723611296	1.55630211833905	0.707773260496741	2.19887103003409	0.0278870940650313	0.0548169798066934	gained-open
Peak_45430	chr19	8727737	8728277	541	8706882	8723369	upstream	4367	17254	Slc3a2	8728277	164.756377890367	-1.60843693292884	0.745192467849294	-2.15841812997783	0.0308953373963016	0.0597470266289428	gained-close

## Sheet: KO_d3_vs_d0
name	Chr	Peak Start	Peak End	length	Gene Start	Gene End	location	distance	Entrez id	Gene symbol	End	baseMean	log2FoldChange	lfcSE	stat	pvalue	padj	regulation
Peak_18306	chr13	54189996	54190185	190	54192129	54222432	upstream	1943	15466	Hrh2	54190185	1381.33733527783	-4.34888788792528	0.108737907376582	-39.9942209009428	0	0	gained-close
Peak_26915	chr16	35981601	35981819	219	35983363	36036162	upstream	1543	16646	Kpna1	35981819	7575.85318085807	-4.45662278715827	0.103153260513626	-43.2038964640346	0	0	gained-close
Peak_30928	chr17	83997639	83998345	707	83998552	84013408	upstream	206	78148	8430430B14Rik	83998345	1592.79522236809	-4.0702466695932	0.0972114450480774	-41.8700356483765	0	0	gained-close
Peak_41278	chr2	168010649	168011288	640	167980786	168010593	upstream	55	69553	Ripor3	168011288	1356.34704135058	-3.69087388031829	0.0967329902829458	-38.1552753566536	0	0	gained-close
Peak_12293	chr11	101604569	101605718	1150	101610700	101615956	upstream	4981	666331	LOC666331	101605718	846.399371034183	-3.78316709051121	0.105988275182678	-35.6942037597145	4.86266629819198e-279	1.06572929840968e-275	gained-close
Peak_12294	chr11	101627078	101628984	1907	101627949	101636081	overlapStart	0	66599	Rdm1	101628984	3313.28057336951	-2.75884531547803	0.0786548777538721	-35.0753239247418	1.60338241902548e-269	3.12361164426428e-266	gained-close
Peak_12524	chr11	106065696	106066839	1144	106066107	106073612	overlapStart	0	70207	Taco1	106066839	2762.28872132948	-3.00488119594832	0.0865147669918786	-34.7325815051943	2.53973250171987e-264	4.452976488578e-261	gained-close
Peak_33848	chr19	11640290	11641246	957	11629499	11640851	overlapStart	0	170813	Ms4a3	11641246	707.099345789009	-3.51858836564553	0.10443550440371	-33.6914958733184	7.7008077022606e-249	1.1022056052707e-245	gained-close
Peak_40962	chr2	165234181	165234920	740	165111507	165234737	overlapStart	0	104010	Cdh22	165234920	843.700789332892	-3.24141153612532	0.0966997536384996	-33.5203701577457	2.43389398186909e-246	3.34698601236127e-243	gained-close
Peak_2763	chr1	133800855	133801797	943	133702674	133800754	upstream	100	381290	Atp2b4	133801797	872.129974944105	-3.19303621018155	0.103794088114109	-30.7631799478907	8.14916387294452e-208	7.9378515264058e-205	gained-close
Peak_47183	chr4	118547155	118548714	1560	118540941	118543726	upstream	3428	230678	Tmem125	118548714	1378.99342007701	-2.95664031681449	0.100329488848112	-29.4693050942432	7.12416573946959e-191	6.09315994885635e-188	gained-close
Peak_67127	chr9	83805830	83806334	505	83778692	83806305	overlapStart	0	83603	Elovl4	83806334	629.200215486754	-3.979657883981	0.135434715032623	-29.3843264854391	8.70971064920284e-190	7.2718825828636e-187	gained-close
Peak_63166	chr8	84699902	84700367	466	84701457	84704716	upstream	1089	17095	Lyl1	84700367	551.322675468361	-3.17089606269685	0.111010881498072	-28.5638310398599	1.89147182468149e-179	1.42639347828373e-176	gained-close
Peak_1311	chr1	72243757	72245438	1682	72243993	72274869	overlapStart	0	320933	D230017M19Rik	72245438	1957.23629982271	-2.45609575514871	0.0867382730877582	-28.3161707942206	2.18528099630067e-176	1.54808396074298e-173	gained-close
Peak_26055	chr16	16864909	16865746	838	16860671	16863985	upstream	923	16136	Igll1	16865746	377.772684993775	-4.84549103883363	0.172859255421781	-28.0314237557631	6.72933321154349e-173	4.6727557042097e-170	gained-close
Peak_26055	chr16	16864909	16865746	838	16870736	16892986	upstream	4989	21976	Top3b	16865746	377.772684993775	-4.84549103883363	0.172859255421781	-28.0314237557631	6.72933321154349e-173	4.6727557042097e-170	gained-close
Peak_59890	chr7	104169620	104170551	932	104153013	104164816	upstream	4803	244180	Olfm5	104170551	317.453127284958	-4.13172847966384	0.154947811276997	-26.6652910138733	1.1898728887677e-156	6.78450043154024e-154	gained-close
Peak_13678	chr12	8770987	8773717	2731	8771396	8793688	overlapStart	0	20969	Sdc1	8773717	878.54242816529	-2.44705325091882	0.0922472773238235	-26.5271054269572	4.71926830002617e-155	2.64781154948588e-152	gained-close
Peak_6832	chr10	79877215	79878323	1109	79879667	79883174	upstream	1343	19152	Prtn3	79878323	1334.91614387427	-2.67926246655568	0.102454526494217	-26.1507476363858	9.66413839175173e-151	4.98363983697591e-148	gained-close
Peak_6832	chr10	79877215	79878323	1109	79860475	79874634	upstream	2580	216152	Plppr3	79878323	1334.91614387427	-2.67926246655568	0.102454526494217	-26.1507476363858	9.66413839175173e-151	4.98363983697591e-148	gained-close
Peak_61748	chr8	18950231	18951288	1058	18932729	18950975	overlapStart	0	319581	Xkr5	18951288	619.917525691259	-2.69731898209114	0.104437415212521	-25.8271327052889	4.39692860772017e-147	2.15643212619048e-144	gained-close
Peak_21229	chr14	56105108	56106091	984	56099885	56102574	upstream	2533	13035	Ctsg	56106091	400.837406695824	-3.45335486651544	0.134828953560909	-25.6128581829822	1.09701933686909e-144	5.16357430554629e-142	gained-close
Peak_9202	chr11	31368740	31370511	1772	31359441	31370061	overlapStart	0	20856	Stc2	31370511	1000.33215667448	-2.43194233721111	0.0958847838485544	-25.3631727537942	6.43131508469633e-142	2.92887935607148e-139	gained-close
Peak_21228	chr14	56102105	56102757	653	56099885	56102574	overlapStart	0	13035	Ctsg	56102757	273.774442934384	-4.63874612628661	0.184531821428382	-25.1379197928035	1.91568849430787e-139	8.61237058790346e-137	gained-close
Peak_31863	chr18	36196684	36197785	1102	36017649	36197160	overlapStart	0	100042150	Nrg2	36197785	439.388165863584	-2.83701075319091	0.116545904378375	-24.3424320084242	6.97237726773163e-131	2.81030882136679e-128	gained-close
Peak_34285	chr19	28679479	28680335	857	28258851	28680077	overlapStart	0	226075	Glis3	28680335	396.226326008527	-3.03580002626001	0.125780973247589	-24.1356061085989	1.05755739241395e-128	4.05298757388893e-126	gained-close
Peak_8461	chr11	3288626	3292543	3918	3289131	3309083	overlapStart	0	56218	Patz1	3292543	2043.80589976526	-1.69956190655596	0.0712943639338855	-23.8386572623335	1.3277618461656e-125	4.82486640192393e-123	gained-close
Peak_3825	chr1	171063755	171065783	2029	171064591	171064652	includeFeature	0	102466998	Mir6546	171065783	4168.67576979612	-1.59999771580174	0.0681458750520295	-23.4790104988768	6.68395767545324e-122	2.34383001826281e-119	gained-close
Peak_3825	chr1	171063755	171065783	2029	171051169	171059403	upstream	4351	14131	Fcgr3	171065783	4168.67576979612	-1.59999771580174	0.0681458750520295	-23.4790104988768	6.68395767545324e-122	2.34383001826281e-119	gained-close
Peak_8456	chr11	3196046	3196813	768	3131850	3193463	upstream	2582	78887	Sfi1	3196813	437.887313949103	-3.10391867225769	0.132876670857497	-23.3593952364028	1.10619181084314e-120	3.80296815048344e-118	gained-close
Peak_44283	chr3	121426110	121427350	1241	121426541	121458205	overlapStart	0	71994	Cnn3	121427350	494.962990666768	-2.79805977660756	0.120846642503015	-23.153806499322	1.33090080991661e-118	4.55317397570155e-116	gained-close
Peak_39275	chr2	127335622	127336812	1191	127336159	127338377	overlapStart	0	13537	Dusp2	127336812	1789.61187403808	-2.07769094707673	0.0901327037391984	-23.0514659039697	1.4219395899847e-117	4.7944658300191e-115	gained-close
Peak_39275	chr2	127335622	127336812	1191	127338639	127357655	upstream	1826	215095	Astl	127336812	1789.61187403808	-2.07769094707673	0.0901327037391984	-23.0514659039697	1.4219395899847e-117	4.7944658300191e-115	gained-close
Peak_6835	chr10	79883157	79885133	1977	79886312	79888216	upstream	1178	50701	Elane	79885133	950.859145404625	-2.43199130665401	0.105901414834556	-22.9646724782042	1.05142258417876e-116	3.52820191847889e-114	gained-close
Peak_35264	chr19	53889532	53890061	530	53892231	53929861	upstream	2169	18569	Pdcd4	53890061	390.360566853607	-3.05422930509338	0.1353714186227	-22.5618475167639	1.02741107957289e-112	3.32052632459381e-110	gained-close
Peak_58548	chr7	52005513	52006523	1011	51997161	52006018	overlapStart	0	75744	Svip	52006523	1119.38970099769	-2.1903033687701	0.0973431466114879	-22.5008482365168	4.07200241822546e-112	1.29809884362457e-109	gained-close
Peak_17106	chr13	23534866	23535795	930	23535418	23535909	overlapStart	0	97908	Hist1h3g	23535795	1919.70997311561	-1.81313746095611	0.0808239105717807	-22.4331815687864	1.86790563221125e-111	5.84829579035142e-109	gained-close
Peak_49108	chr5	8622233	8623498	1266	8490336	8622952	overlapStart	0	242819	Rundc3b	8623498	702.409858503176	-2.22053462195813	0.0989909105593273	-22.4317021574149	1.93106240449169e-111	6.00160384905587e-109	gained-close
Peak_34809	chr19	42128639	42129812	1174	42123275	42128993	overlapStart	0	69534	Avpi1	42129812	1829.14173616335	-1.6316419725922	0.0727844075416859	-22.4174658790443	2.65898718227803e-111	8.21509903324691e-109	gained-close
Peak_38327	chr2	93027041	93028373	1333	93029348	93033445	upstream	974	433456	4631405J19Rik	93028373	395.536790273906	-3.02862390912841	0.135683704875092	-22.3212058656308	2.30002262314721e-110	7.01336898387753e-108	gained-close
Peak_34780	chr19	41846771	41848787	2017	41845972	41848132	overlapStart	0	212398	Frat2	41848787	1567.79816471665	-1.80307742623093	0.0808087733499392	-22.3128919235388	2.76995941296559e-110	8.4097646540916e-108	gained-close
Peak_35492	chr19	59344329	59346273	1945	59296084	59345780	overlapStart	0	107368	Pdzd8	59346273	2050.77987710896	-1.79248079582617	0.0804177564037696	-22.2896145824599	4.65986351370988e-110	1.40261891762667e-107	gained-close
Peak_17038	chr13	21779114	21780723	1610	21779832	21780625	includeFeature	0	56702	Hist1h1b	21780723	1692.03696153024	-1.70058455166454	0.0763664508749929	-22.2687388529852	7.42619409958929e-110	2.21626072675105e-107	gained-close
Peak_29070	chr17	28518117	28519135	1019	28398753	28517524	upstream	592	14229	Fkbp5	28519135	622.746864753641	-2.75055895832312	0.123893706118995	-22.2009579379384	3.36209056588106e-109	9.90728981751833e-107	gained-close
Peak_7055	chr10	81600691	81601332	642	81590905	81600900	overlapStart	0	114606	Tle6	81601332	925.502803939804	-2.13595960026649	0.0975235176348285	-21.9019950476404	2.48651802243097e-106	7.08890115720127e-104	gained-close
Peak_7055	chr10	81600691	81601332	642	81606308	81609836	upstream	4975	268319	BC025920	81601332	925.502803939804	-2.13595960026649	0.0975235176348285	-21.9019950476404	2.48651802243097e-106	7.08890115720127e-104	gained-close
Peak_59780	chr7	101108001	101109186	1186	101108775	101284405	overlapStart	0	207278	Fchsd2	101109186	1501.37438203241	-1.67483172224778	0.0765026138111216	-21.8924771169623	3.06403474478115e-106	8.69999792533345e-104	gained-close
Peak_5298	chr10	21160659	21161572	914	21124930	21160984	overlapStart	0	17863	Myb	21161572	346.64016029118	-2.94447999398331	0.134613897733866	-21.8735215572213	4.64318120243472e-106	1.30779207739098e-103	gained-close
Peak_27433	chr16	64851315	64852589	1275	64852085	64859491	overlapStart	0	106143	Cggbp1	64852589	3902.21541332124	-1.61229650517249	0.0738926952612844	-21.8194301814464	1.51738170607757e-105	4.23978211921667e-103	gained-close
Peak_27433	chr16	64851315	64852589	1275	64780347	64851652	overlapStart	0	72020	Zfp654	64852589	3902.21541332124	-1.61229650517249	0.0738926952612844	-21.8194301814464	1.51738170607757e-105	4.23978211921667e-103	gained-close
Peak_29579	chr17	35000063	35002274	2212	34996724	35000958	overlapStart	0	110956	D17H6S56E-5	35002274	2034.75364330499	-1.79416827550951	0.0822942894755846	-21.8018563249374	2.22795872649992e-105	6.15170981754405e-103	gained-close
Peak_29579	chr17	35000063	35002274	2212	35000907	35016329	overlapStart	0	22321	Vars	35002274	2034.75364330499	-1.79416827550951	0.0822942894755846	-21.8018563249374	2.22795872649992e-105	6.15170981754405e-103	gained-close
Peak_17036	chr13	21753302	21754823	1522	21750145	21750553	upstream	2748	319160	Hist1h4k	21754823	2817.51438898117	-1.57888667067027	0.0725834931807378	-21.7526961225018	6.51370938999844e-105	1.78447648690922e-102	gained-close
Peak_17036	chr13	21753302	21754823	1522	21753377	21753912	includeFeature	0	319169	Hist1h2ak	21754823	2817.51438898117	-1.57888667067027	0.0725834931807378	-21.7526961225018	6.51370938999844e-105	1.78447648690922e-102	gained-close
Peak_17036	chr13	21753302	21754823	1522	21754123	21754553	includeFeature	0	319187	Hist1h2bn	21754823	2817.51438898117	-1.57888667067027	0.0725834931807378	-21.7526961225018	6.51370938999844e-105	1.78447648690922e-102	gained-close
Peak_1874	chr1	88276823	88278124	1302	88258856	88277579	overlapStart	0	381280	Hjurp	88278124	4029.82965431812	-1.55036738816198	0.0713210141565134	-21.7378763678221	8.99660751537223e-105	2.45509367655876e-102	gained-close
Peak_43556	chr3	95881921	95883251	1331	95878505	95882228	overlapStart	0	229599	Ciart	95883251	1660.08012644693	-1.72288725254572	0.0795828068600005	-21.648988274271	6.21291724863427e-104	1.68235724092072e-101	gained-close
Peak_45246	chr4	11190479	11192385	1907	11191351	11204779	overlapStart	0	12448	Ccne2	11192385	1818.07146723083	-1.5815694075755	0.0733278501746095	-21.5684682396858	3.55264178361077e-103	9.47366639581651e-101	gained-close
Peak_8433	chr11	3123299	3124402	1104	3124021	3131945	overlapStart	0	236604	Pisd-ps1	3124402	11624.2766162063	-1.60071372582367	0.0751324379743276	-21.3052280610225	1.01531918041458e-100	2.57066354079479e-98	gained-close
Peak_33491	chr19	5988749	5989747	999	5970234	5986143	upstream	2605	381203	Slc22a20	5989747	796.419290966661	-2.17238902469323	0.102785432219947	-21.1351840214536	3.77713443563143e-99	9.36048655032293e-97	gained-close
Peak_33534	chr19	6398581	6399820	1240	6400583	6415216	upstream	762	19395	Rasgrp2	6399820	403.53732524186	-2.91693484192075	0.138702665425784	-21.0301282456719	3.47709167175216e-98	8.5265339236012e-96	gained-close
Peak_63167	chr8	84701090	84701952	863	84701457	84704716	overlapStart	0	17095	Lyl1	84701952	1436.44038595401	-2.12130855369964	0.100996655772163	-21.0037504458075	6.06070598014501e-98	1.47588712675524e-95	gained-close
Peak_22431	chr14	105896000	105897657	1658	105891947	105896819	overlapStart	0	24064	Spry2	105897657	784.053536157437	-1.95532038817191	0.0931146735499709	-20.9990575451308	6.68994898960936e-98	1.61788342237336e-95	gained-close
Peak_58228	chr7	44304513	44305650	1138	44310264	44358353	upstream	4613	243961	Shank1	44305650	3623.44024826482	-1.63476096549193	0.0779679802261325	-20.9670811113818	1.310622157255e-97	3.15868947610875e-95	gained-close
Peak_26748	chr16	32608545	32609700	1156	32608896	32632794	overlapStart	0	22042	Tfrc	32609700	1621.47951427426	-2.08528547806819	0.0998337415385414	-20.887582153406	6.94474093360403e-97	1.6454578239745e-94	gained-close
Peak_29587	chr17	35046500	35047421	922	35050243	35058719	upstream	2821	114584	Clic1	35047421	1928.4182117767	-1.51258327891057	0.0726019803229922	-20.8339121354731	2.13305951151666e-96	4.97002866183383e-94	gained-close
Peak_29587	chr17	35046500	35047421	922	35028605	35046745	overlapStart	0	17687	Msh5	35047421	1928.4182117767	-1.51258327891057	0.0726019803229922	-20.8339121354731	2.13305951151666e-96	4.97002866183383e-94	gained-close
Peak_54070	chr6	40890672	40891898	1227	40878794	40887494	upstream	3177	194357	Moxd2	40891898	1053.36454955916	-1.87526921310667	0.0901555842564006	-20.8003667057766	4.29512778605969e-96	9.9745098350902e-94	gained-close
Peak_4398	chr1	183299173	183299564	392	183276342	183297256	upstream	1916	71678	Brox	183299564	223.226680383648	-3.27137202547386	0.158675593844209	-20.6167309427924	1.9424850174622e-94	4.42312667953495e-92	gained-close
Peak_31125	chr17	87797523	87798673	1151	87745821	87797994	overlapStart	0	210741	Kcnk12	87798673	477.981605546086	-2.28965349580386	0.111303722180701	-20.5712212578715	4.96986664902243e-94	1.12799889221971e-91	gained-close
Peak_64352	chr8	122463476	122464323	848	122454206	122460692	upstream	2783	30927	Snai3	122464323	788.375686702078	-2.05080944421035	0.101243803688515	-20.2561477294931	3.13556961404543e-91	6.93712630100468e-89	gained-close
Peak_9203	chr11	31371374	31371875	502	31359441	31370061	upstream	1312	20856	Stc2	31371875	228.867044755044	-3.20585005361829	0.158474973307619	-20.2293774638809	5.39801378362844e-91	1.18676771375302e-88	gained-close
Peak_63433	chr8	94172076	94173482	1407	94172618	94173567	overlapStart	0	17750	Mt2	94173482	1477.75756514922	-1.66676732721085	0.0825320549935863	-20.1953935030501	1.07467264980148e-90	2.35531302964147e-88	gained-close
Peak_32119	chr18	46745446	46746198	753	46732417	46741579	upstream	3866	67526	Atg12	46746198	712.908650201387	-2.40504723877699	0.120128239935982	-20.0206649165814	3.63833302833044e-89	7.6857593456596e-87	gained-close
Peak_51074	chr5	100571965	100572547	583	100553733	100572205	overlapStart	0	231507	Plac8	100572547	184.408907235574	-5.00989929931577	0.250694494512007	-19.9840818565556	7.57681972220947e-89	1.59413587045811e-86	gained-close
Peak_25523	chr15	103258045	103258758	714	103248212	103258403	overlapStart	0	18022	Nfe2	103258758	1674.93562261007	-1.63768943981577	0.082679158155055	-19.8077662661305	2.55155427762457e-87	5.15700738192057e-85	gained-close
Peak_6900	chr10	80329488	80330246	759	80321283	80329473	upstream	14	18551	Pcsk4	80330246	1511.09863366134	-1.69914228892939	0.0858540405286451	-19.7910579218747	3.55500943371956e-87	7.16446771882339e-85	gained-close
Peak_6900	chr10	80329488	80330246	759	80330145	80336441	overlapStart	0	70335	Reep6	80330246	1511.09863366134	-1.69914228892939	0.0858540405286451	-19.7910579218747	3.55500943371956e-87	7.16446771882339e-85	gained-close
Peak_13719	chr12	11209445	11210417	973	11208382	11208948	upstream	496	56184	Msgn1	11210417	229.191943279821	-2.9687563636787	0.150614361942858	-19.7109779265607	1.73579930396444e-86	3.45843217570847e-84	gained-close
Peak_35896	chr2	14055033	14056459	1427	13850282	14056035	overlapStart	0	30963	Hacd1	14056459	943.575354286757	-2.24181519577876	0.113854328048747	-19.6902061976855	2.61622480491704e-86	5.18315520461148e-84	gained-close
Peak_58083	chr7	35333538	35334343	806	35334237	35392287	overlapStart	0	52428	Rhpn2	35334343	1647.90389873268	-1.68257213317931	0.085467576881975	-19.6866717714816	2.80526582432599e-86	5.54201994528041e-84	gained-close
Peak_39293	chr2	127523588	127524992	1405	127456498	127522094	upstream	1493	56461	Kcnip3	127524992	623.676438842259	-2.12924194017564	0.108510704115847	-19.6224138210591	9.95138362455106e-86	1.94406793242518e-83	gained-close
Peak_39158	chr2	125247178	125248221	1044	125247248	125259049	overlapStart	0	110074	Dut	125248221	1919.65137248311	-1.53227860781036	0.0782135452385688	-19.5909621937807	1.84667114708379e-85	3.58760630355754e-83	gained-close
Peak_54319	chr6	51270430	51271301	872	51269812	51269910	upstream	519	387166	Mir148a	51271301	384.987919455092	-2.31193885552801	0.118053046718505	-19.5838982541534	2.12146702719777e-85	4.11007864691881e-83	gained-close
Peak_17108	chr13	23542491	23545243	2753	23544052	23544954	includeFeature	0	260423	Hist1h3f	23545243	3080.52594122281	-1.51510390210376	0.0776362410008972	-19.5154206665705	8.11980404074019e-85	1.55167906482079e-82	gained-close
Peak_17108	chr13	23542491	23545243	2753	23542923	23543444	includeFeature	0	319182	Hist1h2bh	23545243	3080.52594122281	-1.51510390210376	0.0776362410008972	-19.5154206665705	8.11980404074019e-85	1.55167906482079e-82	gained-close
Peak_17072	chr13	22035017	22036621	1605	22035122	22035643	includeFeature	0	319168	Hist1h2ah	22036621	2580.64196490292	-1.58520574552216	0.0812715722584715	-19.5050458785351	9.94678674776212e-85	1.89050947149269e-82	gained-close
Peak_17072	chr13	22035017	22036621	1605	22035821	22036320	includeFeature	0	319184	Hist1h2bk	22036621	2580.64196490292	-1.58520574552216	0.0812715722584715	-19.5050458785351	9.94678674776212e-85	1.89050947149269e-82	gained-close
Peak_11843	chr11	95336641	95337071	431	95337018	95381872	overlapStart	0	215512	Fam117a	95337071	740.422940764667	-1.91725508556067	0.0987285500814009	-19.4194595583538	5.28430814346866e-84	9.93577434385757e-82	gained-close
Peak_23968	chr15	66968808	66970270	1463	66929318	66969641	overlapStart	0	17988	Ndrg1	66970270	1310.05407599769	-1.50037223598199	0.0773618763260501	-19.3942069044255	8.63747374832741e-84	1.61109560210491e-81	gained-close
Peak_13764	chr12	12941540	12942074	535	12936093	12941836	overlapStart	0	18109	Mycn	12942074	155.185780705376	-4.81233603174843	0.248596531510119	-19.3580175978945	1.74471467315571e-83	3.24567836001138e-81	gained-close
Peak_24515	chr15	79834020	79834634	615	79823898	79834333	overlapStart	0	494448	Cbx6	79834634	291.525714808194	-2.66345963013901	0.137710400626529	-19.3410201264486	2.42627640552791e-83	4.48976367147464e-81	gained-close
Peak_24515	chr15	79834020	79834634	615	79786351	79834333	overlapStart	0	504193	Npcd	79834634	291.525714808194	-2.66345963013901	0.137710400626529	-19.3410201264486	2.42627640552791e-83	4.48976367147464e-81	gained-close
Peak_47542	chr4	128654437	128655234	798	128654702	128752881	overlapStart	0	54383	Phc2	128655234	237.439228752727	-2.88570603192729	0.149781253138099	-19.2661362584986	1.03371382988983e-82	1.88795447999123e-80	gained-close
Peak_51358	chr5	107723762	107726568	2807	107716655	107726247	overlapStart	0	14581	Gfi1	107726568	990.388793079426	-1.91802257815929	0.0997393334573914	-19.2303528775703	2.06220209374675e-82	3.72753658352424e-80	gained-close
Peak_5010	chr10	12867921	12869638	1718	12382188	12869365	overlapStart	0	22288	Utrn	12869638	1422.17213773576	-1.54534310874046	0.0803984083277949	-19.2210659499613	2.46650613560739e-82	4.42412979050007e-80	gained-close
Peak_41978	chr3	19953626	19954607	982	19957054	20009750	upstream	2446	12870	Cp	19954607	386.530102372208	-2.59866723244832	0.135339805347338	-19.2010563764228	3.62641213277635e-82	6.45510563725899e-80	gained-close
Peak_13963	chr12	24707533	24708984	1452	24708254	24714146	overlapStart	0	20135	Rrm2	24708984	1235.47321590051	-1.59933353092555	0.0833188358165176	-19.195341788591	4.0481080756198e-82	7.18749275107453e-80	gained-close
Peak_59481	chr7	97737796	97738479	684	97726379	97738247	overlapStart	0	66333	Aqp11	97738479	865.248607376342	-1.8847127467494	0.0982364588226041	-19.185471151325	4.89484577064325e-82	8.64710877663786e-80	gained-close
Peak_54198	chr6	48593318	48594678	1361	48593883	48599082	overlapStart	0	58887	Repin1	48594678	972.876849567177	-1.71938026662365	0.0897660575757263	-19.1540133660564	8.96073813125215e-82	1.57110861839777e-79	gained-close
Peak_3826	chr1	171066590	171066812	223	171064591	171064652	upstream	1937	102466998	Mir6546	171066812	448.886516120461	-2.16437940347861	0.114024999781873	-18.9816216410349	2.42009875119793e-80	4.12965415371689e-78	gained-close
Peak_52189	chr5	124095391	124096234	844	124061857	124095798	overlapStart	0	56325	Abcb9	124096234	1218.39226799986	-1.74296350068157	0.092747012362202	-18.7926646507473	8.67140010766776e-79	1.44453991389801e-76	gained-close
Peak_28665	chr17	23725870	23727202	1333	23726336	23736729	overlapStart	0	268930	Pkmyt1	23727202	1869.57258503875	-1.74399223580625	0.0929521320225628	-18.7622617992552	1.53717091248813e-78	2.53066684520023e-76	gained-close
Peak_29105	chr17	28855582	28856724	1143	28858411	28890308	upstream	1686	433091	Pnpla1	28856724	462.759691182226	-2.06623100769889	0.11028265767851	-18.7357745197095	2.52934138249175e-78	4.13497200881805e-76	gained-close
Peak_17039	chr13	21782634	21783545	912	21782915	21783397	includeFeature	0	319153	Hist1h3i	21783545	1299.87631476511	-1.50998847293345	0.0807801923683721	-18.6925585179055	5.69168685823871e-78	9.19758236011187e-76	gained-close
Peak_17039	chr13	21782634	21783545	912	21787488	21789213	upstream	3942	319188	Hist1h2bp	21783545	1299.87631476511	-1.50998847293345	0.0807801923683721	-18.6925585179055	5.69168685823871e-78	9.19758236011187e-76	gained-close
Peak_17039	chr13	21782634	21783545	912	21779832	21780625	upstream	2008	56702	Hist1h1b	21783545	1299.87631476511	-1.50998847293345	0.0807801923683721	-18.6925585179055	5.69168685823871e-78	9.19758236011187e-76	gained-close
Peak_6918	chr10	80538821	80539637	817	80519585	80539124	overlapStart	0	67331	Atp8b3	80539637	987.293755890702	-1.79092880009646	0.0963209804508151	-18.5933406378787	3.63797544322623e-77	5.78553586756883e-75	gained-close
Peak_24968	chr15	89478236	89478765	530	89472476	89477424	upstream	811	11883	Arsa	89478765	214.873071381761	-3.72389658501829	0.201926933163198	-18.441802322668	6.06843230868534e-76	9.39508527825671e-74	gained-close
Peak_68763	chrX	20425201	20426385	1185	20425688	20519939	overlapStart	0	382207	Jade3	20426385	825.035676522157	-1.75675193655973	0.0952774855620887	-18.4382692951623	6.47818216856666e-76	9.98537033028759e-74	gained-close
Peak_18182	chr13	51644768	51646050	1283	51645232	51650662	overlapStart	0	66197	Cks2	51646050	2026.39763378626	-1.5090711290912	0.0828900976699264	-18.2056864633025	4.65185978006591e-74	6.89743936480681e-72	gained-close
Peak_29816	chr17	44105310	44106089	780	44096309	44105808	overlapStart	0	224794	Enpp4	44106089	482.010075877001	-2.07859165436832	0.114362797696859	-18.1754180225463	8.08104181612396e-74	1.18072438685463e-71	gained-close
Peak_8809	chr11	11808653	11809488	836	11787431	11808962	overlapStart	0	60530	Fignl1	11809488	834.841797538576	-1.5669075428022	0.0864306647997487	-18.1290696586977	1.87911431673701e-73	2.72852845498378e-71	gained-close
Peak_6980	chr10	81036934	81037566	633	81028540	81037250	overlapStart	0	106947	Slc39a3	81037566	977.534521052818	-1.58260387835584	0.0874636773285322	-18.0944127516071	3.52683018492981e-73	5.08944817612515e-71	gained-close
Peak_57574	chr7	24476995	24478966	1972	24482023	24504533	upstream	3056	260299	Cadm4	24478966	351.608298234346	3.26449856481934	0.180837182807479	18.05214234229	7.58891835675237e-73	1.09064264572564e-70	gained-open
Peak_21318	chr14	59625144	59626295	1152	59625281	59631660	overlapStart	0	219134	Shisa2	59626295	335.003059206289	-2.21021548615402	0.122631315336684	-18.0232551537581	1.27986445421926e-72	1.81701890218137e-70	gained-close
Peak_36230	chr2	25465769	25466669	901	25459488	25461094	upstream	4674	227622	Paxx	25466669	439.346667815326	-1.997475183255	0.111352350616547	-17.9383297451304	5.92081835230947e-72	8.20641805340949e-70	gained-close
Peak_2537	chr1	128416630	128417684	1055	128363707	128417416	overlapStart	0	226414	Dars	128417684	863.187699376945	-1.64358813918732	0.0918774847511355	-17.8889109082517	1.43893270523115e-71	1.95954694011604e-69	gained-close
Peak_54197	chr6	48588349	48589647	1299	48589445	48590584	overlapStart	0	330305	Gm5111	48589647	316.483138139653	-2.5519894537387	0.14281965656731	-17.8686149727294	2.07071940524226e-71	2.80900897578057e-69	gained-close
Peak_54197	chr6	48588349	48589647	1299	48593883	48599082	upstream	4235	58887	Repin1	48589647	316.483138139653	-2.5519894537387	0.14281965656731	-17.8686149727294	2.07071940524226e-71	2.80900897578057e-69	gained-close
Peak_30990	chr17	84506205	84507012	808	84511895	84622142	upstream	4882	213556	Plekhh2	84507012	151.821912754719	-4.33307090738707	0.243569578537288	-17.7898690526482	8.46775542531683e-71	1.13333796038883e-68	gained-close
Peak_40513	chr2	155929774	155930885	1112	155846886	155930310	overlapStart	0	56046	Uqcc1	155930885	1180.70414327232	-1.5049156069689	0.0850689319026803	-17.6905431079179	4.95951031500522e-70	6.48927867392278e-68	gained-close
Peak_8651	chr11	5949473	5950235	763	5900820	5950081	overlapStart	0	103988	Gck	5950235	529.242021820789	-1.7747420415294	0.10068052925653	-17.6274603901557	1.51626407008325e-69	1.96562195983639e-67	gained-close
Peak_17035	chr13	21749860	21750863	1004	21750145	21750553	includeFeature	0	319160	Hist1h4k	21750863	1467.70473549807	-1.69423700537829	0.0961832508115839	-17.6146781386833	1.90067140791998e-69	2.45487638769156e-67	gained-close
Peak_17035	chr13	21749860	21750863	1004	21754123	21754553	upstream	3259	319187	Hist1h2bn	21750863	1467.70473549807	-1.69423700537829	0.0961832508115839	-17.6146781386833	1.90067140791998e-69	2.45487638769156e-67	gained-close
Peak_58041	chr7	34233673	34234601	929	34201327	34230336	upstream	3336	14751	Gpi1	34234601	1815.91373051501	-1.54670898923612	0.0882431877451995	-17.5278004881489	8.79046826624304e-69	1.11685128789207e-66	gained-close
Peak_43516	chr3	95497367	95499989	2623	95499210	95509387	overlapStart	0	13038	Ctsk	95499989	368.678459771185	2.63021124726968	0.150767710371778	17.4454546055242	3.72740934488721e-68	4.65150177197464e-66	gained-open
Peak_60703	chr7	127707908	127709591	1684	127666849	127708766	overlapStart	0	12055	Bcl7c	127709591	1152.53931913708	-1.55512770582001	0.0895218330239774	-17.3714908786942	1.35655041066792e-67	1.66036561869761e-65	gained-close
Peak_60703	chr7	127707908	127709591	1684	127712736	127718188	upstream	3144	13019	Ctf1	127709591	1152.53931913708	-1.55512770582001	0.0895218330239774	-17.3714908786942	1.35655041066792e-67	1.66036561869761e-65	gained-close
Peak_60703	chr7	127707908	127709591	1684	127708487	127708562	includeFeature	0	791073	Mir762	127709591	1152.53931913708	-1.55512770582001	0.0895218330239774	-17.3714908786942	1.35655041066792e-67	1.66036561869761e-65	gained-close
Peak_6579	chr10	75059303	75060693	1391	75060896	75184923	upstream	202	110279	Bcr	75060693	743.148760400671	-1.59849496667205	0.0924003508922959	-17.2996633804486	4.73145320824767e-67	5.69178401121841e-65	gained-close
Peak_64378	chr8	122700686	122701306	621	122625136	122699109	upstream	1576	12398	Cbfa2t3	122701306	181.129061830662	-3.06860545883064	0.17773035276593	-17.2655115520531	8.55424299845352e-67	1.02029715001793e-64	gained-close
Peak_13962	chr12	24706872	24707086	215	24708254	24714146	upstream	1167	20135	Rrm2	24707086	192.077592895183	-3.02820354823162	0.175679495345674	-17.2370915699252	1.39900396209803e-66	1.65737069043617e-64	gained-close
Peak_22443	chr14	115040356	115041183	828	115043671	115043754	upstream	2487	723905	Mir17	115041183	647.54982346956	-1.71447619868153	0.0994952280987271	-17.2317429834955	1.53456750574407e-66	1.81490426442409e-64	gained-close
Peak_44049	chr3	108020292	108020706	415	108012250	108017973	upstream	2318	14862	Gstm1	108020706	230.858701294186	-2.74621502344522	0.159490325011577	-17.2186935053639	1.92279768334266e-66	2.26641293993061e-64	gained-close
Peak_62619	chr8	69831979	69833171	1193	69832704	69872292	overlapStart	0	80720	Pbx4	69833171	612.315407977894	-1.68481402845177	0.0982077542637404	-17.1556109910338	5.70667147231357e-66	6.61530562591351e-64	gained-close
Peak_24159	chr15	75110792	75112563	1772	75108161	75111949	overlapStart	0	100041546	Ly6c2	75112563	666.350391552284	-1.90953203140497	0.111342570906924	-17.1500623333121	6.27850857787761e-66	7.26618221274407e-64	gained-close
Peak_48253	chr4	138249738	138251148	1411	138250411	138301973	overlapStart	0	16559	Kif17	138251148	606.307078819607	-1.74087263613547	0.101618914333206	-17.1313839314125	8.65706884414625e-66	9.98595738892285e-64	gained-close
Peak_48253	chr4	138249738	138251148	1411	138250411	138260968	overlapStart	0	230863	Sh2d5	138251148	606.307078819607	-1.74087263613547	0.101618914333206	-17.1313839314125	8.65706884414625e-66	9.98595738892285e-64	gained-close
Peak_5983	chr10	51480165	51481857	1693	51480612	51486329	overlapStart	0	14727	Lilr4b	51481857	515.596800795547	2.06501279902971	0.120645060057518	17.1164306109609	1.11931597243362e-65	1.28690142778176e-63	gained-open
Peak_17138	chr13	23763506	23764108	603	23761885	23762386	upstream	1119	360198	Hist1h3a	23764108	638.165950009924	-1.67508309970829	0.0978788686609366	-17.1138379777454	1.17027819068101e-65	1.34329165870755e-63	gained-close
Peak_17138	chr13	23763506	23764108	603	23763668	23764412	overlapStart	0	80838	Hist1h1a	23764108	638.165950009924	-1.67508309970829	0.0978788686609366	-17.1138379777454	1.17027819068101e-65	1.34329165870755e-63	gained-close
Peak_6834	chr10	79881790	79882302	513	79886312	79888216	upstream	4009	50701	Elane	79882302	338.219039991881	-2.4084192115074	0.141424173236788	-17.0297563449422	4.94095199965201e-65	5.60718101280897e-63	gained-close
Peak_64973	chr9	15357259	15358252	994	15316914	15357788	overlapStart	0	319675	Cep295	15358252	893.617650941697	-1.50837170273988	0.0886216275883265	-17.0203565854907	5.80162370949696e-65	6.55209783604107e-63	gained-close
Peak_23104	chr15	33082912	33083854	943	33083129	33594552	overlapStart	0	54381	Cpq	33083854	560.86871261403	-1.79225948460472	0.105469309938034	-16.9931848957551	9.22417138627158e-65	1.0334166323217e-62	gained-close
Peak_54145	chr6	47654520	47655503	984	47654921	47655094	includeFeature	0	19799	Rn4.5s	47655503	1424.4079465224	-1.51996518503032	0.089450019003051	-16.9923405491784	9.35793357815916e-65	1.04673039176561e-62	gained-close
Peak_38947	chr2	119350615	119351671	1057	119351242	119354326	overlapStart	0	69065	Chac1	119351671	1136.53741478633	-1.55558701698456	0.0916745629632812	-16.9685784878803	1.40286974449199e-64	1.55430432528368e-62	gained-close
Peak_29563	chr17	34893969	34894655	687	34898492	34914051	upstream	3836	110147	Ehmt2	34894655	947.419191340665	-1.60878252744697	0.0949727797434283	-16.9394065519946	2.30437530624494e-64	2.52519927113869e-62	gained-close
Peak_29563	chr17	34893969	34894655	687	34894559	34896844	overlapStart	0	193736	Zbtb12	34894655	947.419191340665	-1.60878252744697	0.0949727797434283	-16.9394065519946	2.30437530624494e-64	2.52519927113869e-62	gained-close
Peak_17033	chr13	21734075	21735942	1868	21735034	21735456	includeFeature	0	319159	Hist1h4j	21735942	1987.1281759438	-1.5596646732098	0.092399089744059	-16.8796540910738	6.35158911971192e-64	6.83214723516497e-62	gained-close
Peak_45936	chr4	52916445	52917531	1087	52910833	52911792	upstream	4652	258836	Olfr272	52917531	275.216933144037	-2.61840665819023	0.155199095772455	-16.8712752168943	7.31989158191538e-64	7.84963235954849e-62	gained-close
Peak_64377	chr8	122699117	122699551	435	122625136	122699109	upstream	7	12398	Cbfa2t3	122699551	294.604937635487	-2.54327661664389	0.151184747262511	-16.8223095430907	1.67499698248642e-63	1.77719460473101e-61	gained-close
Peak_65986	chr9	53705725	53706680	956	53684110	53706232	overlapStart	0	270160	Rab39	53706680	333.362382434713	-2.43721324473928	0.145194175970664	-16.7858884727698	3.09561607787206e-63	3.2500724908593e-61	gained-close
Peak_13402	chr11	120627824	120628260	437	120618372	120625002	upstream	2821	209011	Sirt7	120628260	555.900339354947	-1.80843471418526	0.107973553562518	-16.748867241256	5.77147925774407e-63	6.02338027951436e-61	gained-close
Peak_48015	chr4	134772729	134773650	922	134745412	134768004	upstream	4724	100017	Ldlrap1	134773650	743.214905856782	-1.6314682602178	0.0975480044794532	-16.7247732941727	8.65047262452009e-63	8.98790513445137e-61	gained-close
Peak_11636	chr11	87793349	87794168	820	87793784	87804412	overlapStart	0	17523	Mpo	87794168	135.704096714066	-5.95219024107842	0.356378452561323	-16.7018802576293	1.2699884135916e-62	1.31175401193549e-60	gained-close
Peak_65680	chr9	44881235	44882816	1582	44803355	44881274	overlapStart	0	214162	Kmt2a	44882816	1393.45105519684	-1.71772695877109	0.102946408004843	-16.6856424819628	1.66702926010861e-62	1.71176812736745e-60	gained-close
Peak_54253	chr6	49367271	49368072	802	49367739	49389905	overlapStart	0	231946	Fam221a	49368072	708.304308787992	-1.61231283566038	0.0967622478628332	-16.6626227818306	2.45039073606925e-62	2.4978670565806e-60	gained-close
Peak_50985	chr5	97111237	97111903	667	97082329	97111596	overlapStart	0	231474	Paqr3	97111903	758.458666860855	-1.54827474728207	0.0931377727174794	-16.6234890754641	4.71093609654395e-62	4.76756250012867e-60	gained-close
Peak_33767	chr19	10688405	10689452	1048	10688735	10714419	overlapStart	0	107305	Vps37c	10689452	1238.46584377816	-1.73032775171998	0.104319684325378	-16.5867809408146	8.68524028044045e-62	8.70174223697329e-60	gained-close
Peak_6406	chr10	67003536	67005032	1497	67005075	67041326	upstream	42	102634101	Gm31763	67005032	1013.15066360733	-1.5544587993661	0.0938829193892047	-16.5574186388674	1.41537439754499e-61	1.40800642018472e-59	gained-close
Peak_47592	chr4	129263175	129264178	1004	129219578	129261404	upstream	1770	97130	C77080	129264178	493.347916517899	-1.97541173368773	0.120590133126262	-16.3812053480313	2.60528681892064e-60	2.51675730676806e-58	gained-close
Peak_39577	chr2	130630878	130631532	655	130589996	130630038	upstream	839	140629	Ubox5	130631532	417.346615835713	-1.86368453852533	0.113782283089159	-16.3793913070365	2.68415841629121e-60	2.58938214868984e-58	gained-close
Peak_39577	chr2	130630878	130631532	655	130599514	130630038	upstream	839	380601	Fastkd5	130631532	417.346615835713	-1.86368453852533	0.113782283089159	-16.3793913070365	2.68415841629121e-60	2.58938214868984e-58	gained-close
Peak_29939	chr17	46031770	46033362	1593	46016993	46032377	overlapStart	0	22339	Vegfa	46033362	1084.82755562809	-1.7773249849532	0.109054700898523	-16.2975549912977	1.02719786135805e-59	9.68285854981503e-58	gained-close
Peak_18629	chr13	63567582	63568322	741	63508336	63565520	upstream	2061	19206	Ptch1	63568322	897.012288234386	-1.50779423704164	0.0925463958715723	-16.2923063922881	1.11927353731772e-59	1.05225215807914e-57	gained-close
Peak_57588	chr7	24610567	24611789	1223	24611328	24629297	overlapStart	0	232970	Phldb3	24611789	572.736626127822	-1.59639970015634	0.0980686770962244	-16.2783851829669	1.40528489912549e-59	1.31234148908613e-57	gained-close
Peak_41294	chr2	168154298	168154890	593	168145120	168154513	overlapStart	0	77017	E130018N17Rik	168154890	269.595187374194	-2.30851831751391	0.14185413629043	-16.2738879378708	1.51242162914248e-59	1.40864098428486e-57	gained-close
Peak_57507	chr7	19693286	19694255	970	19689480	19692659	upstream	626	11812	Apoc1	19694255	233.796194839662	-2.5872128990858	0.159043745152764	-16.2673036691933	1.6841209567419e-59	1.56440337826728e-57	gained-close
Peak_31559	chr18	21299751	21300765	1015	21127342	21300139	overlapStart	0	381126	Garem1	21300765	246.191537353113	-2.32759515439964	0.143173266916714	-16.2571910561602	1.98638178371266e-59	1.84273695287196e-57	gained-close
Peak_33639	chr19	8756582	8757586	1005	8754789	8756969	overlapStart	0	102640359	1700023D09Rik	8757586	1197.63099833815	-1.53063812586318	0.0944302431716429	-16.2091939452172	4.3422638145827e-59	3.98607314277655e-57	gained-close
Peak_33639	chr19	8756582	8757586	1005	8757103	8770910	overlapStart	0	53319	Nxf1	8757586	1197.63099833815	-1.53063812586318	0.0944302431716429	-16.2091939452172	4.3422638145827e-59	3.98607314277655e-57	gained-close
Peak_6928	chr10	80621941	80623127	1187	80622780	80640771	overlapStart	0	103236	Csnk1g2	80623127	3303.01551350897	-1.50497326548324	0.0936108741518921	-16.0769064397507	3.70420108953302e-58	3.29260754134625e-56	gained-close
Peak_16012	chr12	108275285	108275828	544	108206345	108275417	overlapStart	0	668158	Ccdc85c	108275828	228.808029121297	-2.31609367582318	0.144242362634817	-16.0569588123491	5.1099871326907e-58	4.52498393405299e-56	gained-close
Peak_46057	chr4	56864582	56865599	1018	56810935	56865211	overlapStart	0	54366	Ctnnal1	56865599	545.488537226016	-2.07340655968621	0.129129134858726	-16.0568454358083	5.11933408642858e-58	4.52754423056111e-56	gained-close
Peak_52706	chr5	138279809	138280547	739	138280509	138312393	overlapStart	0	50878	Stag3	138280547	749.285656395392	-1.53124582049534	0.0954549000422096	-16.0415632913369	6.54849715194823e-58	5.76967023564806e-56	gained-close
Peak_52706	chr5	138279809	138280547	739	138273660	138279937	overlapStart	0	71951	Gpc2	138280547	749.285656395392	-1.53124582049534	0.0954549000422096	-16.0415632913369	6.54849715194823e-58	5.76967023564806e-56	gained-close
Peak_33846	chr19	11628204	11629326	1123	11615520	11623719	upstream	4484	14126	Ms4a2	11629326	111.299625151126	-5.46492765923836	0.341472025584591	-16.0040274159576	1.19770220108839e-57	1.04475682175289e-55	gained-close
Peak_25959	chr16	13446628	13448240	1613	13449523	13449601	upstream	1282	100124432	Mir193b	13448240	540.540457310413	-3.77558181576461	0.237522062527469	-15.8957099630607	6.78553277841715e-57	5.79646492507589e-55	gained-close
Peak_57922	chr7	30238052	30238787	736	30233297	30236765	upstream	1286	381867	Ovol3	30238787	110.770235073045	-4.42966772415501	0.279693719068724	-15.8375659593078	1.71325243922372e-56	1.44071382877791e-54	gained-close
Peak_54089	chr6	42264601	42266193	1593	42264985	42282508	overlapStart	0	12366	Casp2	42266193	1019.51723960362	-1.50772826211591	0.0953016282592232	-15.8205928865648	2.24369838788602e-56	1.87553395754005e-54	gained-close
Peak_1435	chr1	75212683	75213671	989	75198235	75210778	upstream	1904	74577	Glb1l	75213671	696.598293488637	-1.64970795050772	0.104281288248528	-15.8197887484479	2.27253879944639e-56	1.89738051930445e-54	gained-close
Peak_53155	chr5	147400110	147400685	576	147330741	147400489	overlapStart	0	14255	Flt3	147400685	197.857872782766	-2.43737242750333	0.154929644949805	-15.732124270297	9.11026396625571e-56	7.45542756995813e-54	gained-close
Peak_11148	chr11	79023015	79023872	858	79023597	79035005	overlapStart	0	790910	Gm11201	79023872	258.334701525092	-2.39177654851328	0.152056670221796	-15.7295075909826	9.49465691043037e-56	7.76094141141274e-54	gained-close
Peak_68034	chr9	114367929	114368689	761	114341111	114364627	upstream	3301	75100	4930525D18Rik	114368689	258.640198349908	-2.17341325311851	0.138680297445239	-15.6721127164926	2.34648065329296e-55	1.88290306244159e-53	gained-close
Peak_68034	chr9	114367929	114368689	761	114368324	114377238	overlapStart	0	75116	4930520O04Rik	114368689	258.640198349908	-2.17341325311851	0.138680297445239	-15.6721127164926	2.34648065329296e-55	1.88290306244159e-53	gained-close
Peak_17088	chr13	23426954	23427193	240	23418361	23423866	upstream	3087	30946	Abt1	23427193	233.437594697991	-2.38688372225235	0.152587438102789	-15.6427275530011	3.72428248256253e-55	2.97150288224753e-53	gained-close
Peak_25645	chr16	4559723	4560839	1117	4544661	4559720	upstream	2	83383	Tfap4	4560839	579.40625194433	-1.76817095039178	0.113366914145003	-15.596887008234	7.64311986603662e-55	6.00936015207114e-53	gained-close
Peak_29973	chr17	46557576	46558419	844	46546839	46556162	upstream	1413	20807	Srf	46558419	580.313044522464	-1.67388071572371	0.107326516244819	-15.5961525100235	7.73154110401069e-55	6.07207359739733e-53	gained-close
Peak_53337	chr6	4003392	4004332	941	4003987	4008445	overlapStart	0	66066	Gng11	4004332	396.479969756281	-1.79242669206246	0.115168339409488	-15.5635368301124	1.28781488322033e-54	9.97992499501559e-53	gained-close
Peak_64703	chr8	126845539	126846235	697	126849020	126851833	upstream	2784	414091	A630001O12Rik	126846235	295.34333305276	2.29595640682224	0.147707471539648	15.5439422453721	1.74886245965212e-54	1.35080364408351e-52	gained-open
Peak_39995	chr2	145675076	145676021	946	145675525	145753672	overlapStart	0	408057	BC039771	145676021	284.153656390303	-2.16359015879105	0.139327995577179	-15.528753929375	2.2164485869492e-54	1.69331360292492e-52	gained-close
Peak_55259	chr6	89285764	89287181	1418	89269511	89285725	upstream	38	75131	4930512J16Rik	89287181	211.830472446937	3.01583938322524	0.195220003214769	15.4484137565933	7.73230015352878e-54	5.7324461592752e-52	gained-open
Peak_13349	chr11	120189266	120190547	1282	120186650	120189856	overlapStart	0	100042332	2810410L24Rik	120190547	840.565549835694	-1.59724821948281	0.1037090686944	-15.4012396369061	1.6056153042015e-53	1.17789349507912e-51	gained-close
Peak_24352	chr15	78119791	78120122	332	77993623	78119280	upstream	510	12300	Cacng2	78120122	155.233859437921	-2.86775334169065	0.186500194336651	-15.3766774983306	2.34685390771358e-53	1.7127149335034e-51	gained-close
Peak_20801	chr14	44861010	44861519	510	44851235	44859375	upstream	1634	19214	Ptgdr	44861519	92.7717372220591	-4.51194387460365	0.293620239078504	-15.3665969647184	2.7419801048127e-53	1.99691890644682e-51	gained-close
Peak_21617	chr14	65357884	65358933	1050	65358676	65398930	overlapStart	0	380912	Zfp395	65358933	549.248793496502	-1.7298795508374	0.112888116644622	-15.3238410051888	5.29913173539928e-53	3.81564687883735e-51	gained-close
Peak_33595	chr19	7267013	7269089	2077	7267394	7275225	overlapStart	0	104383	Rcor2	7269089	827.912249014694	-1.89292407278743	0.123600210154964	-15.3148936430946	6.08112730723989e-53	4.36975103933049e-51	gained-close
Peak_30245	chr17	56006988	56007486	499	55997076	56005606	upstream	1381	106766	Stap2	56007486	489.8374726755	-1.93833142598215	0.127012502896715	-15.2609497630196	1.39207268640542e-52	9.79240057328697e-51	gained-close
Peak_30245	chr17	56006988	56007486	499	56009201	56016790	upstream	1714	68047	Mpnd	56007486	489.8374726755	-1.93833142598215	0.127012502896715	-15.2609497630196	1.39207268640542e-52	9.79240057328697e-51	gained-close
Peak_23131	chr15	34356232	34358423	2192	34349051	34357872	overlapStart	0	77358	9430069I07Rik	34358423	609.063886708556	-1.68289944950358	0.110437192789319	-15.2385207102651	1.96263761784352e-52	1.37233962165722e-50	gained-close
Peak_62796	chr8	71670727	71671867	1141	71676383	71690577	upstream	4515	16453	Jak3	71671867	695.83280060164	-1.53068208481924	0.100571846207742	-15.2197870729892	2.61380357199169e-52	1.81140203472819e-50	gained-close
Peak_62796	chr8	71670727	71671867	1141	71626712	71671757	overlapStart	0	382018	Unc13a	71671867	695.83280060164	-1.53068208481924	0.100571846207742	-15.2197870729892	2.61380357199169e-52	1.81140203472819e-50	gained-close
Peak_22106	chr14	76673716	76674464	749	76677568	76687108	upstream	3103	73272	1700108F19Rik	76674464	223.617487224168	-2.20727555926366	0.145434941702204	-15.1770649709705	5.01735200127598e-52	3.44982301868126e-50	gained-close
Peak_1203	chr1	64529866	64530179	314	64532804	64604548	upstream	2624	12912	Creb1	64530179	163.386388387178	-2.9926948586535	0.197405177731836	-15.1601639482776	6.49071134449974e-52	4.43677445149903e-50	gained-close
Peak_47662	chr4	130174694	130176006	1313	130164454	130175122	overlapStart	0	94242	Tinagl1	130176006	148.885421465094	-2.72098478197468	0.179975815568352	-15.118613428043	1.22086253409014e-51	8.18573155863704e-50	gained-close
Peak_13765	chr12	12942318	12943004	687	12936093	12941836	upstream	481	18109	Mycn	12943004	192.196144335995	-2.36486365951719	0.156468484158444	-15.1139935446838	1.30956650115404e-51	8.76372399097677e-50	gained-close
Peak_13248	chr11	119087376	119087780	405	119077571	119086237	upstream	1138	12418	Cbx4	119087780	252.621578153736	-2.25388243222175	0.149386233964034	-15.087617998084	1.95368984383946e-51	1.29998225633769e-49	gained-close
Peak_26819	chr16	33793740	33794436	697	33794037	33819927	overlapStart	0	17063	Muc13	33794436	104.651272838355	-5.5038331709431	0.365856007771954	-15.0437140678957	3.79639071918665e-51	2.49533524188114e-49	gained-close
Peak_43729	chr3	98338473	98340111	1639	98313171	98339969	overlapStart	0	236539	Phgdh	98340111	400.251502437325	-1.88532863519908	0.1253853902274	-15.0362704281562	4.24819305701276e-51	2.78447218380819e-49	gained-close
Peak_48124	chr4	135942078	135942564	487	135946453	135962617	upstream	3888	15356	Hmgcl	135942564	188.610783668611	3.29308617457702	0.219118542898513	15.0287882121517	4.75627017865272e-51	3.10877443093617e-49	gained-open
Peak_49086	chr5	5514065	5515088	1024	5505015	5514976	overlapStart	0	64945	Cldn12	5515088	434.659304276603	-1.61041965707824	0.107837035713616	-14.9338271997299	1.98536390935632e-50	1.26581388231715e-48	gained-close
Peak_12900	chr11	115190339	115190817	479	115182832	115187316	upstream	3022	66176	Nat9	115190817	380.656506345589	2.02125555966398	0.13538317938681	14.9298869240539	2.10622959723984e-50	1.34043738968441e-48	gained-open
Peak_16040	chr12	108832190	108832608	419	108836973	108837068	upstream	4364	723946	Mir345	108832608	329.809887350521	-2.02371574903403	0.135702583020289	-14.9128756726131	2.71790357326872e-50	1.72346050003666e-48	gained-close
Peak_17062	chr13	21944725	21945620	896	21945094	21960485	overlapStart	0	193452	Zfp184	21945620	295.461239884957	-1.91497826371356	0.128436643602248	-14.9099058493307	2.84152944944483e-50	1.79697912423728e-48	gained-close
Peak_5984	chr10	51490498	51492311	1814	51490898	51496613	overlapStart	0	14728	Lilrb4a	51492311	614.489225973798	1.68421978207568	0.113032950263486	14.9002549977654	3.28324069011458e-50	2.07257893177143e-48	gained-open
Peak_34226	chr19	24555520	24556751	1232	24294796	24555827	overlapStart	0	18719	Pip5k1b	24556751	400.195254308746	-1.66924179176669	0.112081406729671	-14.8931195679291	3.65318718662017e-50	2.29990104990334e-48	gained-close
Peak_58683	chr7	66108915	66109699	785	66109515	66173798	overlapStart	0	269941	Chsy1	66109699	691.870640015389	-1.59155364446628	0.107006838620987	-14.8733825330873	4.90701417184234e-50	3.07820773625956e-48	gained-close
Peak_58205	chr7	43944567	43945436	870	43945012	43945927	overlapStart	0	16604	Klk1b7-ps	43945436	182.421309938191	3.49981070885165	0.23539019919665	14.8681241648801	5.30798355588745e-50	3.32676327725696e-48	gained-open
Peak_40826	chr2	163471784	163472937	1154	163468703	163472629	overlapStart	0	228859	Fitm2	163472937	912.138357968486	-1.56596827773455	0.105341405705325	-14.8656481964469	5.50791984259361e-50	3.44591384764155e-48	gained-close
Peak_40826	chr2	163471784	163472937	1154	163472545	163473003	overlapStart	0	69517	2310001K24Rik	163472937	912.138357968486	-1.56596827773455	0.105341405705325	-14.8656481964469	5.50791984259361e-50	3.44591384764155e-48	gained-close
Peak_36553	chr2	30061812	30061999	188	30061996	30072577	overlapStart	0	56086	Set	30061999	112.362567478027	-3.3296128844268	0.22419948800384	-14.8511172530857	6.84188065287391e-50	4.26147083328602e-48	gained-close
Peak_65932	chr9	51076385	51077512	1128	51056780	51077094	overlapStart	0	244864	Layn	51077512	333.337995470102	-1.76505517475584	0.119025397376719	-14.8292315224908	9.48121398657991e-50	5.87408110000714e-48	gained-close
Peak_41430	chr2	173223699	173224421	723	173206612	173218922	upstream	4776	58203	Zbp1	173224421	154.567036014011	-2.86932743465542	0.193569118376512	-14.8232706679703	1.03614062022371e-49	6.40243613375769e-48	gained-close
Peak_25132	chr15	97767506	97768492	987	97744770	97767666	overlapStart	0	223864	Rapgef3	97768492	271.507742602766	-2.16622431051959	0.146328100784861	-14.8038845505449	1.3826163797997e-49	8.52832318069411e-48	gained-close
Peak_18172	chr13	51408558	51409071	514	51408618	51422797	overlapStart	0	13610	S1pr3	51409071	180.2096998335	-2.50157099962454	0.169619516273748	-14.7481319047466	3.16299251503444e-49	1.93063667586519e-47	gained-close
Peak_48051	chr4	135120070	135120821	752	135120645	135177990	overlapStart	0	12399	Runx3	135120821	662.907445790294	-1.75690966278815	0.119483006022128	-14.7042639893306	6.05254127147627e-49	3.66565524173096e-47	gained-close
Peak_30252	chr17	56036257	56037084	828	56016750	56036637	overlapStart	0	20405	Sh3gl1	56037084	1196.98686326183	-1.55262990959278	0.10562523717047	-14.6994217592805	6.50124902911688e-49	3.93062153585391e-47	gained-close
Peak_30252	chr17	56036257	56037084	828	56040416	56070276	upstream	3331	27221	Chaf1a	56037084	1196.98686326183	-1.55262990959278	0.10562523717047	-14.6994217592805	6.50124902911688e-49	3.93062153585391e-47	gained-close
Peak_62256	chr8	40423290	40424604	1315	40423815	40484842	overlapStart	0	70546	Zdhhc2	40424604	373.596443307337	-1.67778718770427	0.114751332462515	-14.6210693305226	2.06137042327646e-48	1.22103118155108e-46	gained-close
Peak_24793	chr15	84190014	84190997	984	84192233	84214303	upstream	1235	68653	Samm50	84190997	286.428840444744	-1.88037816295978	0.129631664912533	-14.5055466519584	1.11743698815168e-47	6.43425355419063e-46	gained-close
Peak_57246	chr7	7277687	7278545	859	7212996	7278289	overlapStart	0	76229	Vmn2r29	7278545	596.644823460886	-1.73965918838585	0.119981155682553	-14.4994368364699	1.22147920595625e-47	7.01605251034642e-46	gained-close
Peak_62737	chr8	70905612	70906650	1039	70905974	70917529	overlapStart	0	270058	Map1s	70906650	419.666352348263	-1.8155768648078	0.125817214869987	-14.4302738435589	3.33753358085046e-47	1.88160162882464e-45	gained-close
Peak_24446	chr15	79040571	79041197	627	79041885	79043558	upstream	687	14429	Galr3	79041197	252.840923923884	-1.94936117910554	0.135191211389298	-14.4192892353937	3.91351919192514e-47	2.20278363954483e-45	gained-close
Peak_41578	chr2	180104038	180104965	928	180099465	180104407	overlapStart	0	99296	Hrh3	180104965	303.488040848218	-1.89922986537956	0.131717469821835	-14.4189671115647	3.93182578048725e-47	2.21131305102576e-45	gained-close
Peak_8467	chr11	3330135	3330828	694	3330731	3342971	overlapStart	0	216505	Pik3ip1	3330828	338.430810657021	-1.87863889974613	0.130510128756455	-14.3945831457408	5.5961273328749e-47	3.12478661016334e-45	gained-close
Peak_40701	chr2	158305935	158307139	1205	158306493	158332852	overlapStart	0	16803	Lbp	158307139	1124.54082896733	-3.06692540693305	0.21310087739129	-14.3918947893473	5.81798501690227e-47	3.24608387581867e-45	gained-close
Peak_47349	chr4	123112079	123112861	783	123116248	123118000	upstream	3386	353371	Oxct2b	123112861	125.447714061434	-2.81497330189434	0.195620954832194	-14.3899374395195	5.98500259108032e-47	3.32867713497412e-45	gained-close
Peak_26751	chr16	32643583	32644118	536	32644643	32683493	upstream	524	51789	Tnk2	32644118	281.4103580498	-1.81798372118072	0.126535120883258	-14.367423909588	8.28562921933261e-47	4.57195935514913e-45	gained-close
Peak_38249	chr2	91645911	91646269	359	91650118	91672325	upstream	3848	228359	Arhgap1	91646269	183.866348062776	-2.31090941787412	0.161469142309011	-14.3117711832	1.8474741736935e-46	1.00518934230912e-44	gained-close
Peak_18728	chr13	67811678	67812095	418	67813816	67827000	upstream	1720	212569	Zfp273	67812095	146.937569070171	-2.686924415391	0.187802019272509	-14.307217919165	1.97247572248531e-46	1.07153865100745e-44	gained-close
Peak_29906	chr17	45736757	45737499	743	45732864	45733844	upstream	2912	72240	1600014C23Rik	45737499	390.212041462136	-1.82508008642212	0.127917564717163	-14.2676268928159	3.48228162062223e-46	1.87143951646819e-44	gained-close
Peak_8457	chr11	3199120	3199551	432	3202353	3244588	upstream	2801	74203	Eif4enif1	3199551	185.872485246708	-2.51313266332744	0.176257447253181	-14.2583062587846	3.9799721488955e-46	2.13237117432e-44	gained-close
Peak_60059	chr7	110619184	110619862	679	110308013	110614920	upstream	4263	319934	Sbf2	110619862	186.317301157091	-2.24292266812884	0.1576745206882	-14.22501656158	6.40891765790812e-46	3.39997444857844e-44	gained-close
Peak_7255	chr10	85386510	85387444	935	85386814	85660292	overlapStart	0	74007	Btbd11	85387444	324.52817533946	-1.72548038547406	0.121366510644531	-14.2171046717145	7.17610566543043e-46	3.79835334817836e-44	gained-close
Peak_6998	chr10	81168864	81169600	737	81153961	81167720	upstream	1143	59004	Pias4	81169600	435.208757931566	-1.5373710545073	0.108593892649704	-14.1570673727156	1.68896661696369e-45	8.79378587583627e-44	gained-close
Peak_29905	chr17	45734930	45736037	1108	45732864	45733844	upstream	1085	72240	1600014C23Rik	45736037	412.889580924001	-1.84614654680909	0.130496592211661	-14.1470862611853	1.94656977135687e-45	1.01199983524515e-43	gained-close
Peak_32392	chr18	60803129	60804070	942	60803849	60812652	overlapStart	0	16149	Cd74	60804070	287.408542589801	2.0445936635614	0.1455091835171	14.0513032520804	7.56293145824532e-45	3.8324499419156e-43	gained-open
Peak_53408	chr6	7692580	7693494	915	7675171	7693182	overlapStart	0	27053	Asns	7693494	467.614804423457	-1.52930809058029	0.108840778904232	-14.0508741849957	7.60889508004753e-45	3.85295767977598e-43	gained-close
Peak_66944	chr9	72662264	72662625	362	72662347	72749848	overlapStart	0	17999	Nedd4	72662625	136.875715744418	-2.78990105083107	0.198693481508771	-14.041230893163	8.71850615240422e-45	4.40212377240148e-43	gained-close
Peak_42312	chr3	37728035	37729715	1681	37714190	37724360	upstream	3674	381438	Gm5148	37729715	518.806365153583	-1.52731700957801	0.108789251175668	-14.0392271577619	8.96853298375714e-45	4.52185567037987e-43	gained-close
Peak_56469	chr6	127789748	127790877	1130	127788084	127788143	upstream	1604	102466996	Mir7233	127790877	330.451130945547	-1.72410358064764	0.122861462938707	-14.0329077923137	9.80474958924228e-45	4.929293927902e-43	gained-close
Peak_64575	chr8	124792170	124793650	1481	124793019	124834704	overlapStart	0	330863	Trim67	124793650	431.509101651048	-1.58236792066948	0.112902580034401	-14.0153388893977	1.25597306749731e-44	6.26049460858484e-43	gained-close
Peak_34210	chr19	24224624	24225672	1049	24094502	24225026	overlapStart	0	21873	Tjp2	24225672	186.889421674253	-2.1951660446948	0.157115069041603	-13.9717091306725	2.31991720250939e-44	1.13778149065448e-42	gained-close
Peak_22223	chr14	79199957	79200720	764	79178893	79199190	upstream	766	100043765	Gm4632	79200720	93.2120665791002	-4.40639335236258	0.315498909502068	-13.9664297392245	2.49840827386187e-44	1.22275553015181e-42	gained-close
Peak_68770	chrX	20658062	20659133	1072	20658302	20683179	overlapStart	0	22201	Uba1	20659133	386.772595897683	-1.57556748564807	0.113041802091335	-13.9379190396758	3.7264762256181e-44	1.80864330194653e-42	gained-close
Peak_33780	chr19	10831386	10832426	1041	10789339	10830058	upstream	1327	12511	Cd6	10832426	290.281590669447	2.45115523743376	0.175997303655646	13.9272317616277	4.32807879389783e-44	2.09050378823992e-42	gained-open
Peak_58408	chr7	46391641	46392012	372	46396468	46438704	upstream	4455	16502	Kcnc1	46392012	83.0783674860461	-3.72476971682036	0.267588250772994	-13.9197805062833	4.80377044673397e-44	2.30913524839475e-42	gained-close
Peak_37062	chr2	38508980	38509661	682	38511697	38587490	upstream	2035	59126	Nek6	38509661	221.490492019455	2.4688944348368	0.177694370846163	13.8940497837954	6.88308978661125e-44	3.28388936057419e-42	gained-open
Peak_48659	chr4	148159668	148160393	726	148152799	148160094	overlapStart	0	230903	Fbxo44	148160393	508.96483044187	-1.5153418507481	0.109267960239988	-13.8681260949679	9.88249793690564e-44	4.6641267012719e-42	gained-close
Peak_48659	chr4	148159668	148160393	726	148160668	148166417	upstream	274	230904	Fbxo2	148160393	508.96483044187	-1.5153418507481	0.109267960239988	-13.8681260949679	9.88249793690564e-44	4.6641267012719e-42	gained-close
Peak_11686	chr11	88718170	88719119	950	88718643	88728572	overlapStart	0	193280	C030037D09Rik	88719119	536.783516002019	-1.53502684542116	0.110728287545904	-13.86300537507	1.06135613082325e-43	4.99906578395077e-42	gained-close
Peak_11686	chr11	88718170	88719119	950	88339382	88718267	overlapStart	0	76626	Msi2	88719119	536.783516002019	-1.53502684542116	0.110728287545904	-13.86300537507	1.06135613082325e-43	4.99906578395077e-42	gained-close
Peak_24805	chr15	84321614	84321884	271	84324720	84342978	upstream	2835	64099	Parvg	84321884	202.178157570143	-2.45276787635491	0.178293098180404	-13.7569423684202	4.62685102420204e-43	2.1016511844583e-41	gained-close
Peak_52194	chr5	124226207	124227313	1107	124229725	124237137	upstream	2411	75927	Pitpnm2os1	124227313	437.382692738162	-1.60144958551747	0.116690770952796	-13.723875268296	7.30539928499007e-43	3.27798827929756e-41	gained-close
Peak_28786	chr17	25247769	25248635	867	25245551	25245638	upstream	2130	102465583	Mir3547	25248635	198.689986607707	-2.35731974578133	0.171868712723943	-13.7158166161847	8.16419768545936e-43	3.65165609868827e-41	gained-close
Peak_44984	chr3	157924716	157925417	702	157894248	157925063	overlapStart	0	107869	Cth	157925417	440.977107515926	-1.520635002822	0.11128904784483	-13.6638333445194	1.66958150376097e-42	7.34584439167305e-41	gained-close
Peak_37969	chr2	78868206	78869362	1157	78869047	78920583	overlapStart	0	22193	Ube2e3	78869362	471.666648992252	-1.55225111769838	0.113705980432834	-13.6514465799386	1.97910444838847e-42	8.70222772908016e-41	gained-close
Peak_26205	chr16	19884024	19884458	435	19876567	19884274	overlapStart	0	68162	A930003A15Rik	19884458	73.1592870396584	-4.07179538429282	0.299750800492538	-13.5839349806647	4.9873369695144e-42	2.14324083139064e-40	gained-close
Peak_10736	chr11	72549797	72550819	1023	72498156	72550246	overlapStart	0	77577	Spns3	72550819	423.642395681187	-1.64660706851164	0.121232853565796	-13.5821851922176	5.10794431616451e-42	2.19372601791528e-40	gained-close
Peak_63630	chr8	105413445	105413906	462	105413622	105464086	overlapStart	0	270091	Lrrc36	105413906	129.761800042655	-2.62078002330735	0.193180684652199	-13.5664703126287	6.32975427642779e-42	2.70850919260958e-40	gained-close
Peak_63630	chr8	105413445	105413906	462	105382807	105413502	overlapStart	0	279499	Kctd19	105413906	129.761800042655	-2.62078002330735	0.193180684652199	-13.5664703126287	6.32975427642779e-42	2.70850919260958e-40	gained-close
Peak_69644	chrX	153139723	153140422	700	153139958	153171943	overlapStart	0	245670	Rragb	153140422	219.270585220296	-2.03165976014685	0.149867101569385	-13.5564092377288	7.26042312912725e-42	3.09729474035937e-40	gained-close
Peak_1867	chr1	88226878	88227747	870	88227020	88262289	overlapStart	0	100040766	Mroh2a	88227747	295.828060152615	-1.78139494193654	0.132143603287994	-13.48075046852	2.03031135177633e-41	8.52135404153976e-40	gained-close
Peak_58677	chr7	65802331	65803694	1364	65804052	65806223	upstream	357	100503969	1810008I18Rik	65803694	158.379632873288	-2.22448726691822	0.165291784781479	-13.4579420862269	2.76510425069968e-41	1.15362912798525e-39	gained-close
Peak_38328	chr2	93029180	93029598	419	93029348	93033445	overlapStart	0	433456	4631405J19Rik	93029598	116.582862220117	-2.67475081169803	0.199672410046953	-13.3956955348466	6.40729662707876e-41	2.62325122210692e-39	gained-close
Peak_39470	chr2	129311495	129311964	470	129299610	129309972	upstream	1522	16175	Il1a	129311964	171.139877549992	2.70515529201112	0.202099810099579	13.3852441062574	7.37546549202338e-41	3.01084703930196e-39	gained-open
Peak_7241	chr10	85102084	85103324	1241	85102627	85120618	overlapStart	0	103266	Tmem263	85103324	393.229704221944	-1.52374782167156	0.114031220901696	-13.3625493932504	1.00076944515891e-40	4.04535812664727e-39	gained-close
Peak_7241	chr10	85102084	85103324	1241	85097019	85102495	overlapStart	0	14202	Fhl4	85103324	393.229704221944	-1.52374782167156	0.114031220901696	-13.3625493932504	1.00076944515891e-40	4.04535812664727e-39	gained-close
Peak_51234	chr5	105138178	105139906	1729	105115767	105139586	overlapStart	0	17472	Gbp4	105139906	312.895703169805	-1.88801366243984	0.141351681329082	-13.3568532378779	1.08035512121466e-40	4.35701815504012e-39	gained-close
Peak_29605	chr17	35188008	35188624	617	35185095	35188440	overlapStart	0	16988	Lst1	35188624	513.383348127001	-1.52557483108396	0.11476290230926	-13.2932750948811	2.53246130055948e-40	1.00799720994403e-38	gained-close
Peak_18438	chr13	56522146	56522880	735	56522508	56537786	overlapStart	0	213311	Fbxl21	56522880	385.333430551375	-1.51133913375025	0.113703073522241	-13.2919813592781	2.57663704535284e-40	1.02267847143028e-38	gained-close
Peak_52310	chr5	127632182	127633173	992	127632262	127707520	overlapStart	0	319804	Glt1d1	127633173	153.540261275852	-2.2519449684493	0.169614822459439	-13.2768170599467	3.15523384173245e-40	1.24949754388606e-38	gained-close
Peak_23370	chr15	41447005	41447906	902	41447482	41861048	overlapStart	0	170719	Oxr1	41447906	128.210060806043	-2.53939148634476	0.191293270250572	-13.2748605479872	3.23873459219814e-40	1.28039556456952e-38	gained-close
Peak_37657	chr2	69718977	69719916	940	69722819	69754059	upstream	2902	228005	Ppig	69719916	236.313826185629	2.11116186540228	0.159054372905242	13.2732085691226	3.31094682343795e-40	1.30820638629957e-38	gained-open
Peak_56395	chr6	125532238	125533740	1503	125532587	125686679	overlapStart	0	22371	Vwf	125533740	217.516609245796	2.30160641812293	0.174026581961413	13.2256026187612	6.24348171066257e-40	2.4245520643073e-38	gained-open
Peak_26143	chr16	18169142	18169741	600	18165089	18165170	upstream	3971	102465189	Mir6366	18169741	68.0101516534139	-4.79970368344922	0.362959614902723	-13.2237953931475	6.39536266085149e-40	2.48078522949943e-38	gained-close
Peak_36114	chr2	24181784	24182656	873	24186476	24193567	upstream	3819	215257	Il1f9	24182656	422.405782308452	-1.54690379927484	0.117099922010467	-13.2101181001347	7.67039904449987e-40	2.96717096628742e-38	gained-close
Peak_24856	chr15	85735110	85735806	697	85735564	85806851	overlapStart	0	19013	Ppara	85735806	123.975524699152	-2.86027557831828	0.217244943134424	-13.1661319110587	1.37461941462162e-39	5.24231557398902e-38	gained-close
Peak_40137	chr2	150566828	150567790	963	150570415	150578944	upstream	2624	13011	Cst7	150567790	228.198198731684	-1.93208431636756	0.146976893543556	-13.1454970219179	1.80614827637905e-39	6.85076241575403e-38	gained-close
Peak_59995	chr7	109174372	109175286	915	109138565	109175207	overlapStart	0	109594	Lmo1	109175286	127.196711480015	-2.67051364020999	0.203664854299015	-13.1122949484904	2.7999555099052e-39	1.05010310040739e-37	gained-close
Peak_56238	chr6	123259834	123260606	773	123262107	123275268	upstream	1500	17474	Clec4d	123260606	321.768982196357	1.97786673285102	0.151003895325311	13.0981172941934	3.37526620649182e-39	1.25846647985056e-37	gained-open
Peak_4671	chr1	193272489	193273672	1184	193272160	193273188	overlapStart	0	14373	G0s2	193273672	280.60602421416	-1.7617958259548	0.134510404533412	-13.0978405132755	3.38759543989006e-39	1.26239230066849e-37	gained-close
Peak_24522	chr15	79932373	79933228	856	79915807	79932646	overlapStart	0	52609	Cbx7	79933228	438.531190139959	-1.53861585044127	0.117657454910988	-13.0770791498532	4.45221720667839e-39	1.63995456594525e-37	gained-close
Peak_12129	chr11	99040986	99041710	725	99041260	99052646	overlapStart	0	16010	Igfbp4	99041710	160.598121155852	-2.16116828735557	0.165398113121816	-13.0664627701276	5.11910708529412e-39	1.87771096868689e-37	gained-close
Peak_48128	chr4	135958295	135959177	883	135963730	135968178	upstream	4552	74246	Gale	135959177	310.597061668734	-1.74154570520717	0.133348126537687	-13.0601437787353	5.56226354767223e-39	2.03600328491073e-37	gained-close
Peak_30319	chr17	56756888	56757875	988	56751325	56757530	overlapStart	0	18188	Nrtn	56757875	276.211753478413	-1.7916661411636	0.137406122918131	-13.0392016244509	7.3219734152209e-39	2.65930585981195e-37	gained-close
Peak_11393	chr11	83592411	83593998	1588	83587886	83593087	overlapStart	0	20305	Ccl6	83593998	599.039491322298	1.75970562127007	0.134989587482957	13.0358619066988	7.64976396343022e-39	2.77548316630756e-37	gained-open
Peak_3920	chr1	171917216	171918056	841	171917537	171953167	overlapStart	0	30925	Slamf6	171918056	219.874416468614	2.29133479095578	0.175842907982976	13.0305783567774	8.19838525451465e-39	2.9668594068879e-37	gained-open
Peak_32978	chr18	80046716	80047371	656	80046895	80119640	overlapStart	0	93737	Pard6g	80047371	124.86760781578	-2.61957674558657	0.201904285056429	-12.9743494292577	1.7104243585968e-38	6.12026487456476e-37	gained-close
Peak_68527	chrX	7638466	7638802	337	7638580	7653256	overlapStart	0	20977	Syp	7638802	162.459267510408	-2.1131564008342	0.163765095036054	-12.9035824170527	4.29649382817787e-38	1.49988054580189e-36	gained-close
Peak_48352	chr4	140665815	140666100	286	140514485	140665905	overlapStart	0	72754	Arhgef10l	140666100	107.607741781036	-2.68635825804196	0.208496352322071	-12.8844376801962	5.50754605375485e-38	1.91407694443999e-36	gained-close
Peak_51761	chr5	115732008	115733076	1069	115649286	115731559	upstream	448	75665	Bicdl1	115733076	785.647236801059	-1.64498530545223	0.127697980597288	-12.8818427492593	5.69591404952751e-38	1.97464923398672e-36	gained-close
Peak_17080	chr13	23308685	23309814	1130	23313525	23385799	upstream	3710	75887	4930586N03Rik	23309814	143.904031421459	-2.23556560040573	0.173639191031635	-12.8747754877436	6.24203223909441e-38	2.15651451736162e-36	gained-close
Peak_53511	chr6	16898089	16898746	658	16833381	16898441	overlapStart	0	21426	Tfec	16898746	328.836888766257	-1.64554503543734	0.12805310594974	-12.8504890469678	8.54682048929669e-38	2.93242605737334e-36	gained-close
Peak_842	chr1	52816706	52817925	1220	52789418	52817688	overlapStart	0	16329	Inpp1	52817925	535.789604348014	-1.53675931439109	0.119696960351537	-12.838749704903	9.94679028040768e-38	3.39298756194471e-36	gained-close
Peak_28730	chr17	24533461	24533978	518	24529054	24533747	overlapStart	0	328778	Rab26	24533978	214.838001128511	-1.84494528605771	0.143860838536968	-12.8245136398508	1.19534294907584e-37	4.06364454908076e-36	gained-close
Peak_42949	chr3	82357753	82358432	680	82358044	82395268	overlapStart	0	213582	Map9	82358432	712.35464141157	-1.50697810257155	0.117904641113323	-12.7813297961963	2.08474285808153e-37	6.95387542857438e-36	gained-close
Peak_68566	chrX	9272135	9273232	1098	9272784	9313245	overlapStart	0	22439	Xk	9273232	179.831189862103	-2.12669481120264	0.166956122734148	-12.7380462385862	3.63381106519163e-37	1.19479639678896e-35	gained-close
Peak_45332	chr4	19922037	19922713	677	19876838	19922566	overlapStart	0	242341	Atp6v0d2	19922713	159.105128887187	2.76806756439497	0.217569057195866	12.7227079074164	4.42263268086681e-37	1.44805087678446e-35	gained-open
Peak_18363	chr13	55398049	55398660	612	55399648	55414695	upstream	987	20505	Slc34a1	55398660	151.27960930488	-2.5567555618413	0.201357581017423	-12.6975877884631	6.0980449129567e-37	1.98180808100274e-35	gained-close
Peak_26579	chr16	30063514	30063728	215	30065357	30067796	upstream	1628	15205	Hes1	30063728	94.1296783167833	-3.11617286420016	0.245938013992175	-12.6705620396662	8.60953078799534e-37	2.773597715914e-35	gained-close
Peak_52929	chr5	142550745	142551381	637	142484839	142551098	overlapStart	0	231858	Radil	142551381	126.280820009149	-2.42855763516682	0.191687931382395	-12.6693298720102	8.74583331222558e-37	2.81492210962055e-35	gained-close
Peak_35778	chr2	10152594	10153966	1373	10153543	10256529	overlapStart	0	209378	Itih5	10153966	195.846617808972	-1.92656713551327	0.152075068746092	-12.668527138593	8.83578331854351e-37	2.84256876825418e-35	gained-close
Peak_56150	chr6	121210405	121210911	507	121210734	121226098	overlapStart	0	53857	Tuba8	121210911	231.633899180896	-2.2407656670195	0.177590824825322	-12.6175756502259	1.68942468030245e-36	5.35886119871785e-35	gained-close
Peak_28759	chr17	24803813	24804827	1015	24804382	24839787	overlapStart	0	75178	Meiob	24804827	166.954891976408	-2.00762218084768	0.159221393839145	-12.6089976506292	1.88373516748993e-36	5.95367275806992e-35	gained-close
Peak_66870	chr9	71164993	71165663	671	71168776	71208122	upstream	3112	102635087	Gm32511	71165663	247.852736357694	-1.9192477864777	0.152814408702586	-12.559337844987	3.53276837318345e-36	1.09581443748994e-34	gained-close
Peak_66870	chr9	71164993	71165663	671	71110659	71163289	upstream	1703	64008	Aqp9	71165663	247.852736357694	-1.9192477864777	0.152814408702586	-12.559337844987	3.53276837318345e-36	1.09581443748994e-34	gained-close
Peak_66048	chr9	55282849	55284078	1230	55220222	55283625	overlapStart	0	83961	Nrg4	55284078	343.720259736007	-1.55322910752641	0.124685156109331	-12.457209470584	1.27763420446444e-35	3.82760869977378e-34	gained-close
Peak_58007	chr7	31059180	31059949	770	31059935	31070935	overlapStart	0	243914	Lgi4	31059949	253.832024301395	1.96119129674936	0.157699158751154	12.4362825539487	1.66053922906468e-35	4.94096723597766e-34	gained-open
Peak_58007	chr7	31059180	31059949	770	31051678	31055656	upstream	3523	56188	Fxyd1	31059949	253.832024301395	1.96119129674936	0.157699158751154	12.4362825539487	1.66053922906468e-35	4.94096723597766e-34	gained-open
Peak_48483	chr4	142014730	142015496	767	141890623	142015082	overlapStart	0	329977	Fhad1	142015496	203.786070938938	-1.83339412085287	0.147512084122695	-12.4287724070654	1.82414063554325e-35	5.41398456168238e-34	gained-close
Peak_48483	chr4	142014730	142015496	767	142017898	142028995	upstream	2401	78917	4930455G09Rik	142015496	203.786070938938	-1.83339412085287	0.147512084122695	-12.4287724070654	1.82414063554325e-35	5.41398456168238e-34	gained-close
Peak_62618	chr8	69821935	69823454	1520	69822565	69831102	overlapStart	0	53978	Lpar2	69823454	347.34517612486	-1.84024636642737	0.14817214047976	-12.4196516326815	2.04449807998404e-35	6.0526291196083e-34	gained-close
Peak_68074	chr9	114843753	114844881	1129	114789345	114844152	overlapStart	0	70031	Cmtm8	114844881	328.603335416879	-1.59127747194084	0.12858320237428	-12.3754692880409	3.54814337682355e-35	1.03900601021614e-33	gained-close
Peak_60660	chr7	127136706	127138135	1430	127132232	127137823	overlapStart	0	20737	Spn	127138135	297.045440488774	-1.75352443193392	0.141864874460148	-12.3605257369506	4.27352586446152e-35	1.24621700395958e-33	gained-close
Peak_22827	chr15	10713896	10715417	1522	10714836	10790123	overlapStart	0	75259	4930556M19Rik	10715417	216.325226900311	-1.74230264264183	0.141801728293721	-12.2868928581245	1.06522177587159e-34	3.03071800434898e-33	gained-close
Peak_22827	chr15	10713896	10715417	1522	10568978	10714631	overlapStart	0	75646	Rai14	10715417	216.325226900311	-1.74230264264183	0.141801728293721	-12.2868928581245	1.06522177587159e-34	3.03071800434898e-33	gained-close
Peak_31566	chr18	23752089	23753093	1005	23750447	23752305	overlapStart	0	100502834	Gm15972	23753093	233.652182808116	-1.67845536573865	0.137489871601722	-12.2078473576641	2.82258546760658e-34	7.81509619422235e-33	gained-close
Peak_31566	chr18	23752089	23753093	1005	23752333	23893861	overlapStart	0	212307	Mapre2	23753093	233.652182808116	-1.67845536573865	0.137489871601722	-12.2078473576641	2.82258546760658e-34	7.81509619422235e-33	gained-close
Peak_34026	chr19	16955630	16956211	582	16956118	17223932	overlapStart	0	353211	Prune2	16956211	65.7173315157539	-3.62521826462096	0.297678789041408	-12.1782888068544	4.05704697968589e-34	1.11015558262314e-32	gained-close
Peak_16739	chr13	12340505	12340975	471	12269426	12340732	overlapStart	0	11472	Actn2	12340975	94.5407944643832	-2.77069040916087	0.227733712503791	-12.1663603455933	4.695570556229e-34	1.28137918217902e-32	gained-close
Peak_16197	chr12	111943892	111944684	793	111941991	111944482	overlapStart	0	77675	5033406O09Rik	111944684	412.764606993508	-1.54477237196685	0.127035091109742	-12.1602020234895	5.06333173966934e-34	1.37851958423226e-32	gained-close
Peak_10718	chr11	72410787	72411861	1075	72390114	72411713	overlapStart	0	276829	Smtnl2	72411861	103.253904415007	-2.60766861172467	0.214758138348035	-12.1423506079137	6.29900722442142e-34	1.70632782414194e-32	gained-close
Peak_68955	chrX	50840998	50841938	941	50841371	50893098	overlapStart	0	70415	Stk26	50841938	262.87425497284	-1.58701522603539	0.130769304318302	-12.1359919616341	6.80799506672179e-34	1.84207221456173e-32	gained-close
Peak_49109	chr5	8659858	8660680	823	8660092	8748570	overlapStart	0	18671	Abcb1a	8660680	137.84645751313	-2.14203072088932	0.176984885550722	-12.1029019750697	1.01942552961319e-33	2.73082537719717e-32	gained-close
Peak_50883	chr5	92254256	92256929	2674	92226974	92256278	overlapStart	0	19023	Ppef2	92256929	487.624297505556	1.54657725281367	0.128003954320812	12.0822615287145	1.31064558858813e-33	3.48048114594667e-32	gained-open
Peak_4004	chr1	173741394	173742580	1187	173723427	173741809	overlapStart	0	226691	Ifi207	173742580	216.779926188916	1.9842692551259	0.164706095556673	12.0473334542931	2.00326137778553e-33	5.26591942309717e-32	gained-open
Peak_37309	chr2	51438982	51439692	711	51421050	51437900	upstream	1081	73375	1700057H21Rik	51439692	186.992372278376	-2.02233254660169	0.167950661389568	-12.0412300247559	2.15715011246238e-33	5.65983572156095e-32	gained-close
Peak_51222	chr5	104982295	104982845	551	104935057	104982717	overlapStart	0	27405	Abcg3	104982845	158.930870472175	-2.02464630898513	0.169631522487093	-11.9355546616589	7.72422834901607e-33	1.95426878355535e-31	gained-close
Peak_50762	chr5	77407510	77408206	697	77349240	77408045	overlapStart	0	29817	Igfbp7	77408206	192.102389509188	-1.84596656138576	0.155038623646396	-11.9064947686581	1.09483654756236e-32	2.73740362175369e-31	gained-close
Peak_14057	chr12	26468969	26470024	1056	26469215	26479837	overlapStart	0	22169	Cmpk2	26470024	435.276334723983	-1.52735289646455	0.128684609717242	-11.8689631947487	1.71580825055417e-32	4.23714014211676e-31	gained-close
Peak_52452	chr5	135250568	135251524	957	135248938	135251047	overlapStart	0	14371	Fzd9	135251524	260.575202435056	-1.6045815718612	0.135468881023416	-11.8446506661839	2.29372133978665e-32	5.61093682327371e-31	gained-close
Peak_56003	chr6	118140916	118141400	485	118107452	118139140	upstream	1775	78752	Csgalnact2	118141400	217.288724147963	1.88852720222605	0.159634598529237	11.8303125990584	2.72126456444614e-32	6.62215293887236e-31	gained-open
Peak_58327	chr7	45361104	45361820	717	45366163	45367948	upstream	4342	50994	Mtag2	45361820	182.557206004181	-1.75795418213292	0.148662774958439	-11.8251134665311	2.89511268556398e-32	7.03300789666293e-31	gained-close
Peak_3497	chr1	160079085	160079773	689	160074735	160077985	upstream	1099	75255	4930562F07Rik	160079773	256.923668721409	-1.60753752371357	0.136269256439809	-11.796773283368	4.05566467640653e-32	9.75431861284016e-31	gained-close
Peak_66306	chr9	59577797	59578676	880	59578337	59607292	overlapStart	0	76183	Celf6	59578676	254.08088337869	-1.86516820582492	0.158600452293931	-11.7601695256722	6.26084600849099e-32	1.4862828259052e-30	gained-close
Peak_52138	chr5	123508004	123508806	803	123510460	123511882	upstream	1653	231727	B3gnt4	123508806	154.031986246909	-2.01627355479021	0.171743918103363	-11.7399997452995	7.94866906826308e-32	1.8744586676681e-30	gained-close
Peak_25203	chr15	98778901	98779407	507	98771752	98778150	upstream	750	22410	Wnt10b	98779407	73.2101958081929	-3.34408535645248	0.285202952838176	-11.7252830771002	9.45843212975685e-32	2.22152786522518e-30	gained-close
Peak_13487	chr11	121697564	121697943	380	121702427	121717389	upstream	4483	210029	Metrnl	121697943	153.962497194849	2.35550839514614	0.20111113829884	11.7124710996662	1.10025440914775e-31	2.57042446624781e-30	gained-open
Peak_45391	chr4	28812740	28813596	857	28813131	28967503	overlapStart	0	13841	Epha7	28813596	250.402777482555	-1.55416614252678	0.132736573267449	-11.7086504816974	1.15096954961624e-31	2.68265029655153e-30	gained-close
Peak_28407	chr17	12118692	12119556	865	12119284	12219640	overlapStart	0	68262	Agpat4	12119556	302.064576826836	1.57091853156823	0.134995364256561	11.6368331625275	2.67774525546664e-31	6.09932796367789e-30	gained-open
Peak_51611	chr5	113800178	113800808	631	113793729	113800358	overlapStart	0	231633	Tmem119	113800808	338.533172509827	-1.50851134455699	0.12965612608401	-11.6347093663708	2.74523599897824e-31	6.24697067866128e-30	gained-close
Peak_53335	chr6	3973274	3974216	943	3962595	3968354	upstream	4919	21789	Tfpi2	3974216	176.483199629519	-1.86604423367638	0.160409615756739	-11.6329948480535	2.80095034851243e-31	6.36961902698515e-30	gained-close
Peak_49472	chr5	25181000	25181810	811	25181480	25220289	overlapStart	0	67909	Galntl5	25181810	273.231834291143	-1.64227894438661	0.141396896083284	-11.6146746490057	3.47107142649303e-31	7.86548149771359e-30	gained-close
Peak_12350	chr11	102424775	102425935	1161	102430322	102436809	upstream	4386	14824	Grn	102425935	316.314943075551	1.65536389389211	0.142613840798695	11.6073158441102	3.78305192351734e-31	8.54757669304258e-30	gained-open
Peak_52532	chr5	136101911	136102876	966	136105522	136105603	upstream	2645	102465626	Mir7035	136102876	282.509701725668	-1.5285672360557	0.131865945241685	-11.5918270881396	4.53357196226404e-31	1.02038832615361e-29	gained-close
Peak_54214	chr6	48840993	48841551	559	48833811	48841374	overlapStart	0	65963	Tmem176b	48841551	57.7184560378796	-3.8339367845428	0.331481502038664	-11.5660655601096	6.12264588265867e-31	1.36620911132199e-29	gained-close
Peak_54214	chr6	48840993	48841551	559	48841483	48845858	overlapStart	0	66058	Tmem176a	48841551	57.7184560378796	-3.8339367845428	0.331481502038664	-11.5660655601096	6.12264588265867e-31	1.36620911132199e-29	gained-close
Peak_20626	chr14	32321813	32322227	415	32322019	32347820	overlapStart	0	239017	Ogdhl	32322227	121.817037915995	-2.18935249406212	0.189839057809377	-11.5326767806682	9.02919214706186e-31	1.99572749086004e-29	gained-close
Peak_59014	chr7	79935224	79936217	994	79925359	79935264	overlapStart	0	70420	Arpin	79936217	192.818581335858	2.04483825435107	0.177494094884587	11.5205987876988	1.03886532112649e-30	2.28468929340121e-29	gained-open
Peak_54202	chr6	48675885	48676614	730	48676135	48678704	overlapStart	0	317758	Gimap9	48676614	103.273269487905	-2.71037586919386	0.236292217067106	-11.470440723082	1.85711036273331e-30	4.00383403226485e-29	gained-close
Peak_38717	chr2	113327274	113328125	852	113327736	113716767	overlapStart	0	14260	Fmn1	113328125	264.46870771279	-1.56049408940106	0.136068427297394	-11.468450987461	1.90030388925532e-30	4.09318220716043e-29	gained-close
Peak_43588	chr3	96104127	96105050	924	96104527	96161129	overlapStart	0	229603	Otud7b	96105050	313.08170733297	-1.58346229457567	0.138138174660468	-11.4628870583217	2.02645130372563e-30	4.3568703030101e-29	gained-close
Peak_45631	chr4	41773350	41774306	957	41769467	41774176	overlapStart	0	20301	Ccl27a	41774306	234.793567379471	-1.59559013515134	0.139958512899308	-11.4004507628577	4.15959762592527e-30	8.80280809592688e-29	gained-close
Peak_49158	chr5	14514722	14515408	687	14514918	14863459	overlapStart	0	26875	Pclo	14515408	99.0019042635955	-2.38556687154692	0.209399521353985	-11.3924179774708	4.56152888431269e-30	9.63885824777048e-29	gained-close
Peak_48199	chr4	137468336	137468725	390	137468803	137570630	upstream	77	15530	Hspg2	137468725	108.101177965894	-2.40124059087167	0.211077760527307	-11.3760946907574	5.50082927396079e-30	1.15471313819423e-28	gained-close
Peak_60758	chr7	128209525	128210298	774	128205435	128206366	upstream	3158	12862	Cox6a2	128210298	123.22485320414	2.62395780385498	0.231123456787145	11.353057107793	7.16141879907808e-30	1.49346352850355e-28	gained-open
Peak_29750	chr17	37491651	37492647	997	37492468	37499674	overlapStart	0	258325	Olfr110	37492647	210.103150783329	2.00903277612565	0.177144273953985	11.3412233502253	8.199020574742e-30	1.70730970893225e-28	gained-open
Peak_14051	chr12	26414536	26415412	877	26414901	26415010	includeFeature	0	102466676	Mir6538	26415412	195.232741659064	-1.66726112292915	0.147022984496423	-11.3401392893756	8.30122299131333e-30	1.72756579243258e-28	gained-close
Peak_14051	chr12	26414536	26415412	877	26306794	26415262	overlapStart	0	108089	Rnf144a	26415412	195.232741659064	-1.66726112292915	0.147022984496423	-11.3401392893756	8.30122299131333e-30	1.72756579243258e-28	gained-close
Peak_56221	chr6	123049487	123050637	1151	123049962	123071555	overlapStart	0	69810	Clec4b1	123050637	179.901611892964	2.16381641866108	0.191127853631049	11.3213033974529	1.02930048795913e-29	2.12630135852836e-28	gained-open
Peak_15929	chr12	103532112	103532394	283	103532565	103613832	upstream	170	74521	Ppp4r4	103532394	120.693662322004	-2.20970897945638	0.1958335586465	-11.2836073384396	1.58126061692973e-29	3.23225155485668e-28	gained-close
Peak_51355	chr5	107707946	107708674	729	107698212	107703480	upstream	4465	654809	4930428O21Rik	107708674	250.541292882953	1.72014252295676	0.152455688016639	11.2829015783854	1.59400108529953e-29	3.25734493342983e-28	gained-open
Peak_32450	chr18	61535799	61537254	1456	61493794	61536536	overlapStart	0	328967	Arhgef37	61537254	234.12954425259	1.76211557261508	0.156602071063668	11.252185623386	2.25923291182181e-29	4.57145937117135e-28	gained-open
Peak_62056	chr8	32008641	32009815	1175	31818028	32009491	overlapStart	0	211323	Nrg1	32009815	208.908089919756	-1.61678164586294	0.143707214013817	-11.2505252917052	2.30216881346782e-29	4.65565182799707e-28	gained-close
Peak_50670	chr5	75574799	75576016	1218	75574987	75656722	overlapStart	0	16590	Kit	75576016	225.406629326164	-1.69178188872539	0.150405944047071	-11.248105249058	2.36620479374709e-29	4.78239310662433e-28	gained-close
Peak_14718	chr12	70347188	70347646	459	70244533	70347614	overlapStart	0	94090	Trim9	70347646	142.957346881492	-1.92441240656532	0.171247677684732	-11.2375971025323	2.66538699846591e-29	5.36851195759362e-28	gained-close
Peak_3615	chr1	164149053	164149452	400	164151835	164220277	upstream	2382	14067	F5	164149452	63.5965271783647	-3.21941374701921	0.286632803999898	-11.2318398386123	2.84492054290435e-29	5.72026411799057e-28	gained-close
Peak_60143	chr7	112953773	112954284	512	112953962	112957458	overlapStart	0	78748	Rassf10	112954284	72.6053624213849	-3.19641909583495	0.284982987486508	-11.216175126897	3.39644840211482e-29	6.80385934834386e-28	gained-close
Peak_26922	chr16	36183567	36184776	1210	36184212	36188111	overlapStart	0	433016	Gm5483	36184776	120.545981146484	3.08086275893783	0.274834003099246	11.2099038845106	3.64589072983243e-29	7.2868981064502e-28	gained-open
Peak_14318	chr12	36042302	36042742	441	36014555	36042478	overlapStart	0	66109	Tspan13	36042742	104.627384597951	-2.23397455151525	0.19929432162329	-11.2094239982309	3.66571067139777e-29	7.32442411729742e-28	gained-close
Peak_56233	chr6	123229396	123230565	1170	123229843	123247024	overlapStart	0	56620	Clec4n	123230565	217.633530983228	1.75383905542292	0.156884287718585	11.1791886933184	5.15591687617579e-29	1.02233508135945e-27	gained-open
Peak_22432	chr14	105898670	105899086	417	105891947	105896819	upstream	1850	24064	Spry2	105899086	257.920027669071	-1.52453333403638	0.136513760279276	-11.1676165898408	5.87358073722934e-29	1.15939160665383e-27	gained-close
Peak_34284	chr19	28677243	28678312	1070	28678224	28720027	overlapStart	0	320176	D930032P07Rik	28678312	196.105437229647	-1.77833402274979	0.159409565594454	-11.1557547761843	6.71207808241661e-29	1.31822506903983e-27	gained-close
Peak_8701	chr11	6623929	6624168	240	6620319	6620419	upstream	3509	100217467	Snora5c	6624168	210.772916874195	-1.61394579421641	0.144714179717795	-11.1526444565677	6.95093555897138e-29	1.36360828967088e-27	gained-close
Peak_11682	chr11	88618643	88619290	648	88619251	88623426	overlapStart	0	68397	0610039H22Rik	88619290	209.364715733191	-1.76697623033022	0.158934916754055	-11.1176088075381	1.02995503911141e-28	1.9976171669801e-27	gained-close
Peak_16408	chr12	116485542	116485983	442	116485720	117278167	overlapStart	0	19276	Ptprn2	116485983	111.328285411932	-2.3160665677698	0.208360243969683	-11.1156837007102	1.05241377514126e-28	2.03948425786079e-27	gained-close
Peak_36785	chr2	32720597	32721412	816	32721055	32755007	overlapStart	0	27387	Sh2d3c	32721412	225.843053714733	-1.82733385965451	0.16442984851955	-11.1131517550309	1.08269328726111e-28	2.0964254090415e-27	gained-close
Peak_56573	chr6	129472547	129473117	571	129461591	129472779	overlapStart	0	56644	Clec7a	129473117	121.642396190052	2.65326921985031	0.23886232303439	11.1079436310611	1.14772105151471e-28	2.21866374051492e-27	gained-open
Peak_7952	chr10	112835497	112836320	824	112837752	112845807	upstream	1431	100042639	Gm3942	112836320	166.05318534521	-1.91352961601774	0.173139262114734	-11.0519681824086	2.1446076293478e-28	4.06837346142952e-27	gained-close
Peak_39840	chr2	139677197	139678699	1503	139678178	139758581	overlapStart	0	319909	Ism1	139678699	70.2944082260633	-2.85931652452397	0.258850094199384	-11.0462255513862	2.28626401509999e-28	4.33007167623568e-27	gained-close
Peak_47887	chr4	133552853	133553822	970	133553376	133556686	overlapStart	0	23957	Nr0b2	133553822	186.959901774775	-1.86368298741992	0.168822819606198	-11.0392836215342	2.46994481486226e-28	4.67164616237149e-27	gained-close
Peak_10691	chr11	71289466	71289846	381	71242430	71285232	upstream	4233	627984	Nlrp1c-ps	71289846	119.893353706763	2.90959442293706	0.263851682042851	11.0273862967624	2.81940044932247e-28	5.31540354065411e-27	gained-open
Peak_28949	chr17	27207077	27207362	286	27189600	27204438	upstream	2638	224640	Lemd2	27207362	205.463482264033	-1.66326560940513	0.150861580910049	-11.0251105640796	2.89162948381674e-28	5.44718373861186e-27	gained-close
Peak_39854	chr2	140395064	140395594	531	140395430	142390050	overlapStart	0	72899	Macrod2	140395594	186.529192631052	-1.68511430432307	0.153157942000829	-11.0024611346237	3.7184243580663e-28	6.94683685413596e-27	gained-close
Peak_37963	chr2	78048568	78050201	1634	78051177	78194430	upstream	975	78158	4930440I19Rik	78050201	298.827383604758	1.51652868370638	0.138110641089911	10.9805346766808	4.74109327325432e-28	8.80114067054382e-27	gained-open
Peak_33048	chr18	80986630	80986997	368	80966359	80986578	upstream	51	20689	Sall3	80986997	101.246998234994	-2.4207960610947	0.220489849117446	-10.9791723781589	4.81313043470759e-28	8.93250269323492e-27	gained-close
Peak_58425	chr7	46734760	46735652	893	46727998	46732543	upstream	2216	20211	Saa4	46735652	269.198944352779	1.55141321191981	0.141450632478076	10.9678775184004	5.45375833003086e-28	1.00867202784824e-26	gained-open
Peak_7858	chr10	108332095	108333398	1304	108332189	108414391	overlapStart	0	114774	Pawr	108333398	78.9621122374844	-2.61922054932091	0.239179440889629	-10.9508599049262	6.5819774429784e-28	1.20809689612249e-26	gained-close
Peak_33845	chr19	11627186	11627714	529	11615520	11623719	upstream	3466	14126	Ms4a2	11627714	56.9969560048297	-6.09824001488696	0.557159455265211	-10.9452329261543	7.00374762174685e-28	1.28305633239245e-26	gained-close
Peak_61938	chr8	25848192	25848821	630	25849623	25937934	upstream	801	16532	Kcnu1	25848821	165.172750743552	-1.78951860942927	0.163561639630905	-10.9409432032322	7.34319408737513e-28	1.34359569770383e-26	gained-close
Peak_61938	chr8	25848192	25848821	630	25816000	25847694	upstream	497	23808	Ash2l	25848821	165.172750743552	-1.78951860942927	0.163561639630905	-10.9409432032322	7.34319408737513e-28	1.34359569770383e-26	gained-close
Peak_52667	chr5	137776496	137776874	379	137778918	137780107	upstream	2043	69871	Ppp1r35	137776874	214.80088457241	-1.62004480903745	0.148308390676292	-10.9234872123551	8.90112470145441e-28	1.61809895979031e-26	gained-close
Peak_39798	chr2	135658463	135659349	887	135659547	136013068	upstream	197	18798	Plcb4	135659349	107.86390954991	-2.26117357606869	0.207170490133537	-10.9145543586406	9.82097666531315e-28	1.77794154999589e-26	gained-close
Peak_64476	chr8	123567178	123567844	667	123538784	123566087	upstream	1090	100861480	Gm25018	123567844	188.052988893613	-1.7085659974856	0.15660284853828	-10.9101846705423	1.03046804064414e-27	1.85974820109355e-26	gained-close
Peak_52806	chr5	139776979	139777252	274	139751282	139775678	upstream	1300	68510	Ints1	139777252	48.6448444651366	-4.66545572543761	0.429549429027557	-10.8612779116005	1.76265091451352e-27	3.1304126763124e-26	gained-close
Peak_56878	chr6	143153610	143154508	899	143109214	143153931	overlapStart	0	102633311	Gm31108	143154508	118.049995140298	-2.18148943496835	0.200933491740248	-10.8567736322843	1.85176456617012e-27	3.27954051311135e-26	gained-close
Peak_62244	chr8	39642079	39643068	990	39581700	39642678	overlapStart	0	20288	Msr1	39643068	96.0376397287504	3.01569097105137	0.277995243708826	10.8479948463076	2.03848218086869e-27	3.59298494071032e-26	gained-open
Peak_23344	chr15	39962399	39963147	749	39962649	39967515	overlapStart	0	105976	AU022793	39963147	162.215089359961	2.05709288707789	0.189815035763363	10.837354790178	2.2899671167958e-27	4.01907567072673e-26	gained-open
Peak_12971	chr11	115929268	115930129	862	115933659	115965534	upstream	3529	57230	Sap30bp	115930129	129.578935606588	2.35882536483277	0.217875625715029	10.8264766060523	2.57888431965995e-27	4.51259715545686e-26	gained-open
Peak_150	chr1	13593232	13593655	424	13564693	13589910	upstream	3321	72265	Tram1	13593655	206.8908824098	-1.59370516192524	0.147269546993132	-10.8216884920517	2.71724614837649e-27	4.74641654107319e-26	gained-close
Peak_29904	chr17	45733849	45734284	436	45732864	45733844	upstream	4	72240	1600014C23Rik	45734284	155.565059358412	-2.04072495250093	0.188610307986604	-10.8197954517198	2.77395777579326e-27	4.84186114210325e-26	gained-close
Peak_55135	chr6	87728187	87728468	282	87730869	87755912	upstream	2400	58229	Efcc1	87728468	47.6172167206534	-3.85590515019572	0.357145391478848	-10.7964578073635	3.57739579995732e-27	6.20255870552303e-26	gained-close
Peak_65699	chr9	45112635	45113832	1198	45117876	45130070	upstream	4043	72821	Scn2b	45113832	368.922084194779	1.57645956446937	0.14647190757524	10.7628799990849	5.15339768702856e-27	8.84973653242836e-26	gained-open
Peak_53348	chr6	4749182	4749455	274	4674350	4747204	upstream	1977	20392	Sgce	4749455	56.6389020913019	-3.2355010933523	0.300907837213723	-10.7524653505593	5.76984769900676e-27	9.88655579463575e-26	gained-close
Peak_61215	chr7	142372759	142375607	2849	142326110	142373578	overlapStart	0	320802	Ifitm10	142375607	996.075985393743	2.39879654586552	0.223580910362089	10.7289863968291	7.44078470113258e-27	1.26630563806001e-25	gained-open
Peak_41046	chr2	166154792	166155831	1040	166073899	166155683	overlapStart	0	72043	Sulf2	166155831	185.253471958921	1.8759913804413	0.174942264737252	10.723488593559	7.89674830838239e-27	1.34129970722156e-25	gained-open
Peak_10730	chr11	72489867	72490418	552	72451638	72489920	overlapStart	0	216892	Spns2	72490418	223.635504478445	-1.60825765475509	0.150011617433222	-10.7208873704132	8.12203246033287e-27	1.3775634886107e-25	gained-close
Peak_62542	chr8	66860068	66860556	489	66860217	66890564	overlapStart	0	234344	Naf1	66860556	268.874441446337	-1.50230716320983	0.140644316391419	-10.6816059244715	1.2410589875651e-26	2.07780353246368e-25	gained-close
Peak_16104	chr12	110837539	110837993	455	110841029	110843804	upstream	3035	66709	4921507G05Rik	110837993	145.874509734342	-2.20935713708199	0.206873480206162	-10.679750419823	1.2661159288113e-26	2.11722719206778e-25	gained-close
Peak_52505	chr5	135806546	135807019	474	135806890	135874772	overlapStart	0	58212	Srrm3	135807019	138.82116274974	-2.02442506914463	0.18981915949484	-10.6650196667827	1.48367659156081e-26	2.46750510780019e-25	gained-close
Peak_45563	chr4	40914427	40915333	907	40920056	40931395	upstream	4722	20731	Spink4	40915333	118.880498295615	-2.19082840088902	0.205665304718007	-10.6523966397391	1.69932762513778e-26	2.82013592839063e-25	gained-close
Peak_1655	chr1	85269704	85270752	1049	85083075	85270566	overlapStart	0	381287	A530032D15Rik	85270752	200.184645257558	-1.56907612629858	0.147769028680094	-10.6184370318592	2.44622544134667e-26	4.01970779939002e-25	gained-close
Peak_1655	chr1	85269704	85270752	1049	85112418	85270566	overlapStart	0	620078	C130026I21Rik	85270752	200.184645257558	-1.56907612629858	0.147769028680094	-10.6184370318592	2.44622544134667e-26	4.01970779939002e-25	gained-close
Peak_44707	chr3	138520967	138522154	1188	138526191	138559696	upstream	4036	13684	Eif4e	138522154	122.937770185869	2.33198313099667	0.220663916021978	10.5680311173505	4.19202920843825e-26	6.76950459303247e-25	gained-open
Peak_57472	chr7	19403858	19404329	472	19394440	19404104	overlapStart	0	232943	Klc3	19404329	128.830569812506	-2.00876729398076	0.190257638923	-10.5581426604045	4.65786693489876e-26	7.48556786767312e-25	gained-close
Peak_29023	chr17	28080519	28080810	292	28066747	28080639	overlapStart	0	21463	Tcp11	28080810	104.861776710258	-2.08705788753522	0.198843843021179	-10.4959643498387	9.01523985860374e-26	1.42178056443323e-24	gained-close
Peak_12092	chr11	98740384	98741030	647	98741785	98769006	upstream	754	21833	Thra	98741030	148.011552025618	-1.90760176382883	0.181978000529088	-10.482595469137	1.0385376827655e-25	1.63199111148091e-24	gained-close
Peak_6961	chr10	80921942	80922481	540	80901363	80918245	upstream	3696	16907	Lmnb2	80922481	162.799202977041	-1.69001838487016	0.161796990216003	-10.4453017489012	1.53964971483448e-25	2.38947230472419e-24	gained-close
Peak_9513	chr11	48823681	48824130	450	48826138	48850195	upstream	2007	94089	Trim7	48824130	162.280493039818	-1.71434429316202	0.164253188587592	-10.4372055599262	1.67673941965005e-25	2.58848262642124e-24	gained-close
Peak_19968	chr13	120055633	120056189	557	120034605	120052204	upstream	3428	100861753	Gm21188	120056189	140.54842944116	2.33585932762359	0.225217835035327	10.3715557307315	3.34041553567183e-25	5.04138934287223e-24	gained-open
Peak_26415	chr16	23993234	23994114	881	23965052	23988612	upstream	4621	12053	Bcl6	23994114	238.06944109343	1.51675794223886	0.146445466540386	10.3571519014593	3.88353800151616e-25	5.83720897257464e-24	gained-open
Peak_27117	chr16	44811245	44812675	1431	44811785	44839150	overlapStart	0	239849	Cd200r4	44812675	193.544230839315	1.75885559723887	0.17061862698977	10.3086962324713	6.43685974051445e-25	9.50792510913016e-24	gained-open
Peak_64415	chr8	123044056	123044389	334	122883822	123042284	upstream	1771	77087	Ankrd11	123044389	156.626731334784	2.05218635535917	0.19924272407463	10.29993122655	7.05116938469186e-25	1.04021805312704e-23	gained-open
Peak_68874	chrX	41400405	41400835	431	41400854	41678601	upstream	18	53623	Gria3	41400835	69.1834540318928	-2.73761099753537	0.266146034283422	-10.2861235746239	8.1387228117507e-25	1.19763543213704e-23	gained-close
Peak_8589	chr11	4946817	4947928	1112	4947521	5042794	overlapStart	0	11764	Ap1b1	4947928	216.867254009261	-1.56469553361784	0.152733361166434	-10.2446218800409	1.25113119471923e-24	1.81517550846595e-23	gained-close
Peak_51075	chr5	100574590	100575348	759	100553733	100572205	upstream	2384	231507	Plac8	100575348	164.832343780318	-1.5880136900635	0.155097680718914	-10.2387971419217	1.32878068063447e-24	1.92464633364182e-23	gained-close
Peak_24264	chr15	76542811	76543138	328	76535723	76538746	upstream	4064	30840	Fbxl6	76543138	110.618119118194	-1.92352078451533	0.1880231611016	-10.2302331970472	1.45169388465265e-24	2.09747934100422e-23	gained-close
Peak_68581	chrX	9473317	9474774	1458	9435254	9469324	upstream	3992	13058	Cybb	9474774	101.064692468702	2.69970543332512	0.263921115440276	10.2292134860882	1.46705984599777e-24	2.11880782906428e-23	gained-open
Peak_6955	chr10	80848318	80849364	1047	80832801	80844039	upstream	4278	237403	Lingo3	80849364	174.198977724225	-1.65489568509011	0.16223517870023	-10.2005970489788	1.97057354068574e-24	2.82391160868232e-23	gained-close
Peak_40576	chr2	156839773	156841352	1580	156840007	156855570	overlapStart	0	228839	Tgif2	156841352	188.261074016781	-1.55143726184125	0.152225708127196	-10.1916902271521	2.15976057544797e-24	3.08619577094321e-23	gained-close
Peak_7869	chr10	110919803	110920570	768	110920176	110939514	overlapStart	0	13008	Csrp2	110920570	186.983930900337	-1.50086832336687	0.147805754895279	-10.1543294063905	3.16981791060243e-24	4.48655579261918e-23	gained-close
Peak_50271	chr5	57715046	57715998	953	57718081	58133235	upstream	2082	54216	Pcdh7	57715998	101.709386943797	-2.47589121419735	0.243918642099238	-10.1504796553846	3.29738768982552e-24	4.66053387445653e-23	gained-close
Peak_25587	chr16	3717702	3718593	892	3707215	3718124	overlapStart	0	54483	Mefv	3718593	184.185922066385	-1.61394191569123	0.159060167311383	-10.1467384510649	3.42622946123895e-24	4.83776426021888e-23	gained-close
Peak_64477	chr8	123569026	123569602	577	123538784	123566087	upstream	2938	100861480	Gm25018	123569602	157.309528206238	-1.67739767764162	0.165755189581821	-10.1197294749774	4.51662250353688e-24	6.31885669340818e-23	gained-close
Peak_6818	chr10	79788504	79789100	597	79793572	79820896	upstream	4471	18483	Palm	79789100	127.842511790226	-1.82033092620061	0.180271152690044	-10.0977383182902	5.65308865585591e-24	7.86019164752463e-23	gained-close
Peak_6818	chr10	79788504	79789100	597	79781474	79789042	overlapStart	0	73106	Prss57	79789100	127.842511790226	-1.82033092620061	0.180271152690044	-10.0977383182902	5.65308865585591e-24	7.86019164752463e-23	gained-close
Peak_56507	chr6	128887221	128887921	701	128887587	128898167	overlapStart	0	93675	Clec2i	128887921	191.768078436649	-1.53797601904257	0.152363983103801	-10.0940917119159	5.86716951245911e-24	8.151390638219e-23	gained-close
Peak_6819	chr10	79790487	79790935	449	79793572	79820896	upstream	2636	18483	Palm	79790935	76.4423874326074	-2.89981494799413	0.287696301206273	-10.079430760269	6.81196118289298e-24	9.41366056433169e-23	gained-close
Peak_6819	chr10	79790487	79790935	449	79781474	79789042	upstream	1444	73106	Prss57	79790935	76.4423874326074	-2.89981494799413	0.287696301206273	-10.079430760269	6.81196118289298e-24	9.41366056433169e-23	gained-close
Peak_29748	chr17	37440427	37440953	527	37445480	37446517	upstream	4526	258457	Olfr108	37440953	51.6503184267705	-3.02489980318008	0.300187579612942	-10.0766987331066	7.00398732510419e-24	9.67330923732832e-23	gained-close
Peak_3898	chr1	171646334	171647505	1172	171641840	171641900	upstream	4433	102465784	Mir7683	171647505	76.655019187782	3.53504623218062	0.351092780742557	10.0686953024327	7.5979263504454e-24	1.046064720722e-22	gained-open
Peak_21226	chr14	56085106	56085462	357	56082401	56082468	upstream	2637	102465572	Mir6949	56085462	40.0154591285816	-4.36344927470974	0.433804044525056	-10.0585721359214	8.42108068517091e-24	1.15757673793236e-22	gained-close
Peak_21226	chr14	56085106	56085462	357	56082163	56085197	overlapStart	0	17231	Mcpt8	56085462	40.0154591285816	-4.36344927470974	0.433804044525056	-10.0585721359214	8.42108068517091e-24	1.15757673793236e-22	gained-close
Peak_60575	chr7	126369175	126369942	768	126367971	126368045	upstream	1129	102466797	Mir7058	126369942	210.005836652794	-1.8407347288039	0.183172006009965	-10.0492142271116	9.26028468025355e-24	1.26920372382299e-22	gained-close
Peak_60575	chr7	126369175	126369942	768	126363827	126369568	overlapStart	0	16797	Lat	126369942	210.005836652794	-1.8407347288039	0.183172006009965	-10.0492142271116	9.26028468025355e-24	1.26920372382299e-22	gained-close
Peak_20675	chr14	33216252	33217318	1067	33216823	33369936	overlapStart	0	239027	Arhgap22	33217318	174.338984832623	1.81802634890125	0.181025065990658	10.0429536592191	9.86743940693924e-24	1.34846673407418e-22	gained-open
Peak_934	chr1	55405585	55406225	641	55405946	55754285	overlapStart	0	227120	Plcl1	55406225	97.1406456171631	-2.20701298368848	0.220654410776767	-10.0021249333705	1.49161459977384e-23	2.01913543188455e-22	gained-close
Peak_61076	chr7	139979084	139979688	605	139972303	139978755	upstream	328	381933	6430531B16Rik	139979688	105.441772158853	2.36143321887757	0.236169206560242	9.99890397766658	1.54093027644821e-23	2.08267610480136e-22	gained-open
Peak_61254	chr7	143058209	143058736	528	143021784	143053686	upstream	4522	97423	R74862	143058736	115.278365793215	-2.07315928686539	0.207561845810616	-9.98815210362405	1.71753617631442e-23	2.31334673811138e-22	gained-close
Peak_11390	chr11	83580838	83581364	527	83582061	83623693	upstream	696	100504464	E230016K23Rik	83581364	186.825152873425	1.68322821351682	0.168662089248543	9.97988475665326	1.86683479445974e-23	2.50865538685275e-22	gained-open
Peak_11390	chr11	83580838	83581364	527	83572917	83578636	upstream	2201	20308	Ccl9	83581364	186.825152873425	1.68322821351682	0.168662089248543	9.97988475665326	1.86683479445974e-23	2.50865538685275e-22	gained-open
Peak_29501	chr17	34257467	34258285	819	34263227	34269418	upstream	4941	14961	H2-Ab1	34258285	195.12455573339	1.80136024738154	0.180571861751642	9.97586351443354	1.94402996696168e-23	2.60889119159822e-22	gained-open
Peak_11635	chr11	87790050	87790650	601	87793784	87804412	upstream	3133	17523	Mpo	87790650	178.234430410524	-1.63577906277046	0.164023898230082	-9.97280933096651	2.0047651290879e-23	2.68731255348474e-22	gained-close
Peak_26039	chr16	16212792	16213626	835	16213345	16272712	overlapStart	0	67451	Pkp2	16213626	114.382113436239	-2.02931687712575	0.203673940538198	-9.96355680929715	2.20046376402001e-23	2.93784742360585e-22	gained-close
Peak_51112	chr5	101665143	101665547	405	101659184	101664711	upstream	431	18096	Nkx6-1	101665547	57.6027067664969	-2.86080232524694	0.287243568568855	-9.95950001422288	2.29212524793998e-23	3.05673359980557e-22	gained-close
Peak_43268	chr3	89243638	89243798	161	89246438	89249729	upstream	2639	66059	Krtcap2	89243798	147.924490674099	-1.68699593882438	0.169612111564512	-9.94619973340013	2.61997757589729e-23	3.48071391040737e-22	gained-close
Peak_54192	chr6	48541673	48542468	796	48536582	48537474	upstream	4198	69432	1700026J14Rik	48542468	59.2822504040973	-2.77211348375902	0.278710802252691	-9.9462003673819	2.61996089135002e-23	3.48071391040737e-22	gained-close
Peak_11369	chr11	83432326	83433207	882	83421635	83429521	upstream	2804	237891	Gas2l2	83433207	154.691107507881	-1.59311602180548	0.160362692532195	-9.93445543130701	2.94782220648039e-23	3.90074744919037e-22	gained-close
Peak_11369	chr11	83432326	83433207	882	83437694	83441232	upstream	4486	66330	1700020L24Rik	83433207	154.691107507881	-1.59311602180548	0.160362692532195	-9.93445543130701	2.94782220648039e-23	3.90074744919037e-22	gained-close
Peak_67548	chr9	103234219	103234921	703	103208876	103230286	upstream	3932	22041	Trf	103234921	115.111096631788	2.31439376645062	0.234558039594975	9.86704088440974	5.78459208650786e-23	7.4975198078554e-22	gained-open
Peak_51690	chr5	114826115	114826530	416	114821937	114823468	upstream	2646	330173	2610524H06Rik	114826530	154.337890520699	-1.56428233330478	0.158739410924355	-9.85440429818794	6.56045609019416e-23	8.46869992588969e-22	gained-close
Peak_46857	chr4	106908264	106908732	469	106911470	107049694	upstream	2737	72475	Ssbp3	106908732	136.808625625901	-1.81135157145165	0.183989231878678	-9.844878164642	7.21265626607268e-23	9.28326705649615e-22	gained-close
Peak_38925	chr2	119202814	119204018	1205	119208720	119217050	upstream	4701	72008	Zfyve19	119204018	128.899307166123	2.09675364749185	0.212979561382111	9.84485851076586	7.21406609559804e-23	9.28337793546013e-22	gained-open
Peak_5862	chr10	43742265	43743075	811	43746158	43765836	upstream	3082	69443	1700027J07Rik	43743075	112.144616369388	-1.84208481340646	0.187322147811157	-9.8337801212033	8.05377032432358e-23	1.03222784019698e-21	gained-close
Peak_56394	chr6	125527179	125528218	1040	125532587	125686679	upstream	4368	22371	Vwf	125528218	112.024031593894	2.31243344088122	0.235958273889155	9.8001795095667	1.12385740752531e-22	1.42453445801504e-21	gained-open
Peak_43557	chr3	95888138	95888997	860	95893921	95898592	upstream	4923	226548	Aph1a	95888997	137.974098151005	1.90534673807284	0.196026890987907	9.71982327766645	2.48211904065621e-22	3.07504777739519e-21	gained-open
Peak_67485	chr9	100488571	100489481	911	100457719	100486473	upstream	2097	213208	Il20rb	100489481	157.830689090536	1.77016722796258	0.182295102230559	9.71044864235435	2.72136614661921e-22	3.36490782723633e-21	gained-open
Peak_29296	chr17	31636752	31637822	1071	31612623	31637205	overlapStart	0	12411	Cbs	31637822	159.864706591999	-1.54928656536751	0.159754778562495	-9.69790437136401	3.07754561509129e-22	3.78529474961763e-21	gained-close
Peak_35263	chr19	53888451	53888822	372	53892231	53929861	upstream	3408	18569	Pdcd4	53888822	109.80775818487	-1.85823960161284	0.191841065727841	-9.68634945058671	3.44626910791928e-22	4.21957387125878e-21	gained-close
Peak_63487	chr8	94809944	94810682	739	94810453	94812036	overlapStart	0	20295	Ccl17	94810682	107.800280705175	2.52770743826953	0.261076669735623	9.68185874605029	3.60108431012606e-22	4.40451422954432e-21	gained-open
Peak_11586	chr11	86995545	86996584	1040	86936425	86993762	upstream	1782	77864	Ypel2	86996584	153.021266403682	1.77391460223936	0.183294144743436	9.67796655328178	3.74082066203766e-22	4.56666624004678e-21	gained-open
Peak_55242	chr6	88903737	88905016	1280	88883474	88898780	upstream	4956	17216	Mcm2	88905016	194.831731168055	1.60307014491997	0.166013745021243	9.65624951545327	4.62486307312493e-22	5.60683702519396e-21	gained-open
Peak_25019	chr15	93595512	93596596	1085	93499114	93595891	overlapStart	0	106042	Prickle1	93596596	74.3476747100633	-2.38090603078878	0.246676503518818	-9.65193683559388	4.82359446282773e-22	5.8366658119651e-21	gained-close
Peak_6831	chr10	79874575	79874944	370	79879667	79883174	upstream	4722	19152	Prtn3	79874944	128.818203625314	-1.94359934244443	0.201700892747159	-9.63604729742478	5.63147792606666e-22	6.77564661843941e-21	gained-close
Peak_6831	chr10	79874575	79874944	370	79860475	79874634	overlapStart	0	216152	Plppr3	79874944	128.818203625314	-1.94359934244443	0.201700892747159	-9.63604729742478	5.63147792606666e-22	6.77564661843941e-21	gained-close
Peak_61808	chr8	22227088	22227679	592	22227303	22261334	overlapStart	0	56229	Thsd1	22227679	108.363457087199	-1.89842250927243	0.197390216276027	-9.61761198243842	6.73771797781108e-22	8.04591137302613e-21	gained-close
Peak_36770	chr2	32585345	32585659	315	32587078	32599696	upstream	1418	20448	St6galnac4	32585659	147.954180186116	1.96334464812592	0.205047775274089	9.57505949772685	1.01798676753835e-21	1.20071419387432e-20	gained-open
Peak_53938	chr6	38507098	38507498	401	38507325	38507393	includeFeature	0	102466843	Mir7670	38507498	74.7208313784164	3.01970887021247	0.315534584034465	9.57013596291758	1.0676517556526e-21	1.2580245393008e-20	gained-open
Peak_26268	chr16	21204354	21204978	625	21204795	21223304	overlapStart	0	13845	Ephb3	21204978	138.728062502926	-1.65032208796247	0.172513235692461	-9.56635055471625	1.10745959502001e-21	1.30252328991344e-20	gained-close
Peak_41196	chr2	167496435	167496901	467	167481136	167492874	upstream	3560	263876	Spata2	167496901	153.564928210698	1.86062758851004	0.194601245458893	9.56123165667543	1.16363524572379e-21	1.36630220472705e-20	gained-open
Peak_632	chr1	40080778	40081511	734	40084768	40125225	upstream	3256	16178	Il1r2	40081511	109.593827323868	2.17300111168052	0.227792497678246	9.53938840755788	1.43677110934948e-21	1.67690244985866e-20	gained-open
Peak_57878	chr7	29303774	29304016	243	29304005	29317586	overlapStart	0	29861	Dpf1	29304016	135.404749831789	-1.73650530708466	0.182150120893896	-9.53337444171224	1.52252060516319e-21	1.77550611243615e-20	gained-close
Peak_56813	chr6	138081138	138081914	777	137983590	138079916	upstream	1221	277898	Slc15a5	138081914	113.839256568401	-1.73639551894929	0.18306445059049	-9.48515953451586	2.4201259761394e-21	2.7856670783618e-20	gained-close
Peak_47687	chr4	130787473	130788051	579	130792537	130826318	upstream	4485	20970	Sdc3	130788051	159.708672156921	1.74775342515583	0.184296314475399	9.48338782645126	2.4615859178248e-21	2.83199483554473e-20	gained-open
Peak_61188	chr7	141838840	141839106	267	141839072	141873085	overlapStart	0	74180	Muc5b	141839106	39.3377025974736	-3.78596125898089	0.399530504681487	-9.47602552150336	2.6415306993994e-21	3.03602872076332e-20	gained-close
Peak_43906	chr3	105054909	105055911	1003	105001915	105053146	upstream	1762	80281	Cttnbp2nl	105055911	133.457002772579	1.98379757252794	0.209684498468449	9.46086900566206	3.05394471017765e-21	3.49628312698154e-20	gained-open
Peak_14430	chr12	45073955	45075272	1318	44852486	45074483	overlapStart	0	217517	Stxbp6	45075272	192.086546639018	-1.59506928406562	0.168678490731654	-9.45626959991701	3.19125373708315e-21	3.65050070694589e-20	gained-close
Peak_10304	chr11	63059849	63060500	652	63061659	63094960	upstream	1158	71062	Tekt3	63060500	133.690317269528	-1.73596013816049	0.183803398720622	-9.44465744509504	3.56568704402935e-21	4.06753951624773e-20	gained-close
Peak_377	chr1	34579562	34579887	326	34579693	34590944	overlapStart	0	211383	Amer3	34579887	59.0225804132333	-2.54720078642487	0.269757853427074	-9.44254543126204	3.6383149947158e-21	4.14701682958562e-20	gained-close
Peak_34729	chr19	41265722	41266122	401	41210842	41264004	upstream	1717	107358	Tm9sf3	41266122	135.63364495033	1.86042681243869	0.197598108659296	9.41520556579057	4.72157581019243e-21	5.33749639420093e-20	gained-open
Peak_26580	chr16	30064048	30064403	356	30065357	30067796	upstream	953	15205	Hes1	30064403	75.8969969484065	-2.24687059476702	0.239135145355773	-9.39581921939684	5.67742694671356e-21	6.37794304106779e-20	gained-close
Peak_28590	chr17	17882367	17883291	925	17887824	17971677	upstream	4532	14289	Fpr2	17883291	85.4172838459205	2.58671805353097	0.276018069817383	9.37155330171817	7.14728240700599e-21	7.96536400843081e-20	gained-open
Peak_29350	chr17	32169744	32170438	695	32120893	32166852	upstream	2891	18131	Notch3	32170438	100.069027224534	-1.90263580451581	0.203296388149889	-9.35892576268012	8.05514762556831e-21	8.94728648121607e-20	gained-close
Peak_67335	chr9	95407316	95408032	717	95400926	95407270	upstream	45	54371	Chst2	95408032	42.6487852230489	-3.40706048156194	0.364595769171744	-9.34476143072586	9.20968600150104e-21	1.02038374145857e-19	gained-close
Peak_61232	chr7	142496621	142498386	1766	142498836	142516009	upstream	449	21957	Tnnt3	142498386	173.983727150293	1.66095997549813	0.177799645965493	9.34175074690807	9.47541533736869e-21	1.04883097199444e-19	gained-open
Peak_54616	chr6	65585081	65585767	687	65590398	65634040	upstream	4630	414084	Tnip3	65585767	128.695895319556	1.88260867572158	0.202152849334705	9.3127981223977	1.24508160891431e-20	1.36653064910778e-19	gained-open
Peak_35912	chr2	14224431	14224736	306	14229414	14332023	upstream	4677	17533	Mrc1	14224736	117.412714743294	-1.70051709265692	0.182709654341527	-9.30720983948804	1.31234438587309e-20	1.43855343567424e-19	gained-close
Peak_9440	chr11	44395473	44395923	451	44400063	44414677	upstream	4139	16160	Il12b	44395923	72.6307082938047	-2.17698881352236	0.235475397268859	-9.2450796931313	2.35065474945845e-20	2.5278585211022e-19	gained-close
Peak_62823	chr8	72013571	72014144	574	71988482	72009626	upstream	3944	72054	Cyp4f18	72014144	87.2989055436723	2.5910231504553	0.280469576157866	9.23816117936767	2.50769555399162e-20	2.69247110055258e-19	gained-open
Peak_25339	chr15	100421095	100421862	768	100423193	100428150	upstream	1330	432982	Gm5475	100421862	195.234433046713	1.55368193306825	0.168915972286379	9.19795749352908	3.64818035280058e-20	3.8660899468565e-19	gained-open
Peak_34921	chr19	44328018	44328532	515	44333326	44346743	upstream	4793	329065	Scd4	44328532	77.4722132876903	-2.07381609497007	0.226002175203719	-9.17608909339359	4.47032468233328e-20	4.71029568729086e-19	gained-close
Peak_34501	chr19	34167984	34168660	677	34122549	34166041	upstream	1942	52024	Ankrd22	34168660	135.075144797976	-1.62132633419649	0.17712874893548	-9.15337766421567	5.51806687314224e-20	5.77954874573005e-19	gained-close
Peak_67340	chr9	95749844	95750457	614	95705067	95750358	overlapStart	0	22063	Trpc1	95750457	111.185534923571	-1.73356950926579	0.189402992406919	-9.15280950546618	5.54717438043349e-20	5.80916799795344e-19	gained-close
Peak_19237	chr13	97559048	97560399	1352	97560000	97583994	overlapStart	0	328314	Gm5086	97560399	113.980795642581	1.98125189396852	0.216580919708648	9.14785982363433	5.80725873449346e-20	6.07609244854886e-19	gained-open
Peak_31426	chr18	11836890	11837111	222	11839274	11945627	upstream	2162	63955	Cables1	11837111	78.3239815201878	-2.06734978557987	0.226257089262827	-9.13717131390464	6.41071733604007e-20	6.69151419747727e-19	gained-close
Peak_38649	chr2	105398655	105399729	1075	105385948	105399319	overlapStart	0	19672	Rcn1	105399729	129.59847850506	-1.71277912134935	0.187705107071637	-9.12484027776435	7.18421161342864e-20	7.46887508278374e-19	gained-close
Peak_49188	chr5	15616397	15616796	400	15619099	15623864	upstream	2302	360220	Speer4d	15616796	37.2837660685164	-3.32369021013803	0.365157338353448	-9.1020769981649	8.86205734756388e-20	9.1521523775099e-19	gained-close
Peak_17019	chr13	21445981	21447231	1251	21421275	21441058	upstream	4922	319207	Pgbd1	21447231	84.3890952053718	2.39551517661797	0.263320191743557	9.09734707678974	9.25651656593675e-20	9.54687171057121e-19	gained-open
Peak_52874	chr5	140722031	140722630	600	140724127	140754690	upstream	1496	231842	Amz1	140722630	117.41079996941	1.93436364432957	0.21279134724657	9.09042434929531	9.86532569309505e-20	1.01538727154951e-18	gained-open
Peak_69509	chrX	136270074	136270411	338	136270253	136271978	overlapStart	0	12070	Bex3	136270411	68.8223902157828	-2.18179735366335	0.240330071248259	-9.07833689862959	1.10246456689254e-19	1.13205193952964e-18	gained-close
Peak_7832	chr10	105574459	105575612	1154	105187663	105574479	overlapStart	0	278279	Tmtc2	105575612	143.81587525759	-1.63305735505427	0.179987759789739	-9.0731578467447	1.15616618699538e-19	1.18407422886313e-18	gained-close
Peak_7832	chr10	105574459	105575612	1154	105574551	105583870	overlapStart	0	327812	Gm15663	105575612	143.81587525759	-1.63305735505427	0.179987759789739	-9.0731578467447	1.15616618699538e-19	1.18407422886313e-18	gained-close
Peak_57422	chr7	18925195	18925440	246	18925888	18965319	upstream	447	384569	Nova2	18925440	48.9530715600749	-2.83143743932984	0.312329687558366	-9.06554052374777	1.23987962554867e-19	1.26629500187279e-18	gained-close
Peak_41402	chr2	172437291	172437863	573	172440578	172469899	upstream	2714	66404	Rtf2	172437863	177.950621046064	1.52533227173594	0.168276231927248	9.06445464262236	1.25229121371041e-19	1.27841251369945e-18	gained-open
Peak_21492	chr14	62864296	62864748	453	62865542	62865651	upstream	793	102465311	Mir6541	62864748	113.543351051522	-1.77002917784611	0.195488585828642	-9.0543863230851	1.3733785287465e-19	1.39775295830182e-18	gained-close
Peak_3627	chr1	164458266	164458890	625	164437099	164458355	overlapStart	0	11931	Atp1b1	164458890	44.1821846317218	-2.99394591127264	0.330668072274588	-9.05423342107991	1.37530387112624e-19	1.39950937889867e-18	gained-close
Peak_11752	chr11	93887061	93887325	265	93859243	93885766	upstream	1294	217109	Utp18	93887325	87.0459311706153	2.41184315847861	0.266726814683958	9.04237229142626	1.53307947261534e-19	1.55554778143709e-18	gained-open
Peak_58315	chr7	45204331	45204934	604	45183676	45204892	overlapStart	0	384619	Ccdc155	45204934	149.272384668155	-1.62785906514535	0.180049502256023	-9.04117503657742	1.54996616792352e-19	1.5724544662951e-18	gained-close
Peak_26199	chr16	19760137	19761357	1221	19760234	19772753	overlapStart	0	108105	B3gnt5	19761357	99.8627636581171	-1.81424211629563	0.200673375278762	-9.04077142159697	1.55570028407351e-19	1.5780435062616e-18	gained-close
Peak_21048	chr14	51913163	51913826	664	51918425	51920700	upstream	4598	219038	Tppp2	51913826	76.5856532747802	-2.30574408184977	0.255394270511288	-9.02817466199916	1.74559056301186e-19	1.76555383553088e-18	gained-close
Peak_21048	chr14	51913163	51913826	664	51905271	51913488	overlapStart	0	29811	Ndrg2	51913826	76.5856532747802	-2.30574408184977	0.255394270511288	-9.02817466199916	1.74559056301186e-19	1.76555383553088e-18	gained-close
Peak_4547	chr1	191165999	191167580	1582	191162584	191164817	upstream	1181	619288	Fam71a	191167580	104.378582990429	2.05001320009946	0.22780815395065	8.99885787469906	2.2807794853832e-19	2.29034804765722e-18	gained-open
Peak_14436	chr12	46819331	46819813	483	46694517	46818775	upstream	555	664883	Nova1	46819813	71.9565767798552	-2.23818346685465	0.249044287644905	-8.98709015982699	2.53862358893926e-19	2.54235739201881e-18	gained-close
Peak_53061	chr5	144898194	144899052	859	144896732	144896816	upstream	1377	102465629	Mir7039	144899052	138.81234601472	1.93574244350026	0.215442406420953	8.98496482497513	2.58817073906173e-19	2.59012811704646e-18	gained-open
Peak_63617	chr8	105295947	105296413	467	105297663	105305370	upstream	1249	104394	E2f4	105296413	77.7858227656824	-2.08609996154228	0.232404277908553	-8.97616851253973	2.80359856452528e-19	2.80132181401698e-18	gained-close
Peak_63617	chr8	105295947	105296413	467	105289924	105296098	overlapStart	0	277978	Exoc3l	105296413	77.7858227656824	-2.08609996154228	0.232404277908553	-8.97616851253973	2.80359856452528e-19	2.80132181401698e-18	gained-close
Peak_17056	chr13	21896805	21897069	265	21896918	21897049	includeFeature	0	100316716	Mir1983	21897069	34.0601919117924	-3.67993329654387	0.410366431491277	-8.96743255331811	3.03506237352689e-19	3.02656091913211e-18	gained-close
Peak_47377	chr4	123610952	123612596	1645	123616420	123616521	upstream	3823	102465214	Mir6398	123612596	88.5152347952224	2.40676298259113	0.269089888579489	8.94408554441156	3.75041987956993e-19	3.71403837071277e-18	gained-open
Peak_11345	chr11	83116473	83117353	881	83116845	83122659	overlapStart	0	20555	Slfn1	83117353	178.727974310534	1.57422244026918	0.176054137796546	8.94169520791611	3.83245391480359e-19	3.79366958937079e-18	gained-open
Peak_55653	chr6	108665584	108665947	364	108577036	108660934	upstream	4649	75394	0610040F04Rik	108665947	113.609166616913	1.91865570576387	0.215122211781171	8.91891027838437	4.70898665506449e-19	4.63061358776834e-18	gained-open
Peak_30992	chr17	84511457	84512599	1143	84511895	84622142	overlapStart	0	213556	Plekhh2	84512599	112.125511016217	-1.72879073496618	0.194386683156787	-8.89356568511324	5.91786548777362e-19	5.76921963099844e-18	gained-close
Peak_24262	chr15	76522997	76523498	502	76516203	76522129	upstream	867	170729	Scrt1	76523498	54.9218401541306	-2.46441801951803	0.27723449192377	-8.88929080366975	6.15001766818023e-19	5.98140603414899e-18	gained-close
Peak_40855	chr2	163749688	163750259	572	163726571	163750239	overlapStart	0	11486	Ada	163750259	111.926829598322	-1.83994213440631	0.207475456156414	-8.86823997639119	7.43110504179552e-19	7.18155835601826e-18	gained-close
Peak_49160	chr5	14940623	14941118	496	14933631	14938475	upstream	2147	624245	Speer4e	14941118	40.4558207473353	-3.06349178762478	0.345607146450435	-8.86408692380476	7.71335629776987e-19	7.44304921892535e-18	gained-close
Peak_49160	chr5	14940623	14941118	496	14945294	14978541	upstream	4175	74062	Speer8-ps1	14941118	40.4558207473353	-3.06349178762478	0.345607146450435	-8.86408692380476	7.71335629776987e-19	7.44304921892535e-18	gained-close
Peak_26939	chr16	36455067	36455985	919	36450537	36455392	overlapStart	0	20863	Stfa3	36455985	87.5168767156598	2.44631510222642	0.277262254855328	8.82310902182802	1.11324868134692e-18	1.06355359990333e-17	gained-open
Peak_15369	chr12	85270246	85270823	578	85234466	85270599	overlapStart	0	217716	Mlh3	85270823	133.617756436976	-1.52256377725259	0.172616695922436	-8.82048963523634	1.13960296297574e-18	1.08828669120885e-17	gained-close
Peak_29502	chr17	34261481	34261991	511	34263227	34269418	upstream	1235	14961	H2-Ab1	34261991	130.115383857308	1.74277675970552	0.197913906764551	8.80573168503425	1.30001699556501e-18	1.23441770850204e-17	gained-open
Peak_64138	chr8	119844723	119844968	246	119809214	119840579	upstream	4143	72042	Cotl1	119844968	117.249549338929	1.99343538557593	0.226746951631518	8.79145395884052	1.47636726495613e-18	1.39619829278813e-17	gained-open
Peak_49777	chr5	33438256	33438546	291	33430734	33434090	upstream	4165	672284	Nkx1-1	33438546	133.2376080984	-1.60266533467893	0.182663982787801	-8.77384424788729	1.72668016047934e-18	1.6226351292362e-17	gained-close
Peak_23551	chr15	55905900	55907010	1111	55639154	55906949	overlapStart	0	20649	Sntb1	55907010	160.85442931909	-1.51307208250583	0.17268727521955	-8.76191995375546	1.91952566657887e-18	1.7959190711603e-17	gained-close
Peak_8380	chr10	128528916	128529319	404	128510248	128525859	upstream	3056	23943	Esyt1	128529319	120.39979350032	1.81452053707839	0.207176668741176	8.75832470955142	1.98173601736556e-18	1.85115999075517e-17	gained-open
Peak_29417	chr17	33552199	33552638	440	33555707	33607764	upstream	3068	17916	Myo1f	33552638	162.870244100335	1.5087891522989	0.172369537636915	8.75322387577015	2.07342797091868e-18	1.93449147112465e-17	gained-open
Peak_39469	chr2	129309955	129310435	481	129299610	129309972	overlapStart	0	16175	Il1a	129310435	74.2061841448142	2.54207233809352	0.290428964840708	8.75281960767162	2.08087167823362e-18	1.94117815123115e-17	gained-open
Peak_56906	chr6	145075105	145076227	1123	144993835	145076157	overlapStart	0	12035	Bcat1	145076227	112.359076167633	-1.62872370190539	0.186264982415559	-8.74412184611111	2.24756805897275e-18	2.09223109476952e-17	gained-close
Peak_69498	chrX	134717719	134718151	433	134717938	134721917	overlapStart	0	78248	Armcx1	134718151	52.380478428242	-2.44858955133058	0.280217976454325	-8.7381601363098	2.36937488492835e-18	2.20036240472299e-17	gained-close
Peak_62424	chr8	54077512	54078169	658	54077532	54186454	overlapStart	0	22341	Vegfc	54078169	33.3844319032286	-3.46542864334506	0.397663094186108	-8.7144839287581	2.92086141996282e-18	2.69360649528274e-17	gained-close
Peak_1648	chr1	85198422	85198839	418	85199611	85213772	upstream	771	665378	Gm7609	85198839	31.5556958483361	-3.62634111844303	0.416531008915133	-8.70605318890409	3.14639236721479e-18	2.8954984370801e-17	gained-close
Peak_5490	chr10	28074642	28075159	518	28074820	28597397	overlapStart	0	19272	Ptprk	28075159	35.575296585535	-3.29431800021993	0.378444327799257	-8.70489463900057	3.17869909859614e-18	2.92407796277339e-17	gained-close
Peak_13855	chr12	17016271	17016570	300	17004958	17011727	upstream	4543	73667	2410004P03Rik	17016570	33.6670635232085	-3.53310156001286	0.40665022497269	-8.68830592741007	3.67884010979082e-18	3.37001166953971e-17	gained-close
Peak_6301	chr10	62231023	62231507	485	62185396	62231218	overlapStart	0	70423	Tspan15	62231507	75.3568502334437	-2.02438513768943	0.23300687232009	-8.68809197570986	3.6857734033614e-18	3.37592198116684e-17	gained-close
Peak_57239	chr7	6728961	6729863	903	6730583	6967219	upstream	719	57775	Usp29	6729863	118.16137718982	-1.84134333862383	0.211960049675841	-8.68721884826822	3.71420186050715e-18	3.4015163108246e-17	gained-close
Peak_34500	chr19	34166011	34166212	202	34122549	34166041	overlapStart	0	52024	Ankrd22	34166212	70.3096434526393	-2.3320877125455	0.268777915234193	-8.67663442702683	4.07652832117544e-18	3.72410004883414e-17	gained-close
Peak_15943	chr12	104235796	104236521	726	104236242	104241934	overlapStart	0	20715	Serpina3g	104236521	141.547621706458	-1.50345885066876	0.173279348666629	-8.67650335852344	4.08122699983562e-18	3.72790691820098e-17	gained-close
Peak_15943	chr12	104235796	104236521	726	104236242	104254405	overlapStart	0	546546	Serpina3h	104236521	141.547621706458	-1.50345885066876	0.173279348666629	-8.67650335852344	4.08122699983562e-18	3.72790691820098e-17	gained-close
Peak_17155	chr13	24280843	24281478	636	24012481	24280790	upstream	52	68732	Carmil1	24281478	167.031459407818	-1.50794115537325	0.174602938127271	-8.63640195031592	5.80111450300998e-18	5.25170470426745e-17	gained-close
Peak_29749	chr17	37482805	37483753	949	37480851	37483529	overlapStart	0	14990	H2-M2	37483753	93.3837865067927	2.06831725137983	0.239584995481843	8.63291646131729	5.98071162020408e-18	5.40870726060313e-17	gained-open
Peak_17395	chr13	32850281	32851293	1013	32842092	32851185	overlapStart	0	66222	Serpinb1a	32851293	123.92807215442	-1.6311495226163	0.189194336801772	-8.62155575156212	6.60505133952878e-18	5.94420718074133e-17	gained-close
Peak_16054	chr12	109449812	109450420	609	109452823	109463336	upstream	2402	13386	Dlk1	109450420	38.5785642980856	-2.91653766766882	0.33841605851284	-8.61820115890914	6.80141193625519e-18	6.1154285041716e-17	gained-close
Peak_49184	chr5	15533101	15533354	254	15473816	15529222	upstream	3878	100861755	Gm21190	15533354	31.185908262146	-3.747012012444	0.435000088536993	-8.61381896506293	7.06662504932748e-18	6.34575690889224e-17	gained-close
Peak_49184	chr5	15533101	15533354	254	15536013	15714596	upstream	2658	75858	Speer4cos	15533354	31.185908262146	-3.747012012444	0.435000088536993	-8.61381896506293	7.06662504932748e-18	6.34575690889224e-17	gained-close
Peak_69279	chrX	96235746	96236286	541	96239926	96243642	upstream	3639	100038363	F630028O10Rik	96236286	121.942558807118	-1.59810319474183	0.185566492477765	-8.61202458161092	7.17814470781288e-18	6.44177636331466e-17	gained-close
Peak_49192	chr5	15659212	15659803	592	15652288	15657059	upstream	2152	381715	4930572O03Rik	15659803	46.3842646985675	-3.27881267217201	0.381392824353702	-8.59694378814859	8.18670614102299e-18	7.31504983804772e-17	gained-close
Peak_64521	chr8	123805677	123806394	718	123805996	123835291	overlapStart	0	19341	Rab4a	123806394	98.6017413175771	-1.70980762481425	0.19898712047891	-8.59255423516453	8.50569970677734e-18	7.58944322564141e-17	gained-close
Peak_52525	chr5	136034616	136035632	1017	136038496	136044993	upstream	2863	100647	Upk3b	136035632	134.666340743073	1.63619836003922	0.190694221024035	8.58021995240746	9.46918981404617e-18	8.42769910188452e-17	gained-open
Peak_41378	chr2	170496926	170497587	662	170482957	170497145	overlapStart	0	13081	Cyp24a1	170497587	130.910753271269	-1.54958957128601	0.180641278365755	-8.57826951461484	9.63110709398634e-18	8.56528574464296e-17	gained-close
Peak_9459	chr11	44616988	44617314	327	44618100	45008096	upstream	785	13591	Ebf1	44617314	81.5770541154333	-1.83607314550819	0.214345006995747	-8.56597114736905	1.07168720902718e-17	9.50317853466976e-17	gained-close
Peak_21672	chr14	66340399	66341409	1011	66344296	66361680	upstream	2886	56471	Stmn4	66341409	92.7510130955897	2.15813615970683	0.252050070458086	8.56233111057872	1.10607998964806e-17	9.79948306139301e-17	gained-open
Peak_58079	chr7	35215319	35215498	180	35200878	35215345	overlapStart	0	435965	Lrp3	35215498	27.9679186228226	-4.20435346048997	0.491897996447272	-8.54720590621606	1.26104100863636e-17	1.112460239732e-16	gained-close
Peak_6082	chr10	58239164	58239738	575	58234848	58236660	upstream	2503	245263	Gm4981	58239738	41.3700054982271	-2.91628898946004	0.341393089328203	-8.54231992568668	1.31553607659495e-17	1.15791279693566e-16	gained-close
Peak_23398	chr15	42677401	42677696	296	42424667	42676977	upstream	423	11600	Angpt1	42677696	80.122047311826	-2.00935562746397	0.235267269521279	-8.54073595342269	1.33369657399656e-17	1.1725729199461e-16	gained-close
Peak_21612	chr14	65262019	65262850	832	65192441	65262463	overlapStart	0	14365	Fzd3	65262850	134.307813470404	-1.5291803388718	0.179640067320155	-8.51246807955424	1.70269645005893e-17	1.48434071015517e-16	gained-close
Peak_21612	chr14	65262019	65262850	832	65266701	65321502	upstream	3850	50759	Fbxo16	65262850	134.307813470404	-1.5291803388718	0.179640067320155	-8.51246807955424	1.70269645005893e-17	1.48434071015517e-16	gained-close
Peak_44559	chr3	133094437	133094976	540	132982550	133092033	upstream	2403	67553	Gstcd	133094976	75.0372203182908	2.4828565462835	0.292113879562963	8.49961853917435	1.90214727363761e-17	1.64980577222393e-16	gained-open
Peak_61090	chr7	140132034	140132589	556	140137564	140150786	upstream	4974	212508	Mtg1	140132589	143.415170830138	-1.63360397795421	0.19221032594211	-8.49904379458896	1.91158779804667e-17	1.65758391494074e-16	gained-close
Peak_8972	chr11	22001456	22002277	822	21994764	22001651	overlapStart	0	18423	Otx1	22002277	123.143172933925	-1.50310668848337	0.177263230696431	-8.47951762234035	2.26129499242361e-17	1.95021399045309e-16	gained-close
Peak_15826	chr12	101718119	101718955	837	101645446	101718523	overlapStart	0	74413	Tc2n	101718955	104.735313346263	-1.63254836126858	0.192624685366418	-8.47528113109225	2.3451252086554e-17	2.01854033208921e-16	gained-close
Peak_869	chr1	53848237	53848757	521	53849424	53849495	upstream	666	102465783	Mir7681	53848757	62.7436354622624	2.89939105093352	0.342121127606714	8.47475007233846	2.35584754119309e-17	2.02727184793245e-16	gained-open
Peak_45984	chr4	53823760	53824065	306	53826045	53862018	upstream	1979	52076	Tmem38b	53824065	121.961601501596	-1.54228747901492	0.182167924862695	-8.46629548081738	2.53321037628325e-17	2.17349698213694e-16	gained-close
Peak_47859	chr4	133262714	133263344	631	133253090	133263087	overlapStart	0	269589	Sytl1	133263344	57.6825552706598	-2.31565630456984	0.273699075583251	-8.46059234812975	2.66022790750742e-17	2.27718496078626e-16	gained-close
Peak_52021	chr5	122207399	122208078	680	122209729	122242297	upstream	1650	74096	Hvcn1	122208078	180.685991271212	1.52815278386598	0.1809080074985	8.44712627703144	2.98560741817841e-17	2.54577027427485e-16	gained-open
Peak_57783	chr7	28175332	28175713	382	28179483	28187298	upstream	3769	13549	Dyrk1b	28175713	80.1982556770135	2.24073683648318	0.265558023383704	8.43784272804874	3.23248169197879e-17	2.74992283483198e-16	gained-open
Peak_56509	chr6	128890915	128891273	359	128848044	128891124	overlapStart	0	232406	BC035044	128891273	103.127145504805	-1.7979326248095	0.213415490269778	-8.4245647892603	3.62093598999084e-17	3.06884717566197e-16	gained-close
Peak_4472	chr1	186116870	186117396	527	186087732	186117310	overlapStart	0	226791	Lyplal1	186117396	49.2954992533795	-2.41043136576727	0.286198908956074	-8.42222416067008	3.69403417063363e-17	3.12890940204165e-16	gained-close
Peak_46446	chr4	84675716	84676015	300	84272542	84675086	upstream	629	242509	Bnc2	84676015	36.7834330613034	-3.03635371942955	0.361460685000905	-8.4002322947569	4.45596278063422e-17	3.7543252966629e-16	gained-close
Peak_22400	chr14	104467675	104468169	495	104462320	104467999	overlapStart	0	18996	Pou4f1	104468169	89.0844573972461	-1.77765939234505	0.211686947170405	-8.39758622865895	4.55749855249186e-17	3.83848980403401e-16	gained-close
Peak_65367	chr9	35686724	35687574	851	35685079	35687371	overlapStart	0	100312987	Pate1	35687574	128.273058031403	1.68543152500798	0.200784151348001	8.39424582912812	4.6889417728795e-17	3.94493226196447e-16	gained-open
Peak_13971	chr12	24831256	24831805	550	24831599	24960301	overlapStart	0	67216	Mboat2	24831805	53.4046480534775	-2.5976896387661	0.309766069441659	-8.38597217393218	5.0308235553251e-17	4.22294133340054e-16	gained-close
Peak_26920	chr16	36156307	36157290	984	36156811	36161948	overlapStart	0	268885	Stfa2l1	36157290	59.9675994903643	3.21314964380161	0.386190182908831	8.32012253548182	8.78724201626664e-17	7.24178195448682e-16	gained-open
Peak_49187	chr5	15575203	15575831	629	15576947	15582097	upstream	1115	105242399	Gm21083	15575831	36.4390267211426	-2.9714614205874	0.357587700553649	-8.30974168291225	9.59106266756655e-17	7.88015461650006e-16	gained-close
Peak_57238	chr7	6410132	6410397	266	6415175	6431086	upstream	4777	100042450	Smim17	6410397	133.064534230199	-1.55761025587978	0.187676487885427	-8.29944269220702	1.0460091052548e-16	8.56506206407877e-16	gained-close
Peak_57946	chr7	30453840	30454238	399	30458313	30488609	upstream	4074	54631	Nphs1	30454238	49.9777298395655	-2.36572183733731	0.285544836831905	-8.28493998905666	1.18168654890711e-16	9.62993524686294e-16	gained-close
Peak_442	chr1	36470068	36470461	394	36471597	36508776	upstream	1135	94220	Cnnm4	36470461	133.41067419602	1.614865616497	0.195023972848285	8.28034416955117	1.22819791937881e-16	9.99155604683846e-16	gained-open
Peak_60362	chr7	120149709	120150653	945	120132361	120145290	upstream	4418	22787	Zp2	120150653	103.286939177374	1.91256326407469	0.231340864207062	8.26729540684542	1.37032122531799e-16	1.11039559208812e-15	gained-open
Peak_28593	chr17	17887810	17888287	478	17887824	17971677	overlapStart	0	14289	Fpr2	17888287	51.107515014753	3.57241182323106	0.434566948089302	8.22062478275946	2.02445723961871e-16	1.62023575928539e-15	gained-open
Peak_28593	chr17	17887810	17888287	478	17876471	17883939	upstream	3870	14293	Fpr1	17888287	51.107515014753	3.57241182323106	0.434566948089302	8.22062478275946	2.02445723961871e-16	1.62023575928539e-15	gained-open
Peak_59968	chr7	107370572	107371216	645	107370790	107548655	overlapStart	0	60510	Syt9	107371216	33.1477878747818	-3.18131650810456	0.389201143769572	-8.17396495111038	2.98416541742149e-16	2.3581799799439e-15	gained-close
Peak_48584	chr4	146067225	146067772	548	146067524	146068718	overlapStart	0	627585	Gm13034	146067772	97.254781143813	-1.67364427354704	0.20483621859138	-8.17064621216099	3.0674193979714e-16	2.42096921717227e-15	gained-close
Peak_41434	chr2	173276448	173276716	269	173224465	173276533	overlapStart	0	65112	Pmepa1	173276716	69.4036449098385	-1.94056926451515	0.237571096038585	-8.16837273924929	3.12576887148984e-16	2.46563432981888e-15	gained-close
Peak_39940	chr2	144267709	144267932	224	144265982	144266202	upstream	1506	100313519	Snord17	144267932	116.016742150258	1.73991046916672	0.213100700351743	8.16473369770645	3.22145094698558e-16	2.53825434518526e-15	gained-open
Peak_39940	chr2	144267709	144267932	224	144270904	144281227	upstream	2971	74528	Mgme1	144267932	116.016742150258	1.73991046916672	0.213100700351743	8.16473369770645	3.22145094698558e-16	2.53825434518526e-15	gained-open
Peak_58777	chr7	67759265	67759980	716	67730161	67759742	overlapStart	0	233335	Synm	67759980	124.986012512628	-1.52709349468989	0.187452796609448	-8.14654954373148	3.74455375792458e-16	2.93230000786651e-15	gained-close
Peak_27109	chr16	44765643	44766546	904	44765736	44794977	overlapStart	0	57781	Cd200r1	44766546	150.603367217711	1.51540755088136	0.186116816888047	8.14223870910553	3.88035256242944e-16	3.03288494662726e-15	gained-open
Peak_22344	chr14	103034172	103034372	201	102987412	103033803	upstream	368	71264	4933432I03Rik	103034372	102.492347953667	1.78835530956742	0.219996760471793	8.12900747143829	4.32819639619919e-16	3.37314588126056e-15	gained-open
Peak_69310	chrX	100729587	100730158	572	100729847	100738901	overlapStart	0	71584	Gdpd2	100730158	92.7043253900273	-1.66143066571354	0.204895131514329	-8.1086878611235	5.11693059278984e-16	3.96142723550204e-15	gained-close
Peak_45713	chr4	44083518	44084338	821	44034075	44084177	overlapStart	0	50798	Gne	44084338	99.8660812428975	-1.62085327452044	0.199977270999723	-8.10518748664536	5.26642424172757e-16	4.07356492053689e-15	gained-close
Peak_58358	chr7	45616404	45616576	173	45617606	45621059	upstream	1029	14343	Fut1	45616576	25.5632387642643	-3.96687678187133	0.490672978191874	-8.08456336130275	6.23873058927539e-16	4.79864984007075e-15	gained-close
Peak_58358	chr7	45616404	45616576	173	45613890	45615490	upstream	913	56636	Fgf21	45616576	25.5632387642643	-3.96687678187133	0.490672978191874	-8.08456336130275	6.23873058927539e-16	4.79864984007075e-15	gained-close
Peak_61087	chr7	140112075	140112519	445	140115899	140134334	upstream	3379	212503	Paox	140112519	114.361577061174	1.6827364963791	0.208896793612259	8.05534861153728	7.92526037944651e-16	6.05470899990982e-15	gained-open
Peak_50725	chr5	77012939	77013608	670	77016023	77061529	upstream	2414	71868	Thegl	77013608	104.008560245173	1.77038313359615	0.220046851392716	8.04548268875959	8.59061456994019e-16	6.5494681121167e-15	gained-open
Peak_38017	chr2	80446377	80447700	1324	80411970	80447396	overlapStart	0	20378	Frzb	80447700	81.9026473452194	-1.70907537065665	0.212435058391072	-8.04516629035122	8.61283904710434e-16	6.56569827054966e-15	gained-close
Peak_63338	chr8	88695673	88695971	299	88697028	88751946	upstream	1056	74256	Cyld	88695971	64.240512480937	2.43125421356546	0.302813202407619	8.02889105968615	9.83576464613332e-16	7.46630243454127e-15	gained-open
Peak_3889	chr1	171608332	171609009	678	171588613	171607410	upstream	921	17085	Ly9	171609009	102.104240213204	1.78600403089886	0.223299784949948	7.99823444209399	1.26215884638575e-15	9.49163482453054e-15	gained-open
Peak_23397	chr15	42676243	42677052	810	42424667	42676977	overlapStart	0	11600	Angpt1	42677052	75.9660220315273	-1.8456652900711	0.23089085457281	-7.99366996794184	1.3098009623644e-15	9.84041466454229e-15	gained-close
Peak_65845	chr9	48609643	48610178	536	48591877	48605123	upstream	4519	18113	Nnmt	48610178	63.719302141285	2.4180688195189	0.303361553877567	7.97091387689424	1.57505249196613e-15	1.17601571829086e-14	gained-open
Peak_59667	chr7	99833080	99834400	1321	99811439	99828417	upstream	4662	50877	Neu3	99834400	100.189801432067	1.85187849114527	0.232893780626737	7.95160131009815	1.84115964656956e-15	1.36829553346257e-14	gained-open
Peak_56472	chr6	128143702	128144025	324	127961400	128143578	upstream	123	109246	Tspan9	128144025	37.3458206250216	-2.68611292733308	0.339696804142402	-7.90738356845728	2.62854779625204e-15	1.92933482568859e-14	gained-close
Peak_68158	chr9	119160783	119160954	172	119148043	119157093	upstream	3689	235674	Acaa1b	119160954	34.9102082215895	-2.90872801476129	0.368660821188994	-7.88998409264142	3.02225056930163e-15	2.20561393524278e-14	gained-close
Peak_30102	chr17	48145887	48146588	702	48125605	48146307	overlapStart	0	328829	9830107B12Rik	48146588	77.2674421734343	2.04287375428629	0.258936296303144	7.88948395204759	3.03438647141891e-15	2.21400984602603e-14	gained-open
Peak_20134	chr14	18893650	18894160	511	18573577	18893627	upstream	22	218793	Ube2e2	18894160	40.9258402045645	-2.52485874125928	0.320377501546083	-7.88088654501259	3.25066366611193e-15	2.36492525825133e-14	gained-close
Peak_19911	chr13	117602223	117602736	514	117602320	117981028	overlapStart	0	15165	Hcn1	117602736	88.1888964432578	-1.74649499620533	0.221764492432035	-7.87544920763448	3.39520784685723e-15	2.46752447589262e-14	gained-close
Peak_43683	chr3	97627913	97628196	284	97628804	97655287	upstream	607	14263	Fmo5	97628196	72.9363350264262	-1.87171328922436	0.23787998529243	-7.86830925234603	3.59466107178912e-15	2.60815606194689e-14	gained-close
Peak_29333	chr17	32031630	32032025	396	32036162	32062862	upstream	4136	72462	Rrp1b	32032025	102.196856703136	-1.67207893705356	0.212886018570862	-7.85433890059337	4.01886260601305e-15	2.9081189759339e-14	gained-close
Peak_58550	chr7	55767937	55768243	307	55768178	55778925	overlapStart	0	233274	Siglech	55768243	36.6861792885508	-2.72760541156157	0.347857343130119	-7.84116093976283	4.463998578055e-15	3.21661987336619e-14	gained-close
Peak_64246	chr8	121125349	121125792	444	121127685	121130644	upstream	1892	14241	Foxl1	121125792	43.7830497950384	-2.42792334919763	0.310543020556589	-7.81831562289193	5.35348250028852e-15	3.82961840261868e-14	gained-close
Peak_1378	chr1	74307329	74307853	525	74288247	74304336	upstream	2992	69660	Tmbim1	74307853	84.3097984791082	1.96970687899327	0.252409629221769	7.80361226735401	6.01598372715209e-15	4.28735887345145e-14	gained-open
Peak_60553	chr7	126083766	126084164	399	125878419	126082411	upstream	1354	269994	Gsg1l	126084164	42.9259311377645	-2.39089213882959	0.306636324244675	-7.79715888102618	6.33165024726852e-15	4.50454074651738e-14	gained-close
Peak_58259	chr7	44670737	44671074	338	44605803	44670843	overlapStart	0	71960	Myh14	44671074	50.7341788833245	-2.27621825213269	0.291976559842757	-7.79589379831908	6.39541592299826e-15	4.54806028115633e-14	gained-close
Peak_22346	chr14	103046809	103047213	405	103047012	103056573	overlapStart	0	16365	Acod1	103047213	67.0014232759998	2.2502394288926	0.28943382205349	7.77462500037999	7.56712355521595e-15	5.35362732066942e-14	gained-open
Peak_195	chr1	17097497	17098005	509	16994938	17097889	overlapStart	0	57339	Jph1	17098005	43.528651160948	-2.39285882257251	0.307892455419992	-7.77173581375499	7.74177878361053e-15	5.47332834103788e-14	gained-close
Peak_29266	chr17	31207752	31208388	637	31208066	31242403	overlapStart	0	328795	Ubash3a	31208388	69.2587181633686	-1.85851492384512	0.239321189729769	-7.76577672016288	8.11463925601385e-15	5.7219384168713e-14	gained-close
Peak_44098	chr3	108726380	108726736	357	108678638	108722299	upstream	4080	76123	Gpsm2	108726736	116.666169369359	1.61987841008824	0.208986056522136	7.75113152066516	9.10772937272814e-15	6.39840112288433e-14	gained-open
Peak_56239	chr6	123261692	123262407	716	123262107	123275268	overlapStart	0	17474	Clec4d	123262407	108.845220038142	1.73191862531246	0.223795655295555	7.7388393578294	1.00328448111418e-14	7.02719969179876e-14	gained-open
Peak_55403	chr6	94699851	94700440	590	94604529	94700145	overlapStart	0	16206	Lrig1	94700440	58.2693607005355	-2.27025646474978	0.293452771845935	-7.73636060913298	1.02303030743135e-14	7.16121215201947e-14	gained-close
Peak_32918	chr18	77185637	77186107	471	77185847	77255450	overlapStart	0	225742	St8sia5	77186107	45.32345848399	-2.38440778213984	0.308225398756082	-7.73592245078664	1.02656025360162e-14	7.18448760261873e-14	gained-close
Peak_46883	chr4	107434249	107435215	967	107434591	107635059	overlapStart	0	230587	Glis1	107435215	113.275852877358	-1.66436278894093	0.215221825490669	-7.73324352744647	1.04840467349242e-14	7.33078414417187e-14	gained-close
Peak_15574	chr12	88290190	88290448	259	88282867	88287070	upstream	3119	633093	Gm7104	88290448	33.1333847358849	-2.95256674936833	0.382442606212922	-7.72028717878916	1.16067897613199e-14	8.09324901899628e-14	gained-close
Peak_57327	chr7	16097057	16097296	240	16098643	16117975	upstream	1346	108124	Napa	16097296	105.935109298096	1.74337083153956	0.226252643275964	7.7054164154588	1.30417315567478e-14	9.0488302262504e-14	gained-open
Peak_54624	chr6	65778748	65779427	680	65778962	65936377	overlapStart	0	70779	Prdm5	65779427	61.3617489312378	-2.38189147352375	0.310655138178591	-7.66731716555235	1.75631112514748e-14	1.20559232788458e-13	gained-close
Peak_37562	chr2	64098163	64098602	440	63971508	64098038	upstream	124	60344	Fign	64098602	25.7507144935352	-3.78131125609693	0.493351638828383	-7.66453571549257	1.79479259683403e-14	1.23104341509791e-13	gained-close
Peak_31218	chr18	4634826	4635292	467	4634929	4682869	overlapStart	0	240185	Jcad	4635292	57.7590927694522	-2.13334488765916	0.279219174232946	-7.64039537585396	2.16555705884089e-14	1.47654105782314e-13	gained-close
Peak_64478	chr8	123570675	123571103	429	123538784	123566087	upstream	4587	100861480	Gm25018	123571103	94.4129438094946	-1.55229741494559	0.203345674528338	-7.63378625361056	2.27957742425513e-14	1.55036465763465e-13	gained-close
Peak_11813	chr11	94760357	94761235	879	94755136	94761182	overlapStart	0	217122	Gm11545	94761235	98.356854127957	1.80921678932154	0.237719187696924	7.61073099251952	2.72549981980083e-14	1.8413204783941e-13	gained-open
Peak_40240	chr2	152683435	152684429	995	152687148	152687946	upstream	2718	66405	Mcts2	152684429	128.33935272828	1.52378924445182	0.200676929027537	7.5932457798511	3.11989961276264e-14	2.09726751214303e-13	gained-open
Peak_31347	chr18	9212021	9213331	1311	9212856	9216201	overlapStart	0	14370	Fzd8	9213331	80.4923617083703	-1.76561336364038	0.232769683225577	-7.58523764423964	3.31878212706916e-14	2.22733154945207e-13	gained-close
Peak_34547	chr19	34582805	34583662	858	34583529	34588982	overlapStart	0	15959	Ifit3	34583662	101.536065031682	1.68859548058381	0.22297833030475	7.57291292959261	3.64946922865745e-14	2.43946078358209e-13	gained-open
Peak_68469	chr9	123979913	123981283	1371	123976949	123978408	upstream	1504	12770	Ccr1l1	123981283	97.0094492891105	1.68342566828325	0.22238271050215	7.56994851120396	3.73372186417963e-14	2.49459003048976e-13	gained-open
Peak_11614	chr11	87578314	87578877	564	87578389	87590539	overlapStart	0	18952	Sept4	87578877	87.9805678248515	-1.63419474137715	0.216498252423927	-7.54830453863075	4.40960866215475e-14	2.92997711324395e-13	gained-close
Peak_64702	chr8	126844628	126845076	449	126849020	126851833	upstream	3943	414091	A630001O12Rik	126845076	92.901117741137	1.77903692886056	0.236332781830109	7.52767735006582	5.16508287865197e-14	3.41384183892657e-13	gained-open
Peak_48198	chr4	137433017	137433510	494	137421008	137430520	upstream	2496	67868	Cela3b	137433510	74.0116126823455	-1.80549548553606	0.240366892753899	-7.51141500749284	5.849164140815e-14	3.84929556805647e-13	gained-close
Peak_13117	chr11	117482706	117483434	729	117484368	117489014	upstream	933	432615	Gm11733	117483434	84.4544238327354	-1.62278376528155	0.216496100492839	-7.49567203098528	6.59595310531868e-14	4.32169263018792e-13	gained-close
Peak_19373	chr13	100452356	100453904	1549	100407770	100452864	overlapStart	0	17940	Naip1	100453904	115.787980497481	1.54793439123863	0.206706916196137	7.48854668108853	6.96404186579659e-14	4.55265798074117e-13	gained-open
Peak_14188	chr12	32816037	32816250	214	32820335	32853369	upstream	4084	59027	Nampt	32816250	90.1227388122233	1.75607668646643	0.23510977288984	7.46917775846447	8.06974670997984e-14	5.24081439032333e-13	gained-open
Peak_46064	chr4	56993369	56993798	430	56960136	56990391	upstream	2977	230235	Frrs1l	56993798	52.1987684268014	-2.12082884597979	0.284682348283618	-7.44980803610236	9.34761430420354e-14	6.04329124259501e-13	gained-close
Peak_46678	chr4	95967004	95967522	519	95967379	96024277	overlapStart	0	77963	Hook1	95967522	63.6417347836892	-2.08259896783974	0.279675288940493	-7.44648901849478	9.58570116021088e-14	6.19207865403951e-13	gained-close
Peak_30261	chr17	56139943	56140588	646	56123085	56140343	overlapStart	0	20359	Sema6b	56140588	71.6586697982224	-1.683764752209	0.226503623336274	-7.43372104784935	1.0558451458168e-13	6.79603410532025e-13	gained-close
Peak_7882	chr10	111159860	111160236	377	111164802	111297247	upstream	4565	237542	Osbpl8	111160236	99.6648146588071	1.6132536223849	0.217259536877691	7.42546746425728	1.12382291753398e-13	7.21900280961815e-13	gained-open
Peak_5539	chr10	31445525	31446141	617	31332380	31445921	overlapStart	0	21987	Tpd52l1	31446141	85.6513174175748	-1.69100943971786	0.227936486510087	-7.41877470171068	1.18208793342831e-13	7.57939047678986e-13	gained-close
Peak_23553	chr15	56696033	56696368	336	56665627	56694546	upstream	1486	15117	Has2	56696368	58.2166409460173	-1.93046805059144	0.260972323437737	-7.39721371661853	1.39071630936047e-13	8.86763405076622e-13	gained-close
Peak_12548	chr11	106354001	106354519	519	106318593	106349390	upstream	4610	110880	Scn4a	106354519	71.5686035456524	1.96785049043605	0.266903602144515	7.37288846843869	1.66970171699077e-13	1.05906837765862e-12	gained-open
Peak_68000	chr9	113739000	113739295	296	113741473	113919697	upstream	2177	76499	Clasp2	113739295	106.642943463955	1.58195517570673	0.21509255460582	7.35476492250431	1.91263415182169e-13	1.20682654943509e-12	gained-open
Peak_21869	chr14	70849954	70850575	622	70852933	70873954	upstream	2357	73648	2410012E07Rik	70850575	43.2827300736833	-2.28638037317868	0.310992914419793	-7.35187287930431	1.95448646900187e-13	1.23223660131704e-12	gained-close
Peak_43410	chr3	90695404	90695932	529	90692630	90695721	overlapStart	0	20202	S100a9	90695932	50.0585054091093	2.85132241920792	0.387916362935318	7.35035355980422	1.97683252212727e-13	1.24598899320888e-12	gained-open
Peak_62501	chr8	64692673	64693158	486	64592542	64693109	overlapStart	0	12876	Cpe	64693158	59.6040883266367	-1.94274698185894	0.264401299271044	-7.347721010506	2.01614760940517e-13	1.2699701840346e-12	gained-close
Peak_55206	chr6	88630906	88631500	595	88547722	88627448	upstream	3457	74589	Kbtbd12	88631500	72.7041376953325	-1.7210901163156	0.234239907222421	-7.34755292863632	2.01868370644711e-13	1.27145347448815e-12	gained-close
Peak_10266	chr11	62570468	62570694	227	62574486	62600305	upstream	3791	22368	Trpv2	62570694	67.7686705341887	2.04029753170381	0.277813872028224	7.34411682472262	2.07122157099068e-13	1.30325661616983e-12	gained-open
Peak_61098	chr7	140831540	140831749	210	140835199	140837968	upstream	3449	76974	Urah	140831749	47.2042455813907	2.75206971388866	0.375057511932664	7.33772721870652	2.17251376715063e-13	1.36478778243976e-12	gained-open
Peak_24975	chr15	90679677	90680190	514	90487481	90679388	upstream	288	66871	Cpne8	90680190	24.4693599561616	-3.44714559128762	0.469847576622999	-7.33673166107138	2.18872812035022e-13	1.37460436343263e-12	gained-close
Peak_33236	chr19	3419365	3419568	204	3409917	3414457	upstream	4907	14419	Gal	3419568	71.4549565005045	-1.86238762015863	0.25413919047492	-7.32821890507447	2.33231539393139e-13	1.46281770275971e-12	gained-close
Peak_55762	chr6	113703890	113704647	758	113707208	113707265	upstream	2560	102465631	Mir7042	113704647	76.3783075549937	1.93056193134051	0.263989460711484	7.31302653574659	2.61191409051869e-13	1.63045278958921e-12	gained-open
Peak_54765	chr6	72303960	72304481	522	72304610	72314373	upstream	128	20388	Sftpb	72304481	43.8293322325502	-2.16429261536915	0.296082386583763	-7.30976482708425	2.67610334953407e-13	1.66977896986542e-12	gained-close
Peak_24986	chr15	91572647	91573498	852	91267691	91573261	overlapStart	0	239606	Slc2a13	91573498	94.6128357652213	-1.63792968556017	0.224221371319295	-7.30496685450972	2.77335099758864e-13	1.72830482951736e-12	gained-close
Peak_44449	chr3	129429204	129429856	653	129433673	129434712	upstream	3816	435755	Pou5f1-rs4	129429856	52.1130829622185	2.48412420221841	0.340080547192233	7.30451718784796	2.7826409978138e-13	1.73394012527477e-12	gained-open
Peak_48583	chr4	145836933	145837420	488	145837219	145837992	overlapStart	0	236069	Gm13238	145837420	40.9674151432104	-2.35680859104318	0.322948553818689	-7.29778338740094	2.92547106819472e-13	1.81825649083393e-12	gained-close
Peak_14160	chr12	32376867	32377065	199	32378789	32382943	upstream	1723	72123	Ccdc71l	32377065	76.4979322727526	1.8485393465234	0.25330886665118	7.29757063367597	2.93009918513371e-13	1.82097160966754e-12	gained-open
Peak_18709	chr13	67378058	67378527	470	67363584	67375763	upstream	2294	408065	Zfp456	67378527	71.7094733288627	1.96888899788589	0.269806469073178	7.29741212154509	2.93355203712874e-13	1.82263292895065e-12	gained-open
Peak_5421	chr10	24838224	24838465	242	24773814	24836195	upstream	2028	209558	Enpp3	24838465	44.0885159540532	-2.3667555401079	0.324594622611066	-7.2914194359399	3.06706276858178e-13	1.90238182673517e-12	gained-close
Peak_15511	chr12	87262809	87262961	153	87266728	87273952	upstream	3766	217737	Ahsa1	87262961	54.1965688920544	2.38204183847627	0.326708620206375	7.29102843069027	3.07597841424221e-13	1.9074469350009e-12	gained-open
Peak_17429	chr13	33658662	33658895	234	33661405	33671585	upstream	2509	238568	Serpinb6d	33658895	32.5581134529428	-2.66650464505039	0.365809595449233	-7.28932394946006	3.11514200579183e-13	1.92964365211269e-12	gained-close
Peak_57724	chr7	27198497	27198662	166	27187006	27196271	upstream	2225	53607	Snrpa	27198662	69.2625135332018	2.05228793973123	0.281959663164448	7.27865793531702	3.37157361870711e-13	2.08333544141662e-12	gained-open
Peak_32522	chr18	62922165	62922634	470	62922327	62953195	overlapStart	0	494504	Apcdd1	62922634	72.3570830175024	-1.66871171391982	0.229600689862371	-7.26788632438383	3.65155863060115e-13	2.25098674026501e-12	gained-close
Peak_59406	chr7	92638236	92638474	239	92581723	92637142	upstream	1093	73845	Ankrd42	92638474	46.6571834537032	2.73767362736859	0.377516858633802	7.25179171408656	4.11294048165796e-13	2.52364702362308e-12	gained-open
Peak_3897	chr1	171642409	171642868	460	171641840	171641900	upstream	508	102465784	Mir7683	171642868	46.4842097414313	2.8040470995816	0.386811361628531	7.24913324100968	4.19447112159953e-13	2.57187308245445e-12	gained-open
Peak_43614	chr3	96340977	96341254	278	96345287	96358480	upstream	4032	100504145	Platr30	96341254	50.8819372730672	-1.95006269673773	0.269230281048221	-7.24310315000733	4.3853311915949e-13	2.68350434046004e-12	gained-close
Peak_3975	chr1	172555091	172555720	630	172555938	172563717	upstream	217	240916	Vsig8	172555720	62.50495302807	2.32998372382994	0.322287568587115	7.22951783106132	4.84711866761224e-13	2.95422763114321e-12	gained-open
Peak_3975	chr1	172555091	172555720	630	172541620	172550806	upstream	4284	71319	4933439K11Rik	172555720	62.50495302807	2.32998372382994	0.322287568587115	7.22951783106132	4.84711866761224e-13	2.95422763114321e-12	gained-open
Peak_69463	chrX	122396998	122397560	563	122394560	122397385	overlapStart	0	54561	Nap1l3	122397560	58.8695975908517	-1.85860367399741	0.257265293658909	-7.22446330619944	5.03084675976366e-13	3.06115196774688e-12	gained-close
Peak_33684	chr19	9087692	9088590	899	9083642	9087956	overlapStart	0	22287	Scgb1a1	9088590	72.8794667331105	2.06428642731029	0.286300600823353	7.21020641023366	5.58671261122286e-13	3.38616295534433e-12	gained-open
Peak_50159	chr5	50058558	50059187	630	49959951	50058996	overlapStart	0	70693	Adgra3	50059187	86.5038964713321	-1.63720241703676	0.227144895401382	-7.20774470473437	5.68861524982264e-13	3.44584257484722e-12	gained-close
Peak_35171	chr19	50678476	50679189	714	50143301	50678646	overlapStart	0	58178	Sorcs1	50679189	47.4635246418093	-2.13582648387958	0.296499322593285	-7.20347846058771	5.86955573786072e-13	3.55237791304268e-12	gained-close
Peak_44365	chr3	122805369	122805685	317	122795091	122801980	upstream	3388	71647	4930447N08Rik	122805685	22.515488348246	-3.40253006421959	0.472366511853342	-7.20315682597752	5.88342372931928e-13	3.56015665580974e-12	gained-close
Peak_9310	chr11	33513045	33513773	729	33211794	33513746	overlapStart	0	66011	Ranbp17	33513773	48.5751367178847	-2.00916555202126	0.278933837550433	-7.20301835612895	5.88940406558312e-13	3.56316058774621e-12	gained-close
Peak_47095	chr4	116682982	116683563	582	116685599	116700000	upstream	2035	18477	Prdx1	116683563	97.6980220559519	1.61017058387666	0.223655305875214	7.19933997351724	6.0504719621214e-13	3.65682307927835e-12	gained-open
Peak_33410	chr19	5362374	5362732	359	5366813	5371511	upstream	4080	69860	Eif1ad	5362732	48.3186468092208	2.52896387908496	0.351421554755661	7.19638236431829	6.18310840993886e-13	3.73569901890285e-12	gained-open
Peak_21049	chr14	51926504	51926991	488	51922160	51922773	upstream	3730	497071	Rnase13	51926991	33.81773224113	-2.65260840779254	0.369495576206124	-7.17899909662997	7.02236102100359e-13	4.22383572458014e-12	gained-close
Peak_63430	chr8	94150993	94151208	216	94152607	94154148	upstream	1398	17751	Mt3	94151208	38.6984148375669	-2.31869100711605	0.323167291093936	-7.17489384296032	7.23633139044569e-13	4.34768807852418e-12	gained-close
Peak_5998	chr10	52233590	52234108	519	52233619	52321377	overlapStart	0	66686	Dcbld1	52234108	60.4893245008763	-1.84612099045684	0.258761813302707	-7.13444138798483	9.71810140041056e-13	5.78082786696347e-12	gained-close
Peak_9634	chr11	51023823	51024232	410	51027004	51027945	upstream	2771	18354	Olfr54	51024232	21.676346379744	-3.51096593117227	0.492323225652415	-7.13142453622745	9.93354114731074e-13	5.90197425689888e-12	gained-close
Peak_18439	chr13	56549432	56549732	301	56542460	56548538	upstream	893	16841	Lect2	56549732	89.660397013374	-1.55226308457439	0.218266271015874	-7.11178633945462	1.14550504814226e-12	6.77041172605436e-12	gained-close
Peak_47390	chr4	123914698	123914866	169	123917433	123936997	upstream	2566	54170	Rragc	123914866	63.6523100796277	2.0425702306836	0.287357540471611	7.10811425839507	1.17639155829879e-12	6.94477013115904e-12	gained-open
Peak_24841	chr15	85331157	85331409	253	85336381	85463836	upstream	4971	54138	Atxn10	85331409	35.6187279933225	-2.4356523594922	0.342969973871272	-7.1016489636098	1.23277035784807e-12	7.2665896374986e-12	gained-close
Peak_15547	chr12	87857888	87858278	391	87861350	87865690	upstream	3071	100038982	Gm1995	87858278	38.0137231481224	-2.57155188301075	0.362540717806145	-7.09313949222606	1.3110318852324e-12	7.70782120940597e-12	gained-close
Peak_933	chr1	55367188	55367594	407	55300069	55363469	upstream	3718	75388	Boll	55367594	26.4823147839125	-2.87441851114765	0.40536557294697	-7.0909290353665	1.33214646989754e-12	7.82343228716499e-12	gained-close
Peak_63322	chr8	88520909	88521669	761	88521344	88594887	overlapStart	0	93960	Nkd1	88521669	86.2058286257217	-1.57464221203936	0.224114988552001	-7.02604596958491	2.12468485119278e-12	1.22854747026715e-11	gained-close
Peak_33291	chr19	3986422	3986771	350	3986570	3990007	overlapStart	0	71670	Acy3	3986771	54.1704155857217	-1.88127731553808	0.26794723413438	-7.02107383797287	2.20169454674597e-12	1.27160869346072e-11	gained-close
Peak_122	chr1	12992056	12992762	707	12866549	12991135	upstream	920	240726	Slco5a1	12992762	58.3941213697131	-1.8979885380069	0.272098075335132	-6.97538391504322	3.05036664739932e-12	1.73772531948709e-11	gained-close
Peak_12499	chr11	105589396	105589825	430	105589986	105929304	upstream	160	77097	Tanc2	105589825	53.3132998580935	-2.28573093470521	0.327716085597636	-6.97472914866802	3.06460653506273e-12	1.74527040295213e-11	gained-close
Peak_54578	chr6	57034383	57035160	778	57035913	57037125	upstream	752	171205	Vmn1r8	57035160	82.1180139212304	1.69959342854331	0.244048365395314	6.96416640935199	3.30353934644133e-12	1.87737723834349e-11	gained-open
Peak_49930	chr5	36397824	36398283	460	36017180	36398139	overlapStart	0	81840	Sorcs2	36398283	56.6339068942527	-1.83250833029182	0.263272529004733	-6.96049959036508	3.39068147822679e-12	1.92518348536658e-11	gained-close
Peak_11571	chr11	86811947	86812173	227	86768849	86807660	upstream	4286	67487	Dhx40	86812173	70.517468638292	-1.60293052976619	0.230406140301059	-6.95697834993345	3.47648358489266e-12	1.97134721263969e-11	gained-close
Peak_56839	chr6	142391069	142391431	363	142350342	142387087	upstream	3981	19691	Recql	142391431	52.832149990603	2.23263039065619	0.322211703157069	6.92907913890343	4.23588806039111e-12	2.38480803836726e-11	gained-open
Peak_47141	chr4	117545536	117545822	287	117550324	117674297	upstream	4501	140546	Eri3	117545822	77.530591970728	1.70312447029952	0.247178951210674	6.89024879326362	5.5694895512555e-12	3.09954777573561e-11	gained-open
Peak_44964	chr3	155056449	155057208	760	154786291	155055407	upstream	1041	435766	Tnni3k	155057208	98.6041989806613	1.52797554761898	0.222452326415603	6.86877755894668	6.47543837584265e-12	3.58212588431119e-11	gained-open
Peak_20256	chr14	21747865	21748083	219	21750531	21798725	upstream	2447	67630	Samd8	21748083	74.7788438765673	1.8655978843341	0.273052607065399	6.83237528615601	8.35200071851364e-12	4.57653618557323e-11	gained-open
Peak_69420	chrX	107148726	107149609	884	107148927	107173661	overlapStart	0	213438	P2ry10b	107149609	78.6469900428245	1.64709324857697	0.242455328038201	6.79338854668293	1.09529862498546e-11	5.93499022375842e-11	gained-open
Peak_58220	chr7	44135801	44136667	867	44137290	44141610	upstream	622	16615	Klk1b16	44136667	63.9820207524212	1.90067836143463	0.279965436446401	6.78897504477668	1.12932971968619e-11	6.10900742234873e-11	gained-open
Peak_66092	chr9	56165472	56166447	976	56131725	56161070	upstream	4401	56434	Tspan3	56166447	92.9148321645114	1.53426624559249	0.226055038123577	6.78713581580852	1.14381523500048e-11	6.18307336798893e-11	gained-open
Peak_1240	chr1	66175085	66175595	511	66175329	66442583	overlapStart	0	17756	Map2	66175595	43.4097016169778	-2.05079441404765	0.302287944061845	-6.78424149667073	1.16697982967198e-11	6.30362070864559e-11	gained-close
Peak_58422	chr7	46712359	46712518	160	46686108	46710651	upstream	1707	78935	Saal1	46712518	72.7504935146577	-1.58112149752137	0.233212732525295	-6.7797391694721	1.20393038415221e-11	6.49651839899567e-11	gained-close
Peak_8986	chr11	22342324	22342946	623	22005825	22342292	upstream	31	216565	Ehbp1	22342946	45.9558665997356	2.50753149825406	0.370517364824579	6.76764906670771	1.30891766121603e-11	7.03920882862235e-11	gained-open
Peak_54109	chr6	42711808	42712162	355	42669466	42710071	upstream	1736	77574	Tcaf1	42712162	40.9374927842142	2.66743520237183	0.394147243684543	6.76761095025371	1.30926243301976e-11	7.04052309576558e-11	gained-open
Peak_45745	chr4	45292319	45292876	558	45297168	45316131	upstream	4291	69934	Trmt10b	45292876	22.6450202306275	-3.03042565466268	0.448398232997154	-6.7583354073608	1.39586098308529e-11	7.48668693229739e-11	gained-close
Peak_3978	chr1	172590263	172591047	785	172581377	172590568	overlapStart	0	74748	Slamf8	172591047	62.2884284728861	1.93364726393544	0.28703979759979	6.73651277664102	1.62233034016376e-11	8.65567848966945e-11	gained-open
Peak_68137	chr9	118606575	118606905	331	118606709	118901003	overlapStart	0	104099	Itga9	118606905	37.514637266523	-2.2166694804843	0.330252603910801	-6.71204240098289	1.91918903856778e-11	1.01737327922807e-10	gained-close
Peak_26981	chr16	37384862	37385086	225	37107307	37384958	overlapStart	0	207227	Stxbp5l	37385086	35.7087184427432	-2.47380138571729	0.368629235537159	-6.71081169704978	1.93544739862799e-11	1.02544936471993e-10	gained-close
Peak_28592	chr17	17884839	17885049	211	17887824	17971677	upstream	2774	14289	Fpr2	17885049	32.573091806315	4.05731917132392	0.60512819439746	6.70489196981457	2.01555423283154e-11	1.06620052052477e-10	gained-open
Peak_28592	chr17	17884839	17885049	211	17876471	17883939	upstream	899	14293	Fpr1	17885049	32.573091806315	4.05731917132392	0.60512819439746	6.70489196981457	2.01555423283154e-11	1.06620052052477e-10	gained-open
Peak_33851	chr19	11690933	11691193	261	11667460	11691051	overlapStart	0	170834	Oosp1	11691193	32.5380911332163	-2.48130027853481	0.370369954751104	-6.69951827005593	2.09107724584389e-11	1.10431867833411e-10	gained-close
Peak_27665	chr16	90215090	90215948	859	90220742	90226324	upstream	4793	20655	Sod1	90215948	89.585446062642	1.53143221039665	0.228602577294921	6.69910299576781	2.09702758051749e-11	1.10729455275864e-10	gained-open
Peak_31727	chr18	32559512	32560146	635	32528320	32560034	overlapStart	0	71683	Gypc	32560146	64.1593832330589	-1.71287406412745	0.255751658514251	-6.69741136412613	2.12143821331938e-11	1.11950960281962e-10	gained-close
Peak_54941	chr6	83711109	83711471	363	83711264	83738304	overlapStart	0	24113	Vax2	83711471	46.4290916129948	-2.07466532710862	0.309984505933574	-6.69280330918603	2.18935329767598e-11	1.15335322486223e-10	gained-close
Peak_48782	chr4	150064327	150064672	346	150068454	150068555	upstream	3781	723848	Mir34a	150064672	76.8672447510432	1.69086543221825	0.253128682507769	6.67986502148509	2.39162425543516e-11	1.25472609146046e-10	gained-open
Peak_64979	chr9	15706678	15706940	263	15709769	15738789	upstream	2828	234967	Slc36a4	15706940	91.1466829490255	1.56535202204763	0.234608792191225	6.67217970574495	2.5203167831815e-11	1.31878965123382e-10	gained-open
Peak_59366	chr7	90029080	90029765	686	90029159	90049071	overlapStart	0	319711	E230029C05Rik	90029765	59.956082648121	1.93600342023236	0.290414063373219	6.66635560876523	2.62233430086821e-11	1.37015022168776e-10	gained-open
Peak_33546	chr19	6543574	6543846	273	6535854	6543070	upstream	503	20521	Slc22a12	6543846	49.9876340798282	-1.92200682968911	0.289761330282643	-6.63306876667884	3.28778539421361e-11	1.70108633753141e-10	gained-close
Peak_43506	chr3	95360379	95360668	290	95323525	95357202	upstream	3176	84505	Setdb1	95360668	38.2687430141159	-2.22490428667771	0.33552977558844	-6.63101890965043	3.33377518850831e-11	1.72360969624514e-10	gained-close
Peak_62313	chr8	41824993	41825459	467	41827267	42046202	upstream	1807	69966	2810404M03Rik	41825459	61.7108627817118	-1.64484431574381	0.24854190711893	-6.61797575632483	3.64150726449433e-11	1.87552198708071e-10	gained-close
Peak_54190	chr6	48536181	48536355	175	48537569	48541801	upstream	1213	76252	Atp6v0e2	48536355	53.5895688890158	-1.74708434471524	0.264388880734076	-6.60800991276359	3.89520612756157e-11	2.00089717530415e-10	gained-close
Peak_12867	chr11	114994786	114995315	530	114982443	114989886	upstream	4899	217305	Cd300ld	114995315	64.4544808264738	1.81820076876484	0.275251795409003	6.60559095014489	3.95934738998481e-11	2.03235680671745e-10	gained-open
Peak_27083	chr16	43979386	43979909	524	43969146	43979788	overlapStart	0	332175	Zdhhc23	43979909	33.7211562262278	-2.22344788651321	0.33758595843038	-6.58631625809089	4.50872912707999e-11	2.3042610801726e-10	gained-close
Peak_61619	chr8	12873678	12873927	250	12873827	13020509	overlapStart	0	17207	Mcf2l	12873927	38.7147797329144	-2.10721127376974	0.320381977582274	-6.57718417768553	4.79440769330616e-11	2.44453794805264e-10	gained-close
Peak_62301	chr8	41138237	41138922	686	40990912	41133726	upstream	4510	102103	Mtus1	41138922	65.6324440615371	1.77681624139014	0.270680728181162	6.56425100275681	5.22950489907782e-11	2.65788004266269e-10	gained-open
Peak_47294	chr4	120978148	120979007	860	120973259	120973322	upstream	4825	102465614	Mir7015	120979007	58.4339448465483	1.93048903873158	0.294655764447033	6.55167579142541	5.68949593342245e-11	2.88456168798321e-10	gained-open
Peak_13944	chr12	23009872	23010313	442	22953997	23010243	overlapStart	0	69732	2410018L13Rik	23010313	17.883402569702	-3.75016809153889	0.573044369963971	-6.54428921756037	5.97790113442126e-11	3.0248783568569e-10	gained-close
Peak_45644	chr4	42968487	42969033	547	42969946	42974325	upstream	912	67317	1700022I11Rik	42969033	77.3421833742946	1.63550943852781	0.250573956846171	6.52705276762604	6.70764212210669e-11	3.38047617813818e-10	gained-open
Peak_19988	chr14	5812317	5812672	356	5365792	5807939	upstream	4377	100041678	Gm3500	5812672	22.1421488195623	-2.92710139386007	0.448538338683174	-6.52586666828414	6.76094439334678e-11	3.40538145029151e-10	gained-close
Peak_18560	chr13	62859269	62859519	251	62836885	62858370	upstream	898	14120	Fbp2	62859519	46.2955515663671	-1.88413059980148	0.288831364585066	-6.52328947207036	6.87819326067058e-11	3.46269706374711e-10	gained-close
Peak_11810	chr11	94707687	94708154	468	94694498	94704499	upstream	3187	432589	Gm11541	94708154	60.6286983591316	1.91593728099469	0.293783966668904	6.5215855811286	6.95680086771048e-11	3.50076282740288e-10	gained-open
Peak_41547	chr2	179442368	179442735	368	179442431	179899375	overlapStart	0	12561	Cdh4	179442735	17.7556614808777	-3.50861756433346	0.541231761006149	-6.48265275084918	9.01237631526024e-11	4.49292712623078e-10	gained-close
Peak_67668	chr9	106453511	106453787	277	106453838	106464012	upstream	50	59092	Pcbp4	106453787	57.8109116885268	-1.6214870361387	0.250235939392393	-6.47983275334427	9.18243446776137e-11	4.57315492492195e-10	gained-close
Peak_61128	chr7	141056938	141057602	665	141061274	141072119	upstream	3671	330671	B4galnt4	141057602	59.3884268533161	1.8417261069429	0.284926265987151	6.46386917177358	1.02059118274236e-10	5.05702426305424e-10	gained-open
Peak_61794	chr8	20875858	20876440	583	20876499	20889113	upstream	58	654455	Gm21944	20876440	54.1033237091284	-1.69718535171919	0.262613172546979	-6.46268172787707	1.02863497152172e-10	5.09400200944307e-10	gained-close
Peak_21671	chr14	66339885	66340129	245	66344296	66361680	upstream	4166	56471	Stmn4	66340129	32.7146076282412	3.22126607666329	0.499998012875903	6.44255775765011	1.17476634623354e-10	5.78499425364395e-10	gained-open
Peak_17081	chr13	23317417	23317679	263	23276204	23313407	upstream	4009	75322	4930557F10Rik	23317679	21.2058151393619	-3.07700843394554	0.478327246220178	-6.43285210754892	1.25231489025636e-10	6.15089293356323e-10	gained-close
Peak_20118	chr14	17660342	17660938	597	17660960	18038088	upstream	21	21834	Thrb	17660938	50.1256748889442	-1.81699926510918	0.282578308175155	-6.43007340812204	1.27542335400234e-10	6.2586948003251e-10	gained-close
Peak_65809	chr9	47530139	47530378	240	47530170	47853391	overlapStart	0	54725	Cadm1	47530378	39.9862002657038	-2.07929271181542	0.323765012337399	-6.42222795108128	1.34294115507234e-10	6.57621086640751e-10	gained-close
Peak_67944	chr9	111013906	111014539	634	111019292	111042766	upstream	4752	17002	Ltf	111014539	60.8181059291319	1.8913942648728	0.295071435150558	6.40995379274082	1.45563747465407e-10	7.1067332412053e-10	gained-open
[truncated: 263 more rows]

## Sheet: KO_vs_WT_d0
name	Chr	Peak Start	Peak End	length	Gene Start	Gene End	location	distance	Entrez id	Gene symbol	End	baseMean	log2FoldChange	lfcSE	stat	pvalue	padj	regulation
[truncated: 1,026 more rows]

[truncated: 1 more sheets: KO_vs_WT_d3]
