# Supplementary material for: C/EBPδ-induced epigenetic changes control the dynamic gene transcription of S100a8 and S100a9
Source: eLife journal article supplement (doi:10.7554/elife.75594), 2022-05-11

A

WT \_ day 3 vs day 0

EnhancedVolcano

● NS ● Log<sub>2</sub> FC ● p-value ● p-value and log<sub>2</sub> FC

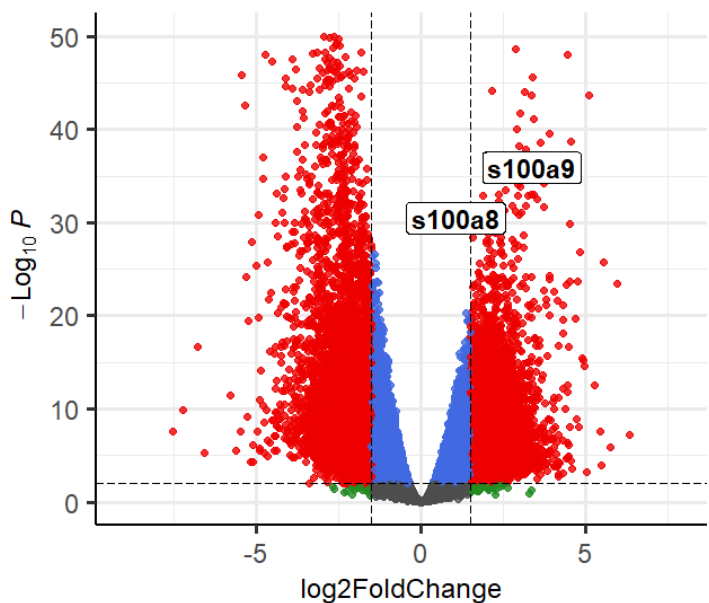

B

KO \_ day 3 vs day 0

EnhancedVolcano

● NS ● Log<sub>2</sub> FC ● p-value ● p-value and log<sub>2</sub> FC

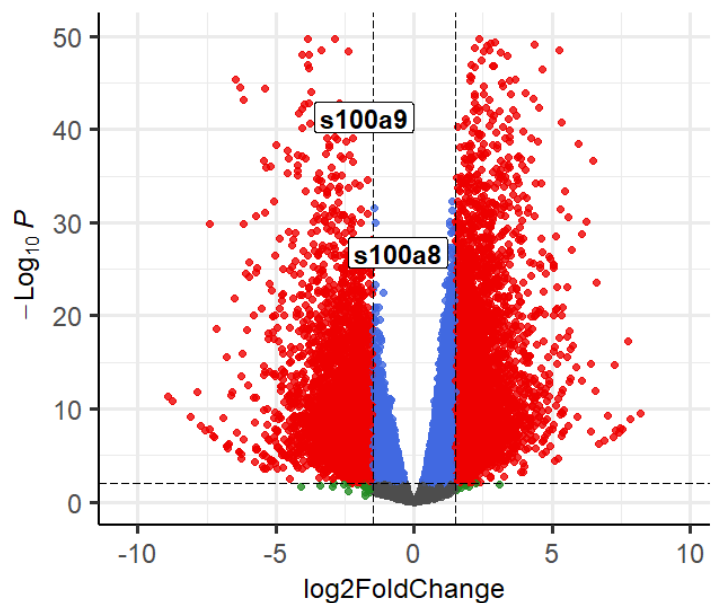

C

day 0\_ KO vs WT

EnhancedVolcano

● NS ● Log<sub>2</sub> FC ● p-value ● p-value and log<sub>2</sub> FC

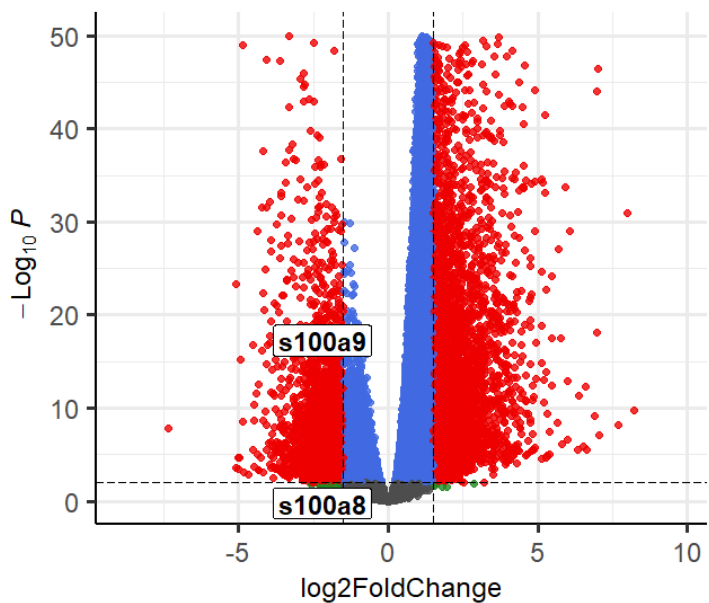

D

day 3\_ KO vs WT

EnhancedVolcano

● NS ● Log<sub>2</sub> FC ● p-value ● p-value and log<sub>2</sub> FC

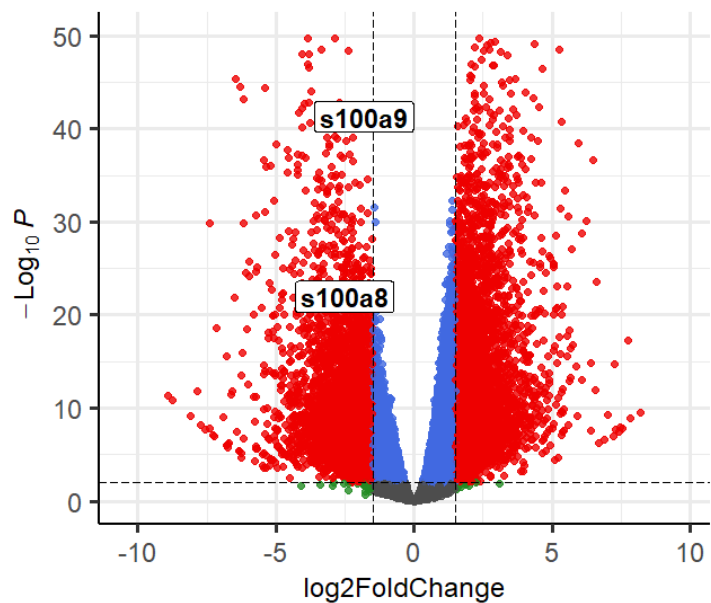

Supplement: supp [file elife_poa_e75594_Figure_7_figure_supplement_1.pdf › elife_poa_e75594_Figure_7_figure_supplement_1.pdf]
