# Supplementary figures and images for: C/EBPδ-induced epigenetic changes control the dynamic gene transcription of S100a8 and S100a9
Source: eLife journal article supplement (doi:10.7554/elife.75594), 2022-05-11

A

*S100a8*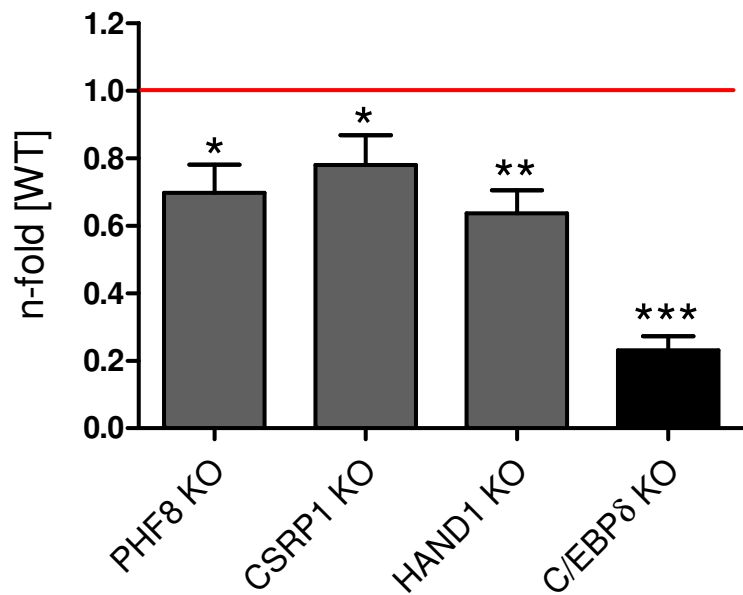*S100a9*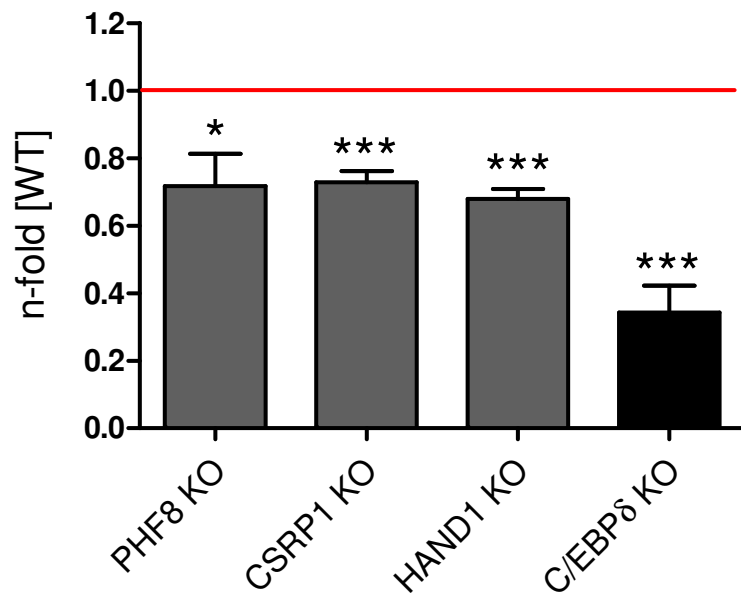

B

*S100a8*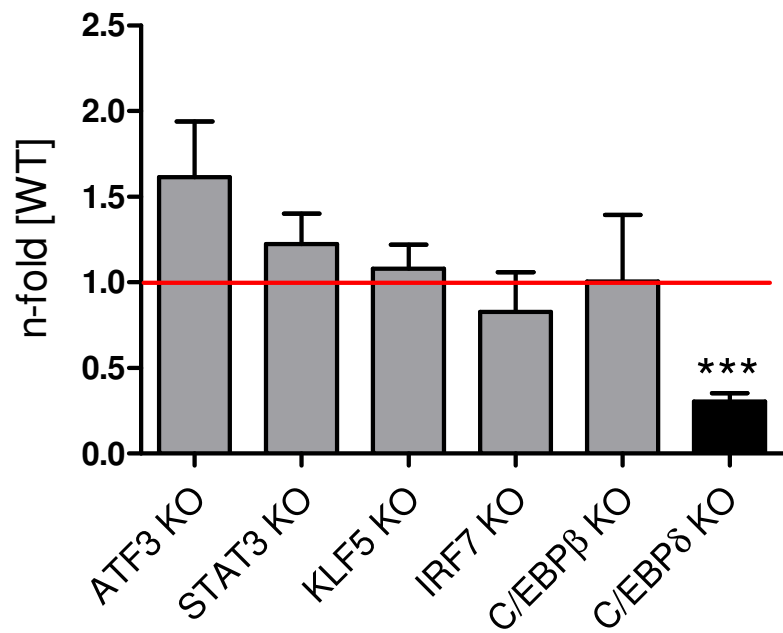*S100a9*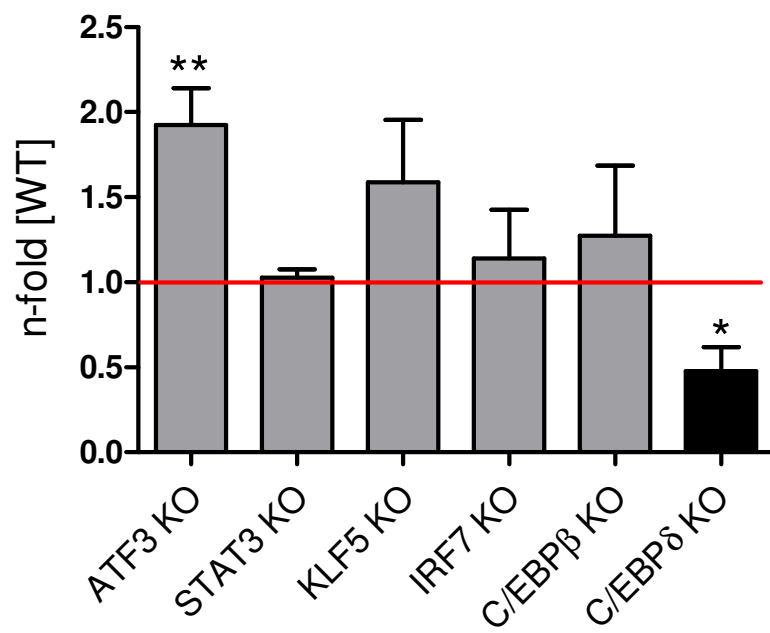

Supplement: supp [file elife_poa_e75594_Figure_1_figure_supplement_1.pdf › elife_poa_e75594_Figure_1_figure_supplement_1.pdf]

A

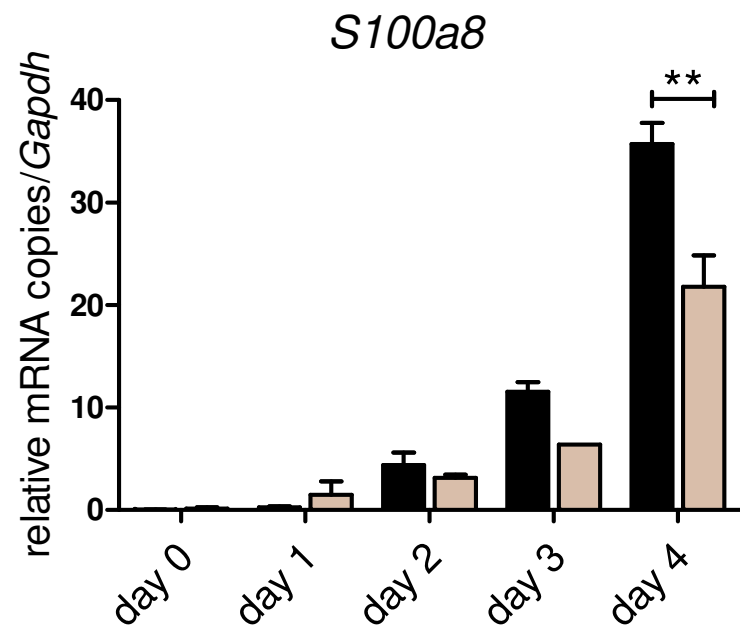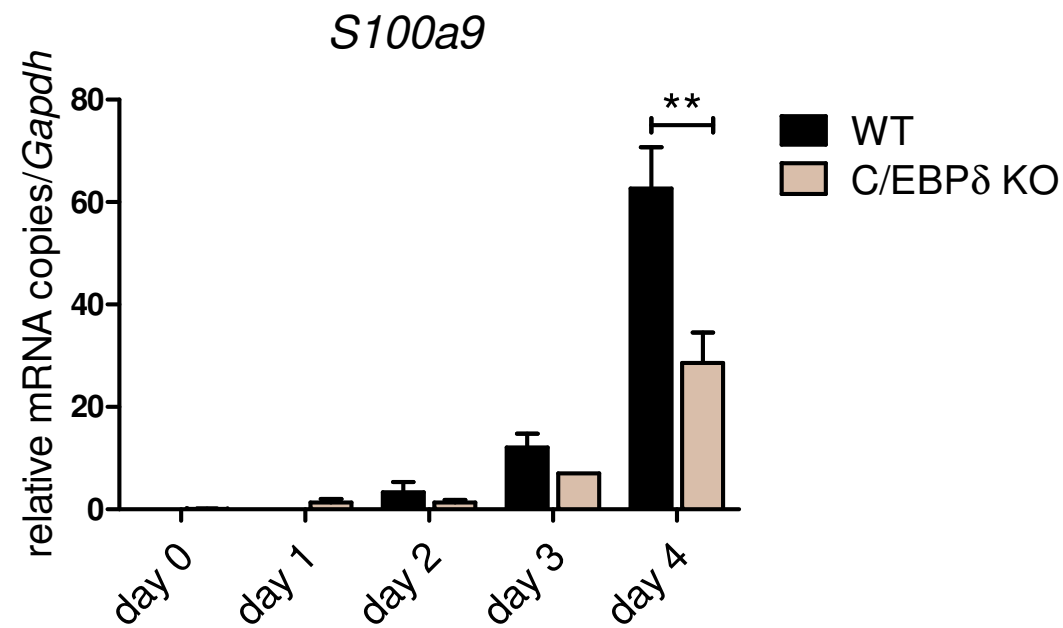

B

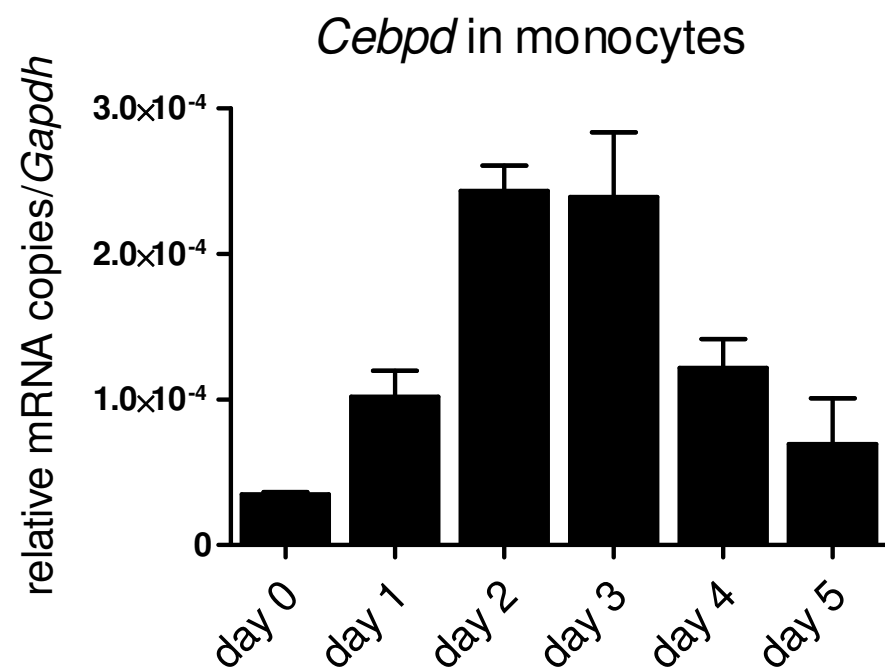

C

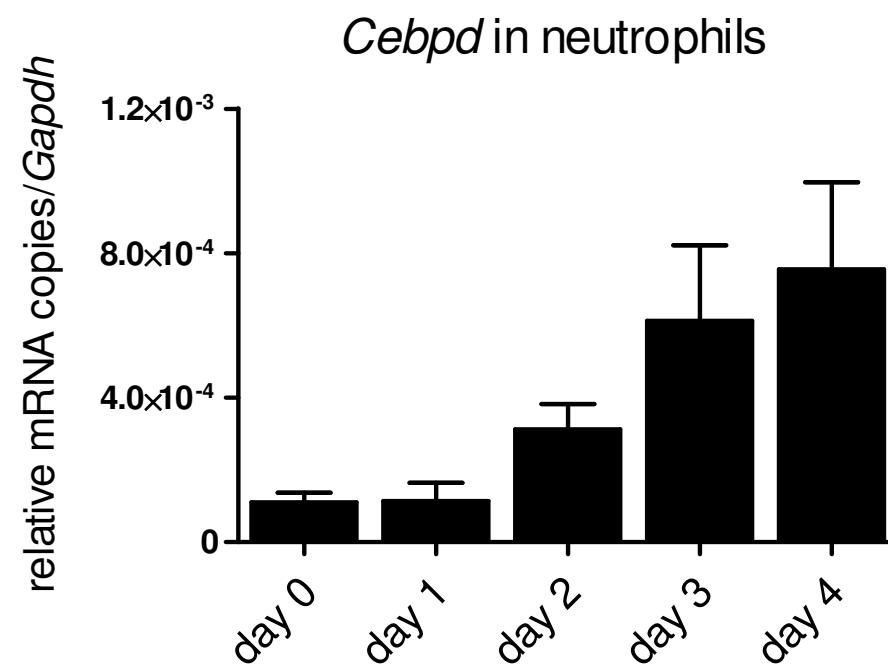

Supplement: supp [file elife_poa_e75594_Figure_2_figure_supplement_1.pdf › elife_poa_e75594_Figure_2_figure_supplement_1.pdf]

IL-1 $\alpha$ 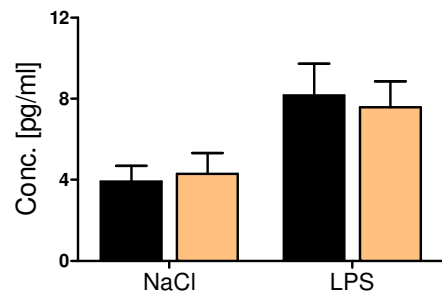IFN- $\gamma$ 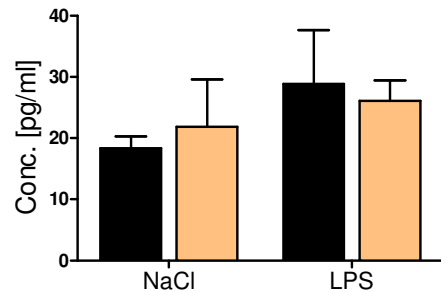

IL-6

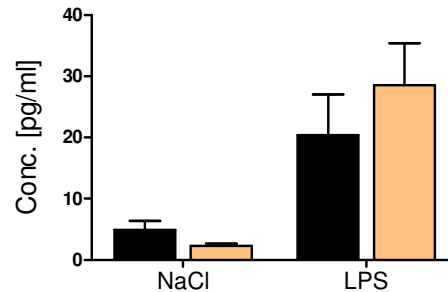

GM-CSF

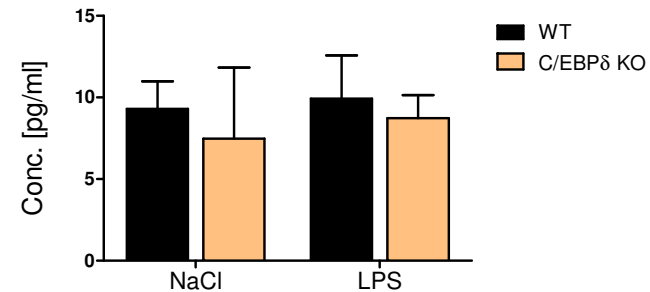

MCP-1

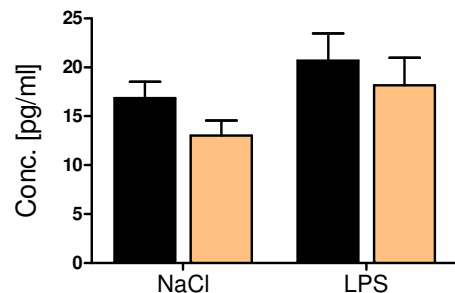IL-12<sub>p70</sub>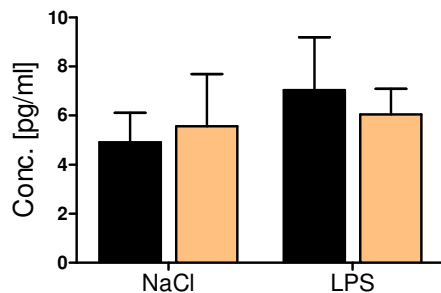IL-1 $\beta$ 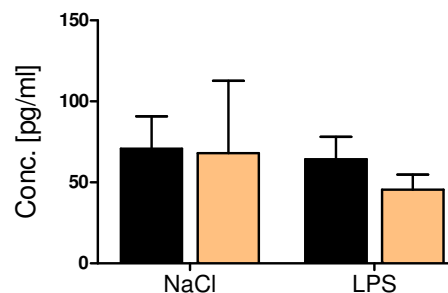TNF- $\alpha$ 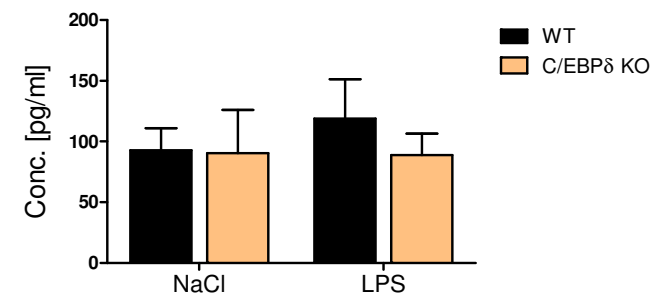

IL-10

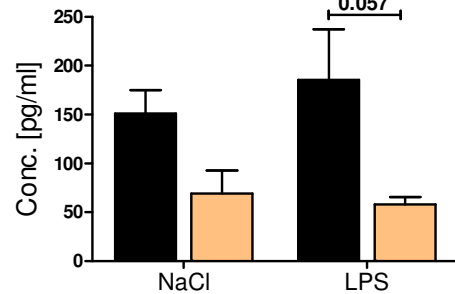

IL-27

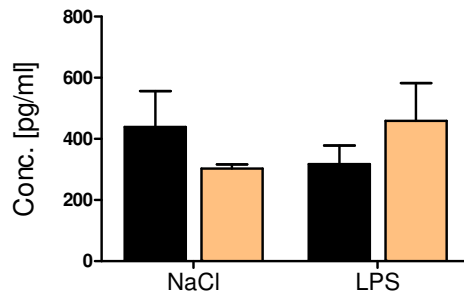

IL-17A

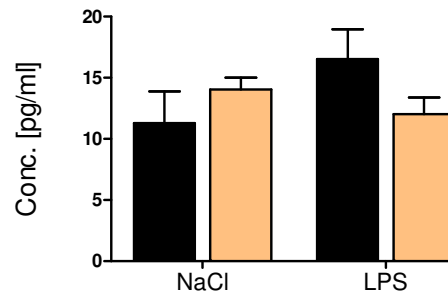IFN- $\beta$ 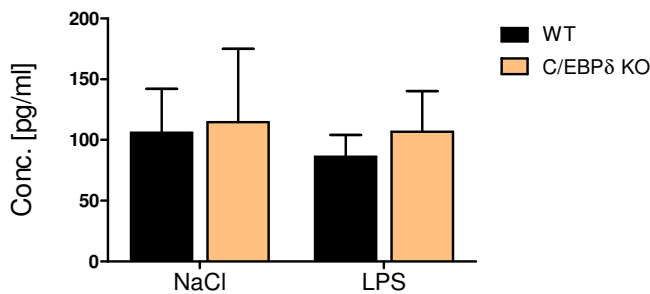

Supplement: supp [file elife_poa_e75594_Figure_2_figure_supplement_2.pdf › elife_poa_e75594_Figure_2_figure_supplement_2.pdf]

A

*Ptx3*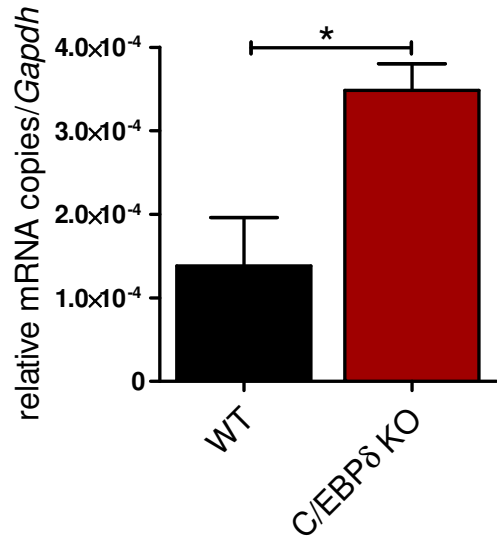

B

*Cd209a*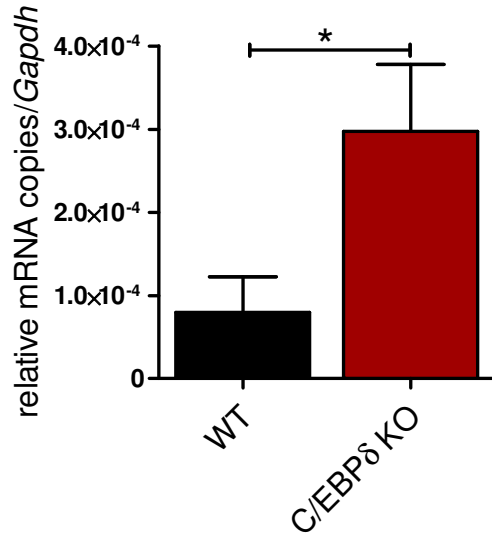

C

*Msr1*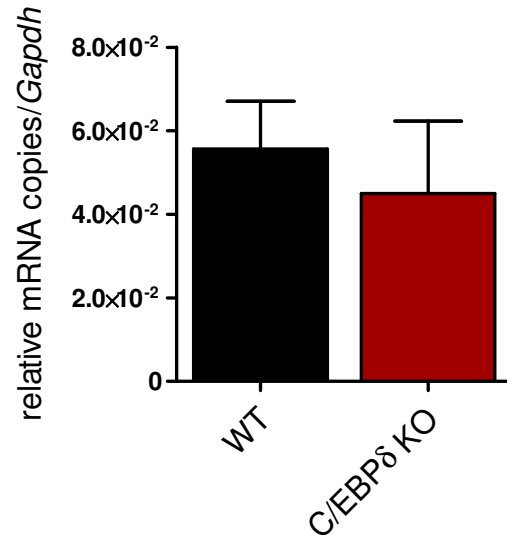

D

*Cd14*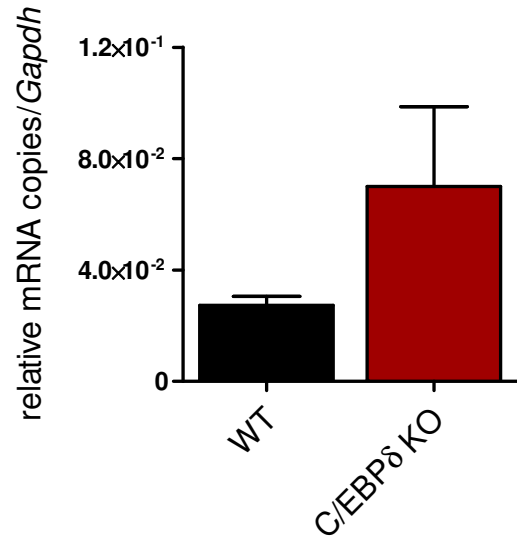

Supplement: supp [file elife_poa_e75594_Figure_3_figure_supplement_1.pdf › elife_poa_e75594_Figure_3_figure_supplement_1.pdf]

**A**

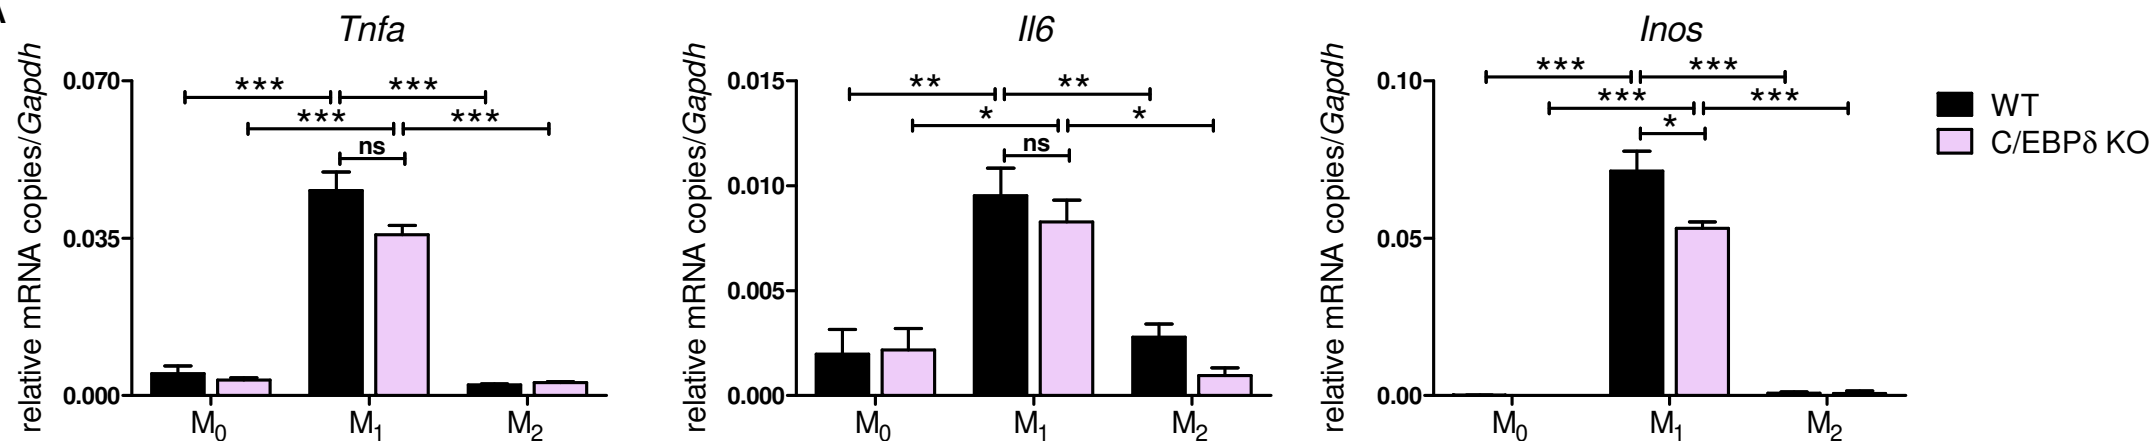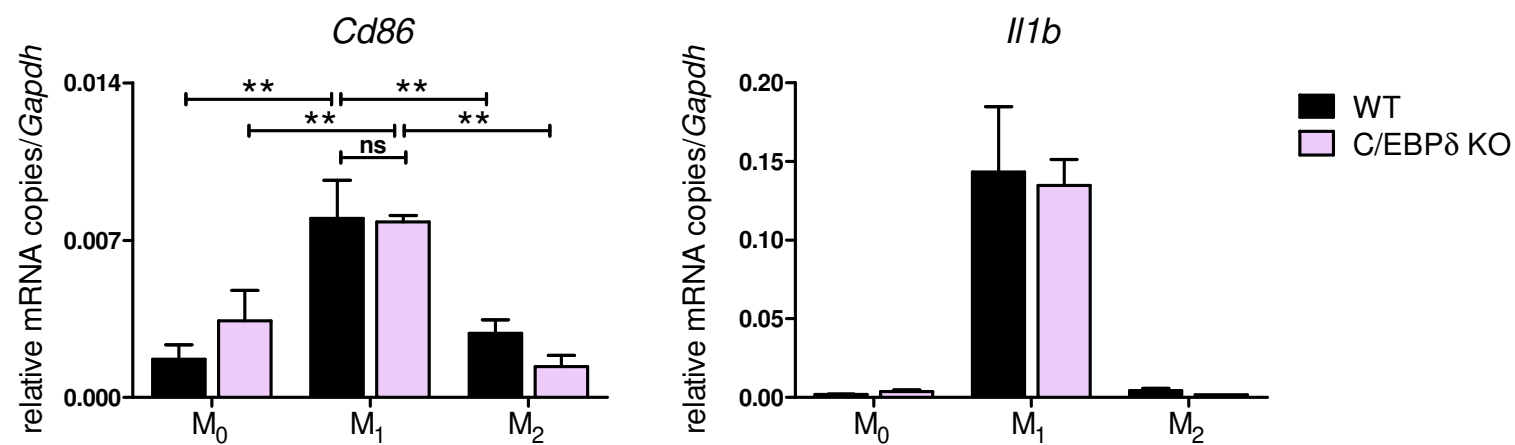

# B

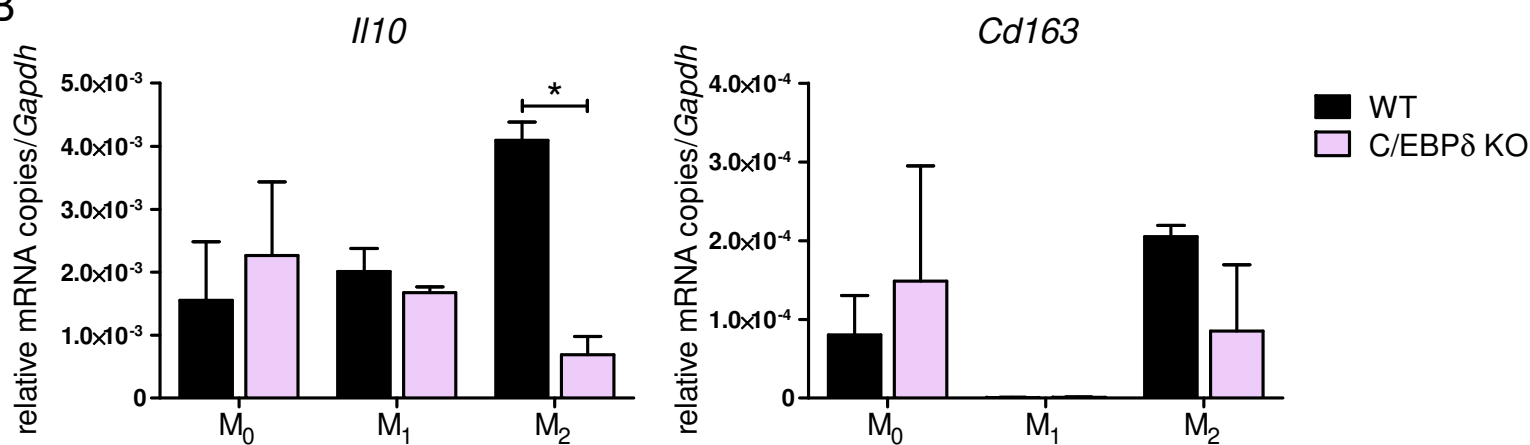

Supplement: supp [file elife_poa_e75594_Figure_3_figure_supplement_2.pdf › elife_poa_e75594_Figure_3_figure_supplement_2.pdf]
